# Supplementary material
Source: MDPI journal article supplement (https://www.mdpi.com/2071-1050/12/19/8225)
Supplement: s1 [file s1]

## Sheet: Summary
Sustainability
Environmental sustainability assessment of energy scenarios: Methodological approach and case study for Germany
Supplementary Material
Tobias Junnea,*, Sonja Simona, Jens Buchgeistera,b, Maximilian Saigera,1, Manuel Baumannb, Martina Haaseb, Christina Wulfc, Tobias Naeglera
a Department of Energy Systems Analysis, Institute of Engineering Thermodynamics, German Aerospace Center (DLR), Stuttgart, Germany
b Institute for Technology Assessment and Systems Analysis (ITAS), Karlsruhe Institute of Technology, Karlsruhe, Germany
c Institute of Energy and Climate Research, Systems Analysis and Technology Evaluation (IEK-STE), Forschungszentrum Jülich, Jülich, Germany
* Corresponding author. Contact: phone: +49 (0)711 6862-8277, email: Tobias.Junne@dlr.de
1 Now at LCS Life Cycle Simulation GmbH, Backnang, Germany
Guide to sheets in this Excel workbook
		Product systems:	Summary of product systems used, incl. documentation of changes made
		Fuel shares:	Assumptions on technology and fuel shares in the energy system model (ESM) or through exogenously defined sub-technology scenarios
		Assignment to ESM techs:	Assignment of available product systems to technologies of the energy system model (ESM); not all product systems have been allocated to technologies in this study, but may be used in future studies
		Background electricity mixes:	Information on the technologies and electricity mixes of the the global scenario and the affected markets in ecoinvent

## Sheet: S1_Product systems
Technology	Product system	Functional unit product system	Source	Geographic location	Unchanged data set (ORG)	Newly created process that merges multiple construction data sets that were not previously merged in the LCI data (NCP)	No construction (NC)	No (original) fuel input (NF)				Deleted (direct) emission factors (except for NOx in H2 combustion) (DEF)	Additional explanations, i.e. changes compared to original data set or combinations of processes
Product system matched to generation activity of the ESM								Fossils	Electricity	Hydrogen	Biomass
Product system matched to construction activity of the ESM
power plants (w/o CHP)
Nuclear power plant I	electricity production, nuclear, pressure water reactor | electricity, high voltage | cut-off, U - NC	1 kWh	Ecoinvent v3.3 (Wernet et al., 2016)	DE			×						for nuclear fuel only
	market for nuclear power plant, pressure water reactor 1000MW | nuclear power plant, pressure water reactor 1000MW | cut-off, U - ORG	1000 MW	Ecoinvent v3.3 (Wernet et al., 2016)	GLO	×
Nuclear power plant II	electricity production, nuclear, boiling water reactor | electricity, high voltage | cut-off, U - NC	1 kWh	Ecoinvent v3.3 (Wernet et al., 2016)	DE			×						for nuclear fuel only
	market for nuclear power plant, boiling water reactor 1000MW | nuclear power plant, boiling water reactor 1000MW | cut-off, U - ORG	1000 MW	Ecoinvent v3.3 (Wernet et al., 2016)	GLO	×
Lignite power plant	electricity production, lignite | electricity, high voltage | cut-off, U - NC	1 kWh	Ecoinvent v3.3 (Wernet et al., 2016)	DE			×						for lignite only
	market for lignite power plant | lignite power plant | cut-off, U - ORG	380 MW	Ecoinvent v3.3 (Wernet et al., 2016)	GLO	×
Hard coal power plant	electricity production, hard coal | electricity, high voltage | cut-off, U - NC	1 kWh	Ecoinvent v3.3 (Wernet et al., 2016)	DE									for hard coal only
	market for hard coal power plant | hard coal power plant | cut-off, U - ORG	390 MW	Ecoinvent v3.3 (Wernet et al., 2016)	GLO
Gas power plant (steam turbine)	electricity production, natural gas, conventional power plant | electricity, high voltage | cut-off, U - NC	1 kWh	Ecoinvent v3.3 (Wernet et al., 2016)	DE			×						for fossil natural gas only
	electricity production, natural gas, conventional power plant | electricity, high voltage | cut-off, U - NC - NF	1 kWh	Ecoinvent v3.3 (Wernet et al., 2016)	DE			×	×					no input of fossil natural gas, used for admixture of synthetic CH4 and/or biogas
	electricity production, natural gas, conventional power plant | electricity, high voltage | cut-off, U - NC - NF - DEF	1 kWh	Ecoinvent v3.3 (Wernet et al., 2016)	DE			×	×				×	no input of fossil natural gas, used for admixture of H2
	market for gas power plant, 100MW electrical | gas power plant, 100MW electrical | cut-off, U - ORG	100 MW	Ecoinvent v3.3 (Wernet et al., 2016)	GLO	×
Gas power plant (gas turbine, 10 MW)	electricity production, natural gas, 10MW | electricity, high voltage | cut-off, U - NC	1 kWh	Ecoinvent v3.3 (Wernet et al., 2016)	DE			×						for fossil natural gas only
	electricity production, natural gas, 10MW | electricity, high voltage | cut-off, U - NC - NF	1 kWh	Ecoinvent v3.3 (Wernet et al., 2016)	DE			×	×					no input of fossil natural gas, used for admixture of synthetic CH4 and/or biogas
	electricity production, natural gas, 10MW | electricity, high voltage | cut-off, U - NC - NF - DEF	1 kWh	Ecoinvent v3.3 (Wernet et al., 2016)	DE			×	×				×	no input of fossil natural gas, used for admixture of H2
	market for gas turbine, 10MW electrical | gas turbine, 10MW electrical | cut-off, U - ORG	10 MW	Ecoinvent v3.3 (Wernet et al., 2016)	GLO	×
Gas power plant (combined cycle)	electricity production, natural gas, combined cycle power plant | electricity, high voltage | cut-off, U - NC	1 kWh	Ecoinvent v3.3 (Wernet et al., 2016)	DE			×						for fossil natural gas only
	electricity production, natural gas, combined cycle power plant | electricity, high voltage | cut-off, U - NC - NF	1 kWh	Ecoinvent v3.3 (Wernet et al., 2016)	DE			×	×					no input of fossil natural gas, used for admixture of synthetic CH4 and/or biogas
	electricity production, natural gas, combined cycle power plant | electricity, high voltage | cut-off, U - NC - NF - DEF	1 kWh	Ecoinvent v3.3 (Wernet et al., 2016)	DE			×	×				×	no input of fossil natural gas, used for admixture of H2
	market for gas power plant, combined cycle, 400MW electrical | gas power plant, combined cycle, 400MW electrical | cut-off, U - ORG	400 MW	Ecoinvent v3.3 (Wernet et al., 2016)	GLO	×
Oil power plant	electricity production, oil | electricity, high voltage | cut-off, U - NC	1 kWh	Ecoinvent v3.3 (Wernet et al., 2016)	DE
	market for oil power plant, 500MW | oil power plant, 500MW | cut-off, U - ORG	500 MW	Ecoinvent v3.3 (Wernet et al., 2016)	GLO
Biomass (20 MWel)	Kraftwerk (Dampfturbine mit 20 MWel), Waldrestholzhackschnitzel, ab Anlage - NC - NF	0,2778 kWh	BioEnergieDat (Schebek et al., 2013)	DE			×				×		no input of forest residue wood (Waldrestholz) as this process is accounted for in the bioenergy conversion sector
	hard coal power plant construction, 100MW | hard coal power plant | cut-off, U - ORG	100 MW	BioEnergieDat (Schebek et al., 2013)	GLO	×
Wind onshore	electricity production, wind, >3MW turbine, onshore | electricity, high voltage | cut-off, U - NC	1 kWh	Ecoinvent v3.3 (Wernet et al., 2016)	DE			×
	wind turbine construction, 4.5MW, onshore | wind turbine, 4.5MW, onshore | cut-off, U - ORG	4,5 MW	Ecoinvent v3.3 (Wernet et al., 2016)	GLO	×
Wind offshore	electricity production, wind, 1-3MW turbine, offshore | electricity, high voltage | cut-off, U - NC	1 kWh	Ecoinvent v3.3 (Wernet et al., 2016)	DE			×
	wind turbine construction, 2 MW, offshore | wind turbine, 2 MW , offshore | cut-off, U - NCP	2 MW	Ecoinvent v3.3 (Wernet et al., 2016)	GLO		×
PV rooftop (single-Si)	electricity production, photovoltaic, 3kWp slanted-roof installation, single-Si, panel, mounted | electricity, low voltage | cut-off, U - NC	1 kWh	Ecoinvent v3.3 (Wernet et al., 2016)	DE			×						in UVEK, there is no data for operation. Thus, the Ecoinvent data is used
	Market for single-Si rooftop power plants - ORG	0,001 MW	(UVEK, 2018)	DE	×
PV rooftop (multi-Si)	electricity production, photovoltaic, 3kWp slanted-roof installation, multi-Si, panel, mounted | electricity, low voltage | cut-off, U - NC	1 kWh	Ecoinvent v3.3 (Wernet et al., 2016)	DE			×
	Market for multi-Si rooftop power plants - ORG	0,001 MW	(UVEK, 2018)	DE	×
PV rooftop (thin film)	electricity production, photovoltaic, 3kWp slanted-roof installation, CIS, panel, mounted | electricity, low voltage | cut-off, U - NC	1 kWh	Ecoinvent v3.3 (Wernet et al., 2016)	DE			×						in UVEK, there is no data for operation. Thus, the Ecoinvent data is used
	Market for thin-film rooftop power plants - ORG	0,001 MW	(UVEK, 2018)	DE	×
PV open ground (CdTe)	electricity production, photovoltaic, 570kWp open ground installation, multi-Si | electricity, low voltage | cut-off, U - NC	1 kWh	Ecoinvent v3.3 (Wernet et al., 2016)	DE			×						in UVEK, there is no data for operation. Thus, the Ecoinvent data is used
	1.3 MWp open ground installation, CdTe, panel, on open ground/p/DE/I - ORG	1,3 MW	(UVEK, 2018)	DE	×
PV open ground (single-Si)	electricity production, photovoltaic, 570kWp open ground installation, multi-Si | electricity, low voltage | cut-off, U - NC	1 kWh	Ecoinvent v3.3 (Wernet et al., 2016)	DE			×						in UVEK, there is no data for operation. Thus, the Ecoinvent data is used
	1.3 MWp open ground installation, single-Si, panel, on open ground/p/DE/I - ORG	1,3 MW	(UVEK, 2018)	DE	×
PV open ground (multi-Si)	electricity production, photovoltaic, 570kWp open ground installation, multi-Si | electricity, low voltage | cut-off, U - NC	1 kWh	Ecoinvent v3.3 (Wernet et al., 2016)	DE			×						in UVEK, there is no data for operation. Thus, the Ecoinvent data is used
	1.3 MWp open ground installation, multi-Si, panel, on open ground/p/DE/I - ORG	1,3 MW	(UVEK, 2018)	DE	×
Geothermal	electricity production, deep geothermal | electricity, high voltage | cut-off, U - NC	1 kWh	Ecoinvent v3.3 (Wernet et al., 2016)	DE			×
	market for geothermal power plant, 5.5MWel | geothermal power plant, 5.5MWel | cut-off, U - ORG	5,5 MW	Ecoinvent v3.3 (Wernet et al., 2016)	GLO	×
Hydro power (reservoir)	electricity production, hydro, reservoir, non-alpine region | electricity, high voltage | cut-off, U - NC	1 kWh	Ecoinvent v3.3 (Wernet et al., 2016)	DE			×
	market for hydropower plant, reservoir, non-alpine regions | hydropower plant, reservoir, non-alpine regions | cut-off, U - ORG	9130 MW	Ecoinvent v3.3 (Wernet et al., 2016)	GLO	×								installed capacity not documented, estimate based on many assumptions
Hydro power (run-of-river)	electricity production, hydro, run-of-river | electricity, high voltage | cut-off, U - NC	1 kWh	Ecoinvent v3.3 (Wernet et al., 2016)	DE			×
	market for hydropower plant, run-of-river | hydropower plant, run-of-river | cut-off, U - ORG	5000 MW	Ecoinvent v3.3 (Wernet et al., 2016)	GLO	×								installed capacity not documented, estimate here based on many assumptions
CSP (Solar Tower)	Electricity production at 20 MW solar tower power plant (v3.5) - NC	1 kWh	Ecoinvent v3.5 (Wernet et al., 2016)	GLO			×						from ecoinvent v3.5
	Concentrated solar power tower plant construction 20 MW (v3.5) - ORG	20 MW	Ecoinvent v3.5 (Wernet et al., 2016)	GLO	×								from ecoinvent v3.5
CSP (Parabolrinne)	Electricity production for 50 MW parabolic trough power plant (v3.5) - NC	1 kWh	Ecoinvent v3.5 (Wernet et al., 2016)	GLO			×						from ecoinvent v3.5
	Concentrated solar power trough plant construction 50 MW (v3.5) - ORG	50 MW	Ecoinvent v3.5 (Wernet et al., 2016)	GLO	×								from ecoinvent v3.5
CHP plants
CHP lignite	heat and power co-generation, lignite | electricity, high voltage | cut-off, U - NC	1 kWh	Ecoinvent v3.3 (Wernet et al., 2016)	DE			×
	heat and power co-generation, lignite | heat, district or industrial, other than natural gas | cut-off, U - NC	0,2778 kWh	Ecoinvent v3.3 (Wernet et al., 2016)	DE			×
	market for lignite power plant | lignite power plant | cut-off, U - ORG	380 MW	Ecoinvent v3.3 (Wernet et al., 2016)	GLO	×
CHP hard coal	heat and power co-generation, hard coal | electricity, high voltage | cut-off, U - NC	1 kWh	Ecoinvent v3.3 (Wernet et al., 2016)	DE			×
	heat and power co-generation, hard coal | heat, district or industrial, other than natural gas | cut-off, U - NC	0,2778 kWh	Ecoinvent v3.3 (Wernet et al., 2016)	DE			×
	market for hard coal power plant | hard coal power plant | cut-off, U - ORG	390 MW	Ecoinvent v3.3 (Wernet et al., 2016)	GLO	×
CHP gas (50 kW)	heat and power co-generation, natural gas, 50kW electrical, lean burn | electricity, low voltage | cut-off, U - NC	1 kWh	Ecoinvent v3.3 (Wernet et al., 2016)	Europe without Switzerland			×						for fossil natural gas only
	heat and power co-generation, natural gas, 50kW electrical, lean burn | electricity, low voltage | cut-off, U - NC - NF	1 kWh	Ecoinvent v3.3 (Wernet et al., 2016)	Europe without Switzerland			×	×					no input of fossil natural gas, used for admixture of synthetic CH4 and/or biogas
	heat and power co-generation, natural gas, 50kW electrical, lean burn | electricity, low voltage | cut-off, U - NC - NF - DEF	1 kWh	Ecoinvent v3.3 (Wernet et al., 2016)	Europe without Switzerland			×	×				×	no input of fossil natural gas, used for admixture of H2
	heat and power co-generation, natural gas, 50kW electrical, lean burn | heat, central or small-scale, natural gas | cut-off, U - NC	0,2778 kWh	Ecoinvent v3.3 (Wernet et al., 2016)	Europe without Switzerland			×						for fossil natural gas only
	heat and power co-generation, natural gas, 50kW electrical, lean burn | heat, central or small-scale, natural gas | cut-off, U - NC - NF	0,2778 kWh	Ecoinvent v3.3 (Wernet et al., 2016)	Europe without Switzerland			×	×					no input of fossil natural gas, used for admixture of synthetic CH4 and/or biogas
	heat and power co-generation, natural gas, 50kW electrical, lean burn | heat, central or small-scale, natural gas | cut-off, U - NC - NF - DEF	0,2778 kWh	Ecoinvent v3.3 (Wernet et al., 2016)	Europe without Switzerland			×	×				×	no input of fossil natural gas, used for admixture of H2
	heat and power co-generation, natural gas, 50kW electrical, lean burn | cut-off, U - NCP	0,05 MW	Ecoinvent v3.3 (Wernet et al., 2016)	GLO		×
CHP gas (1 MW)	heat and power co-generation, natural gas, 1MW electrical, lean burn | electricity, high voltage | cut-off, U - NC	1 kWh	Ecoinvent v3.3 (Wernet et al., 2016)	Europe without Switzerland			×						for fossil natural gas only
	heat and power co-generation, natural gas, 1MW electrical, lean burn | electricity, high voltage | cut-off, U - NC - NF	1 kWh	Ecoinvent v3.3 (Wernet et al., 2016)	Europe without Switzerland			×	×					no input of fossil natural gas, used for admixture of synthetic CH4 and/or biogas
	heat and power co-generation, natural gas, 1MW electrical, lean burn | electricity, high voltage | cut-off, U - NC - NF - DEF	1 kWh	Ecoinvent v3.3 (Wernet et al., 2016)	Europe without Switzerland			×	×				×	no input of fossil natural gas, used for admixture of H2
	heat and power co-generation, natural gas, 1MW electrical, lean burn | heat, district or industrial, natural gas | cut-off, U - NC	0,2778 kWh	Ecoinvent v3.3 (Wernet et al., 2016)	Europe without Switzerland			×						for fossil natural gas only
	heat and power co-generation, natural gas, 1MW electrical, lean burn | heat, district or industrial, natural gas | cut-off, U - NC - NF	0,2778 kWh	Ecoinvent v3.3 (Wernet et al., 2016)	Europe without Switzerland			×	×					no input of fossil natural gas, used for admixture of synthetic CH4 and/or biogas
	heat and power co-generation, natural gas, 1MW electrical, lean burn | heat, district or industrial, natural gas | cut-off, U - NC - NF - DEF	0,2778 kWh	Ecoinvent v3.3 (Wernet et al., 2016)	Europe without Switzerland			×	×				×	no input of fossil natural gas, used for admixture of H2
	heat and power co-generation, 1MW electrical, lean burn | cut-off, U - NCP	1 MW	Ecoinvent v3.3 (Wernet et al., 2016)	GLO		×
CHP gas (100 MW)	heat and power co-generation, natural gas, conventional power plant, 100MW electrical | electricity, high voltage | cut-off, U - NC	1 kWh	Ecoinvent v3.3 (Wernet et al., 2016)	DE			×						for fossil natural gas only
	heat and power co-generation, natural gas, conventional power plant, 100MW electrical | electricity, high voltage | cut-off, U - NC - NF	1 kWh	Ecoinvent v3.3 (Wernet et al., 2016)	DE			×	×					no input of fossil natural gas, used for admixture of synthetic CH4 and/or biogas
	heat and power co-generation, natural gas, conventional power plant, 100MW electrical | electricity, high voltage | cut-off, U - NC - NF - DEF	1 kWh	Ecoinvent v3.3 (Wernet et al., 2016)	DE			×	×				×	no input of fossil natural gas, used for admixture of H2
	heat and power co-generation, natural gas, conventional power plant, 100MW electrical | heat, district or industrial, natural gas | cut-off, U - NC	0,2778 kWh	Ecoinvent v3.3 (Wernet et al., 2016)	DE			×						for fossil natural gas only
	heat and power co-generation, natural gas, conventional power plant, 100MW electrical | heat, district or industrial, natural gas | cut-off, U - NC - NF	0,2778 kWh	Ecoinvent v3.3 (Wernet et al., 2016)	DE			×	×					no input of fossil natural gas, used for admixture of synthetic CH4 and/or biogas
	heat and power co-generation, natural gas, conventional power plant, 100MW electrical | heat, district or industrial, natural gas | cut-off, U - NC - NF - DEF	0,2778 kWh	Ecoinvent v3.3 (Wernet et al., 2016)	DE			×	×				×	no input of fossil natural gas, used for admixture of H2
	market for gas power plant, 100MW electrical | gas power plant, 100MW electrical | cut-off, U - ORG	100 MW	Ecoinvent v3.3 (Wernet et al., 2016)	GLO		×
CHP gas (400 MW)	heat and power co-generation, natural gas, combined cycle power plant, 400MW electrical | electricity, high voltage | cut-off, U - NC	1 kWh	Ecoinvent v3.3 (Wernet et al., 2016)	DE			×						for fossil natural gas only
	heat and power co-generation, natural gas, combined cycle power plant, 400MW electrical | electricity, high voltage | cut-off, U - NC - NF	1 kWh	Ecoinvent v3.3 (Wernet et al., 2016)	DE			×	×					no input of fossil natural gas, used for admixture of synthetic CH4 and/or biogas
	heat and power co-generation, natural gas, combined cycle power plant, 400MW electrical | electricity, high voltage | cut-off, U - NC - NF - DEF	1 kWh	Ecoinvent v3.3 (Wernet et al., 2016)	DE			×	×				×	no input of fossil natural gas, used for admixture of H2
	heat and power co-generation, natural gas, combined cycle power plant, 400MW electrical | heat, district or industrial, natural gas | cut-off, U - NC	0,2778 kWh	Ecoinvent v3.3 (Wernet et al., 2016)	DE			×						for fossil natural gas only
	heat and power co-generation, natural gas, combined cycle power plant, 400MW electrical | heat, district or industrial, natural gas | cut-off, U - NC - NF	0,2778 kWh	Ecoinvent v3.3 (Wernet et al., 2016)	DE			×	×					no input of fossil natural gas, used for admixture of synthetic CH4 and/or biogas
	heat and power co-generation, natural gas, combined cycle power plant, 400MW electrical | heat, district or industrial, natural gas | cut-off, U - NC - NF - DEF	0,2778 kWh	Ecoinvent v3.3 (Wernet et al., 2016)	DE			×	×				×	no input of fossil natural gas, used for admixture of H2
	market for gas power plant, combined cycle, 400MW electrical | gas power plant, combined cycle, 400MW electrical | cut-off, U - ORG	400 MW	Ecoinvent v3.3 (Wernet et al., 2016)	GLO	×
CHP gas (PEM FC)	natural gas, burned in polymer electrolyte membrane fuel cell 2kWe, future | electricity, low voltage | cut-off, U - NC	1 kWh	Ecoinvent v3.3 (Wernet et al., 2016)	CH			×						for fossil natural gas only
	natural gas, burned in polymer electrolyte membrane fuel cell 2kWe, future | electricity, low voltage | cut-off, U - NC - NF	1 kWh	Ecoinvent v3.3 (Wernet et al., 2016)	CH			×	×					no input of fossil natural gas, used for admixture of synthetic CH4 and/or biogas
	natural gas, burned in polymer electrolyte membrane fuel cell 2kWe, future | electricity, low voltage | cut-off, U - NC - NF - DEF	1 kWh	Ecoinvent v3.3 (Wernet et al., 2016)	CH			×	×				×	no input of fossil natural gas, used for admixture of H2
	natural gas, burned in polymer electrolyte membrane fuel cell 2kWe, future | heat, future | cut-off, U - NC	0,2778 kWh	Ecoinvent v3.3 (Wernet et al., 2016)	CH			×						for fossil natural gas only
	natural gas, burned in polymer electrolyte membrane fuel cell 2kWe, future | heat, future | cut-off, U - NC - NF	0,2778 kWh	Ecoinvent v3.3 (Wernet et al., 2016)	CH			×	×					no input of fossil natural gas, used for admixture of synthetic CH4 and/or biogas
	natural gas, burned in polymer electrolyte membrane fuel cell 2kWe, future | heat, future | cut-off, U - NC - NF - DEF	0,2778 kWh	Ecoinvent v3.3 (Wernet et al., 2016)	CH			×	×				×	no input of fossil natural gas, used for admixture of H2
	polymer electrolyte membrane fuel cell 2kWe, future | cut-off, U - NCP	0,002 MW	Ecoinvent v3.3 (Wernet et al., 2016)	GLO		×
CHP gas (SOFC)	natural gas, burned in solid oxide fuel cell 125kWe, future | electricity, low voltage | cut-off, U - NC	1 kWh	Ecoinvent v3.3 (Wernet et al., 2016)	CH			×						for fossil natural gas only
	natural gas, burned in solid oxide fuel cell 125kWe, future | electricity, low voltage | cut-off, U - NC - NF	1 kWh	Ecoinvent v3.3 (Wernet et al., 2016)	CH			×	×					no input of fossil natural gas, used for admixture of synthetic CH4 and/or biogas
	natural gas, burned in solid oxide fuel cell 125kWe, future | electricity, low voltage | cut-off, U - NC - NF - DEF	1 kWh	Ecoinvent v3.3 (Wernet et al., 2016)	CH			×	×				×	no input of fossil natural gas, used for admixture of H2
	natural gas, burned in solid oxide fuel cell 125kWe, future | heat, future | cut-off, U - NC	0,2778 kWh	Ecoinvent v3.3 (Wernet et al., 2016)	CH			×						for fossil natural gas only
	natural gas, burned in solid oxide fuel cell 125kWe, future | heat, future | cut-off, U - NC - NF	0,2778 kWh	Ecoinvent v3.3 (Wernet et al., 2016)	CH			×	×					no input of fossil natural gas, used for admixture of synthetic CH4 and/or biogas
	natural gas, burned in solid oxide fuel cell 125kWe, future | heat, future | cut-off, U - NC - NF - DEF	0,2778 kWh	Ecoinvent v3.3 (Wernet et al., 2016)	CH			×	×				×	no input of fossil natural gas, used for admixture of H2
	solid oxide fuel cell 125kWe, future | cut-off, U - NCP	0,125 MW	Ecoinvent v3.3 (Wernet et al., 2016)	GLO		×
CHP biogas (100 kW, substrate 1)	BHKW (Gasmotor) 100 kWel Mais (90), Rindergülle (10), ab Anlage - NC - NF	1 kWh	BioEnergieDat (Schebek et al., 2013)	DE			×				×		no biogas input as this process is accounted for in the bioenergy conversion sector, heat and power output not separated; the naming of elementary and input-related product flows has been replaced by the naming of flows in ecoinvent v3.3; the spatial allocation of the chosen unit process corresponds to the frame conditions of Germany; for plant cultivation the humus balance was completed. Two par…
	heat and power co-generation unit construction, 1MW electrical | cut-off, U - NCP	1 MW	BioEnergieDat (Schebek et al., 2013)	GLO		×
CHP biogas (250 kW, substrate 2)	BHKW (Gasmotor) 250 kWel Mais (60), Gras (30), Rindergülle (10), ab Anlage - NC - NF	1 kWh	BioEnergieDat (Schebek et al., 2013)	DE			×				×		no biogas input as this process is accounted for in the bioenergy conversion sector, heat and power output not separated; the naming of elementary and input-related product flows has been replaced by the naming of flows in ecoinvent v3.3; the spatial allocation of the chosen unit process corresponds to the frame conditions of Germany; for plant cultivation the humus balance was completed. Two par…
	heat and power co-generation unit construction, 1MW electrical | cut-off, U - NCP	1 MW	BioEnergieDat (Schebek et al., 2013)	GLO		×
CHP biogas (500 kW, substrate 1)	BHKW (Gasmotor) 500 kWel Mais (90), Rindergülle (10), ab Anlage - NC - NF	1 kWh	BioEnergieDat (Schebek et al., 2013)	DE			×				×		no biogas input as this process is accounted for in the bioenergy conversion sector, heat and power output not separated; the naming of elementary and input-related product flows has been replaced by the naming of flows in ecoinvent v3.3; the spatial allocation of the chosen unit process corresponds to the frame conditions of Germany; for plant cultivation the humus balance was completed. Two par…
	heat and power co-generation unit construction, 1MW electrical | cut-off, U - NCP	1 MW	BioEnergieDat (Schebek et al., 2013)	GLO		×
CHP wood gas (2 MW)	Holzgas (FICFB Vergaser) BHKW 2 MWel, ab Anlage - NC - NF	0,2778 kWh	BioEnergieDat (Schebek et al., 2013)	DE			×				×		no wood gas input as this process is accounted for in the bioenergy conversion sector, heat and power output not separated; the naming of elementary and input-related product flows has been replaced by the naming of flows in ecoinvent v3.3; the spatial allocation of the chosen unit process corresponds to the frame conditions of Germany; the plant manufacturing is added
	heat and power co-generation unit construction, 1MW electrical | cut-off, U - NCP	1 MW	BioEnergieDat (Schebek et al., 2013)	GLO		×
CHP biomass (3 kW)	wood pellets, burned in stirling heat and power co-generation unit, 3kW electrical, future | electricity, low voltage | cut-off, U - NC - NF	1 kWh	Ecoinvent v3.3 (Wernet et al., 2016)	CH			×				×		no biomass input as this process is accounted for in the bioenergy conversion sector
	wood pellets, burned in stirling heat and power co-generation unit, 3kW electrical, future | heat, future | cut-off, U - NC - NF	0,2778 kWh	Ecoinvent v3.3 (Wernet et al., 2016)	CH			×				×		no biomass input as this process is accounted for in the bioenergy conversion sector
	wood pellets, burned in stirling heat and power co-generation unit, 3kW electrical, future | cut-off, U - NCP	0,003 MW	Ecoinvent v3.3 (Wernet et al., 2016)	GLO		×
CHP biomass (2 MW)	heat and power co-generation, wood chips, 2000 kW, state-of-the-art 2014 | electricity, high voltage | cut-off, U - NC - NF	1 kWh	Ecoinvent v3.3 (Wernet et al., 2016)	CH			×				×		no biomass input as this process is accounted for in the bioenergy conversion sector
	heat and power co-generation, wood chips, 2000 kW, state-of-the-art 2014 | heat, district or industrial, other than natural gas | cut-off, U - NC - NF	0,2778 kWh	Ecoinvent v3.3 (Wernet et al., 2016)	CH			×				×		no biomass input as this process is accounted for in the bioenergy conversion sector
	heat and power co-generation, wood chips, 2000 kW, state-of-the-art 2014 | cut-off, U - NCP	2 MW	Ecoinvent v3.3 (Wernet et al., 2016)	GLO		×
CHP biomass (6,67 MW)	heat and power co-generation, wood chips, 6667 kW, state-of-the-art 2014 | electricity, high voltage | cut-off, U - NC - NF	1 kWh	Ecoinvent v3.3 (Wernet et al., 2016)	DE			×				×		no biomass input as this process is accounted for in the bioenergy conversion sector
	heat and power co-generation, wood chips, 6667 kW, state-of-the-art 2014 | heat, district or industrial, other than natural gas | cut-off, U - NC - NF	0,2778 kWh	Ecoinvent v3.3 (Wernet et al., 2016)	DE			×				×		no biomass input as this process is accounted for in the bioenergy conversion sector
	heat and power co-generation, wood chips, 6667 kW | cut-off, U - NCP	6,667 MW	Ecoinvent v3.3 (Wernet et al., 2016)	GLO		×
Storage (electricity, heat, gas) and Grid
PHS	electricity production, hydro, pumped storage | electricity, high voltage | cut-off, U - nur Betrieb, ohne Strom-Input - NC - NF	1 kWh	Ecoinvent v3.3 (Wernet et al., 2016)	DE			×		×				no electricity as electricity production is accounted for in the power sector
	market for hydropower plant, reservoir, non-alpine regions | hydropower plant, reservoir, non-alpine regions | cut-off, U - ORG	9130 MW	Ecoinvent v3.3 (Wernet et al., 2016)	GLO	×
AA-CAES	adiabatic compressed air energy storage system | cut-off, U - ORG	150 MW	(Bouman et al., 2016)	DE	×
CAES	electricity production, compressed air energy storage system - Betrieb ohne Strominput - NC - NF	1 kWh	(Bouman et al., 2016)	DE			×		×				no electricity as electricity production is accounted for in the power sector
	compressed air energy storage system - ORG	200 MW	(Bouman et al., 2016)	DE	×
Battery (Lead Acid)	battery production, PbA (27 Wh), rechargeable - ORG	0,027 kWh	(Spanos et al., 2015)	DE	×
Battery (Li-Ion)	market for battery, Li-ion, rechargeable, prismatic | battery, Li-ion, rechargeable, prismatic | cut-off, U - ORG	2,1 kWh	Ecoinvent v3.3 (Wernet et al., 2016)	GLO	×
Battery (LFP-LTO)	Battery module, 26kWh, LFP-LTO, rack mounted, for stationary batt storage - ORG	26 kWh	(Peters and Weil, 2017)	DE	×
Battery (VRFB)	VRFB Battery module 1MW/8MWh, converter - ORG	1 MW	(Weber et al., 2018)	DE	×
	VRFB Battery module 1MW/8MWh, storage - ORG	8000 kWh	(Weber et al., 2018)	DE	×
Conversion sector (biofuels, biogases, P2G, P2L)
Biogas plant I	Fermenter, Nachgärer, abgedecktes Gärrestelager [100 kWel Mais (90), Rindergülle (10)], Biogas ab Anlage - NC	0,2778 kWh	BioEnergieDat (Schebek et al., 2013)	DE			×						no efficiency adjustment is made for biomass conversion processes; the naming of elementary and input-related product flows has been replaced by the naming of flows in ecoinvent v3.3; the spatial allocation of the chosen unit process corresponds to the frame conditions of Germany; the plant manufacturing is added
	Fermenter, Nachgärer, abgedecktes Gärrestelager [100 kWel Mais (90), Rindergülle (10)], Biogas ab Anlage - ORG	0,2778 kWh	BioEnergieDat (Schebek et al., 2013)	DE	×								no efficiency adjustment is made for biomass conversion processes; the naming of elementary and input-related product flows has been replaced by the naming of flows in ecoinvent v3.3; the spatial allocation of the chosen unit process corresponds to the frame conditions of Germany; the plant manufacturing is added
	Fermenter, Nachgärer, abgedecktes Gärrestelager, Bau Fermenter-Anlage 100 kW - ORG	0,242 MW	BioEnergieDat (Schebek et al., 2013)	DE	×
Biogas plant II	Fermenter, Nachgärer, abgedecktes Gärrestelager [250 kWel Mais (60), Gras (30), Rindergülle (10)], Biogas ab Anlage - NC	0,2778 kWh	BioEnergieDat (Schebek et al., 2013)	DE			×						no efficiency adjustment is made for biomass conversion processes; the naming of elementary and input-related product flows has been replaced by the naming of flows in ecoinvent v3.3; the spatial allocation of the chosen unit process corresponds to the frame conditions of Germany; the plant manufacturing is added
	Fermenter, Nachgärer, abgedecktes Gärrestelager [250 kWel Mais (60), Gras (30), Rindergülle (10)], Biogas ab Anlage - ORG	0,2778 kWh	BioEnergieDat (Schebek et al., 2013)	DE	×								no efficiency adjustment is made for biomass conversion processes; the naming of elementary and input-related product flows has been replaced by the naming of flows in ecoinvent v3.3; the spatial allocation of the chosen unit process corresponds to the frame conditions of Germany; the plant manufacturing is added
	Fermenter, Nachgärer, abgedecktes Gärrestelager, Bau Fermenter-Anlage 250 kW - ORG	0,602 MW	BioEnergieDat (Schebek et al., 2013)	DE	×
Biogas plant III	Fermenter, Nachgärer, abgedecktes Gärrestelager [500 kWel Mais (90), Rindergülle (10)], Biogas ab Anlage (JB) - NC	0,2778 kWh	BioEnergieDat (Schebek et al., 2013)	DE			×						no efficiency adjustment is made for biomass conversion processes; the naming of elementary and input-related product flows has been replaced by the naming of flows in ecoinvent v3.3; the spatial allocation of the chosen unit process corresponds to the frame conditions of Germany; the plant manufacturing is added
	Fermenter, Nachgärer, abgedecktes Gärrestelager [500 kWel Mais (90), Rindergülle (10)], Biogas ab Anlage (JB) - ORG	0,2778 kWh	BioEnergieDat (Schebek et al., 2013)	DE	×								no efficiency adjustment is made for biomass conversion processes; the naming of elementary and input-related product flows has been replaced by the naming of flows in ecoinvent v3.3; the spatial allocation of the chosen unit process corresponds to the frame conditions of Germany; the plant manufacturing is added
	Fermenter, Nachgärer, abgedecktes Gärrestelager, Bau Fermenter-Anlage 500 kW - ORG	1,2 MW	BioEnergieDat (Schebek et al., 2013)	DE	×
Biogas plant IV	Biogasherstellung - NC	5,48 kWh	SYSEET (UBA, 2020)	DE			×						no efficiency adjustment is made for biomass conversion processes
	Biogasherstellung - ORG	5,48 kWh	SYSEET (UBA, 2020)	DE	×								no efficiency adjustment is made for biomass conversion processes
	Biogasherstellung, Bau der Anlage - ORG	7,43 MW	SYSEET (UBA, 2020)	DE	×
Wood gas plant	Vergaser (FICFB) 8 MW, Waldrestholz (Fichte, Wassergehalt 35%), Holzgas ab Anlage (JB) - NC	0,2778 kWh	BioEnergieDat (Schebek et al., 2013)	DE			×						no efficiency adjustment is made for biomass conversion processes; the naming of elementary and input-related product flows has been replaced by the naming of flows in ecoinvent v3.3; the spatial allocation of the chosen unit process corresponds to the frame conditions of Germany
	market for synthetic gas factory | synthetic gas factory | cut-off, U - ORG	2,05 MW	Ecoinvent v3.3 (Wernet et al., 2016)	GLO	×
Biogas upgrading	Biogas upgrading Pressure swing adsorption (PSA) - NC	5,27 kWh	SYSEET (UBA, 2020)	DE			×						no efficiency adjustment is made for biomass conversion processes
	Biogas upgrading Pressure swing adsorption (PSA) - ORG	7,37 MW	SYSEET (UBA, 2020)	DE	×
BtL plant	Vergaser (CHOREN Carbo-V®) 500 MW, BtL, Waldrestholz (Fichte), ab Anlage - NC	0,2778 kWh	BioEnergieDat (Schebek et al., 2013)	DE			×						no efficiency adjustment is made for biomass conversion processes; the naming of elementary and input-related product flows has been replaced by the naming of flows in ecoinvent v3.3; the spatial allocation of the chosen unit process corresponds to the frame conditions of Germany; the plant manufacturing is added
	Bau BTL-Anlage (CHOREN) - NCP	500 MW	BioEnergieDat (Schebek et al., 2013)	DE		×
Bioliq	Synthesis (steel_balls_O2_fuel_diesel_via_FT)_2015 - NC	359169,444 kWh	(Haase and Rösch, 2019), own assumptions	DE			×						no efficiency adjustment is made for biomass conversion processes
	Construction Bioliq plant - NCP	455,799 MW	(Haase and Rösch, 2019), own assumptions	DE		×
Bioethanol production I	ethanol production from grass | ethanol, without water, in 95% solution state, from fermentation | cut-off, U - ORG	7,43 kWh	Ecoinvent v3.3 (Wernet et al., 2016)	CH	×								no efficiency adjustment is made for biomass conversion processes
	ethanol production from grass | ethanol, without water, in 95% solution state, from fermentation | cut-off, U - NC	7,43 kWh	Ecoinvent v3.3 (Wernet et al., 2016)	CH			×						no efficiency adjustment is made for biomass conversion processes
	ethanol fermentation plant | cut-off, U - NCP	27,2 MW	Ecoinvent v3.3 (Wernet et al., 2016)	GLO		×
Bioethanol production II	Bioethanol Produktion aus Winterweizen (Wassergehalt 17%), ab Anlage - ORG	0,2778 kWh	BioEnergieDat (Schebek et al., 2013)	DE	×								data set does not take into account the construction of the plant, but only the operation; no efficiency adjustment is made for biomass conversion processes; the naming of elementary and input-related product flows has been replaced by the naming of flows in ecoinvent v3.3; the spatial allocation of the chosen unit process corresponds to the frame conditions of Germany; for plant cultivation the …
Biodiesel production I	esterification of rape oil | vegetable oil methyl ester | cut-off, U - ORG	10,28 kWh	Ecoinvent v3.3 (Wernet et al., 2016)	Europe without Switzerland	×								no separation of construction and operation necessary because technology is not included in the ESM; no efficiency adjustment is made for biomass conversion processes
Biodiesel production II	esterification of palm oil | vegetable oil methyl ester | cut-off, U - ORG	10,28 kWh	Ecoinvent v3.3 (Wernet et al., 2016)	RoW	×								no separation of construction and operation necessary because technology is not included in the ESM; no efficiency adjustment is made for biomass conversion processes
Biodiesel production III	esterification of soybean oil | vegetable oil methyl ester | cut-off, U - ORG	10,28 kWh	Ecoinvent v3.3 (Wernet et al., 2016)	RoW	×								data set does not take into account the construction of the plant, but only the operation; no efficiency adjustment is made for biomass conversion processes
Biodiesel production IV	Rapsmethylester Produktion (Umesterung von Rapsöl (raffiniert)), ab Produktionsanlage - ORG	0,2778 kWh	BioEnergieDat (Schebek et al., 2013)	DE	×								data set does not take into account the construction of the plant, but only the operation; no efficiency adjustment is made for biomass conversion processes; the naming of elementary and input-related product flows has been replaced by the naming of flows in ecoinvent v3.3; the spatial allocation of the chosen unit process corresponds to the frame conditions of Germany; for plant cultivation the …
Short rotation plantation	Kurzumtriebsplantagenhackschnitzel (Weide, Wassergehalt 35%) Transport, frei BtL Anlage - ORG	3,509 kWh	BioEnergieDat (Schebek et al., 2013)	DE	×								no separation of construction and operation necessary because technology is not included in the ESM; no efficiency adjustment is made for biomass conversion processes; the naming of elementary and input-related product flows has been replaced by the naming of flows in ecoinvent v3.3; the spatial allocation of the chosen unit process corresponds to the frame conditions of Germany
Straw I	Weizenstrohballen Transport, frei Konversionsanlage - ORG	3,972 kWh	BioEnergieDat (Schebek et al., 2013)	DE	×								no separation of construction and operation necessary because technology is not included in the ESM; no efficiency adjustment is made for biomass conversion processes; the naming of elementary and input-related product flows has been replaced by the naming of flows in ecoinvent v3.3; the spatial allocation of the chosen unit process corresponds to the frame conditions of Germany; for plant cultiv…
Straw II	market for straw, organic | straw, organic | cut-off, U - ORG	4,889 kWh	Ecoinvent v3.3 (Wernet et al., 2016)	GLO	×								no separation of construction and operation necessary because technology is not included in the ESM; no efficiency adjustment is made for biomass conversion processes
Forest residue wood	Waldrestholz Hackschnitzel (Fichte, Wassergehalt 35%) Transport, frei Anlage - ORG	3,63 kWh	BioEnergieDat (Schebek et al., 2013)	DE	×								no separation of construction and operation necessary because technology is not included in the ESM; no efficiency adjustment is made for biomass conversion processes; the naming of elementary and input-related product flows has been replaced by the naming of flows in ecoinvent v3.3; the spatial allocation of the chosen unit process corresponds to the frame conditions of Germany
Wood pellets I	market for wood pellet | wood pellet, measured as dry mass | cut-off, U - ORG	3,63 kWh	Ecoinvent v3.3 (Wernet et al., 2016)	RER	×								no separation of construction and operation necessary because technology is not included in the ESM; no efficiency adjustment is made for biomass conversion processes
Wood pellets II	Pelletauslieferung, A1 Holzpellets (9% Wassergehalt), frei Haus - ORG	4,81 kWh	BioEnergieDat (Schebek et al., 2013)	DE	×								no separation of construction and operation necessary because technology is not included in the ESM; no efficiency adjustment is made for biomass conversion processes; ; the naming of elementary and input-related product flows has been replaced by the naming of flows in ecoinvent v3.3; the spatial allocation of the chosen unit process corresponds to the frame conditions of Germany
Wood chips	market for wood chips, wet, measured as dry mass | wood chips, wet, measured as dry mass | cut-off, U - ORG	5,218 kWh	Ecoinvent v3.3 (Wernet et al., 2016)	Europe without Switzerland	×								no separation of construction and operation necessary because technology is not included in the ESM; no efficiency adjustment is made for biomass conversion processes
Split wood	market for cleft timber, measured as dry mass | cleft timber, measured as dry mass | cut-off, U - ORG	4,333 kWh	Ecoinvent v3.3 (Wernet et al., 2016)	Europe without Switzerland	×								no separation of construction and operation necessary because technology is not included in the ESM; no efficiency adjustment is made for biomass conversion processes
Electrolyzer	Betrieb Elektrolyse - NC - NF	33,33 kWh	(Koj et al., 2017)	DE			×		×
	Bau Elektrolyse - ORG	0,5 MW	(Koj et al., 2017)	DE	×
Methanization	Synthetic Natural Gas (based on DAC) - NC - NF	11,1 kWh	SYSEET (UBA, 2020)	DE			×			×			no efficiency adjustment is made for synfuel conversion processes
	synthetic gas factory construction including DAC | synthetic gas factory | cut-off, U - ORG	2,232 MW	Ecoinvent v3.3 (Wernet et al., 2016)	GLO	×
Synfuels (FT-BtL)	Synthetic Fuels - FT-BtL (Fischer-Tropsch Biomass-to-Liquid) - NC - NF	11,14 kWh	SYSEET (UBA, 2020)	DE			×				×		no efficiency adjustment is made for biomass conversion processes
	Synthetic Fuels - FT-BtL (Fischer Tropsch Biomass-to-Liquid) - ORG	29,25 MW	SYSEET (UBA, 2020)	DE	×
Synfuels (FT-PBtL)	Synthetic Fuels - FT-PBtL (Fischer-Tropsch Power-and-Biomass-to-Liquid) - NC - NF	11,14 kWh	SYSEET (UBA, 2020)	DE			×		×		×		no efficiency adjustment is made for biomass conversion processes
	Synthetic Fuels - FT-PBtL (Fischer Tropsch Power-and-Biomass-to-Liquid) - ORG	110,75 MW	SYSEET (UBA, 2020)	DE	×
Synfuels (FT-PtL MEA)	Synthetic Fuels - FT-PtL (Fischer-Tropsch Power-to-Liquid) MEA (amine-based shrubbing) - NC - NF	11,14 kWh	SYSEET (UBA, 2020)	DE			×		×				no efficiency adjustment is made for synfuel conversion processes
	Synthetic Fuels - FT-PtL (Fischer-Tropsch Power-to-Liquid) MEA (amine-based shrubbing) - ORG	81,91 MW	SYSEET (UBA, 2020)	DE	×
Synfuels (FT-PtL Selexol)	Synthetic Fuels - FT-PtL (Fischer-Tropsch Power-to-Liquid) Selexol - NC - NF	11,14 kWh	SYSEET (UBA, 2020)	DE			×		×				no efficiency adjustment is made for synfuel conversion processes
	Synthetic Fuels - FT-PtL (Fischer-Tropsch Power-to-Liquid) Selexol - ORG	81,91 MW	SYSEET (UBA, 2020)	DE	×
Heat generation (w/o CHP)
Coal burner (1-10 MW)	heat production, at hard coal industrial furnace 1-10MW | heat, district or industrial, other than natural gas | cut-off, U - NC	0,2778 kWh	Ecoinvent v3.3 (Wernet et al., 2016)				×
	market for industrial furnace, coal, 1-10MW | industrial furnace, coal, 1-10MW | cut-off, U - ORG	5 MW	Ecoinvent v3.3 (Wernet et al., 2016)	GLO	×
Gas burner (<100 kW, condensing)	heat production, natural gas, at boiler condensing modulating <100kW | heat, central or small-scale, natural gas | cut-off, U - NC	0,2778 kWh	Ecoinvent v3.3 (Wernet et al., 2016)	Europe without Switzerland			×						for fossil natural gas only
	heat production, natural gas, at boiler condensing modulating <100kW | heat, central or small-scale, natural gas | cut-off, U - NC - NF	0,2778 kWh	Ecoinvent v3.3 (Wernet et al., 2016)	Europe without Switzerland			×	×					no input of fossil natural gas, used for admixture of synthetic CH4 and/or biogas
	heat production, natural gas, at boiler condensing modulating <100kW | heat, central or small-scale, natural gas | cut-off, U - NC - NF - DEF	0,2778 kWh	Ecoinvent v3.3 (Wernet et al., 2016)	Europe without Switzerland			×	×				×	no input of fossil natural gas, used for admixture of H2
	market for gas boiler | gas boiler | cut-off, U - ORG	0,01 MW	Ecoinvent v3.3 (Wernet et al., 2016)	GLO	×
Gas burner (<100 kW)	heat production, natural gas, at boiler modulating <100kW | heat, central or small-scale, natural gas | cut-off, U - NC	0,2778 kWh	Ecoinvent v3.3 (Wernet et al., 2016)	Europe without Switzerland			×						for fossil natural gas only
	heat production, natural gas, at boiler modulating <100kW | heat, central or small-scale, natural gas | cut-off, U - NC - NF	0,2778 kWh	Ecoinvent v3.3 (Wernet et al., 2016)	Europe without Switzerland			×	×					no input of fossil natural gas, used for admixture of synthetic CH4 and/or biogas
	heat production, natural gas, at boiler modulating <100kW | heat, central or small-scale, natural gas | cut-off, U - NC - NF - DEF	0,2778 kWh	Ecoinvent v3.3 (Wernet et al., 2016)	Europe without Switzerland			×	×				×	no input of fossil natural gas, used for admixture of H2
	market for gas boiler | gas boiler | cut-off, U - ORG	0,01 MW	Ecoinvent v3.3 (Wernet et al., 2016)	GLO	×
Gas burner (>100 kW)	heat production, natural gas, at industrial furnace >100kW | heat, district or industrial, natural gas | cut-off, U - NC	0,2778 kWh	Ecoinvent v3.3 (Wernet et al., 2016)	Europe without Switzerland			×						for fossil natural gas only
	heat production, natural gas, at industrial furnace >100kW | heat, district or industrial, natural gas | cut-off, U - NC - NF	0,2778 kWh	Ecoinvent v3.3 (Wernet et al., 2016)	Europe without Switzerland			×	×					no input of fossil natural gas, used for admixture of synthetic CH4 and/or biogas
	heat production, natural gas, at industrial furnace >100kW | heat, district or industrial, natural gas | cut-off, U - NC - NF - DEF	0,2778 kWh	Ecoinvent v3.3 (Wernet et al., 2016)	Europe without Switzerland			×	×				×	no input of fossil natural gas, used for admixture of H2
	market for industrial furnace, natural gas | industrial furnace, natural gas | cut-off, U - ORG	1 MW	Ecoinvent v3.3 (Wernet et al., 2016)	GLO	×
Oil burner (10 kW)	heat production, light fuel oil, at boiler 10kW, non-modulating | heat, central or small-scale, other than natural gas | cut-off, U - NC	0,2778 kWh	Ecoinvent v3.3 (Wernet et al., 2016)	Europe without Switzerland			×
	heat production, light fuel oil, at boiler 10kW, non-modulating | cut-off, U - NCP	0,01 MW	Ecoinvent v3.3 (Wernet et al., 2016)	GLO
Oil burner (10 kW, condensing)	heat production, light fuel oil, at boiler 10kW condensing, non-modulating | heat, central or small-scale, other than natural gas | cut-off, U - NC	0,2778 kWh	Ecoinvent v3.3 (Wernet et al., 2016)	Europe without Switzerland			×
	market for oil boiler, 10kW | oil boiler, 10kW | cut-off, U - ORG	0,01 MW	Ecoinvent v3.3 (Wernet et al., 2016)	GLO	×
Oil burner (100 kW, condensing, non-modulating)	heat production, light fuel oil, at boiler 100kW condensing, non-modulating | heat, central or small-scale, other than natural gas | cut-off, U - NC	0,2778 kWh	Ecoinvent v3.3 (Wernet et al., 2016)	Europe without Switzerland			×
	heat production, light fuel oil, at boiler 10kW condensing, non-modulating | cut-off, U - NCP	0,01 MW	Ecoinvent v3.3 (Wernet et al., 2016)	GLO		×
Oil burner (1 MW)	heat production, light fuel oil, at industrial furnace 1MW | heat, district or industrial, other than natural gas | cut-off, U - NC	0,2778 kWh	Ecoinvent v3.3 (Wernet et al., 2016)	Europe without Switzerland			×
	heat production, light fuel oil, at industrial furnance 1MW | cut-off, U - NCP	1 MW	Ecoinvent v3.3 (Wernet et al., 2016)	GLO		×
Biomass (6kW, logs)	heat production, mixed logs, at wood heater 6kW, state-of-the-art 2014 | heat, central or small-scale, other than natural gas | cut-off, U - NC - NF	0,2778 kWh	Ecoinvent v3.3 (Wernet et al., 2016)	CH			×				×		no biomass input as this process is accounted for in the bioenergy conversion sector
	market for furnace, logs, 6kW | furnace, logs, 6kW | cut-off, U - ORG	0,006 MW	Ecoinvent v3.3 (Wernet et al., 2016)	GLO	×
Biomass (10kW, Pellets)	Pelletzentralheizung 10 kW, A1 Holzpellets, ab Anlage - NC - NF	0,2778 kWh	BioEnergieDat (Schebek et al., 2013)	DE			×				×		no biomass input as this process is accounted for in the bioenergy conversion sector; the naming of elementary and input-related product flows has been replaced by the naming of flows in ecoinvent v3.3; the spatial allocation of the chosen unit process corresponds to the frame conditions of Germany; the plant manufacturing is added
	Bau Kessel 10 kW - ORG	0,01 MW	BioEnergieDat (Schebek et al., 2013)	DE	×
Biomass (300 kW, straw)	heat production, straw, organic, at furnace 300kW | heat, district or industrial, other than natural gas | cut-off, U - NC - NF	0,2778 kWh	Ecoinvent v3.3 (Wernet et al., 2016)	GLO			×				×		no biomass input as this process is accounted for in the bioenergy conversion sector
	market for furnace, wood chips, hardwood storage area, 300kW | furnace, wood chips, hardwood storage area, 300kW | cut-off, U - ORG	0,3 MW	Ecoinvent v3.3 (Wernet et al., 2016)	GLO	×
Biomass (800 kW, Waldrestholz)	Hackschnitzel-Kessel 800 kW, Waldrestholz (Fichte), ab Anlage - NC - NF	0,2778 kWh	BioEnergieDat (Schebek et al., 2013)	DE			×				×		no biomass input as this process is accounted for in the bioenergy conversion sector the naming of elementary and input-related product flows has been replaced by the naming of flows in ecoinvent v3.3; the spatial allocation of the chosen unit process corresponds to the frame conditions of Germany; the plant manufacturing is added
	Bau Hackschnitzel-Kessel 800 kW - ORG	0,8 MW	BioEnergieDat (Schebek et al., 2013)	DE	×
Electric Heater	auxiliary heating unit production, electric, 5kW | auxiliary heating unit, electric, 5kW | cut-off, U - ORG	0,005 MW	Ecoinvent v3.3 (Wernet et al., 2016)	CH	×				×				no electricity input as electricity production is accounted for in the power sector
Electric heat pump (30 kW)	heat production, at heat pump 30kW, allocation exergy | heat, central or small-scale, other than natural gas | cut-off, U - NC - NF	0,2778 kWh	Ecoinvent v3.3 (Wernet et al., 2016)	Europe without Switzerland			×		×				no electricity input as electricity production is accounted for in the power sector
	market for heat pump, 30kW | heat pump, 30kW | cut-off, U - ORG	0,03 MW	Ecoinvent v3.3 (Wernet et al., 2016)	GlO	×
Electric heat pump (air, 10 kW)	heat, air heat pump 10 kW - NC - NF	0,2778 kWh	Greenings and Azapagic 2012	DE			×		×				no electricity input as electricity production is accounted for in the power sector; R134a is used as the working medium of the WP. The annual COP is 2.8 and comes from field test results (FAWA 2004).
	heat pump production, air, 10 kW - ORG	0,01 MW	Greenings and Azapagic 2012	DE	×								construction only; The 3% loss of coolant during the construction of the heat pump was included. All transports of materials used in the construction of the plant were also taken into account; the construction also includes all processes for installation
Electric heat pump (horizontal ground-source 10 kW)	heat, horizontal ground-source heat pump 10 kW - NC - NF	0,2778 kWh	Greenings and Azapagic 2012	DE			×		×				no electricity input as electricity production is accounted for in the power sector; R134a is used as the working medium of the WP. The annual COP is 3.5 and comes from field test results (FAWA 2004).
	heat pump production, ground-source horizontal, 10 kW - ORG	0,01 MW	Greenings and Azapagic 2012	DE	×								construction only; The 3% loss of coolant during the construction of the heat pump was included. All transports of materials used in the construction of the plant were also taken into account; the construction also includes all processes for installation
Electric heat pump (vertical ground-source 10 kW)	heat, vertical ground-source heat pump 10 kW - NC - NF	0,2778 kWh	Greenings and Azapagic 2012	DE			×		×				no electricity input as electricity production is accounted for in the power sector; r; R134a is used as the working medium of the WP. The annual COP is 3.5 and comes from field test results (FAWA 2004).
	heat pump production, ground-source vertical, 10 kW - ORG	0,01 MW	Greenings and Azapagic 2012	DE	×								construction only; The 3% loss of coolant during the construction of the heat pump was included. All transports of materials used in the construction of the plant were also taken into account; the construction also includes all processes for installation
Solar collector I	operation, solar collector system, Cu flat plate collector, one-family house, for combined system | heat, central or small-scale, other than natural gas | cut-off, U - NC	0,2778 kWh	Ecoinvent v3.3 (Wernet et al., 2016)	CH			×						no electricity input as electricity production is accounted for in the power sector
	market for solar collector system, Cu flat plate collector, one-family house, combined system | solar collector system, Cu flat plate collector, one-family house, combined system | cut-off, U - ORG	0,00861 MW	Ecoinvent v3.3 (Wernet et al., 2016)	GLO	×								construction only
Solar collector II	Wärmeerzeugung Flachkollektoren (Gebäude) - NC	0,2778 kWh	Arden (2017)	DE			×						The system contributes to covering 20% of the total heat demand (heating + hot water) of the building per year. The lifetime of the system is 20 years. During the use of the system, electricity is required to operate the circulating pump for the heat transfer medium and for the control system. The solar yield of the system refers to the gross collector area. The maintenance includes an inspection…
	Gesamtanlage Flachkollektor, verpackt - ORG	0,05959 MW	Arden (2017)	DE	×								This process maps the packaged flat plate collector system with a gross collector area of 85,131 m². This consists of the individual constructional elements piping, assembly kit, pump station, collector, storage tank and the packaging material.
Solar collector III	Wärmeerzeugung Vakuumröhrenkollektoren (Gebäude) - NC	0,2778 kWh	Arden (2017)	DE			×						The system contributes to covering 20% of the total heat demand (heating + hot water) of the building per year. The lifetime of the system is 20 years. During the use of the system, electricity is required to operate the circulating pump for the heat transfer medium and for the control system. The solar yield of the system refers to the gross collector area. The maintenance includes an inspection…
	Gesamtanlage Vakuumröhrenkollektor, verpackt - ORG	0,06174 MW	Arden (2017)	DE	×								This process maps the packaged flat plate collector system with a gross collector area of 85,131 m². This consists of the individual constructional elements piping, assembly kit, pump station, collector, storage tank and the packaging material.
Passenger transport
Passenger car - Diesel	transport, passenger car, medium size, diesel, EURO 5 | transport, passenger car, medium size, diesel, EURO 5 | cut-off, U - NC	1,5 pkm	Ecoinvent v3.3 (Wernet et al., 2016)	RER			×						for fossil diesel only
	transport, passenger car, medium size, diesel, EURO 5 | transport, passenger car, medium size, diesel, EURO 5 | cut-off, U - NC - NF	1,5 pkm	Ecoinvent v3.3 (Wernet et al., 2016)	RER			×				×		no input of fossil diesel, used for admixture of synthetic fuels and biofuels
	transport, passenger car, medium size, diesel, EURO 5 | transport, passenger car, medium size, diesel, EURO 5 | cut-off, U - NCP	1 qty	Ecoinvent v3.3 (Wernet et al., 2016)	GLO		×
Passenger car - Otto	transport, passenger car, medium size, petrol, EURO 5 | transport, passenger car, medium size, petrol, EURO 5 | cut-off, U - NC	1,5 pkm	Ecoinvent v3.3 (Wernet et al., 2016)	RER			×						for fossil petrol only
	transport, passenger car, medium size, petrol, EURO 5 | transport, passenger car, medium size, petrol, EURO 5 | cut-off, U - NC - NF	1,5 pkm	Ecoinvent v3.3 (Wernet et al., 2016)	RER			×				×		no input of fossil diesel, used for admixture of synthetic fuels and biofuels
	transport, passenger car, medium size, petrol, EURO 5 | transport, passenger car, medium size, petrol, EURO 5 | cut-off, U - NCP	1 qty	Ecoinvent v3.3 (Wernet et al., 2016)	GLO		×
Passenger car - Gas (CNG)	transport, passenger car, medium size, natural gas, EURO 5 | transport, passenger car, medium size, natural gas, EURO 5 | cut-off, U - NC	1,5 pkm	Ecoinvent v3.3 (Wernet et al., 2016)	RER			×						for fossil natural gas only
	transport, passenger car, medium size, natural gas, EURO 5 | transport, passenger car, medium size, natural gas, EURO 5 | cut-off, U - NC - NF	1,5 pkm	Ecoinvent v3.3 (Wernet et al., 2016)	RER			×				×		no input of fossil natural gas, used for admixture of synthetic fuels and biofuels
	transport, passenger car, medium size, natural gas, EURO 5 | transport, passenger car, medium size, natural gas, EURO 5 | cut-off, U - NC - NF - DEF	1,5 pkm	Ecoinvent v3.3 (Wernet et al., 2016)	RER			×				×	×	no input of fossil natural gas, used for admixture of H2
	transport, passenger car, medium size, natural gas, EURO 5 | transport, passenger car, medium size, natural gas, EURO 5 | cut-off, U - NCP	1 qty	Ecoinvent v3.3 (Wernet et al., 2016)	GLO		×
Passenger car - Gas (LPG)	transport, passenger car, medium size, liquefied petroleum gas (LPG), EURO 5 | transport, passenger car, medium size, liquefied petroleum gas, EURO 5 | cut-off, U - NC	1,5 pkm	Ecoinvent v3.3 (Wernet et al., 2016)	GLO			×						for fossil LPG only
	transport, passenger car, medium size, liquefied petroleum gas (LPG), EURO 5 | transport, passenger car, medium size, liquefied petroleum gas, EURO 5 | cut-off, U - NC - NF	1,5 pkm	Ecoinvent v3.3 (Wernet et al., 2016)	GLO			×	×					no input of fossil LPG, used for admixture of synthetic fuels and biofuels
	transport, passenger car, medium size, liquefied petroleum gas (LPG), EURO 5 | transport, passenger car, medium size, liquefied petroleum gas, EURO 5 | cut-off, U - NC - NF - DEF	1,5 pkm	Ecoinvent v3.3 (Wernet et al., 2016)	GLO			×	×				×	no input of fossil natural gas, used for admixture of H2
	transport, passenger car, medium size, liquefied petroleum gas (LPG), EURO 5 | transport, passenger car, medium size, liquefied petroleum gas, EURO 5 | cut-off, U - NCP	1 qty	Ecoinvent v3.3 (Wernet et al., 2016)	GLO		×
Passenger car - Diesel (PHEV)	transport, passenger car, medium size, diesel, EURO 5 | transport, passenger car, medium size, diesel, EURO 5 | cut-off, U - NC	1,5 pkm	Ecoinvent v3.3 (Wernet et al., 2016)	RER			×						for fossil diesel only
	transport, passenger car, medium size, diesel, EURO 5 | transport, passenger car, medium size, diesel, EURO 5 | cut-off, U - NC - NF	1,5 pkm	Ecoinvent v3.3 (Wernet et al., 2016)	RER			×	×					no input of fossil diesel, used for admixture of synthetic fuels and biofuels
	transport, passenger car, medium size, diesel, EURO 5 | transport, passenger car, medium size, diesel, EURO 5 | cut-off, U - NC - NF - DEF	1,5 pkm	Ecoinvent v3.3 (Wernet et al., 2016)	RER			×	×				×	operation electricity (no direct emisisons)
	transport, passenger car, medium size, diesel, EURO 5 | transport, passenger car, medium size, diesel, EURO 5 | cut-off, U | adapted to PHEV - NCP	1 qty	Ecoinvent v3.3 (Wernet et al., 2016), own modelling	GLO		×							Based on original dataset, added a LFP-TiO battery (8kWh) from (Peters and Weil, 2018) and the electric motor from (Benitez et al., 2020) with a maximal power of 100kW
Passenger car - Otto (PHEV)	transport, passenger car, medium size, petrol, EURO 5 | transport, passenger car, medium size, petrol, EURO 5 | cut-off, U - NC	1,5 pkm	Ecoinvent v3.3 (Wernet et al., 2016)	RER			×						for fossil petrol only
	transport, passenger car, medium size, petrol, EURO 5 | transport, passenger car, medium size, petrol, EURO 5 | cut-off, U - NC - NF	1,5 pkm	Ecoinvent v3.3 (Wernet et al., 2016)	RER			×	×					no input of fossil petrol, used for admixture of H2
	transport, passenger car, medium size, petrol, EURO 5 | transport, passenger car, medium size, petrol, EURO 5 | cut-off, U - NC - NF - DEF	1,5 pkm	Ecoinvent v3.3 (Wernet et al., 2016)	RER			×	×				×	operation electricity (no direct emisisons)
	transport, passenger car, medium size, petrol, EURO 5 | transport, passenger car, medium size, petrol, EURO 5 | cut-off, U | adapted to PHEV - NCP	1 qty	Ecoinvent v3.3 (Wernet et al., 2016), own modelling	GLO		×							based on original dataset, added the LFP-TiO battery (8kWh) from (Peters and Weil, 2018) and the electric motor from (Benitez et al., 2020) with a maximal power of 100kW
BEV	transport, passenger car, electric | transport, passenger car, electric | cut-off, U - NC - NF	1,5 pkm	Ecoinvent v3.3 (Wernet et al., 2016)	GLO			×		×				no electricity input as electricity production is accounted for in the power sector
	transport, passenger car, electric | transport, passenger car, electric | cut-off, U - NCP	1 qty	Ecoinvent v3.3 (Wernet et al., 2016), own modelling	GLO		×							based on original dataset, added the NCM-C battery (70kWh) from (Peters and Weil, 2018)
FCEV (current)	Fuel Cell Electric Vehicle (FCEV) (current) - NCP	1 qty	(Benitez et al., 2020)	DE		×
	Fuel Cell Electric Vehicle (FCEV) (current) - NC - NF	225000 pkm	(Benitez et al., 2020)	DE			×			×			operation only, no H2 input as H2 production os accounted for in the synfuel conversion sector
FCEV (future)	Fuel Cell Electric Vehicle (FCEV) (future) - NCP	1 qty	(Benitez et al., 2020)	DE		×
	Fuel Cell Electric Vehicle (FCEV) (future) - NC - NF	225000 pkm	(Benitez et al., 2020)	DE			×			×			operation only, no H2 input as H2 production os accounted for in the synfuel conversion sector
Electric bicycle	transport, passenger, electric bicycle, label-certified electricity | transport, passenger, electric bicycle, label-certified electricity | cut-off, U - NC - NF	1 pkm	Ecoinvent v3.3 (Wernet et al., 2016)	CH			×		×				no electricity input as electricity production is accounted for in the power sector
	transport, passenger, electric bicycle, label-certified electricity | transport, passenger, electric bicycle, label-certified electricity | cut-off, U - ORG	1 qty	Ecoinvent v3.3 (Wernet et al., 2016)	GLO	×
Motor scooter (gasoline)	transport, passenger, motor scooter | transport, passenger, motor scooter | cut-off, U - NC	1,1 pkm	Ecoinvent v3.3 (Wernet et al., 2016)	CH			×						for fossil petrol only
	transport, passenger, motor scooter | transport, passenger, motor scooter | cut-off, U - NC - NF - DEF	1,1 pkm	Ecoinvent v3.3 (Wernet et al., 2016)	CH			×				×	×	no input of fossil gasoline, used for admixture of synthetic fuels and biofuels
	transport, passenger, motor scooter | transport, passenger, motor scooter | cut-off, U - NC - NF	1,1 pkm	Ecoinvent v3.3 (Wernet et al., 2016)	CH			×				×		no fossil petrol
	transport, passenger, motor scooter | transport, passenger, motor scooter | cut-off, U - ORG	1 qty	Ecoinvent v3.3 (Wernet et al., 2016)	GLO	×
Passenger train - Electricity and diesel	transport, passenger train | transport, passenger train | cut-off, U - NC - NF	1 pkm	Ecoinvent v3.3 (Wernet et al., 2016)	DE			×		×				with diesel but without electricity
	transport, passenger train | transport, passenger train | cut-off, U - NC - NF - NF	1 pkm	Ecoinvent v3.3 (Wernet et al., 2016)	DE			×	×	×				without diesel and electricity, used for admixture of synthetic fuels and biofuels
	transport, passenger train | transport, passenger train | cut-off, U - NC - NF - DEF	1 pkm	Ecoinvent v3.3 (Wernet et al., 2016)	DE			×	×	×			×	no input of diesel and electricity, used for admixture of H2
	transport, passenger train | transport, passenger train | cut-off, U - NCP	1 qty	Ecoinvent v3.3 (Wernet et al., 2016)	GLO		×
Passenger Train High Speed - Electricity	transport, passenger train, high-speed | transport, passenger train | cut-off, U - NC - NF	1 pkm	Ecoinvent v3.3 (Wernet et al., 2016)	DE			×		×				no electricity input as electricity production is accounted for in the power sector
	transport, passenger train, high-speed | transport, passenger train | cut-off, U - NCP	1 qty	Ecoinvent v3.3 (Wernet et al., 2016)	GLO		×
Passenger Train Regional - Electricity	transport, passenger train, regional | transport, passenger train | cut-off, U - NC - NF	1 pkm	Ecoinvent v3.3 (Wernet et al., 2016)	CH			×		×				no electricity input as electricity production is accounted for in the power sector
	transport, passenger train, regional | transport, passenger train | cut-off, U - NCP	1 qty	Ecoinvent v3.3 (Wernet et al., 2016)	GLO		×
Passenger Train Urban - Electricity	transport, passenger train, urban | transport, passenger train | cut-off, U - NC - NF	1 pkm	Ecoinvent v3.3 (Wernet et al., 2016)	CH			×		×				no electricity input as electricity production is accounted for in the power sector
	transport, passenger train, urban | transport, passenger train | cut-off, U - NCP	1 qty	Ecoinvent v3.3 (Wernet et al., 2016)	GLO		×
Regular Bus	transport, regular bus | transport, regular bus | cut-off, U - NC	1 pkm	Ecoinvent v3.3 (Wernet et al., 2016)	CH			×						for fossil diesel only
	transport, regular bus | transport, regular bus | cut-off, U - NC - NF - DEF	1 pkm	Ecoinvent v3.3 (Wernet et al., 2016)	CH			×	×				×	no fossol diesel input, used for admixture of H2
	transport, regular bus | transport, regular bus | cut-off, U - NC - NF	1 pkm	Ecoinvent v3.3 (Wernet et al., 2016)	CH			×	×					no fossil diesel input
	transport, regular bus | transport, regular bus | cut-off, U - NCP	1 qty	Ecoinvent v3.3 (Wernet et al., 2016)	GLO		×
Tram	transport, tram | transport, tram | cut-off, U - NC - NF	1 pkm	Ecoinvent v3.3 (Wernet et al., 2016)	CH			×		×				no electricity input as electricity production is accounted for in the power sector
	transport, tram | transport, tram | cut-off, U - NCP	1 qty	Ecoinvent v3.3 (Wernet et al., 2016)	GLO		×
Trolleybus (Overhead line)	transport, trolleybus | transport, trolleybus | cut-off, U - NC - NF	1 pkm	Ecoinvent v3.3 (Wernet et al., 2016)	CH			×		×				no electricity input as electricity production is accounted for in the power sector
	transport, trolleybus | transport, trolleybus | cut-off, U - NCP	1 qty	Ecoinvent v3.3 (Wernet et al., 2016)	GLO		×
Air traffic (Passenger) - Intercontinental	transport, passenger, aircraft, intercontinental | transport, passenger, aircraft | cut-off, U - NC	1 pkm	Ecoinvent v3.3 (Wernet et al., 2016)	RER			×						for fossil kerosene only
	transport, passenger, aircraft, intercontinental | transport, passenger, aircraft | cut-off, U - NC - NF	1 pkm	Ecoinvent v3.3 (Wernet et al., 2016)	RER			×	×					no fossil kerosene input, used for admixture of synthetic fuels and biofuels
	transport, passenger, aircraft, intercontinental | transport, passenger, aircraft | cut-off, U - NCP	1 qty	Ecoinvent v3.3 (Wernet et al., 2016)	GLO		×
Air traffic (Passenger) - Intracontinental	transport, passenger, aircraft, intracontinental | transport, passenger, aircraft | cut-off, U - NC	1 pkm	Ecoinvent v3.3 (Wernet et al., 2016)	RER			×						for fossil kerosene only
	transport, passenger, aircraft, intracontinental | transport, passenger, aircraft | cut-off, U - NC - NF	1 pkm	Ecoinvent v3.3 (Wernet et al., 2016)	RER			×	×					no fossil kerosene input, used for admixture of synthetic fuels and biofuels
	transport, passenger, aircraft, intracontinental | transport, passenger, aircraft | cut-off, U - NCP	1 qty	Ecoinvent v3.3 (Wernet et al., 2016)	GLO		×
Freight transport
Lorry 3.5-7.5 metric ton	transport, freight, lorry 3.5-7.5 metric ton, EURO6 | transport, freight, lorry 3.5-7.5 metric ton, EURO6 | cut-off, U - NC	1 tkm	Ecoinvent v3.3 (Wernet et al., 2016)	RER			×						for fossil diesel only
	transport, freight, lorry 3.5-7.5 metric ton, EURO6 | transport, freight, lorry 3.5-7.5 metric ton, EURO6 | cut-off, U - NC - NF	1 tkm	Ecoinvent v3.3 (Wernet et al., 2016)	RER			×	×					no fossil diesel input, used for admixture of synthetic fuels and biofuels
	transport, freight, lorry 3.5-7.5 metric ton, EURO6 | transport, freight, lorry 3.5-7.5 metric ton, EURO6 | cut-off, U - NC - NF - DEF	1 tkm	Ecoinvent v3.3 (Wernet et al., 2016)	RER			×	×				×	no fuel input and only Nox emissions
	transport, freight, lorry 16-32 metric ton, EURO6 | transport, freight, lorry 16-32 metric ton, EURO6 | cut-off, U - NCP	1 qty	Ecoinvent v3.3 (Wernet et al., 2016)	GLO		×
Lorry 7.5-16 metric ton	transport, freight, lorry 7.5-16 metric ton, EURO6 | transport, freight, lorry 7.5-16 metric ton, EURO6 | cut-off, U - NC	1 tkm	Ecoinvent v3.3 (Wernet et al., 2016)	RER			×						for fossil diesel only
	transport, freight, lorry 7.5-16 metric ton, EURO6 | transport, freight, lorry 7.5-16 metric ton, EURO6 | cut-off, U - NC - NF	1 tkm	Ecoinvent v3.3 (Wernet et al., 2016)	RER			×	×					no fossil diesel input, used for admixture of synthetic fuels and biofuels
	transport, freight, lorry 7.5-16 metric ton, EURO6 | transport, freight, lorry 7.5-16 metric ton, EURO6 | cut-off, U - NC - NF - DEF	1 tkm	Ecoinvent v3.3 (Wernet et al., 2016)	RER			×	×				×	no fossil diesel input, used for admixture of H2
	transport, freight, lorry 16-32 metric ton, EURO6 | transport, freight, lorry 16-32 metric ton, EURO6 | cut-off, U - NCP	1 qty	Ecoinvent v3.3 (Wernet et al., 2016)	GLO		×
Lorry 16-32 metric ton	transport, freight, lorry 16-32 metric ton, EURO6 | transport, freight, lorry 16-32 metric ton, EURO6 | cut-off, U - NC	1 tkm	Ecoinvent v3.3 (Wernet et al., 2016)	RER			×						for fossil diesel only
	transport, freight, lorry 16-32 metric ton, EURO6 | transport, freight, lorry 16-32 metric ton, EURO6 | cut-off, U - NC - NF	1 tkm	Ecoinvent v3.3 (Wernet et al., 2016)	RER			×	×					no fossil diesel input, used for admixture of synthetic fuels and biofuels
	transport, freight, lorry 16-32 metric ton, EURO6 | transport, freight, lorry 16-32 metric ton, EURO6 | cut-off, U - NC - NF - DEF	1 tkm	Ecoinvent v3.3 (Wernet et al., 2016)	RER			×	×				×	no fossil diesel input, used for admixture of H2
	transport, freight, lorry 16-32 metric ton, EURO6 | transport, freight, lorry 16-32 metric ton, EURO6 | cut-off, U - NCP	1 qty	Ecoinvent v3.3 (Wernet et al., 2016)	GLO		×
Lorry >32 metric ton	transport, freight, lorry >32 metric ton, EURO6 | transport, freight, lorry >32 metric ton, EURO6 | cut-off, U - NC	1 tkm	Ecoinvent v3.3 (Wernet et al., 2016)	RER			×						for fossil diesel only
	transport, freight, lorry >32 metric ton, EURO6 | transport, freight, lorry >32 metric ton, EURO6 | cut-off, U - NC - NF	1 tkm	Ecoinvent v3.3 (Wernet et al., 2016)	RER			×	×					no fossil diesel input, used for admixture of synthetic fuels and biofuels
	transport, freight, lorry >32 metric ton, EURO6 | transport, freight, lorry >32 metric ton, EURO6 | cut-off, U - NC - NF - DEF	1 tkm	Ecoinvent v3.3 (Wernet et al., 2016)	RER			×	×				×	no fossil diesel input, used for admixture of H2
	transport, freight, lorry 16-32 metric ton, EURO6 | transport, freight, lorry 16-32 metric ton, EURO6 | cut-off, U - NCP	1 qty	Ecoinvent v3.3 (Wernet et al., 2016)	GLO		×
Freight Train - Diesel and electricity	transport, freight train | transport, freight train | cut-off, U - NC - NF	1 tkm	Ecoinvent v3.3 (Wernet et al., 2016)	Europe without Switzerland			×		×				for fossil diesel only, no electricity input as electricity production is accounted for in the power sector
	transport, freight train | transport, freight train | cut-off, U - NC - NF - NF	1 tkm	Ecoinvent v3.3 (Wernet et al., 2016)	Europe without Switzerland			×	×	×			×	no fossil diesel input, no electricity input as electricity production is accounted for in the power sector, used for admixture of synthetic fuels and biofuels
	transport, freight train | transport, freight train | cut-off, U - NC - NF - NF - DEF	1 tkm	Ecoinvent v3.3 (Wernet et al., 2016)	Europe without Switzerland		×		×	×				no fossil diesel input, no electricity input as electricity production is accounted for in the power sector, used for admixture of H2
	transport, freight train | transport, freight train | cut-off, U - NCP	1 qty	Ecoinvent v3.3 (Wernet et al., 2016)	GLO
Freight Train - Diesel	transport, freight train, diesel | transport, freight train | cut-off, U - NC	1 tkm	Ecoinvent v3.3 (Wernet et al., 2016)	Europe without Switzerland			×						for fossil diesel only
	transport, freight train, diesel | transport, freight train | cut-off, U - NC - NF	1 tkm	Ecoinvent v3.3 (Wernet et al., 2016)	Europe without Switzerland			×	×					no fossil diesel input, used for admixture of synthetic fuels and biofuels
	transport, freight train, diesel | transport, freight train | cut-off, U - NC - NF - DEF	1 tkm	Ecoinvent v3.3 (Wernet et al., 2016)	Europe without Switzerland			×	×				×	no fossil diesel input, used for admixture of H2
	transport, freight train, diesel | transport, freight train | cut-off, U - NCP	1 qty	Ecoinvent v3.3 (Wernet et al., 2016)	GLO		×
Freight Train - Diesel and electricity	transport, freight train, electricity | transport, freight train | cut-off, U - NC - NF	1 tkm	Ecoinvent v3.3 (Wernet et al., 2016)	Europe without Switzerland			×		×				for fossil diesel only, no electricity input as electricity production is accounted for in the power sector
	transport, freight train, electricity | transport, freight train | cut-off, U - NC - NF - NF	1 tkm	Ecoinvent v3.3 (Wernet et al., 2016)	Europe without Switzerland			×	×	×				no fossil diesel input, no electricity input as electricity production is accounted for in the power sector, used for admixture of synthetic fuels and biofuels
	transport, freight train, electricity | transport, freight train | cut-off, U - NC - NF - DEF	1 tkm	Ecoinvent v3.3 (Wernet et al., 2016)	Europe without Switzerland			×	×	×			×	no fossil diesel input, no electricity input as electricity production is accounted for in the power sector, used for admixture of H2
	transport, freight train, electricity | transport, freight train | cut-off, U - NCP	1 qty	Ecoinvent v3.3 (Wernet et al., 2016)	GLO		×
Air traffic (Freight) - Intercontinental	transport, freight, aircraft, intercontinental | transport, freight, aircraft | cut-off, U - NC	1 tkm	Ecoinvent v3.3 (Wernet et al., 2016)	RER			×						for fossil kerosene only
	transport, freight, aircraft, intercontinental | transport, freight, aircraft | cut-off, U - NC - NF	1 tkm	Ecoinvent v3.3 (Wernet et al., 2016)	RER			×	×					no fossil kerosene input, used for admixture of synthetic fuels and biofuels
	transport, freight, aircraft, intercontinental | transport, freight, aircraft | cut-off, U - NCP	1 qty	Ecoinvent v3.3 (Wernet et al., 2016)	GLO		×
Air traffic (Freight) - Intracontinental	transport, freight, aircraft, intracontinental | transport, freight, aircraft | cut-off, U - NC	1 tkm	Ecoinvent v3.3 (Wernet et al., 2016)	RER			×						for fossil kerosene only
	transport, freight, aircraft, intracontinental | transport, freight, aircraft | cut-off, U - NC - NF	1 tkm	Ecoinvent v3.3 (Wernet et al., 2016)	RER			×	×					no fossil kerosene input, used for admixture of synthetic fuels and biofuels
	transport, freight, aircraft, intracontinental | transport, freight, aircraft | cut-off, U - NCP	1 qty	Ecoinvent v3.3 (Wernet et al., 2016)	GLO		×
Navigation (Freight) - Intercontinental	transport, freight, inland waterways, barge | transport, freight, inland waterways, barge | cut-off, U - NC	1 tkm	Ecoinvent v3.3 (Wernet et al., 2016)	RER			×						for fossil diesel only
	transport, freight, inland waterways, barge | transport, freight, inland waterways, barge | cut-off, U - NC - NF	1 tkm	Ecoinvent v3.3 (Wernet et al., 2016)	RER			×	×					no fossil diesel input, used for admixture of synthetic fuels and biofuels
	market for barge | barge | cut-off, U - ORG	1 qty	Ecoinvent v3.3 (Wernet et al., 2016)	GLO		×
Navigation (Freight) - Intracontinental	transport, freight, sea, liquefied natural gas | transport, freight, sea, liquefied natural gas | cut-off, U - NC	1 tkm	Ecoinvent v3.3 (Wernet et al., 2016)	GLO			×						for LNG only
	transport, freight, sea, liquefied natural gas | transport, freight, sea, liquefied natural gas | cut-off, U - NC - NF	1 tkm	Ecoinvent v3.3 (Wernet et al., 2016)	GLO			×	×					no fossil LNG input, used for admixture of synthetic gas and biogas
	transport, freight, sea, liquefied natural gas | transport, freight, sea, liquefied natural gas | cut-off, U - NC - NF - DEF	1 tkm	Ecoinvent v3.3 (Wernet et al., 2016)	GLO			×	×				×	no fossil LNG input, used for admixture of H2
	market for freight ship, transoceanic | freight ship, transoceanic | cut-off, U - ORG	1 qty	Ecoinvent v3.3 (Wernet et al., 2016)	GLO		×
Background database	electricity production, hydrogen, combined cycle power plant | electricity, high voltage | cut-off, U		Ecoinvent v3.3 (Wernet et al., 2016); own assumptions	GLO								×	no fossil gas input, hydrogen input, data on the electrolysis from (Koj et al., 2017) with average electricity mix from global background scenario (region RoW); Hydrogen supply 50% by pipeline, 50% by truck, modelled with generic dataset from (Wulf and Zapp, 2020)
	heat and power co-generation, hydrogen, combined cycle power plant, 400MW electrical | electricity, high voltage | cut-off, U		Ecoinvent v3.3 (Wernet et al., 2016); own assumptions	GLO								×	no fossil gas input, hydrogen input, data on the electrolysis from (Koj et al., 2017) with average electricity mix from global background scenario (region RoW); Hydrogen supply 50% by pipeline, 50% by truck, modelled with generic dataset from (Wulf and Zapp, 2020)
Sources
Arden, F., 2017. Ökobilanzieller Vergleich zweier unterschiedlicher solarthermischer Kollektoren mit Behälterspeicher innerhalb eines Nahwärmeversorgungssystems. Bachelor thesis at Applied University of Pforzheim (supervised by Jens Buchgeister)
Benitez, A., Wulf, C., Palmenaer, A.d., Lengersdorf, M., Röding, T., Grube, T., Robinius, M., Stolten, D., Kuckshinrichs, W., 2020. Ecological assessment of hydrogen tanks for fuel cell electric vehicles. Submitted to the Journal of Cleaner Production
Bouman, E.A., Øberg, M.M., Hertwich, E.G., 2016. Environmental impacts of balancing offshore wind power with compressed air energy storage (CAES). Energy 95, 91-98.
Haase, M., Rösch, C., 2019. Sustainability Assessment of Innovative Energy Technologies - Integrated Biomass-based Production of Fuel, Electricity and Heat, 27th European Biomass Conference and Exhibition. Lisbon, Portugal.
Koj, J.C., Wulf, C., Schreiber, A., Zapp, P., 2017. Site-Dependent Environmental Impacts of Industrial Hydrogen Production by Alkaline Water Electrolysis. 10(7), 860.
Peters, J.F., Weil, M., 2017. Aqueous hybrid ion batteries – An environmentally friendly alternative for stationary energy storage? Journal of Power Sources 364, 258-265.
Peters, J.F., Weil, M., 2018. Providing a common base for life cycle assessments of Li-Ion batteries. Journal of Cleaner Production 171, 704-713.
Schebek, L., Biemann, K., Ciroth, A., Düpmeier, C., Eltrop, L., Sonja Simon, Viebahn, P., Zschunke, T., Wagner, H.-J., 2013. BioEnergieDat - Die OpenSource Datenplatform für BioEnergie in Deutschland.
Spanos, C., Turney, D.E., Fthenakis, V., 2015. Life-cycle analysis of flow-assisted nickel zinc-, manganese dioxide-, and valve-regulated lead-acid batteries designed for demand-charge reduction. Renewable and Sustainable Energy Reviews 43, 478-494.
UBA, 2020. Systemvergleich speicherbarer Energieträger aus erneuerbaren Energien. In Print.
UVEK, 2018. UVEK LCI Data 2018. Bundesamt für Umwelt BAFU, Switzerland, https://nexus.openlca.org/database/UVEK%20LCI%20Data.
Weber, S., Peters, J.F., Baumann, M., Weil, M., 2018. Life Cycle Assessment of a Vanadium Redox Flow Battery. Environmental Science & Technology 52(18), 10864-10873.
Wernet, G., Bauer, C., Steubing, B., Reinhard, J., Moreno-Ruiz, E., Weidema, B., 2016. The ecoinvent database version 3 (part I): overview and methodology. The International Journal of Life Cycle Assessment 21(9), 1218-1230.
Wulf, C., Zapp, P., 2020. Sustainability assessment of innovative energy technologies – Hydrogen from wind power as a fuel for mobility applications. Submitted to the International Journal of Hydrogen Energy.
Geographies
CH - Switzerland
DE - Germany
GLO - Global
RER - Europe
RoW - Rest-of-World

## Sheet: unit conversion - old
unit1	unit2	unit_new
MJ/MW	MW	MJ
kg CO2-Eq/MW	MW	kg CO2-Eq
kg CO2 eq/MW	MW	kg CO2-Eq
mol H+-Eq/MW	MW	mol H+-Eq
molc H+ eq/MW	MW	molc H+-Eq
CTUh.m3.yr/MW	MW	CTUh.m3.yr
kg P-Eq/MW	MW	kg P-Eq
kg P eq/MW	MW	kg P eq
kg N-Eq/MW	MW	kg N-Eq
kg N eq/MW	MW	kg N eq
kg C deficit/MW	MW	kg C deficit
mol N-Eq/MW	MW	mol N-Eq
molc N eq/MW	MW	molc N eq
CTUh/MW	MW	CTUh
CTUe/MW	MW	CTUe
CTU/MW	MW	CTU
kg U235-Eq/MW	MW	kg U235-Eq
kBq U235 eq/MW	MW	kBq U235 eq
kg CFC-11-Eq/MW	MW	kg CFC-11-Eq
kg CFC-11 eq/MW	MW	kg CFC-11 eq
kg ethylene-Eq/MW	MW	kg ethylene-Eq
kg NMVOC eq/MW	MW	kg NMVOC eq
kg PM2.5-Eq/MW	MW	kg PM2.5-Eq
kg PM2.5 eq/MW	MW	kg PM2.5 eq
kg Soil Organic Carbon/MW	MW	kg Soil Organic Carbon
kg Sb-Eq/MW	MW	kg Sb-Eq
kg Sb eq/MW	MW	kg Sb eq
kg/MW	MW	kg
disease incidence/MW	MW	disease incidence
points/MW	MW	points
m3 water-Eq/MW	MW	m3 water eq
m3 water eq/MW	MW	m3 water eq
m2/MW	MW	m2
kg CO2-Eq/a	a	kg CO2-Eq
kg CO2 eq/a	a	kg CO2-Eq
mol H+-Eq/a	a	mol H+-Eq
molc H+ eq/a	a	molc H+-Eq
CTUh.m3.yr/a	a	CTUh.m3.yr
kg P-Eq/a	a	kg P-Eq
kg P eq/a	a	kg P eq
kg N-Eq/a	a	kg N-Eq
kg N eq/a	a	kg N eq
kg C deficit/a	a	kg C deficit
mol N-Eq/a	a	mol N-Eq
molc N eq/a	a	molc N eq
CTUh/a	a	CTUh
CTUe/a	a	CTUe
kg U235-Eq/a	a	kg U235-Eq
kBq U235 eq/a	a	kBq U235 eq
kg CFC-11-Eq/a	a	kg CFC-11-Eq
kg CFC-11 eq/a	a	kg CFC-11 eq
kg ethylene-Eq/a	a	kg ethylene-Eq
kg NMVOC eq/a	a	kg NMVOC eq
kg PM2.5-Eq/a	a	kg PM2.5-Eq
kg PM2.5 eq/a	a	kg PM2.5 eq
kg Soil Organic Carbon/a	a	kg Soil Organic Carbon
kg Sb-Eq/a	a	kg Sb-Eq
kg Sb eq/a	a	kg Sb eq
kg/a	a	kg
m3 water eq/a	a	m3 water eq
m2/a	a	m2
kg CO2-Eq/MW	MW/a	kg CO2-Eq/a
kg CO2 eq/MW	MW/a	kg CO2-Eq/a
mol H+-Eq/MW	MW/a	mol H+-Eq/a
molc H+ eq/MW	MW/a	molc H+-Eq/a
CTUh.m3.yr/MW	MW/a	CTUh.m3.yr/a
kg P-Eq/MW	MW/a	kg P-Eq/a
kg P eq/MW	MW/a	kg P eq/a
kg N-Eq/MW	MW/a	kg N-Eq/a
kg N eq/MW	MW/a	kg N eq/a
kg C deficit/MW	MW/a	kg C deficit/a
mol N-Eq/MW	MW/a	mol N-Eq/a
molc N eq/MW	MW/a	molc N eq/a
CTUh/MW	MW/a	CTUh/a
CTUe/MW	MW/a	CTUe/a
kg U235-Eq/MW	MW/a	kg U235-Eq/a
kBq U235 eq/MW	MW/a	kBq U235 eq/a
kg CFC-11-Eq/MW	MW/a	kg CFC-11-Eq/a
kg CFC-11 eq/MW	MW/a	kg CFC-11 eq/a
kg ethylene-Eq/MW	MW/a	kg ethylene-Eq/a
kg NMVOC eq/MW	MW/a	kg NMVOC eq/a
kg PM2.5-Eq/MW	MW/a	kg PM2.5-Eq/a
kg PM2.5 eq/MW	MW/a	kg PM2.5 eq/a
kg Soil Organic Carbon/MW	MW/a	kg Soil Organic Carbon/a
kg Sb-Eq/MW	MW/a	kg Sb-Eq/a
kg Sb eq/MW	MW/a	kg Sb eq/a
kg/MW	MW/a	kg/a
m3 water eq/MW	MW/a	m3 water eq/a
m2/MW	MW/a	m2/a
kg CO2-Eq/kWh	kWh/a	kg CO2-Eq/a
kg CO2 eq/kWh	kWh/a	kg CO2-Eq/a
mol H+-Eq/kWh	kWh/a	mol H+-Eq/a
molc H+ eq/kWh	kWh/a	molc H+-Eq/a
CTUh.m3.yr/kWh	kWh/a	CTUh.m3.yr/a
kg P-Eq/kWh	kWh/a	kg P-Eq/a
kg P eq/kWh	kWh/a	kg P eq/a
kg N-Eq/kWh	kWh/a	kg N-Eq/a
kg N eq/kWh	kWh/a	kg N eq/a
kg C deficit/kWh	kWh/a	kg C deficit/a
mol N-Eq/kWh	kWh/a	mol N-Eq/a
molc N eq/kWh	kWh/a	molc N eq/a
kg U235-Eq/kWh	kWh/a	kg U235-Eq/a
kBq U235 eq/kWh	kWh/a	kBq U235 eq/a
CTUh/kWh	kWh/a	CTUh/a
CTUe/kWh	kWh/a	CTUe/a
kg CFC-11-Eq/kWh	kWh/a	kg CFC-11-Eq/a
kg CFC-11 eq/kWh	kWh/a	kg CFC-11 eq/a
kg ethylene-Eq/kWh	kWh/a	kg ethylene-Eq/a
kg NMVOC eq/kWh	kWh/a	kg NMVOC eq/a
kg PM2.5-Eq/kWh	kWh/a	kg PM2.5-Eq/a
kg PM2.5 eq/kWh	kWh/a	kg PM2.5 eq/a
kg Soil Organic Carbon/kWh	kWh/a	kg Soil Organic Carbon/a
kg Sb-Eq/kWh	kWh/a	kg Sb-Eq/a
kg Sb eq/kWh	kWh/a	kg Sb eq/a
kg/kWh	kWh/a	kg/a
m3 water eq/kWh	kWh/a	m3 water eq/a
m2/kWh	kWh/a	m2/a
kg CO2-Eq/kWh	kWh	kg CO2-Eq
kg CO2 eq/kWh	kWh	kg CO2-Eq
mol H+-Eq/kWh	kWh	mol H+-Eq
molc H+ eq/kWh	kWh	molc H+-Eq
CTUh.m3.yr/kWh	kWh	CTUh.m3.yr
kg P-Eq/kWh	kWh	kg P-Eq
kg P eq/kWh	kWh	kg P eq
kg N-Eq/kWh	kWh	kg N-Eq
kg N eq/kWh	kWh	kg N eq
kg C deficit/kWh	kWh	kg C deficit
mol N-Eq/kWh	kWh	mol N-Eq
molc N eq/kWh	kWh	molc N eq
kg U235-Eq/kWh	kWh	kg U235-Eq
kBq U235 eq/kWh	kWh	kBq U235 eq
CTUh/kWh	kWh	CTUh
CTUe/kWh	kWh	CTUe
kg CFC-11-Eq/kWh	kWh	kg CFC-11-Eq
kg CFC-11 eq/kWh	kWh	kg CFC-11 eq
kg ethylene-Eq/kWh	kWh	kg ethylene-Eq
kg NMVOC eq/kWh	kWh	kg NMVOC eq
kg PM2.5-Eq/kWh	kWh	kg PM2.5-Eq
kg PM2.5 eq/kWh	kWh	kg PM2.5 eq
kg Soil Organic Carbon/kWh	kWh	kg Soil Organic Carbon
kg Sb-Eq/kWh	kWh	kg Sb-Eq
kg Sb eq/kWh	kWh	kg Sb eq
kg/kWh	kWh	kg
m3 water eq/kWh	kWh	m3 water eq
m2/kWh	kWh	m2
kg CO2-Eq/qty	qty	kg CO2-Eq
kg CO2 eq/qty	qty	kg CO2-Eq
mol H+-Eq/qty	qty	mol H+-Eq
molc H+ eq/qty	qty	molc H+-Eq
CTUh.m3.yr/qty	qty	CTUh.m3.yr
kg P-Eq/qty	qty	kg P-Eq
kg P eq/qty	qty	kg P eq
kg N-Eq/qty	qty	kg N-Eq
kg N eq/qty	qty	kg N eq
kg C deficit/qty	qty	kg C deficit
mol N-Eq/qty	qty	mol N-Eq
molc N eq/qty	qty	molc N eq
kg U235-Eq/qty	qty	kg U235-Eq
kBq U235 eq/qty	qty	kBq U235 eq
CTUh/qty	qty	CTUh
CTUe/qty	qty	CTUe
kg CFC-11-Eq/qty	qty	kg CFC-11-Eq
kg CFC-11 eq/qty	qty	kg CFC-11 eq
kg ethylene-Eq/qty	qty	kg ethylene-Eq
kg NMVOC eq/qty	qty	kg NMVOC eq
kg PM2.5-Eq/qty	qty	kg PM2.5-Eq
kg PM2.5 eq/qty	qty	kg PM2.5 eq
kg Soil Organic Carbon/qty	qty	kg Soil Organic Carbon
kg Sb-Eq/qty	qty	kg Sb-Eq
kg Sb eq/qty	qty	kg Sb eq
kg/qty	qty	kg
m3 water eq/qty	qty	m3 water eq
m2/qty	qty	m2
kg CO2-Eq/qty	qty/a	kg CO2-Eq/a
kg CO2 eq/qty	qty/a	kg CO2-Eq/a
mol H+-Eq/qty	qty/a	mol H+-Eq/a
molc H+ eq/qty	qty/a	molc H+-Eq/a
CTUh.m3.yr/qty	qty/a	CTUh.m3.yr/a
kg P-Eq/qty	qty/a	kg P-Eq/a
kg P eq/qty	qty/a	kg P eq/a
kg N-Eq/qty	qty/a	kg N-Eq/a
kg N eq/qty	qty/a	kg N eq/a
kg C deficit/qty	qty/a	kg C deficit/a
mol N-Eq/qty	qty/a	mol N-Eq/a
molc N eq/qty	qty/a	molc N eq/a
kg U235-Eq/qty	qty/a	kg U235-Eq/a
kBq U235 eq/qty	qty/a	kBq U235 eq/a
CTUh/qty	qty/a	CTUh/a
CTUe/qty	qty/a	CTUe/a
kg CFC-11-Eq/qty	qty/a	kg CFC-11-Eq/a
kg CFC-11 eq/qty	qty/a	kg CFC-11 eq/a
kg ethylene-Eq/qty	qty/a	kg ethylene-Eq/a
kg NMVOC eq/qty	qty/a	kg NMVOC eq/a
kg PM2.5-Eq/qty	qty/a	kg PM2.5-Eq/a
kg PM2.5 eq/qty	qty/a	kg PM2.5 eq/a
kg Soil Organic Carbon/qty	qty/a	kg Soil Organic Carbon/a
kg Sb-Eq/qty	qty/a	kg Sb-Eq/a
kg Sb eq/qty	qty/a	kg Sb eq/a
kg/qty	qty/a	kg/a
m3 water eq/qty	qty/a	m3 water eq/a
m2/qty	qty/a	m2/a
kg CO2-Eq/pkm	pkm/a	kg CO2-Eq/a
kg CO2 eq/pkm	pkm/a	kg CO2-Eq/a
mol H+-Eq/pkm	pkm/a	mol H+-Eq/a
molc H+ eq/pkm	pkm/a	molc H+-Eq/a
CTUh.m3.yr/pkm	pkm/a	CTUh.m3.yr/a
kg P-Eq/pkm	pkm/a	kg P-Eq/a
kg P eq/pkm	pkm/a	kg P eq/a
kg N-Eq/pkm	pkm/a	kg N-Eq/a
kg N eq/pkm	pkm/a	kg N eq/a
kg C deficit/pkm	pkm/a	kg C deficit
mol N-Eq/pkm	pkm/a	mol N-Eq/a
molc N eq/pkm	pkm/a	molc N eq/a
kg U235-Eq/pkm	pkm/a	kg U235-Eq/a
kBq U235 eq/pkm	pkm/a	kBq U235 eq/a
CTUh/pkm	pkm/a	CTUh/a
CTUe/pkm	pkm/a	CTUe/a
kg CFC-11-Eq/pkm	pkm/a	kg CFC-11-Eq/a
kg CFC-11 eq/pkm	pkm/a	kg CFC-11 eq/a
kg ethylene-Eq/pkm	pkm/a	kg ethylene-Eq/a
kg NMVOC eq/pkm	pkm/a	kg NMVOC eq/a
kg PM2.5-Eq/pkm	pkm/a	kg PM2.5-Eq/a
kg PM2.5 eq/pkm	pkm/a	kg PM2.5 eq/a
kg Soil Organic Carbon/pkm	pkm/a	kg Soil Organic Carbon/a
kg Sb-Eq/pkm	pkm/a	kg Sb-Eq/a
kg Sb eq/pkm	pkm/a	kg Sb eq/a
kg/pkm	pkm/a	kg/a
m3 water eq/pkm	pkm/a	m3 water eq/a
m2/pkm	pkm/a	m2/a
kg CO2-Eq/tkm	tkm/a	kg CO2-Eq/a
kg CO2 eq/tkm	tkm/a	kg CO2-Eq/a
mol H+-Eq/tkm	tkm/a	mol H+-Eq/a
molc H+ eq/tkm	tkm/a	molc H+-Eq/a
CTUh.m3.yr/tkm	tkm/a	CTUh.m3.yr/a
kg P-Eq/tkm	tkm/a	kg P-Eq/a
kg P eq/tkm	tkm/a	kg P eq/a
kg N-Eq/tkm	tkm/a	kg N-Eq/a
kg N eq/tkm	tkm/a	kg N eq/a
kg C deficit/tkm	tkm/a	kg C deficit
mol N-Eq/tkm	tkm/a	mol N-Eq/a
molc N eq/tkm	tkm/a	molc N eq/a
kg U235-Eq/tkm	tkm/a	kg U235-Eq/a
kBq U235 eq/tkm	tkm/a	kBq U235 eq/a
CTUh/tkm	tkm/a	CTUh/a
CTUe/tkm	tkm/a	CTUe/a
kg CFC-11-Eq/tkm	tkm/a	kg CFC-11-Eq/a
kg CFC-11 eq/tkm	tkm/a	kg CFC-11 eq/a
kg ethylene-Eq/tkm	tkm/a	kg ethylene-Eq/a
kg NMVOC eq/tkm	tkm/a	kg NMVOC eq/a
kg PM2.5-Eq/tkm	tkm/a	kg PM2.5-Eq/a
kg PM2.5 eq/tkm	tkm/a	kg PM2.5 eq/a
kg Soil Organic Carbon/tkm	tkm/a	kg Soil Organic Carbon/a
kg Sb-Eq/tkm	tkm/a	kg Sb-Eq/a
kg Sb eq/tkm	tkm/a	kg Sb eq/a
kg/tkm	tkm/a	kg/a
m3 water eq/tkm	tkm/a	m3 water eq/a
m2/tkm	tkm/a	m2/a
kg/car	qty	kg
kg/car	qty/a	kg/a
kg/km	tkm/a	kg/a
kg/km	pkm/a	kg/a
MJ-Eq/kWh	kWh/a	MJ-Eq/a
MJ-Eq/MW	MW	MJ-Eq
fatalities/GWe/yr	MW	1/1000 fatalities/yr
1/1000 fatalities/yr	a	1/1000 fatalities
fatalities	MW	dummy
m2/kWh/a	kWh	m2/a

## Sheet: S2_Fuel shares
	ID	unit	2000	2001	2002	2003	2004	2005	2006	2007	2008	2009	2010	2011	2012	2013	2014	2015	2016	2017	2018	2019	2020	2021	2022	2023	2024	2025	2026	2027	2028	2029	2030	2031	2032	2033	2034	2035	2036	2037	2038	2039	2040	2041	2042	2043	2044	2045	2046
Assumption from ESM
	Share_FOS_in_GasNet	-	1	1	1	1	1	1	1	1	1	1	1	1	1	1	1	1	1	1	1	1	1	1	1	1	1	1	1	1	1	1	1	1	1	1	1	1	1	1	1	1	1	1	1	1	1	1	1
	Share_BIO+EE-CH4_in_GasNet	-	0	0	0	0	0	0	0	0	0	0	0	0	0	0	0	0	0	0	0	0	0	0	0	0	0	0	0	0	0	0	0	0	0	0	0	0	0	0	0	0	0	0	0	0	0	0	0
	Share_H2_in_GasNet	-	0	0	0	0	0	0	0	0	0	0	0	0	0	0	0	0	0	0	0	0	0	0	0	0	0	0	0	0	0	0	0	0	0	0	0	0	0	0	0	0	0	0	0	0	0	0	0
	Share_FOS_in_PP_GasCC_noCCS	-	1	1	1	1	1	1	1	1	1	1	1	1	1	1	1	1	1	1	1	1	1	1	1	1	1	1	1	1	1	1	1	1	1	1	1	1	1	1	1	1	1	0.993771	0.98555	0.976665	0.968444	0.962215	0.958944
	Share_BIO+EE-CH4_in_PP_GasCC_noCCS	-	0	0	0	0	0	0	0	0	0	0	0	0	0	0	0	0	0	0	0	0	0	0	0	0	0	0	0	0	0	0	0	0	0	0	0	0	0	0	0	0	0	0	0	0	0	0	0
	Share_H2_in_PP_GasCC_noCCS	-	0	1.58307e-16	0	0	0	0	0	0	0	1.53393e-16	0	0	0	0	0	0	0	0	-1.26372e-16	0	0	0	0	0	0	0	0	0	0	1.42087e-16	0	-1.21317e-16	0	0	0	0	0	0	0	0	-1.52183e-16	0.0062292	0.01445	0.0233347	0.0315555	0.0377848	0.0410564
	Share_FOS_in_PP_GasCC_CCS	-	1	1	1	1	1	1	1	1	1	1	1	1	1	1	1	1	1	1	1	1	1	1	1	1	1	1	1	1	1	1	1	1	1	1	1	1	1	1	1	1	1	0.993771	0.98555	0.976665	0.968444	0.962215	0.958944
	Share_BIO+EE-CH4_in_PP_GasCC_CCS	-	0	0	0	0	0	0	0	0	0	0	0	0	0	0	0	0	0	0	0	0	0	0	0	0	0	0	0	0	0	0	0	0	0	0	0	0	0	0	0	0	0	0	0	0	0	0	0
	Share_H2_in_PP_GasCC_CCS	-	0	-1.51368e-16	-1.51368e-16	-1.51368e-16	-1.51368e-16	-1.51368e-16	-1.51368e-16	-1.51368e-16	-1.51368e-16	-1.51368e-16	-1.51368e-16	-1.51368e-16	-1.51368e-16	-1.51368e-16	-1.51368e-16	-1.51368e-16	-1.51368e-16	-1.51368e-16	-1.51368e-16	-1.51368e-16	-1.51368e-16	0	0	-1.53149e-16	0	0	0	0	0	0	-1.57304e-16	0	0	0	0	-1.57304e-16	0	-1.57304e-16	-1.57304e-16	0	-1.57304e-16	0.0062292	0.01445	0.0233347	0.0315555	0.0377848	0.0410564
	Share_FOS_in_PP_GasGT	-	1	1	1	1	1	1	1	1	1	1	1	1	1	1	1	1	1	1	1	1	1	1	1	1	1	1	1	1	1	1	1	1	1	1	1	1	1	1	1	1	1	0.993771	0.98555	0.976665	0.968444	0.962215	0.958944
	Share_BIO+EE-CH4_in_PP_GasGT	-	0	0	0	0	0	0	0	0	0	0	0	0	0	0	0	0	0	0	0	0	0	0	0	0	0	0	0	0	0	0	0	0	0	0	0	0	0	0	0	0	0	0	0	0	0	0	0
	Share_H2_in_PP_GasGT	-	0	0	0	1.39236e-16	1.67084e-16	0	1.39236e-16	0	0	0	0	0	0	0	0	0	0	0	0	0	0	0	0	0	0	0	0	-1.78033e-16	-1.79138e-16	0	0	0	0	0	-1.82925e-16	0	0	0	-1.79479e-16	0	-1.78476e-16	0.0062292	0.01445	0.0233347	0.0315555	0.0377848	0.0410564
	Share_FOS_in_CHP_reg_Gas_noCCS	-	1	1	1	1	1	1	1	1	1	1	1	1	1	1	1	1	1	1	1	1	1	0.999992	0.999981	0.999973	0.999977	1	1.00004	1.00009	1.00011	1.00009	1	0.999832	0.999658	0.999569	0.999653	1	1.00063	1.00128	1.00161	1.0013	1	0.997494	0.993962	0.989691	0.984968	0.980081	0.975303
	Share_BIO+EE-CH4_in_CHP_reg_Gas_noCCS	-	0	0	0	0	0	0	0	0	0	0	0	0	0	0	0	0	0	0	0	0	0	0	0	0	0	0	0	0	0	0	0	0	0	0	0	0	0	0	0	0	0	0	0	0	0	0	0
	Share_H2_in_CHP_reg_Gas_noCCS	-	0	0	0	0	0	0	0	0	0	0	0	0	0	0	0	0	0	0	0	0	0	7.64395e-06	1.90213e-05	2.65767e-05	2.27547e-05	0	-4.39452e-05	-9.01481e-05	-0.000114378	-9.24059e-05	0	0.000168137	0.000341571	0.000430937	0.000346869	0	-0.000628602	-0.00127614	-0.00160937	-0.00129507	0	0.00250563	0.00603781	0.0103091	0.0150321	0.0199193	0.0246968
	Share_FOS_in_CHP_reg_Gas_CCS	-	1	1	1	1	1	1	1	1	1	1	1	1	1	1	1	1	1	1	1	1	1	0.999992	0.999981	0.999973	0.999977	1	1.00004	1.00009	1.00011	1.00009	1	0.999832	0.999658	0.999569	0.999653	1	1.00063	1.00128	1.00161	1.0013	1	0.997494	0.993962	0.989691	0.984968	0.980081	0.975303
	Share_BIO+EE-CH4_in_CHP_reg_Gas_CCS	-	0	0	0	0	0	0	0	0	0	0	0	0	0	0	0	0	0	0	0	0	0	0	0	0	0	0	0	0	0	0	0	0	0	0	0	0	0	0	0	0	0	0	0	0	0	0	0
	Share_H2_in_CHP_reg_Gas_CCS	-	0	0	0	0	0	0	0	0	0	0	0	0	0	0	0	0	0	0	0	0	0	7.64395e-06	1.90213e-05	2.65767e-05	2.27547e-05	0	-4.39452e-05	-9.01481e-05	-0.000114378	-9.24059e-05	0	0.000168137	0.000341571	0.000430937	0.000346869	0	-0.000628602	-0.00127614	-0.00160937	-0.00129507	0	0.00250563	0.00603781	0.0103091	0.0150321	0.0199193	0.0246968
	Share_FOS_in_PC_Diesel	-	0.991066	0.987449	0.980682	0.97147	0.965547	0.932848	0.880828	0.860008	0.899784	0.921022	0.922607	0.928391	0.927068	0.938278	0.936643	0.935	0.9256	0.9162	0.9068	0.8974	0.888	0.87969	0.872627	0.866619	0.861474	0.857	0.85299	0.849172	0.845259	0.840964	0.836	0.830195	0.823838	0.817333	0.811086	0.8055	0.800767	0.796226	0.791001	0.784217	0.775	0.762712	0.747667	0.730416	0.71151	0.6915	0.671049
	Share_BIO_in_PC_Diesel	-	0.00893417	0.0125509	0.0193178	0.0285302	0.0344533	0.0671524	0.119172	0.139992	0.100216	0.0789785	0.0773927	0.071609	0.0729315	0.0617221	0.0633567	0.065	0.0744	0.0838	0.0932	0.1026	0.112	0.12031	0.127373	0.133381	0.138526	0.143	0.14701	0.150828	0.154741	0.159036	0.164	0.169805	0.176162	0.182667	0.188914	0.1945	0.199233	0.203774	0.208999	0.215783	0.225	0.237288	0.252333	0.269584	0.28849	0.3085	0.328951
	Share_FOS_in_PC_Diesel_PHEV	-	0.651666	0.639501	0.631449	0.614823	0.607087	0.580372	0.54503	0.528354	0.544716	0.559392	0.559061	0.559729	0.558617	0.568951	0.56555	0.563163	0	0	0	0	0.537069	0.532507	0.528701	0.525537	0.522899	0.520673	0.518734	0.516917	0.515049	0.512953	0.510455	0.507447	0.504106	0.500678	0.497412	0.494555	0.492228	0.490025	0.487407	0.483834	0.478762	0.47179	0.463105	0.453043	0.441938	0.430129	0.418024
	Share_BIO_in_PC_Diesel_PHEV	-	0.00587458	0.00812836	0.0124385	0.0180562	0.0216625	0.0417789	0.0737399	0.0860056	0.060669	0.0479684	0.0468967	0.0431732	0.0439458	0.0374269	0.0382551	0.0391504	0	0	0	0	0.0677384	0.0728278	0.0771718	0.0808853	0.0840829	0.0868801	0.0894022	0.0918138	0.0942896	0.0970053	0.100137	0.103792	0.107794	0.111897	0.115855	0.119418	0.122467	0.12541	0.128783	0.13313	0.138995	0.146779	0.156295	0.167211	0.179189	0.191894	0.204917
	Share_EL_in_PC_Diesel_PHEV	-	0.34246	0.35237	0.356112	0.367121	0.37125	0.37785	0.381231	0.385641	0.394615	0.392639	0.394042	0.397097	0.397437	0.393622	0.396195	0.397686	1	1	1	1	0.395193	0.394665	0.394127	0.393578	0.393018	0.392447	0.391864	0.391269	0.390662	0.390041	0.389408	0.388761	0.3881	0.387424	0.386733	0.386027	0.385305	0.384566	0.383809	0.383035	0.382242	0.381431	0.380599	0.379747	0.378873	0.377977	0.377059
	Share_FOS_in_PC_Otto	-	1	1	1	1	0.998369	0.993543	0.985195	0.986136	0.980301	0.971047	0.960375	0.958462	0.955325	0.956814	0.956195	0.955	0.9526	0.9502	0.9478	0.9454	0.943	0.938523	0.93215	0.924817	0.917455	0.911	0.906145	0.902623	0.899929	0.897557	0.895	0.891871	0.888254	0.884351	0.880366	0.8765	0.872892	0.869422	0.865906	0.86216	0.858	0.853282	0.84802	0.842266	0.836075	0.8295	0.82266
	Share_BIO_in_PC_Otto	-	0	0	0	0	0.00163099	0.00645722	0.0148048	0.0138641	0.0196988	0.0289527	0.0396247	0.0415383	0.0446749	0.0431864	0.0438046	0.045	0.0474	0.0498	0.0522	0.0546	0.057	0.0614772	0.0678496	0.0751833	0.0825447	0.089	0.0938554	0.0973771	0.100071	0.102443	0.105	0.108129	0.111746	0.115649	0.119634	0.1235	0.127108	0.130578	0.134094	0.13784	0.142	0.146718	0.15198	0.157734	0.163925	0.1705	0.17734
	Share_FOS_in_PC_Otto_PHEV	-	0	0	0	0	0	0	0.631268	0.627625	0.615313	0.611381	0.603344	0.599276	0.596998	0.601499	0.598704	0.596562	0.59551	0.594465	0.593426	0.592393	0.591367	0.589043	0.585535	0.581425	0.577299	0.573746	0.571204	0.569509	0.568344	0.56739	0.566328	0.564912	0.563194	0.561304	0.559368	0.557517	0.555838	0.554255	0.552653	0.550914	0.54892	0.546577	0.543895	0.540905	0.537642	0.534138	0.530471
	Share_BIO_in_PC_Otto_PHEV	-	0	0	0	0	0	0	0.00948623	0.0088238	0.0123645	0.0182289	0.0248937	0.0259717	0.0279181	0.0271491	0.0274275	0.0281102	0.0296317	0.0311559	0.0326829	0.0342127	0.0357454	0.0385849	0.04262	0.0472671	0.0519404	0.056052	0.0591634	0.06144	0.0631992	0.0647595	0.0664407	0.068489	0.0708523	0.073403	0.0760133	0.0785548	0.0809396	0.0832436	0.0855841	0.088079	0.0908469	0.0939815	0.0974756	0.101297	0.105412	0.10979	0.114353
	Share_EL_in_PC_Otto_PHEV	-	1	1	1	1	1	1	0.359246	0.363551	0.372322	0.37039	0.371763	0.374752	0.375084	0.371352	0.373868	0.375328	0.374858	0.374379	0.373892	0.373395	0.372888	0.372372	0.371845	0.371308	0.370761	0.370202	0.369632	0.369051	0.368457	0.367851	0.367232	0.366599	0.365953	0.365293	0.364618	0.363928	0.363223	0.362501	0.361763	0.361007	0.360233	0.359441	0.35863	0.357798	0.356946	0.356072	0.355176
	Share_FOS_in_PC_Gas	-	1	1	1	1	1	1	1	1	1	1	1	1	1	1	1	1	1	1	1	1	1	1	1	1	1	1	1	1	1	1	1	1	1	1	1	1	1	1	1	1	1	1	1	1	1	1	1
	Share_BIO+EE-CH4_in_PC_Gas	-	0	0	0	0	0	0	0	0	0	0	0	0	0	0	0	0	0	0	0	0	0	0	0	0	0	0	0	0	0	0	0	0	0	0	0	0	0	0	0	0	0	0	0	0	0	0	0
	Share_H2_in_PC_Gas	-	0	0	0	0	0	0	0	0	0	0	0	0	0	0	0	0	0	0	0	0	0	0	0	0	0	0	0	0	0	0	0	0	0	0	0	0	0	0	0	0	0	0	0	0	0	0	0
	Share_FOS_in_LDV_Otto	-	1	1	1	1	0.998369	0.993543	0.985195	0.986136	0.980301	0.971047	0.960375	0.958462	0.955325	0.956814	0.956195	0.955	0.9526	0.9502	0.9478	0.9454	0.943	0.938523	0.93215	0.924817	0.917455	0.911	0.906145	0.902623	0.899929	0.897557	0.895	0.891871	0.888254	0.884351	0.880366	0.8765	0.872892	0.869422	0.865906	0.86216	0.858	0.853282	0.84802	0.842266	0.836075	0.8295	0.82266
	Share_BIO_in_LDV_Otto	-	0	0	0	0	0.00163099	0.00645722	0.0148048	0.0138641	0.0196988	0.0289527	0.0396247	0.0415383	0.0446749	0.0431864	0.0438046	0.045	0.0474	0.0498	0.0522	0.0546	0.057	0.0614772	0.0678496	0.0751833	0.0825447	0.089	0.0938554	0.0973771	0.100071	0.102443	0.105	0.108129	0.111746	0.115649	0.119634	0.1235	0.127108	0.130578	0.134094	0.13784	0.142	0.146718	0.15198	0.157734	0.163925	0.1705	0.17734
	Share_FOS_in_LDV_Otto_PHEV	-	0.770659	0.770659	0.770659	0.770659	0.769402	0.765683	0.75674	0.754169	0.742989	0.737447	0.728309	0.724606	0.721985	0.725916	0.723557	0.721556	0.720095	0.718639	0.717187	0.715741	0.714299	0.71128	0.706831	0.701659	0.696472	0.691979	0.688688	0.686419	0.684788	0.683411	0.681905	0.679973	0.677672	0.675157	0.672582	0.670101	0.667821	0.665649	0.663447	0.661072	0.658384	0.655327	0.65185	0.647992	0.643795	0.639297	0.634591
	Share_BIO_in_LDV_Otto_PHEV	-	0	0	0	0	0.00125694	0.00497632	0.0113717	0.0106029	0.0149301	0.0219877	0.0300497	0.0314033	0.033763	0.0327647	0.0331472	0.034	0.0358309	0.0376639	0.039499	0.0413364	0.0431761	0.0465918	0.051449	0.0570416	0.0626625	0.0676028	0.071332	0.0740524	0.0761475	0.0780016	0.08	0.0824389	0.0852541	0.0882919	0.0913981	0.0944181	0.0972463	0.0999739	0.102742	0.105691	0.108963	0.11268	0.116823	0.121351	0.126225	0.131405	0.136798
	Share_EL_in_LDV_Otto_PHEV	-	0.229341	0.229341	0.229341	0.229341	0.229341	0.229341	0.231888	0.235228	0.242081	0.240565	0.241641	0.243991	0.244252	0.241319	0.243296	0.244444	0.244074	0.243697	0.243314	0.242923	0.242525	0.242129	0.24172	0.2413	0.240866	0.240418	0.23998	0.239529	0.239065	0.238587	0.238095	0.237588	0.237073	0.236551	0.23602	0.235481	0.234933	0.234377	0.233811	0.233237	0.232653	0.231993	0.231327	0.230656	0.22998	0.229298	0.228611
	Share_FOS_in_LDV_Diesel	-	0.990191	0.986225	0.978812	0.968736	0.962268	0.926693	0.870567	0.848263	0.890954	0.913883	0.915599	0.921862	0.920429	0.932585	0.930811	0.929028	0.918839	0.908669	0.898518	0.888385	0.878271	0.869346	0.861771	0.855336	0.849831	0.845049	0.840765	0.836691	0.832518	0.827942	0.822657	0.816483	0.80973	0.802829	0.796209	0.790298	0.785294	0.780496	0.774982	0.767831	0.75813	0.745223	0.729462	0.711447	0.691772	0.671026	0.649905
	Share_BIO_in_LDV_Diesel	-	0.0098091	0.0137751	0.0211878	0.0312637	0.0377322	0.073307	0.129433	0.151737	0.109046	0.0861169	0.0844009	0.0781378	0.0795706	0.067415	0.0691893	0.0709723	0.081161	0.091331	0.101482	0.111615	0.121729	0.130654	0.138229	0.144664	0.150169	0.154951	0.159235	0.163309	0.167482	0.172058	0.177343	0.183517	0.19027	0.197171	0.203791	0.209702	0.214706	0.219504	0.225018	0.232169	0.24187	0.254777	0.270538	0.288553	0.308228	0.328974	0.350095
	Share_FOS_in_LDV_Gas	-	1	1	1	1	1	1	1	1	1	1	1	1	1	1	1	0	0	0	0	0	0	0	0	0	0	0	0	0	0	0	0	0	0	0	0	0	0	0	0	0	0	0	0	0	0	0	0
	Share_BIO+EE-CH4_in_LDV_Gas	-	0	0	0	0	0	0	0	0	0	0	0	0	0	0	0	0	0	0	0	0	0	0	0	0	0	0	0	0	0	0	0	0	0	0	0	0	0	0	0	0	0	0	0	0	0	0	0
	Share_H2_in_LDV_Gas	-	0	0	0	0	0	0	0	0	0	0	0	0	0	0	0	0	0	0	0	0	0	0	0	0	0	0	0	0	0	0	0	0	0	0	0	0	0	0	0	0	0	0	0	0	0	0	0
	Share_FOS_in_HDV_Diesel	-	0.990191	0.986225	0.978812	0.968736	0.962268	0.926693	0.870567	0.848263	0.890954	0.913883	0.915599	0.921862	0.920429	0.932585	0.930811	0.929028	0.918839	0.908669	0.898518	0.888385	0.878271	0.869346	0.861771	0.855336	0.849831	0.845049	0.840765	0.836691	0.832518	0.827942	0.822657	0.816483	0.80973	0.802829	0.796209	0.790298	0.785294	0.780496	0.774982	0.767831	0.75813	0.745223	0.729462	0.711447	0.691772	0.671026	0.649905
	Share_BIO+SYN_in_HDV_Diesel	-	0.0098091	0.0137751	0.0211878	0.0312637	0.0377322	0.073307	0.129433	0.151737	0.109046	0.0861169	0.0844009	0.0781378	0.0795706	0.067415	0.0691893	0.0709723	0.081161	0.091331	0.101482	0.111615	0.121729	0.130654	0.138229	0.144664	0.150169	0.154951	0.159235	0.163309	0.167482	0.172058	0.177343	0.183517	0.19027	0.197171	0.203791	0.209702	0.214706	0.219504	0.225018	0.232169	0.24187	0.254777	0.270538	0.288553	0.308228	0.328974	0.350095
	Share_FOS_in_HDV_Diesel_PHEV	-	1	1	1	1	1	1	1	1	1	1	1	1	1	1	1	1	0.803428	0.795483	0.787538	0.779591	0.771644	0.764639	0.758721	0.753723	0.749479	0.745824	0.742565	0.739478	0.736313	0.732819	0.728747	0.723946	0.718664	0.713253	0.708066	0.703456	0.699593	0.695897	0.691605	0.68595	0.678165	0.66772	0.654853	0.640043	0.62377	0.606516	0.588859
	Share_BIO+SYN_in_HDV_Diesel_PHEV	-	0	0	0	0	0	0	0	0	0	0	0	0	0	0	0	0	0.0645798	0.0727587	0.0809423	0.0891309	0.0973245	0.104575	0.110747	0.116005	0.120517	0.124449	0.127979	0.131345	0.134796	0.138584	0.14296	0.148074	0.153673	0.159406	0.164919	0.16986	0.17406	0.178097	0.182737	0.188744	0.196887	0.207735	0.221009	0.236229	0.252915	0.270586	0.288662
	Share_EL_in_HDV_Diesel_PHEV	-	0	0	0	0	0	0	0	0	0	0	0	0	0	0	0	0	0.131992	0.131758	0.13152	0.131278	0.131031	0.130785	0.130533	0.130272	0.130004	0.129727	0.129456	0.129177	0.128891	0.128596	0.128293	0.12798	0.127663	0.127342	0.127015	0.126684	0.126347	0.126006	0.125659	0.125307	0.124949	0.124545	0.124137	0.123727	0.123314	0.122898	0.12248
	Share_FOS_in_HDV_Gas	-	1	1	1	1	1	1	1	1	1	1	1	1	1	1	1	1	1	1	1	1	1	1	1	1	1	1	1	1	1	1	1	1	1	1	1	1	1	1	1	1	1	1	1	1	1	1	1
	Share_BIO+EE-CH4_in_HDV_Gas	-	0	0	0	0	0	0	0	0	0	0	0	0	0	0	0	0	0	0	0	0	0	0	0	0	0	0	0	0	0	0	0	0	0	0	0	0	0	0	0	0	0	0	0	0	0	0	0
	Share_H2_in_HDV_Gas	-	0	0	0	0	0	0	0	0	0	0	0	0	0	0	0	0	0	0	0	0	0	0	0	0	0	0	0	0	0	0	0	0	0	0	0	0	0	0	0	0	0	0	0	0	0	0	0
	Share_FOS_in_TrG_Diesel	-	1	1	1	1	1	0.944521	0.96908	0.953403	0.948698	0.929898	0.933378	0.929222	0.930424	0.938022	0.930412	0.929028	0.925774	0.922522	0.919272	0.916024	0.912778	0.904031	0.890341	0.874263	0.85833	0.845049	0.836238	0.831069	0.828063	0.825748	0.822657	0.817691	0.81123	0.804017	0.796794	0.790298	0.784972	0.780097	0.774665	0.767675	0.75813	0.745309	0.729568	0.711531	0.691813	0.671026	0.649882
	Share_BIO_in_TrG_Diesel	-	0	0	0	0	0	0.055479	0.0309199	0.0465968	0.0513018	0.0701022	0.0666215	0.0707784	0.0695755	0.0619779	0.0695882	0.0709723	0.0742261	0.0774779	0.0807279	0.0839759	0.087222	0.095969	0.109659	0.125737	0.14167	0.154951	0.163762	0.168931	0.171937	0.174252	0.177343	0.182309	0.18877	0.195983	0.203206	0.209702	0.215028	0.219903	0.225335	0.232325	0.24187	0.254691	0.270432	0.288469	0.308187	0.328974	0.350118
	Share_FOS_in_TrP_Diesel	-	1	1	1	1	1	0.94638	0.970142	0.954978	0.950424	0.932211	0.935585	0.931556	0.932722	0.940085	0.932709	0.931368	0.928213	0.925059	0.921907	0.918755	0.915605	0.907113	0.89381	0.878172	0.862657	0.849709	0.841114	0.836069	0.833134	0.830874	0.827854	0.823003	0.816687	0.809634	0.802567	0.796208	0.790993	0.786217	0.780894	0.774041	0.764677	0.75209	0.73662	0.718872	0.699444	0.678933	0.658038
	Share_BIO_in_TrP_Diesel	-	0	0	0	0	0	0.0536203	0.0298581	0.0450216	0.0495757	0.0677888	0.064415	0.0684444	0.0672782	0.0599153	0.0672905	0.0686323	0.0717871	0.0749408	0.0780933	0.0812446	0.0843949	0.0928872	0.10619	0.121828	0.137343	0.150291	0.158886	0.163931	0.166866	0.169126	0.172146	0.176997	0.183313	0.190366	0.197433	0.203792	0.209007	0.213783	0.219106	0.225959	0.235323	0.24791	0.26338	0.281128	0.300556	0.321067	0.341962
	Share_FOS_in_NavIn	-	1	1	1	1	1	0.940628	0.969066	0.953343	0.948518	0.929886	0.939003	0.934148	0.923347	1	1	0.923606	0.923606	0.923606	0.923606	0.923606	0.923606	0.922712	0.920817	0.918286	0.915485	0.912778	0.910438	0.908372	0.906395	0.904323	0.901971	0.899207	0.896093	0.892746	0.889277	0.885801	0.882411	0.879115	0.875902	0.87276	0.869679	0.866636	0.863574	0.860426	0.857124	0.853603	0.849853
	Share_BIO+SYN_in_NavIn	-	0	0	0	0	0	0.0593722	0.0309345	0.0466568	0.0514824	0.0701136	0.0609969	0.0658517	0.0766526	0	0	0.0763942	0.0763942	0.0763942	0.0763942	0.0763942	0.0763942	0.0772882	0.0791835	0.0817143	0.0845153	0.087222	0.0895617	0.0916278	0.0936048	0.0956771	0.0980285	0.100793	0.103907	0.107254	0.110723	0.114199	0.117589	0.120885	0.124098	0.12724	0.130321	0.133364	0.136426	0.139574	0.142876	0.146397	0.150147
	Share_FOS_in_NavC	-	1	1	1	1	1	0.940628	0.969066	0.953343	0.948518	0.929886	0.939003	0.934148	0.916029	1	1	0.923606	0.923606	0.923606	0.923606	0.923606	0.923606	0.922712	0.920817	0.918286	0.915485	0.912778	0.910438	0.908372	0.906395	0.904323	0.901971	0.899207	0.896093	0.892746	0.889277	0.885801	0.882411	0.879115	0.875902	0.87276	0.869679	0.866636	0.863574	0.860426	0.857124	0.853603	0.849853
	Share_BIO+SYN_in_NavC	-	0	0	0	0	0	0.0593722	0.0309345	0.0466568	0.0514824	0.0701136	0.0609969	0.0658517	0.0839712	0	0	0.0763942	0.0763942	0.0763942	0.0763942	0.0763942	0.0763942	0.0772882	0.0791835	0.0817143	0.0845153	0.087222	0.0895617	0.0916278	0.0936048	0.0956771	0.0980285	0.100793	0.103907	0.107254	0.110723	0.114199	0.117589	0.120885	0.124098	0.12724	0.130321	0.133364	0.136426	0.139574	0.142876	0.146397	0.150147
	Share_FOS_in_AviP	-	1	1	1	1	1	1	1	1	1	1	1	1	1	1	1	1	0.999642	0.999283	0.998922	0.998559	0.998194	0.997608	0.996555	0.994799	0.992105	0.988237	0.982949	0.976412	0.968842	0.960457	0.951483	0.942452	0.933268	0.924028	0.914835	0.905787	0.896935	0.888113	0.879107	0.869696	0.859663	0.849213	0.83796	0.825898	0.813017	0.79931	0.784936
	Share_BIO+SYN_in_AviP	-	0	0	0	0	0	0	0	0	0	0	0	0	0	0	0	0	0.000357783	0.000717248	0.00107846	0.00144149	0.00180642	0.0023919	0.00344533	0.00520124	0.00789495	0.0117629	0.0170508	0.0235875	0.0311583	0.0395432	0.0485165	0.0575477	0.0667325	0.0759716	0.0851652	0.0942126	0.103065	0.111887	0.120893	0.130304	0.140337	0.150787	0.16204	0.174102	0.186983	0.20069	0.215064
	Share_FOS_in_AviG	-	1	1	1	1	1	1	1	1	1	1	1	1	1	1	1	1	0.9996	0.9992	0.9988	0.9984	0.998	0.997352	0.996187	0.994246	0.99127	0.987	0.981264	0.974236	0.966176	0.957344	0.948	0.938379	0.928612	0.918805	0.909066	0.8995	0.890157	0.880865	0.871394	0.861515	0.851	0.839656	0.82744	0.814347	0.800369	0.7855	0.769914
	Share_BIO+SYN_in_AviG	-	0	0	0	0	0	0	0	0	0	0	0	0	0	0	0	0	0.0004	0.0008	0.0012	0.0016	0.002	0.00264768	0.00381278	0.00575403	0.00873019	0.013	0.0187357	0.0257637	0.0338239	0.042656	0.052	0.0616214	0.0713883	0.0811945	0.0909338	0.1005	0.109843	0.119135	0.128606	0.138485	0.149	0.160344	0.17256	0.185653	0.199631	0.2145	0.230086
	Share_FOS_in_BUS_Diesel	-	0.991066	0.987449	0.980682	0.97147	0.965547	0.932848	0.880828	0.860008	0.899784	0.921022	0.922607	0.928391	0.927068	0.938278	0.936643	0.935	0.9256	0.9162	0.9068	0.8974	0.888	0.87969	0.872627	0.866619	0.861474	0.857	0.85299	0.849172	0.845259	0.840964	0.836	0.830195	0.823838	0.817333	0.811086	0.8055	0.800767	0.796226	0.791001	0.784217	0.775	0.762712	0.747667	0.730416	0.71151	0.6915	0.671049
	Share_BIO_in_BUS_Diesel	-	0.00893417	0.0125509	0.0193178	0.0285302	0.0344533	0.0671524	0.119172	0.139992	0.100216	0.0789785	0.0773927	0.071609	0.0729315	0.0617221	0.0633567	0.065	0.0744	0.0838	0.0932	0.1026	0.112	0.12031	0.127373	0.133381	0.138526	0.143	0.14701	0.150828	0.154741	0.159036	0.164	0.169805	0.176162	0.182667	0.188914	0.1945	0.199233	0.203774	0.208999	0.215783	0.225	0.237288	0.252333	0.269584	0.28849	0.3085	0.328951
	Share_FOS_in_BUS_Diesel_PHEV	-	1	1	1	1	1	1	1	1	1	1	1	1	1	1	1	1	0.5785	0.572625	0.56675	0.560875	0.555	0.549806	0.545392	0.541637	0.538421	0.535625	0.533119	0.530732	0.528287	0.525603	0.5225	0.518872	0.514898	0.510833	0.506929	0.503438	0.50048	0.497641	0.494376	0.490136	0.484375	0.476695	0.467292	0.45651	0.444693	0.432188	0.419405
	Share_BIO_in_BUS_Diesel_PHEV	-	0	0	0	0	0	0	0	0	0	0	0	0	0	0	0	0	0.0465	0.052375	0.05825	0.064125	0.07	0.0751936	0.0796081	0.0833632	0.0865789	0.089375	0.0918814	0.0942676	0.0967131	0.0993974	0.1025	0.106128	0.110102	0.114167	0.118071	0.121563	0.12452	0.127359	0.130624	0.134864	0.140625	0.148305	0.157708	0.16849	0.180307	0.192813	0.205595
	Share_EL_in_BUS_Diesel_PHEV	-	0	0	0	0	0	0	0	0	0	0	0	0	0	0	0	0	0.375	0.375	0.375	0.375	0.375	0.375	0.375	0.375	0.375	0.375	0.375	0.375	0.375	0.375	0.375	0.375	0.375	0.375	0.375	0.375	0.375	0.375	0.375	0.375	0.375	0.375	0.375	0.375	0.375	0.375	0.375
	Share_FOS_in_BUS_Gas	-	1	1	1	1	1	1	1	1	1	1	1	1	1	1	1	1	1	1	1	1	1	1	1	1	1	1	1	1	1	1	1	1	1	1	1	1	1	1	1	1	1	1	1	1	1	1	1
	Share_BIO+EE-CH4_in_BUS_Gas	-	0	0	0	0	0	0	0	0	0	0	0	0	0	0	0	0	0	0	0	0	0	0	0	0	0	0	0	0	0	0	0	0	0	0	0	0	0	0	0	0	0	0	0	0	0	0	0
	Share_H2_in_BUS_Gas	-	0	0	0	0	0	0	0	0	0	0	0	0	0	0	0	0	0	0	0	0	0	0	0	0	0	0	0	0	0	0	0	0	0	0	0	0	0	0	0	0	0	0	0	0	0	0	0
	Share_FOS_in_MC_Otto	-	1	1	1	1	0.998369	0.993543	0.985195	0.986136	0.980301	0.971047	0.960375	0.958462	0.955325	0.956814	0.956195	0.955	0.9526	0.9502	0.9478	0.9454	0.943	0.938523	0.93215	0.924817	0.917455	0.911	0.906145	0.902623	0.899929	0.897557	0.895	0.891871	0.888254	0.884351	0.880366	0.8765	0.872892	0.869422	0.865906	0.86216	0.858	0.853282	0.84802	0.842266	0.836075	0.8295	0.82266
	Share_BIO_in_MC_Otto	-	0	0	0	0	0.00163099	0.00645722	0.0148048	0.0138641	0.0196988	0.0289527	0.0396247	0.0415383	0.0446749	0.0431864	0.0438046	0.045	0.0474	0.0498	0.0522	0.0546	0.057	0.0614772	0.0678496	0.0751833	0.0825447	0.089	0.0938554	0.0973771	0.100071	0.102443	0.105	0.108129	0.111746	0.115649	0.119634	0.1235	0.127108	0.130578	0.134094	0.13784	0.142	0.146718	0.15198	0.157734	0.163925	0.1705	0.17734
Exogenously predefined subtechnology scenario	Share_SHHW_IND_Solar1	-	0.08	0.08	0.08	0.08	0.08	0.08	0.08	0.08	0.08	0.08	0.08	0.08	0.08	0.08	0.08	0.08	0.08	0.08	0.08	0.08	0.08	0.08	0.08	0.08	0.08	0.08	0.08	0.08	0.08	0.08	0.08	0.08	0.08	0.08	0.08	0.08	0.08	0.08	0.08	0.08	0.08	0.08	0.08	0.08	0.08	0.08	0.08
	Share_SHHW_IND_Solar2	-	0.08	0.08	0.08	0.08	0.08	0.08	0.08	0.08	0.08	0.08	0.08	0.08	0.08	0.08	0.08	0.08	0.08	0.08	0.08	0.08	0.08	0.08	0.08	0.08	0.08	0.08	0.08	0.08	0.08	0.08	0.08	0.08	0.08	0.08	0.08	0.08	0.08	0.08	0.08	0.08	0.08	0.08	0.08	0.08	0.08	0.08	0.08
	Share_SHHW_IND_Solar3	-	0.84	0.84	0.84	0.84	0.84	0.84	0.84	0.84	0.84	0.84	0.84	0.84	0.84	0.84	0.84	0.84	0.84	0.84	0.84	0.84	0.84	0.84	0.84	0.84	0.84	0.84	0.84	0.84	0.84	0.84	0.84	0.84	0.84	0.84	0.84	0.84	0.84	0.84	0.84	0.84	0.84	0.84	0.84	0.84	0.84	0.84	0.84
	Share_SHHW_IND_HP1	-	0.1	0.1	0.1	0.1	0.1	0.1	0.1	0.1	0.1	0.1	0.1	0.1	0.1	0.1	0.1	0.1	0.1	0.1	0.1	0.1	0.1	0.1	0.1	0.1	0.1	0.1	0.1	0.1	0.1	0.1	0.1	0.1	0.1	0.1	0.1	0.1	0.1	0.1	0.1	0.1	0.1	0.1	0.1	0.1	0.1	0.1	0.1
	Share_SHHW_IND_HP2	-	0.7	0.7	0.7	0.7	0.7	0.7	0.7	0.7	0.7	0.7	0.7	0.7	0.7	0.7	0.7	0.7	0.7	0.7	0.7	0.7	0.7	0.7	0.7	0.7	0.7	0.7	0.7	0.7	0.7	0.7	0.7	0.7	0.7	0.7	0.7	0.7	0.7	0.7	0.7	0.7	0.7	0.7	0.7	0.7	0.7	0.7	0.7
	Share_SHHW_IND_HP3	-	0.1	0.1	0.1	0.1	0.1	0.1	0.1	0.1	0.1	0.1	0.1	0.1	0.1	0.1	0.1	0.1	0.1	0.1	0.1	0.1	0.1	0.1	0.1	0.1	0.1	0.1	0.1	0.1	0.1	0.1	0.1	0.1	0.1	0.1	0.1	0.1	0.1	0.1	0.1	0.1	0.1	0.1	0.1	0.1	0.1	0.1	0.1
	Share_SHHW_IND_HP4	-	0.1	0.1	0.1	0.1	0.1	0.1	0.1	0.1	0.1	0.1	0.1	0.1	0.1	0.1	0.1	0.1	0.1	0.1	0.1	0.1	0.1	0.1	0.1	0.1	0.1	0.1	0.1	0.1	0.1	0.1	0.1	0.1	0.1	0.1	0.1	0.1	0.1	0.1	0.1	0.1	0.1	0.1	0.1	0.1	0.1	0.1	0.1
	Share_PH_IND_Solar1	-	0.08	0.08	0.08	0.08	0.08	0.08	0.08	0.08	0.08	0.08	0.08	0.08	0.08	0.08	0.08	0.08	0.08	0.08	0.08	0.08	0.08	0.08	0.08	0.08	0.08	0.08	0.08	0.08	0.08	0.08	0.08	0.08	0.08	0.08	0.08	0.08	0.08	0.08	0.08	0.08	0.08	0.08	0.08	0.08	0.08	0.08	0.08
	Share_PH_IND_Solar2	-	0.08	0.08	0.08	0.08	0.08	0.08	0.08	0.08	0.08	0.08	0.08	0.08	0.08	0.08	0.08	0.08	0.08	0.08	0.08	0.08	0.08	0.08	0.08	0.08	0.08	0.08	0.08	0.08	0.08	0.08	0.08	0.08	0.08	0.08	0.08	0.08	0.08	0.08	0.08	0.08	0.08	0.08	0.08	0.08	0.08	0.08	0.08
	Share_PH_IND_Solar3	-	0.84	0.84	0.84	0.84	0.84	0.84	0.84	0.84	0.84	0.84	0.84	0.84	0.84	0.84	0.84	0.84	0.84	0.84	0.84	0.84	0.84	0.84	0.84	0.84	0.84	0.84	0.84	0.84	0.84	0.84	0.84	0.84	0.84	0.84	0.84	0.84	0.84	0.84	0.84	0.84	0.84	0.84	0.84	0.84	0.84	0.84	0.84
	Share_PH_IND_HP1	-	0.1	0.1	0.1	0.1	0.1	0.1	0.1	0.1	0.1	0.1	0.1	0.1	0.1	0.1	0.1	0.1	0.1	0.1	0.1	0.1	0.1	0.1	0.1	0.1	0.1	0.1	0.1	0.1	0.1	0.1	0.1	0.1	0.1	0.1	0.1	0.1	0.1	0.1	0.1	0.1	0.1	0.1	0.1	0.1	0.1	0.1	0.1
	Share_PH_IND_HP2	-	0.7	0.7	0.7	0.7	0.7	0.7	0.7	0.7	0.7	0.7	0.7	0.7	0.7	0.7	0.7	0.7	0.7	0.7	0.7	0.7	0.7	0.7	0.7	0.7	0.7	0.7	0.7	0.7	0.7	0.7	0.7	0.7	0.7	0.7	0.7	0.7	0.7	0.7	0.7	0.7	0.7	0.7	0.7	0.7	0.7	0.7	0.7
	Share_PH_IND_HP3	-	0.1	0.1	0.1	0.1	0.1	0.1	0.1	0.1	0.1	0.1	0.1	0.1	0.1	0.1	0.1	0.1	0.1	0.1	0.1	0.1	0.1	0.1	0.1	0.1	0.1	0.1	0.1	0.1	0.1	0.1	0.1	0.1	0.1	0.1	0.1	0.1	0.1	0.1	0.1	0.1	0.1	0.1	0.1	0.1	0.1	0.1	0.1
	Share_PH_IND_HP4	-	0.1	0.1	0.1	0.1	0.1	0.1	0.1	0.1	0.1	0.1	0.1	0.1	0.1	0.1	0.1	0.1	0.1	0.1	0.1	0.1	0.1	0.1	0.1	0.1	0.1	0.1	0.1	0.1	0.1	0.1	0.1	0.1	0.1	0.1	0.1	0.1	0.1	0.1	0.1	0.1	0.1	0.1	0.1	0.1	0.1	0.1	0.1
	Share_SHHW_SV_Solar1	-	0.08	0.08	0.08	0.08	0.08	0.08	0.08	0.08	0.08	0.08	0.08	0.08	0.08	0.08	0.08	0.08	0.08	0.08	0.08	0.08	0.08	0.08	0.08	0.08	0.08	0.08	0.08	0.08	0.08	0.08	0.08	0.08	0.08	0.08	0.08	0.08	0.08	0.08	0.08	0.08	0.08	0.08	0.08	0.08	0.08	0.08	0.08
	Share_SHHW_SV_Solar2	-	0.08	0.08	0.08	0.08	0.08	0.08	0.08	0.08	0.08	0.08	0.08	0.08	0.08	0.08	0.08	0.08	0.08	0.08	0.08	0.08	0.08	0.08	0.08	0.08	0.08	0.08	0.08	0.08	0.08	0.08	0.08	0.08	0.08	0.08	0.08	0.08	0.08	0.08	0.08	0.08	0.08	0.08	0.08	0.08	0.08	0.08	0.08
	Share_SHHW_SV_Solar3	-	0.84	0.84	0.84	0.84	0.84	0.84	0.84	0.84	0.84	0.84	0.84	0.84	0.84	0.84	0.84	0.84	0.84	0.84	0.84	0.84	0.84	0.84	0.84	0.84	0.84	0.84	0.84	0.84	0.84	0.84	0.84	0.84	0.84	0.84	0.84	0.84	0.84	0.84	0.84	0.84	0.84	0.84	0.84	0.84	0.84	0.84	0.84
	Share_SHHW_SV_HP1	-	0.1	0.1	0.1	0.1	0.1	0.1	0.1	0.1	0.1	0.1	0.1	0.1	0.1	0.1	0.1	0.1	0.1	0.1	0.1	0.1	0.1	0.1	0.1	0.1	0.1	0.1	0.1	0.1	0.1	0.1	0.1	0.1	0.1	0.1	0.1	0.1	0.1	0.1	0.1	0.1	0.1	0.1	0.1	0.1	0.1	0.1	0.1
	Share_SHHW_SV_HP2	-	0.7	0.7	0.7	0.7	0.7	0.7	0.7	0.7	0.7	0.7	0.7	0.7	0.7	0.7	0.7	0.7	0.7	0.7	0.7	0.7	0.7	0.7	0.7	0.7	0.7	0.7	0.7	0.7	0.7	0.7	0.7	0.7	0.7	0.7	0.7	0.7	0.7	0.7	0.7	0.7	0.7	0.7	0.7	0.7	0.7	0.7	0.7
	Share_SHHW_SV_HP3	-	0.1	0.1	0.1	0.1	0.1	0.1	0.1	0.1	0.1	0.1	0.1	0.1	0.1	0.1	0.1	0.1	0.1	0.1	0.1	0.1	0.1	0.1	0.1	0.1	0.1	0.1	0.1	0.1	0.1	0.1	0.1	0.1	0.1	0.1	0.1	0.1	0.1	0.1	0.1	0.1	0.1	0.1	0.1	0.1	0.1	0.1	0.1
	Share_SHHW_SV_HP4	-	0.1	0.1	0.1	0.1	0.1	0.1	0.1	0.1	0.1	0.1	0.1	0.1	0.1	0.1	0.1	0.1	0.1	0.1	0.1	0.1	0.1	0.1	0.1	0.1	0.1	0.1	0.1	0.1	0.1	0.1	0.1	0.1	0.1	0.1	0.1	0.1	0.1	0.1	0.1	0.1	0.1	0.1	0.1	0.1	0.1	0.1	0.1
	Share_PH_SV_Solar1	-	0.08	0.08	0.08	0.08	0.08	0.08	0.08	0.08	0.08	0.08	0.08	0.08	0.08	0.08	0.08	0.08	0.08	0.08	0.08	0.08	0.08	0.08	0.08	0.08	0.08	0.08	0.08	0.08	0.08	0.08	0.08	0.08	0.08	0.08	0.08	0.08	0.08	0.08	0.08	0.08	0.08	0.08	0.08	0.08	0.08	0.08	0.08
	Share_PH_SV_Solar2	-	0.08	0.08	0.08	0.08	0.08	0.08	0.08	0.08	0.08	0.08	0.08	0.08	0.08	0.08	0.08	0.08	0.08	0.08	0.08	0.08	0.08	0.08	0.08	0.08	0.08	0.08	0.08	0.08	0.08	0.08	0.08	0.08	0.08	0.08	0.08	0.08	0.08	0.08	0.08	0.08	0.08	0.08	0.08	0.08	0.08	0.08	0.08
	Share_PH_SV_Solar3	-	0.84	0.84	0.84	0.84	0.84	0.84	0.84	0.84	0.84	0.84	0.84	0.84	0.84	0.84	0.84	0.84	0.84	0.84	0.84	0.84	0.84	0.84	0.84	0.84	0.84	0.84	0.84	0.84	0.84	0.84	0.84	0.84	0.84	0.84	0.84	0.84	0.84	0.84	0.84	0.84	0.84	0.84	0.84	0.84	0.84	0.84	0.84
	Share_PH_SV_HP1	-	0.1	0.1	0.1	0.1	0.1	0.1	0.1	0.1	0.1	0.1	0.1	0.1	0.1	0.1	0.1	0.1	0.1	0.1	0.1	0.1	0.1	0.1	0.1	0.1	0.1	0.1	0.1	0.1	0.1	0.1	0.1	0.1	0.1	0.1	0.1	0.1	0.1	0.1	0.1	0.1	0.1	0.1	0.1	0.1	0.1	0.1	0.1
	Share_PH_SV_HP2	-	0.7	0.7	0.7	0.7	0.7	0.7	0.7	0.7	0.7	0.7	0.7	0.7	0.7	0.7	0.7	0.7	0.7	0.7	0.7	0.7	0.7	0.7	0.7	0.7	0.7	0.7	0.7	0.7	0.7	0.7	0.7	0.7	0.7	0.7	0.7	0.7	0.7	0.7	0.7	0.7	0.7	0.7	0.7	0.7	0.7	0.7	0.7
	Share_PH_SV_HP3	-	0.1	0.1	0.1	0.1	0.1	0.1	0.1	0.1	0.1	0.1	0.1	0.1	0.1	0.1	0.1	0.1	0.1	0.1	0.1	0.1	0.1	0.1	0.1	0.1	0.1	0.1	0.1	0.1	0.1	0.1	0.1	0.1	0.1	0.1	0.1	0.1	0.1	0.1	0.1	0.1	0.1	0.1	0.1	0.1	0.1	0.1	0.1
	Share_PH_SV_HP4	-	0.1	0.1	0.1	0.1	0.1	0.1	0.1	0.1	0.1	0.1	0.1	0.1	0.1	0.1	0.1	0.1	0.1	0.1	0.1	0.1	0.1	0.1	0.1	0.1	0.1	0.1	0.1	0.1	0.1	0.1	0.1	0.1	0.1	0.1	0.1	0.1	0.1	0.1	0.1	0.1	0.1	0.1	0.1	0.1	0.1	0.1	0.1
	Share_SH_RES_HP1	-	0.1	0.1	0.1	0.1	0.1	0.1	0.1	0.1	0.1	0.1	0.1	0.1	0.1	0.1	0.1	0.1	0.1	0.1	0.1	0.1	0.1	0.1	0.1	0.1	0.1	0.1	0.1	0.1	0.1	0.1	0.1	0.1	0.1	0.1	0.1	0.1	0.1	0.1	0.1	0.1	0.1	0.1	0.1	0.1	0.1	0.1	0.1
	Share_SH_RES_HP2	-	0.7	0.7	0.7	0.7	0.7	0.7	0.7	0.7	0.7	0.7	0.7	0.7	0.7	0.7	0.7	0.7	0.7	0.7	0.7	0.7	0.7	0.7	0.7	0.7	0.7	0.7	0.7	0.7	0.7	0.7	0.7	0.7	0.7	0.7	0.7	0.7	0.7	0.7	0.7	0.7	0.7	0.7	0.7	0.7	0.7	0.7	0.7
	Share_SH_RES_HP3	-	0.1	0.1	0.1	0.1	0.1	0.1	0.1	0.1	0.1	0.1	0.1	0.1	0.1	0.1	0.1	0.1	0.1	0.1	0.1	0.1	0.1	0.1	0.1	0.1	0.1	0.1	0.1	0.1	0.1	0.1	0.1	0.1	0.1	0.1	0.1	0.1	0.1	0.1	0.1	0.1	0.1	0.1	0.1	0.1	0.1	0.1	0.1
	Share_SH_RES_HP4	-	0.1	0.1	0.1	0.1	0.1	0.1	0.1	0.1	0.1	0.1	0.1	0.1	0.1	0.1	0.1	0.1	0.1	0.1	0.1	0.1	0.1	0.1	0.1	0.1	0.1	0.1	0.1	0.1	0.1	0.1	0.1	0.1	0.1	0.1	0.1	0.1	0.1	0.1	0.1	0.1	0.1	0.1	0.1	0.1	0.1	0.1	0.1
	Share_SH_RES_Solar1	-	0.08	0.08	0.08	0.08	0.08	0.08	0.08	0.08	0.08	0.08	0.08	0.08	0.08	0.08	0.08	0.08	0.08	0.08	0.08	0.08	0.08	0.08	0.08	0.08	0.08	0.08	0.08	0.08	0.08	0.08	0.08	0.08	0.08	0.08	0.08	0.08	0.08	0.08	0.08	0.08	0.08	0.08	0.08	0.08	0.08	0.08	0.08
	Share_SH_RES_Solar2	-	0.08	0.08	0.08	0.08	0.08	0.08	0.08	0.08	0.08	0.08	0.08	0.08	0.08	0.08	0.08	0.08	0.08	0.08	0.08	0.08	0.08	0.08	0.08	0.08	0.08	0.08	0.08	0.08	0.08	0.08	0.08	0.08	0.08	0.08	0.08	0.08	0.08	0.08	0.08	0.08	0.08	0.08	0.08	0.08	0.08	0.08	0.08
	Share_SH_RES_Solar3	-	0.84	0.84	0.84	0.84	0.84	0.84	0.84	0.84	0.84	0.84	0.84	0.84	0.84	0.84	0.84	0.84	0.84	0.84	0.84	0.84	0.84	0.84	0.84	0.84	0.84	0.84	0.84	0.84	0.84	0.84	0.84	0.84	0.84	0.84	0.84	0.84	0.84	0.84	0.84	0.84	0.84	0.84	0.84	0.84	0.84	0.84	0.84
	Share_SH_RES_Biomass1	-	0.5	0.5	0.5	0.5	0.5	0.5	0.5	0.5	0.5	0.5	0.5	0.5	0.5	0.5	0.5	0.5	0.5	0.5	0.5	0.5	0.5	0.5	0.5	0.5	0.5	0.5	0.5	0.5	0.5	0.5	0.5	0.5	0.5	0.5	0.5	0.5	0.5	0.5	0.5	0.5	0.5	0.5	0.5	0.5	0.5	0.5	0.5
	Share_SH_RES_Biomass2	-	0.5	0.5	0.5	0.5	0.5	0.5	0.5	0.5	0.5	0.5	0.5	0.5	0.5	0.5	0.5	0.5	0.5	0.5	0.5	0.5	0.5	0.5	0.5	0.5	0.5	0.5	0.5	0.5	0.5	0.5	0.5	0.5	0.5	0.5	0.5	0.5	0.5	0.5	0.5	0.5	0.5	0.5	0.5	0.5	0.5	0.5	0.5
	Share_HP_loc_HP1	-	0.1	0.1	0.1	0.1	0.1	0.1	0.1	0.1	0.1	0.1	0.1	0.1	0.1	0.1	0.1	0.1	0.1	0.1	0.1	0.1	0.1	0.1	0.1	0.1	0.1	0.1	0.1	0.1	0.1	0.1	0.1	0.1	0.1	0.1	0.1	0.1	0.1	0.1	0.1	0.1	0.1	0.1	0.1	0.1	0.1	0.1	0.1
	Share_HP_loc_HP2	-	0.7	0.7	0.7	0.7	0.7	0.7	0.7	0.7	0.7	0.7	0.7	0.7	0.7	0.7	0.7	0.7	0.7	0.7	0.7	0.7	0.7	0.7	0.7	0.7	0.7	0.7	0.7	0.7	0.7	0.7	0.7	0.7	0.7	0.7	0.7	0.7	0.7	0.7	0.7	0.7	0.7	0.7	0.7	0.7	0.7	0.7	0.7
	Share_HP_loc_HP3	-	0.1	0.1	0.1	0.1	0.1	0.1	0.1	0.1	0.1	0.1	0.1	0.1	0.1	0.1	0.1	0.1	0.1	0.1	0.1	0.1	0.1	0.1	0.1	0.1	0.1	0.1	0.1	0.1	0.1	0.1	0.1	0.1	0.1	0.1	0.1	0.1	0.1	0.1	0.1	0.1	0.1	0.1	0.1	0.1	0.1	0.1	0.1
	Share_HP_loc_HP4	-	0.1	0.1	0.1	0.1	0.1	0.1	0.1	0.1	0.1	0.1	0.1	0.1	0.1	0.1	0.1	0.1	0.1	0.1	0.1	0.1	0.1	0.1	0.1	0.1	0.1	0.1	0.1	0.1	0.1	0.1	0.1	0.1	0.1	0.1	0.1	0.1	0.1	0.1	0.1	0.1	0.1	0.1	0.1	0.1	0.1	0.1	0.1
	Share_HP_loc_Solar1	-	0.08	0.08	0.08	0.08	0.08	0.08	0.08	0.08	0.08	0.08	0.08	0.08	0.08	0.08	0.08	0.08	0.08	0.08	0.08	0.08	0.08	0.08	0.08	0.08	0.08	0.08	0.08	0.08	0.08	0.08	0.08	0.08	0.08	0.08	0.08	0.08	0.08	0.08	0.08	0.08	0.08	0.08	0.08	0.08	0.08	0.08	0.08
	Share_HP_loc_Solar2	-	0.08	0.08	0.08	0.08	0.08	0.08	0.08	0.08	0.08	0.08	0.08	0.08	0.08	0.08	0.08	0.08	0.08	0.08	0.08	0.08	0.08	0.08	0.08	0.08	0.08	0.08	0.08	0.08	0.08	0.08	0.08	0.08	0.08	0.08	0.08	0.08	0.08	0.08	0.08	0.08	0.08	0.08	0.08	0.08	0.08	0.08	0.08
	Share_HP_loc_Solar3	-	0.84	0.84	0.84	0.84	0.84	0.84	0.84	0.84	0.84	0.84	0.84	0.84	0.84	0.84	0.84	0.84	0.84	0.84	0.84	0.84	0.84	0.84	0.84	0.84	0.84	0.84	0.84	0.84	0.84	0.84	0.84	0.84	0.84	0.84	0.84	0.84	0.84	0.84	0.84	0.84	0.84	0.84	0.84	0.84	0.84	0.84	0.84
	Share_CONV_PtL1	-	0.5	0.5	0.5	0.5	0.5	0.5	0.5	0.5	0.5	0.5	0.5	0.5	0.5	0.5	0.5	0.5	0.5	0.5	0.5	0.5	0.5	0.5	0.5	0.5	0.5	0.5	0.5	0.5	0.5	0.5	0.5	0.5	0.5	0.5	0.5	0.5	0.5	0.5	0.5	0.5	0.5	0.5	0.5	0.5	0.5	0.5	0.5
	Share_CONV_PtL2	-	0.5	0.5	0.5	0.5	0.5	0.5	0.5	0.5	0.5	0.5	0.5	0.5	0.5	0.5	0.5	0.5	0.5	0.5	0.5	0.5	0.5	0.5	0.5	0.5	0.5	0.5	0.5	0.5	0.5	0.5	0.5	0.5	0.5	0.5	0.5	0.5	0.5	0.5	0.5	0.5	0.5	0.5	0.5	0.5	0.5	0.5	0.5
	Share_CONV_BtL1	-	0.5	0.5	0.5	0.5	0.5	0.5	0.5	0.5	0.5	0.5	0.5	0.5	0.5	0.5	0.5	0.5	0.5	0.5	0.5	0.5	0.5	0.5	0.5	0.5	0.5	0.5	0.5	0.5	0.5	0.5	0.5	0.5	0.5	0.5	0.5	0.5	0.5	0.5	0.5	0.5	0.5	0.5	0.5	0.5	0.5	0.5	0.5
	Share_CONV_BtL2	-	0.5	0.5	0.5	0.5	0.5	0.5	0.5	0.5	0.5	0.5	0.5	0.5	0.5	0.5	0.5	0.5	0.5	0.5	0.5	0.5	0.5	0.5	0.5	0.5	0.5	0.5	0.5	0.5	0.5	0.5	0.5	0.5	0.5	0.5	0.5	0.5	0.5	0.5	0.5	0.5	0.5	0.5	0.5	0.5	0.5	0.5	0.5
	Share_CONV_Biogas2Grid1	-	0.333333	0.333333	0.333333	0.333333	0.333333	0.333333	0.333333	0.333333	0.333333	0.333333	0.333333	0.333333	0.333333	0.333333	0.333333	0.333333	0.333333	0.333333	0.333333	0.333333	0.333333	0.333333	0.333333	0.333333	0.333333	0.333333	0.333333	0.333333	0.333333	0.333333	0.333333	0.333333	0.333333	0.333333	0.333333	0.333333	0.333333	0.333333	0.333333	0.333333	0.333333	0.333333	0.333333	0.333333	0.333333	0.333333	0.333333
	Share_CONV_Biogas2Grid2	-	0.333333	0.333333	0.333333	0.333333	0.333333	0.333333	0.333333	0.333333	0.333333	0.333333	0.333333	0.333333	0.333333	0.333333	0.333333	0.333333	0.333333	0.333333	0.333333	0.333333	0.333333	0.333333	0.333333	0.333333	0.333333	0.333333	0.333333	0.333333	0.333333	0.333333	0.333333	0.333333	0.333333	0.333333	0.333333	0.333333	0.333333	0.333333	0.333333	0.333333	0.333333	0.333333	0.333333	0.333333	0.333333	0.333333	0.333333
	Share_CONV_Biogas2Grid3	-	0.333333	0.333333	0.333333	0.333333	0.333333	0.333333	0.333333	0.333333	0.333333	0.333333	0.333333	0.333333	0.333333	0.333333	0.333333	0.333333	0.333333	0.333333	0.333333	0.333333	0.333333	0.333333	0.333333	0.333333	0.333333	0.333333	0.333333	0.333333	0.333333	0.333333	0.333333	0.333333	0.333333	0.333333	0.333333	0.333333	0.333333	0.333333	0.333333	0.333333	0.333333	0.333333	0.333333	0.333333	0.333333	0.333333	0.333333
	Share_CONV_Biogas1	-	0.333333	0.333333	0.333333	0.333333	0.333333	0.333333	0.333333	0.333333	0.333333	0.333333	0.333333	0.333333	0.333333	0.333333	0.333333	0.333333	0.333333	0.333333	0.333333	0.333333	0.333333	0.333333	0.333333	0.333333	0.333333	0.333333	0.333333	0.333333	0.333333	0.333333	0.333333	0.333333	0.333333	0.333333	0.333333	0.333333	0.333333	0.333333	0.333333	0.333333	0.333333	0.333333	0.333333	0.333333	0.333333	0.333333	0.333333
	Share_CONV_Biogas2	-	0.333333	0.333333	0.333333	0.333333	0.333333	0.333333	0.333333	0.333333	0.333333	0.333333	0.333333	0.333333	0.333333	0.333333	0.333333	0.333333	0.333333	0.333333	0.333333	0.333333	0.333333	0.333333	0.333333	0.333333	0.333333	0.333333	0.333333	0.333333	0.333333	0.333333	0.333333	0.333333	0.333333	0.333333	0.333333	0.333333	0.333333	0.333333	0.333333	0.333333	0.333333	0.333333	0.333333	0.333333	0.333333	0.333333	0.333333
	Share_CONV_Biogas3	-	0.333333	0.333333	0.333333	0.333333	0.333333	0.333333	0.333333	0.333333	0.333333	0.333333	0.333333	0.333333	0.333333	0.333333	0.333333	0.333333	0.333333	0.333333	0.333333	0.333333	0.333333	0.333333	0.333333	0.333333	0.333333	0.333333	0.333333	0.333333	0.333333	0.333333	0.333333	0.333333	0.333333	0.333333	0.333333	0.333333	0.333333	0.333333	0.333333	0.333333	0.333333	0.333333	0.333333	0.333333	0.333333	0.333333	0.333333
	Share_CHP_loc_Biogas1	-	0.333333	0.333333	0.333333	0.333333	0.333333	0.333333	0.333333	0.333333	0.333333	0.333333	0.333333	0.333333	0.333333	0.333333	0.333333	0.333333	0.333333	0.333333	0.333333	0.333333	0.333333	0.333333	0.333333	0.333333	0.333333	0.333333	0.333333	0.333333	0.333333	0.333333	0.333333	0.333333	0.333333	0.333333	0.333333	0.333333	0.333333	0.333333	0.333333	0.333333	0.333333	0.333333	0.333333	0.333333	0.333333	0.333333	0.333333
	Share_CHP_loc_Biogas2	-	0.333333	0.333333	0.333333	0.333333	0.333333	0.333333	0.333333	0.333333	0.333333	0.333333	0.333333	0.333333	0.333333	0.333333	0.333333	0.333333	0.333333	0.333333	0.333333	0.333333	0.333333	0.333333	0.333333	0.333333	0.333333	0.333333	0.333333	0.333333	0.333333	0.333333	0.333333	0.333333	0.333333	0.333333	0.333333	0.333333	0.333333	0.333333	0.333333	0.333333	0.333333	0.333333	0.333333	0.333333	0.333333	0.333333	0.333333
	Share_CHP_loc_Biogas3	-	0.333333	0.333333	0.333333	0.333333	0.333333	0.333333	0.333333	0.333333	0.333333	0.333333	0.333333	0.333333	0.333333	0.333333	0.333333	0.333333	0.333333	0.333333	0.333333	0.333333	0.333333	0.333333	0.333333	0.333333	0.333333	0.333333	0.333333	0.333333	0.333333	0.333333	0.333333	0.333333	0.333333	0.333333	0.333333	0.333333	0.333333	0.333333	0.333333	0.333333	0.333333	0.333333	0.333333	0.333333	0.333333	0.333333	0.333333
	Share_CHP_IND_Biogas1	-	0.333333	0.333333	0.333333	0.333333	0.333333	0.333333	0.333333	0.333333	0.333333	0.333333	0.333333	0.333333	0.333333	0.333333	0.333333	0.333333	0.333333	0.333333	0.333333	0.333333	0.333333	0.333333	0.333333	0.333333	0.333333	0.333333	0.333333	0.333333	0.333333	0.333333	0.333333	0.333333	0.333333	0.333333	0.333333	0.333333	0.333333	0.333333	0.333333	0.333333	0.333333	0.333333	0.333333	0.333333	0.333333	0.333333	0.333333
	Share_CHP_IND_Biogas2	-	0.333333	0.333333	0.333333	0.333333	0.333333	0.333333	0.333333	0.333333	0.333333	0.333333	0.333333	0.333333	0.333333	0.333333	0.333333	0.333333	0.333333	0.333333	0.333333	0.333333	0.333333	0.333333	0.333333	0.333333	0.333333	0.333333	0.333333	0.333333	0.333333	0.333333	0.333333	0.333333	0.333333	0.333333	0.333333	0.333333	0.333333	0.333333	0.333333	0.333333	0.333333	0.333333	0.333333	0.333333	0.333333	0.333333	0.333333
	Share_CHP_IND_Biogas3	-	0.333333	0.333333	0.333333	0.333333	0.333333	0.333333	0.333333	0.333333	0.333333	0.333333	0.333333	0.333333	0.333333	0.333333	0.333333	0.333333	0.333333	0.333333	0.333333	0.333333	0.333333	0.333333	0.333333	0.333333	0.333333	0.333333	0.333333	0.333333	0.333333	0.333333	0.333333	0.333333	0.333333	0.333333	0.333333	0.333333	0.333333	0.333333	0.333333	0.333333	0.333333	0.333333	0.333333	0.333333	0.333333	0.333333	0.333333
	Share_CHP_SV_Biogas1	-	0.333333	0.333333	0.333333	0.333333	0.333333	0.333333	0.333333	0.333333	0.333333	0.333333	0.333333	0.333333	0.333333	0.333333	0.333333	0.333333	0.333333	0.333333	0.333333	0.333333	0.333333	0.333333	0.333333	0.333333	0.333333	0.333333	0.333333	0.333333	0.333333	0.333333	0.333333	0.333333	0.333333	0.333333	0.333333	0.333333	0.333333	0.333333	0.333333	0.333333	0.333333	0.333333	0.333333	0.333333	0.333333	0.333333	0.333333
	Share_CHP_SV_Biogas2	-	0.333333	0.333333	0.333333	0.333333	0.333333	0.333333	0.333333	0.333333	0.333333	0.333333	0.333333	0.333333	0.333333	0.333333	0.333333	0.333333	0.333333	0.333333	0.333333	0.333333	0.333333	0.333333	0.333333	0.333333	0.333333	0.333333	0.333333	0.333333	0.333333	0.333333	0.333333	0.333333	0.333333	0.333333	0.333333	0.333333	0.333333	0.333333	0.333333	0.333333	0.333333	0.333333	0.333333	0.333333	0.333333	0.333333	0.333333
	Share_CHP_SV_Biogas3	-	0.333333	0.333333	0.333333	0.333333	0.333333	0.333333	0.333333	0.333333	0.333333	0.333333	0.333333	0.333333	0.333333	0.333333	0.333333	0.333333	0.333333	0.333333	0.333333	0.333333	0.333333	0.333333	0.333333	0.333333	0.333333	0.333333	0.333333	0.333333	0.333333	0.333333	0.333333	0.333333	0.333333	0.333333	0.333333	0.333333	0.333333	0.333333	0.333333	0.333333	0.333333	0.333333	0.333333	0.333333	0.333333	0.333333	0.333333
	Share_CONV_Biodiesel1	-	0	0	0	0	0	0	0	0	0	0	0	0	0	0	0	0	0	0	0	0	0	0	0	0	0	0	0	0	0	0	0	0	0	0	0	0	0	0	0	0	0	0	0	0	0	0	0
	Share_CONV_Biodiesel2	-	0.1	0.1	0.1	0.1	0.1	0.1	0.1	0.1	0.1	0.1	0.1	0.1	0.1	0.1	0.1	0.1	0.1	0.1	0.1	0.1	0.1	0.1	0.1	0.1	0.1	0.1	0.1	0.1	0.1	0.1	0.1	0.1	0.1	0.1	0.1	0.1	0.1	0.1	0.1	0.1	0.1	0.1	0.1	0.1	0.1	0.1	0.1
	Share_CONV_Biodiesel3	-	0.11	0.11	0.11	0.11	0.11	0.11	0.11	0.11	0.11	0.11	0.11	0.11	0.11	0.11	0.11	0.11	0.11	0.11	0.11	0.11	0.11	0.11	0.11	0.11	0.11	0.11	0.11	0.11	0.11	0.11	0.11	0.11	0.11	0.11	0.11	0.11	0.11	0.11	0.11	0.11	0.11	0.11	0.11	0.11	0.11	0.11	0.11
	Share_CONV_Biodiesel4	-	0.79	0.79	0.79	0.79	0.79	0.79	0.79	0.79	0.79	0.79	0.79	0.79	0.79	0.79	0.79	0.79	0.79	0.79	0.79	0.79	0.79	0.79	0.79	0.79	0.79	0.79	0.79	0.79	0.79	0.79	0.79	0.79	0.79	0.79	0.79	0.79	0.79	0.79	0.79	0.79	0.79	0.79	0.79	0.79	0.79	0.79	0.79
	Share_CONV_Pellets1	-	0.25	0.25	0.25	0.25	0.25	0.25	0.25	0.25	0.25	0.25	0.25	0.25	0.25	0.25	0.25	0.25	0.25	0.25	0.25	0.25	0.25	0.25	0.25	0.25	0.25	0.25	0.25	0.25	0.25	0.25	0.25	0.25	0.25	0.25	0.25	0.25	0.25	0.25	0.25	0.25	0.25	0.25	0.25	0.25	0.25	0.25	0.25
	Share_CONV_Pellets2	-	0.25	0.25	0.25	0.25	0.25	0.25	0.25	0.25	0.25	0.25	0.25	0.25	0.25	0.25	0.25	0.25	0.25	0.25	0.25	0.25	0.25	0.25	0.25	0.25	0.25	0.25	0.25	0.25	0.25	0.25	0.25	0.25	0.25	0.25	0.25	0.25	0.25	0.25	0.25	0.25	0.25	0.25	0.25	0.25	0.25	0.25	0.25
	Share_CONV_Pellets3	-	0.25	0.25	0.25	0.25	0.25	0.25	0.25	0.25	0.25	0.25	0.25	0.25	0.25	0.25	0.25	0.25	0.25	0.25	0.25	0.25	0.25	0.25	0.25	0.25	0.25	0.25	0.25	0.25	0.25	0.25	0.25	0.25	0.25	0.25	0.25	0.25	0.25	0.25	0.25	0.25	0.25	0.25	0.25	0.25	0.25	0.25	0.25
	Share_CONV_Pellets4	-	0.25	0.25	0.25	0.25	0.25	0.25	0.25	0.25	0.25	0.25	0.25	0.25	0.25	0.25	0.25	0.25	0.25	0.25	0.25	0.25	0.25	0.25	0.25	0.25	0.25	0.25	0.25	0.25	0.25	0.25	0.25	0.25	0.25	0.25	0.25	0.25	0.25	0.25	0.25	0.25	0.25	0.25	0.25	0.25	0.25	0.25	0.25
	Share_CONV_Bioethanol1	-	0	0	0	0	0	0	0	0	0	0	0	0	0	0	0	0	0	0	0	0	0	0	0	0	0	0	0	0	0	0	0	0	0	0	0	0	0	0	0	0	0	0	0	0	0	0	0
	Share_CONV_Bioethanol2	-	1	1	1	1	1	1	1	1	1	1	1	1	1	1	1	1	1	1	1	1	1	1	1	1	1	1	1	1	1	1	1	1	1	1	1	1	1	1	1	1	1	1	1	1	1	1	1
	Share_CONV_PtL_IMP1	-	0.5	0.5	0.5	0.5	0.5	0.5	0.5	0.5	0.5	0.5	0.5	0.5	0.5	0.5	0.5	0.5	0.5	0.5	0.5	0.5	0.5	0.5	0.5	0.5	0.5	0.5	0.5	0.5	0.5	0.5	0.5	0.5	0.5	0.5	0.5	0.5	0.5	0.5	0.5	0.5	0.5	0.5	0.5	0.5	0.5	0.5	0.5
	Share_CONV_PtL_IMP2	-	0.5	0.5	0.5	0.5	0.5	0.5	0.5	0.5	0.5	0.5	0.5	0.5	0.5	0.5	0.5	0.5	0.5	0.5	0.5	0.5	0.5	0.5	0.5	0.5	0.5	0.5	0.5	0.5	0.5	0.5	0.5	0.5	0.5	0.5	0.5	0.5	0.5	0.5	0.5	0.5	0.5	0.5	0.5	0.5	0.5	0.5	0.5
	Share_PP_Imp_CSP1	-	0.5	0.5	0.5	0.5	0.5	0.5	0.5	0.5	0.5	0.5	0.5	0.5	0.5	0.5	0.5	0.5	0.5	0.5	0.5	0.5	0.5	0.5	0.5	0.5	0.5	0.5	0.5	0.5	0.5	0.5	0.5	0.5	0.5	0.5	0.5	0.5	0.5	0.5	0.5	0.5	0.5	0.5	0.5	0.5	0.5	0.5	0.5
	Share_PP_Imp_CSP2	-	0.5	0.5	0.5	0.5	0.5	0.5	0.5	0.5	0.5	0.5	0.5	0.5	0.5	0.5	0.5	0.5	0.5	0.5	0.5	0.5	0.5	0.5	0.5	0.5	0.5	0.5	0.5	0.5	0.5	0.5	0.5	0.5	0.5	0.5	0.5	0.5	0.5	0.5	0.5	0.5	0.5	0.5	0.5	0.5	0.5	0.5	0.5
	Share_PP_ImpSF_CSP1	-	0.5	0.5	0.5	0.5	0.5	0.5	0.5	0.5	0.5	0.5	0.5	0.5	0.5	0.5	0.5	0.5	0.5	0.5	0.5	0.5	0.5	0.5	0.5	0.5	0.5	0.5	0.5	0.5	0.5	0.5	0.5	0.5	0.5	0.5	0.5	0.5	0.5	0.5	0.5	0.5	0.5	0.5	0.5	0.5	0.5	0.5	0.5
	Share_PP_ImpSF_CSP2	-	0.5	0.5	0.5	0.5	0.5	0.5	0.5	0.5	0.5	0.5	0.5	0.5	0.5	0.5	0.5	0.5	0.5	0.5	0.5	0.5	0.5	0.5	0.5	0.5	0.5	0.5	0.5	0.5	0.5	0.5	0.5	0.5	0.5	0.5	0.5	0.5	0.5	0.5	0.5	0.5	0.5	0.5	0.5	0.5	0.5	0.5	0.5
	Share_HIGHSPEED_in_TrP_Electric	-	0.25	0.25	0.25	0.25	0.25	0.25	0.25	0.25	0.25	0.25	0.25	0.25	0.25	0.25	0.25	0.25	0.25	0.25	0.25	0.25	0.25	0.25	0.25	0.25	0.25	0.25	0.25	0.25	0.25	0.25	0.25	0.25	0.25	0.25	0.25	0.25	0.25	0.25	0.25	0.25	0.25	0.25	0.25	0.25	0.25	0.25	0.25
	Share_REGIONAL_in_TrP_Electric	-	0.25	0.25	0.25	0.25	0.25	0.25	0.25	0.25	0.25	0.25	0.25	0.25	0.25	0.25	0.25	0.25	0.25	0.25	0.25	0.25	0.25	0.25	0.25	0.25	0.25	0.25	0.25	0.25	0.25	0.25	0.25	0.25	0.25	0.25	0.25	0.25	0.25	0.25	0.25	0.25	0.25	0.25	0.25	0.25	0.25	0.25	0.25
	Share_TRAM_in_TrP_Electric	-	0.25	0.25	0.25	0.25	0.25	0.25	0.25	0.25	0.25	0.25	0.25	0.25	0.25	0.25	0.25	0.25	0.25	0.25	0.25	0.25	0.25	0.25	0.25	0.25	0.25	0.25	0.25	0.25	0.25	0.25	0.25	0.25	0.25	0.25	0.25	0.25	0.25	0.25	0.25	0.25	0.25	0.25	0.25	0.25	0.25	0.25	0.25
	Share_URBAN_in_TrP_Electric	-	0.25	0.25	0.25	0.25	0.25	0.25	0.25	0.25	0.25	0.25	0.25	0.25	0.25	0.25	0.25	0.25	0.25	0.25	0.25	0.25	0.25	0.25	0.25	0.25	0.25	0.25	0.25	0.25	0.25	0.25	0.25	0.25	0.25	0.25	0.25	0.25	0.25	0.25	0.25	0.25	0.25	0.25	0.25	0.25	0.25	0.25	0.25
	Share_PP_PV_buildings1	-	0.33	0.33	0.33	0.33	0.33	0.33	0.33	0.33	0.33	0.33	0.33	0.33	0.33	0.33	0.33	0.33	0.33	0.33	0.33	0.33	0.33	0.33	0.33	0.33	0.33	0.33	0.33	0.33	0.33	0.33	0.33	0.33	0.33	0.33	0.33	0.33	0.33	0.33	0.33	0.33	0.33	0.33	0.33	0.33	0.33	0.33	0.33
	Share_PP_PV_buildings2	-	0.624	0.624	0.624	0.624	0.624	0.624	0.624	0.624	0.624	0.624	0.624	0.624	0.624	0.624	0.624	0.624	0.624	0.624	0.624	0.624	0.624	0.624	0.624	0.624	0.624	0.624	0.624	0.624	0.624	0.624	0.624	0.624	0.624	0.624	0.624	0.624	0.624	0.624	0.624	0.624	0.624	0.624	0.624	0.624	0.624	0.624	0.624
	Share_PP_PV_buildings3	-	0.046	0.046	0.046	0.046	0.046	0.046	0.046	0.046	0.046	0.046	0.046	0.046	0.046	0.046	0.046	0.046	0.046	0.046	0.046	0.046	0.046	0.046	0.046	0.046	0.046	0.046	0.046	0.046	0.046	0.046	0.046	0.046	0.046	0.046	0.046	0.046	0.046	0.046	0.046	0.046	0.046	0.046	0.046	0.046	0.046	0.046	0.046
	Share_PP_PV_power_station1	-	0.33	0.33	0.33	0.33	0.33	0.33	0.33	0.33	0.33	0.33	0.33	0.33	0.33	0.33	0.33	0.33	0.33	0.33	0.33	0.33	0.33	0.33	0.33	0.33	0.33	0.33	0.33	0.33	0.33	0.33	0.33	0.33	0.33	0.33	0.33	0.33	0.33	0.33	0.33	0.33	0.33	0.33	0.33	0.33	0.33	0.33	0.33
	Share_PP_PV_power_station2	-	0.624	0.624	0.624	0.624	0.624	0.624	0.624	0.624	0.624	0.624	0.624	0.624	0.624	0.624	0.624	0.624	0.624	0.624	0.624	0.624	0.624	0.624	0.624	0.624	0.624	0.624	0.624	0.624	0.624	0.624	0.624	0.624	0.624	0.624	0.624	0.624	0.624	0.624	0.624	0.624	0.624	0.624	0.624	0.624	0.624	0.624	0.624
	Share_PP_PV_power_station3	-	0.046	0.046	0.046	0.046	0.046	0.046	0.046	0.046	0.046	0.046	0.046	0.046	0.046	0.046	0.046	0.046	0.046	0.046	0.046	0.046	0.046	0.046	0.046	0.046	0.046	0.046	0.046	0.046	0.046	0.046	0.046	0.046	0.046	0.046	0.046	0.046	0.046	0.046	0.046	0.046	0.046	0.046	0.046	0.046	0.046	0.046	0.046
Sources
BSW-Solar, 2018. Statistische Zahlen der deutschenSolarwärmebranche (Solarthermie). Bundesverband Solarwirtschaft e.V. (BSW-Solar), https://www.solarwirtschaft.de/fileadmin/user_upload/bsw_faktenblatt_st_2018_2.pdf.
Fraunhofer ISE, 2019. PHOTOVOLTAICS REPORT. https://www.ise.fraunhofer.de/content/dam/ise/de/documents/publications/studies/Photovoltaics-Report.pdf.
[truncated: 5 more columns]

## Sheet: S3_Assignment to ESM techs
Type	Scenario Technology	unit	LCA Product System 1	LCA Product System 2	LCA Product System 3	LCA Product System 4	Share Product System 1	Share Product System 2	Share Product System 3	Share Product System 4
Cap New	CapNew_CHP_loc_GasFuelCell	MW	solid oxide fuel cell 125kWe, future | cut-off, U - NCP
Cap New	CapNew_CHP_loc_H2FuelCell	MW	solid oxide fuel cell 125kWe, future | cut-off, U - NCP
Cap New	CapNew_CHP_loc_Biomass	MW	heat and power co-generation, wood chips, 2000 kW, state-of-the-art 2014 | cut-off, U - NCP
Cap New	CapNew_CHP_loc_Gas	MW	heat and power co-generation, 1MW electrical, lean burn | cut-off, U - NCP
Cap New	CapNew_CHP_loc_Oil	MW
Cap New	CapNew_CHP_loc_Biogas	MW	heat and power co-generation unit construction, 1MW electrical | cut-off, U - NCP
Cap New	CapNew_CHP_loc_Bioliquids	MW
Cap New	CapNew_CHP_loc_Geothermal	MW
Cap New	CapNew_CHP_loc_LandfillGas	MW	heat and power co-generation unit construction, 1MW electrical | cut-off, U - NCP
Cap New	CapNew_CHP_reg_Biomass	MW	heat and power co-generation, wood chips, 6667 kW | cut-off, U - NCP
Cap New	CapNew_CHP_reg_Gas_CCS	MW
Cap New	CapNew_CHP_reg_Gas_noCCS	MW	market for gas power plant, combined cycle, 400MW electrical | gas power plant, combined cycle, 400MW electrical | cut-off, U - ORG
Cap New	CapNew_CHP_reg_HardCoal_CCS	MW
Cap New	CapNew_CHP_reg_HardCoal_noCCS	MW	market for hard coal power plant | hard coal power plant | cut-off, U - ORG
Cap New	CapNew_CHP_reg_Lignite_CCS	MW
Cap New	CapNew_CHP_reg_Lignite_noCCS	MW	market for lignite power plant | lignite power plant | cut-off, U - ORG
Cap New	CapNew_CHP_reg_Oil	MW
Cap New	CapNew_CHP_reg_Waste	MW
Cap New	CapNew_PP_Biogas	MW
Cap New	CapNew_PP_Bioliquids	MW
Cap New	CapNew_PP_Biomass	MW	hard coal power plant construction, 100MW | hard coal power plant | cut-off, U - ORG
Cap New	CapNew_PP_GasCC_CCS	MW
Cap New	CapNew_PP_GasCC_noCCS	MW	market for gas power plant, combined cycle, 400MW electrical | gas power plant, combined cycle, 400MW electrical | cut-off, U - ORG
Cap New	CapNew_PP_GasGT	MW	market for gas turbine, 10MW electrical | gas turbine, 10MW electrical | cut-off, U - ORG
Cap New	CapNew_PP_Geothermal	MW	market for geothermal power plant, 5.5MWel | geothermal power plant, 5.5MWel | cut-off, U - ORG
Cap New	CapNew_PP_HardCoal_CCS	MW
Cap New	CapNew_PP_HardCoal_noCCS	MW	market for hard coal power plant | hard coal power plant | cut-off, U - ORG
Cap New	CapNew_PP_Hydro_medium	MW	market for hydropower plant, run-of-river | hydropower plant, run-of-river | cut-off, U - ORG
Cap New	CapNew_PP_Hydro_large	MW	market for hydropower plant, reservoir, non-alpine regions | hydropower plant, reservoir, non-alpine regions | cut-off, U - ORG
Cap New	CapNew_PP_Hydro_small	MW	market for hydropower plant, run-of-river | hydropower plant, run-of-river | cut-off, U - ORG
Cap New	CapNew_PP_LandfillGas	MW
Cap New	CapNew_PP_Lignite_CCS	MW
Cap New	CapNew_PP_Lignite_noCCS	MW	market for lignite power plant | lignite power plant | cut-off, U - ORG
Cap New	CapNew_PP_Nuclear	MW	market for nuclear power plant, pressure water reactor 1000MW | nuclear power plant, pressure water reactor 1000MW | cut-off, U - ORG
Cap New	CapNew_PP_Ocean	MW
Cap New	CapNew_PP_Oil	MW	market for oil power plant, 500MW | oil power plant, 500MW | cut-off, U - ORG
Cap New	CapNew_PP_PV_buildings	MW	Market for single-Si rooftop power plants - ORG	Market for multi-Si rooftop power plants - ORG	Market for thin-film rooftop power plants - ORG		Share_PP_PV_buildings1	Share_PP_PV_buildings2	Share_PP_PV_buildings3
Cap New	CapNew_PP_PV_power_station	MW	1.3 MWp open ground installation, single-Si, panel, on open ground/p/DE/I - ORG	1.3 MWp open ground installation, multi-Si, panel, on open ground/p/DE/I - ORG	1.3 MWp open ground installation, CdTe, panel, on open ground/p/DE/I - ORG		Share_PP_PV_power_station1	Share_PP_PV_power_station2	Share_PP_PV_power_station3
Cap New	CapNew_PP_Waste	MW
Cap New	CapNew_PP_Wind_offshore	MW	wind turbine construction, 2 MW, offshore | wind turbine, 2 MW , offshore | cut-off, U - NCP
Cap New	CapNew_PP_Wind_onshore	MW	wind turbine construction, 4.5MW, onshore | wind turbine, 4.5MW, onshore | cut-off, U - ORG
Cap New	CapNew_CHP_RES_Biomass	MW	wood pellets, burned in stirling heat and power co-generation unit, 3kW electrical, future | cut-off, U - NCP
Cap New	CapNew_CHP_RES_GasFuelCell	MW	polymer electrolyte membrane fuel cell 2kWe, future | cut-off, U - NCP
Cap New	CapNew_CHP_RES_Gas	MW	heat and power co-generation, natural gas, 50kW electrical, lean burn | cut-off, U - NCP
Cap New	CapNew_CHP_IND_Biogas	MW	heat and power co-generation unit construction, 1MW electrical | cut-off, U - NCP
Cap New	CapNew_CHP_IND_Biofuel	MW
Cap New	CapNew_CHP_IND_Biomass	MW	heat and power co-generation, wood chips, 2000 kW, state-of-the-art 2014 | cut-off, U - NCP
Cap New	CapNew_CHP_IND_Gas_BHKW	MW	heat and power co-generation, natural gas, 50kW electrical, lean burn | cut-off, U - NCP
Cap New	CapNew_CHP_IND_Gas	MW	market for gas power plant, combined cycle, 400MW electrical | gas power plant, combined cycle, 400MW electrical | cut-off, U - ORG
Cap New	CapNew_CHP_IND_HardCoal	MW	market for hard coal power plant | hard coal power plant | cut-off, U - ORG
Cap New	CapNew_CHP_IND_LandfillGas	MW	heat and power co-generation unit construction, 1MW electrical | cut-off, U - NCP
Cap New	CapNew_CHP_IND_Lignite	MW	market for lignite power plant | lignite power plant | cut-off, U - ORG
Cap New	CapNew_CHP_IND_Oil	MW
Cap New	CapNew_CHP_IND_GasFuelCell	MW	solid oxide fuel cell 125kWe, future | cut-off, U - NCP
Cap New	CapNew_CHP_IND_H2FuelCell	MW	solid oxide fuel cell 125kWe, future | cut-off, U - NCP
Cap New	CapNew_CHP_SV_Biofuel	MW
Cap New	CapNew_CHP_SV_Biomass	MW	wood pellets, burned in stirling heat and power co-generation unit, 3kW electrical, future | cut-off, U - NCP
Cap New	CapNew_CHP_SV_Gas	MW	heat and power co-generation, 1MW electrical, lean burn | cut-off, U - NCP
Cap New	CapNew_CHP_SV_GasFuelCell	MW	solid oxide fuel cell 125kWe, future | cut-off, U - NCP
Cap New	CapNew_CHP_SV_H2FuelCell	MW	solid oxide fuel cell 125kWe, future | cut-off, U - NCP
Cap New	CapNew_CHP_SV_Biogas	MW	heat and power co-generation unit construction, 1MW electrical | cut-off, U - NCP
Cap New	CapNew_CHP_SV_GasMicro	MW	heat and power co-generation, natural gas, 50kW electrical, lean burn | cut-off, U - NCP
Cap New	CapNew_CHP_SV_Oil	MW
Cap New	CapNew_PStor_PHS	MW	market for hydropower plant, reservoir, non-alpine regions | hydropower plant, reservoir, non-alpine regions | cut-off, U - ORG
Cap New	CapNew_PStor_Li	MW
Cap New	CapNew_PStor_VRFB	MW	VRFB Battery module 1MW/8MWh, converter - ORG
Cap New	CapNew_PStor_CAES	MW
Cap New	CapNew_PStorRes_PHS	kWh
Cap New	CapNew_PStorRes_Li	kWh	Battery module, 26kWh, LFP-LTO, rack mounted, for stationary batt storage (JB)
Cap New	CapNew_PStorRes_VRFB	kWh	VRFB Battery module 1MW/8MWh, storage - ORG
Cap New	CapNew_PStorRes_CAES	kWh
Cap New	CapNew_SHHW_IND_Biomass	MW	Bau Kessel 10 kW - ORG
Cap New	CapNew_SHHW_IND_DistrictHeat	MW	no LCI, however, impacts are assumed to be negligible
Cap New	CapNew_SHHW_IND_Electric	MW	auxiliary heating unit production, electric, 5kW | auxiliary heating unit, electric, 5kW | cut-off, U - ORG
Cap New	CapNew_SHHW_IND_Gas	MW	market for gas boiler | gas boiler | cut-off, U - ORG
Cap New	CapNew_SHHW_IND_Geothermal	MW
Cap New	CapNew_SHHW_IND_HardCoal	MW
Cap New	CapNew_SHHW_IND_Lignite	MW
Cap New	CapNew_SHHW_IND_Oil	MW	heat production, light fuel oil, at boiler 10kW condensing, non-modulating | cut-off, U - NCP
Cap New	CapNew_SHHW_IND_Solar	MW	market for solar collector system, Cu flat plate collector, one-family house, combined system | solar collector system, Cu flat plate collector, one-family house, combined system | cut-off, U - ORG	Gesamtanlage Flachkollektor, verpackt - ORG	Gesamtanlage Vakuumröhrenkollektor, verpackt - ORG		Share_SHHW_IND_Solar1	Share_SHHW_IND_Solar2	Share_SHHW_IND_Solar3
Cap New	CapNew_SHHW_IND_HeatPump	MW	market for heat pump, 30kW | heat pump, 30kW | cut-off, U - ORG	heat pump production, air, 10 kW - ORG	heat pump production, ground-source horizontal, 10 kW - ORG	heat pump production, ground-source vertical, 10 kW - ORG	Share_SHHW_IND_HP1	Share_SHHW_IND_HP2	Share_SHHW_IND_HP3	Share_SHHW_IND_HP4
Cap New	CapNew_PH_IND_Biomass	MW	Bau Hackschnitzel-Kessel 800 kW - ORG
Cap New	CapNew_PH_IND_Electric	MW	auxiliary heating unit production, electric, 5kW | auxiliary heating unit, electric, 5kW | cut-off, U - ORG
Cap New	CapNew_PH_IND_Gas	MW	market for industrial furnace, natural gas | industrial furnace, natural gas | cut-off, U - ORG
Cap New	CapNew_PH_IND_Geothermal	MW
Cap New	CapNew_PH_IND_HardCoal	MW	market for industrial furnace, coal, 1-10MW | industrial furnace, coal, 1-10MW | cut-off, U - ORG
Cap New	CapNew_PH_IND_Lignite	MW	market for industrial furnace, coal, 1-10MW | industrial furnace, coal, 1-10MW | cut-off, U - ORG
Cap New	CapNew_PH_IND_Oil	MW	heat production, light fuel oil, at industrial furnance 1MW | cut-off, U - NCP
Cap New	CapNew_PH_IND_Solar	MW	market for solar collector system, Cu flat plate collector, one-family house, combined system | solar collector system, Cu flat plate collector, one-family house, combined system | cut-off, U - ORG	Gesamtanlage Flachkollektor, verpackt - ORG	Gesamtanlage Vakuumröhrenkollektor, verpackt - ORG		Share_PH_IND_Solar1	Share_PH_IND_Solar2	Share_PH_IND_Solar3
Cap New	CapNew_PH_IND_DistrictHeat	MW	no LCI, however, impacts are assumed to be negligible
Cap New	CapNew_PH_IND_OilProducts	MW	heat production, light fuel oil, at industrial furnance 1MW | cut-off, U - NCP
Cap New	CapNew_PH_IND_CoalProducts	MW	market for industrial furnace, coal, 1-10MW | industrial furnace, coal, 1-10MW | cut-off, U - ORG
Cap New	CapNew_PH_IND_HeatPump	MW	market for heat pump, 30kW | heat pump, 30kW | cut-off, U - ORG	heat pump production, air, 10 kW - ORG	heat pump production, ground-source horizontal, 10 kW - ORG	heat pump production, ground-source vertical, 10 kW - ORG	Share_PH_IND_HP1	Share_PH_IND_HP2	Share_PH_IND_HP3	Share_PH_IND_HP4
Cap New	CapNew_PH_IND_H2	MW
Cap New	CapNew_SHHW_SV_Biomass	MW	Bau Kessel 10 kW - ORG
Cap New	CapNew_SHHW_SV_Electric	MW	auxiliary heating unit production, electric, 5kW | auxiliary heating unit, electric, 5kW | cut-off, U - ORG
Cap New	CapNew_SHHW_SV_Gas	MW	market for gas boiler | gas boiler | cut-off, U - ORG
Cap New	CapNew_SHHW_SV_Geothermal	MW
Cap New	CapNew_SHHW_SV_Oil	MW	heat production, light fuel oil, at boiler 10kW condensing, non-modulating | cut-off, U - NCP
Cap New	CapNew_SHHW_SV_Solar	MW	market for solar collector system, Cu flat plate collector, one-family house, combined system | solar collector system, Cu flat plate collector, one-family house, combined system | cut-off, U - ORG	Gesamtanlage Flachkollektor, verpackt - ORG	Gesamtanlage Vakuumröhrenkollektor, verpackt - ORG		Share_SHHW_SV_Solar1	Share_SHHW_SV_Solar2	Share_SHHW_SV_Solar3
Cap New	CapNew_SHHW_SV_HeatPump	MW	market for heat pump, 30kW | heat pump, 30kW | cut-off, U - ORG	heat pump production, air, 10 kW - ORG	heat pump production, ground-source horizontal, 10 kW - ORG	heat pump production, ground-source vertical, 10 kW - ORG	Share_SHHW_SV_HP1	Share_SHHW_SV_HP2	Share_SHHW_SV_HP3	Share_SHHW_SV_HP4
Cap New	CapNew_SHHW_SV_Biogas	MW
Cap New	CapNew_SHHW_SV_DistrictHeat	MW	no LCI, however, impacts are assumed to be negligible
Cap New	CapNew_SHHW_SV_HardCoal	MW
Cap New	CapNew_PH_SV_Biomass	MW	Bau Hackschnitzel-Kessel 800 kW - ORG
Cap New	CapNew_PH_SV_DistrictHeat	MW
Cap New	CapNew_PH_SV_Electric	MW	auxiliary heating unit production, electric, 5kW | auxiliary heating unit, electric, 5kW | cut-off, U - ORG
Cap New	CapNew_PH_SV_Gas	MW	market for gas boiler | gas boiler | cut-off, U - ORG
Cap New	CapNew_PH_SV_Geothermal	MW
Cap New	CapNew_PH_SV_Oil	MW	heat production, light fuel oil, at boiler 10kW condensing, non-modulating | cut-off, U - NCP
Cap New	CapNew_PH_SV_Solar	MW	market for solar collector system, Cu flat plate collector, one-family house, combined system | solar collector system, Cu flat plate collector, one-family house, combined system | cut-off, U - ORG	Gesamtanlage Flachkollektor, verpackt - ORG	Gesamtanlage Vakuumröhrenkollektor, verpackt - ORG		Share_PH_SV_Solar1	Share_PH_SV_Solar2	Share_PH_SV_Solar3
Cap New	CapNew_PH_SV_HardCoal	MW
Cap New	CapNew_PH_SV_Lignite	MW
Cap New	CapNew_PH_SV_HeatPump	MW	market for heat pump, 30kW | heat pump, 30kW | cut-off, U - ORG	heat pump production, air, 10 kW - ORG	heat pump production, ground-source horizontal, 10 kW - ORG	heat pump production, ground-source vertical, 10 kW - ORG	Share_PH_SV_HP1	Share_PH_SV_HP2	Share_PH_SV_HP3	Share_PH_SV_HP4
Cap New	CapNew_SH_RES_Electric	MW	auxiliary heating unit production, electric, 5kW | auxiliary heating unit, electric, 5kW | cut-off, U - ORG
Cap New	CapNew_SH_RES_HardCoal	MW
Cap New	CapNew_SH_RES_HeatPump	MW	market for heat pump, 30kW | heat pump, 30kW | cut-off, U - ORG	heat pump production, air, 10 kW - ORG	heat pump production, ground-source horizontal, 10 kW - ORG	heat pump production, ground-source vertical, 10 kW - ORG	Share_SH_RES_HP1	Share_SH_RES_HP2	Share_SH_RES_HP3	Share_SH_RES_HP4
Cap New	CapNew_SH_RES_Solar	MW	market for solar collector system, Cu flat plate collector, one-family house, combined system | solar collector system, Cu flat plate collector, one-family house, combined system | cut-off, U - ORG	Gesamtanlage Flachkollektor, verpackt - ORG	Gesamtanlage Vakuumröhrenkollektor, verpackt - ORG		Share_SH_RES_Solar1	Share_SH_RES_Solar2	Share_SH_RES_Solar3
Cap New	CapNew_SH_RES_Biomass	MW	Bau Kessel 10 kW - ORG	market for furnace, logs, 6kW | furnace, logs, 6kW | cut-off, U - ORG			Share_SH_RES_Biomass1	Share_SH_RES_Biomass2
Cap New	CapNew_SH_RES_Oil	MW	market for oil boiler, 10kW | oil boiler, 10kW | cut-off, U - ORG
Cap New	CapNew_SH_RES_Gas	MW	market for gas boiler | gas boiler | cut-off, U - ORG
Cap New	CapNew_SH_RES_DistrcitHeat	MW	no LCI, however, impacts are assumed to be negligible
Cap New	CapNew_HW_RES_Oil	MW	heat production, light fuel oil, at boiler 10kW, non-modulating | cut-off, U - NCP
Cap New	CapNew_HW_RES_Gas	MW	market for gas boiler | gas boiler | cut-off, U - ORG
Cap New	CapNew_HW_RES_DistrictHeat	MW	no LCI, however, impacts are assumed to be negligible
Cap New	CapNew_HW_RES_Electric	MW	auxiliary heating unit production, electric, 5kW | auxiliary heating unit, electric, 5kW | cut-off, U - ORG
Cap New	CapNew_HW_RES_HardCoal	MW
Cap New	CapNew_HW_RES_HeatPump	MW	market for heat pump, 30kW | heat pump, 30kW | cut-off, U - ORG	heat pump production, air, 10 kW - ORG	heat pump production, ground-source horizontal, 10 kW - ORG	heat pump production, ground-source vertical, 10 kW - ORG	Share_SH_RES_HP1	Share_SH_RES_HP2	Share_SH_RES_HP3	Share_SH_RES_HP4
Cap New	CapNew_HW_RES_Solar	MW	market for solar collector system, Cu flat plate collector, one-family house, combined system | solar collector system, Cu flat plate collector, one-family house, combined system | cut-off, U - ORG	Gesamtanlage Flachkollektor, verpackt - ORG	Gesamtanlage Vakuumröhrenkollektor, verpackt - ORG		Share_SH_RES_Solar1	Share_SH_RES_Solar2	Share_SH_RES_Solar3
Cap New	CapNew_HW_RES_Biomass	MW	Bau Kessel 10 kW - ORG	market for furnace, logs, 6kW | furnace, logs, 6kW | cut-off, U - ORG			Share_SH_RES_Biomass1	Share_SH_RES_Biomass2
Cap New	CapNew_HP_loc_Oil	MW	heat production, light fuel oil, at industrial furnance 1MW | cut-off, U - NCP
Cap New	CapNew_HP_loc_Gas	MW	market for industrial furnace, natural gas | industrial furnace, natural gas | cut-off, U - ORG
Cap New	CapNew_HP_loc_Geothermal	MW
Cap New	CapNew_HP_loc_Biogas	MW
Cap New	CapNew_HP_loc_Biofuel	MW
Cap New	CapNew_HP_loc_Biomass	MW	Bau Hackschnitzel-Kessel 800 kW - ORG
Cap New	CapNew_HP_loc_HeatPump	MW	market for heat pump, 30kW | heat pump, 30kW | cut-off, U - ORG	heat pump production, air, 10 kW - ORG	heat pump production, ground-source horizontal, 10 kW - ORG	heat pump production, ground-source vertical, 10 kW - ORG	Share_HP_loc_HP1	Share_HP_loc_HP2	Share_HP_loc_HP3	Share_HP_loc_HP4
Cap New	CapNew_HP_loc_Solar	MW	market for solar collector system, Cu flat plate collector, one-family house, combined system | solar collector system, Cu flat plate collector, one-family house, combined system | cut-off, U - ORG	Gesamtanlage Flachkollektor, verpackt - ORG	Gesamtanlage Vakuumröhrenkollektor, verpackt - ORG		Share_HP_loc_Solar1	Share_HP_loc_Solar2	Share_HP_loc_Solar3
Cap New	CapNew_HP_loc_LandfillGas	MW
Cap New	CapNew_HP_reg_HardCoal	MW	market for industrial furnace, coal, 1-10MW | industrial furnace, coal, 1-10MW | cut-off, U - ORG
Cap New	CapNew_HP_reg_Lignite	MW	market for industrial furnace, coal, 1-10MW | industrial furnace, coal, 1-10MW | cut-off, U - ORG
Cap New	CapNew_HP_reg_Oil	MW	heat production, light fuel oil, at industrial furnance 1MW | cut-off, U - NCP
Cap New	CapNew_HP_reg_Gas	MW	market for industrial furnace, natural gas | industrial furnace, natural gas | cut-off, U - ORG
Cap New	CapNew_HP_reg_Waste	MW
Cap New	CapNew_HP_reg_Biomass	MW	Bau Hackschnitzel-Kessel 800 kW - ORG
Cap New	CapNew_HP_reg_Electric	MW	auxiliary heating unit production, electric, 5kW | auxiliary heating unit, electric, 5kW | cut-off, U - ORG
Cap New	CapNew_CONV_H2_Electrolysis	MW	Bau Elektrolyse - ORG
Cap New	CapNew_CONV_H2_SteamReforming	MW
Cap New	CapNew_CONV_CH4_Methanation	MW	synthetic gas factory construction including DAC | synthetic gas factory | cut-off, U - ORG
Cap New	CapNew_CONV_H2_FeedIn	MW
Cap New	CapNew_CONV_PtL	MW	Synthetic Fuels - FT-PtL (Fischer-Tropsch Power-to-Liquid) MEA (amine-based shrubbing) - ORG	Synthetic Fuels - FT-PtL (Fischer-Tropsch Power-to-Liquid) Selexol - ORG			Share_CONV_PtL1	Share_CONV_PtL2
Cap New	CapNew_CONV_PBtL	MW	Synthetic Fuels - FT-PBtL (Fischer Tropsch Power-and-Biomass-to-Liquid) - ORG
Cap New	CapNew_CONV_Bioliq	MW	Construction Bioliq plant - NCP
Cap New	CapNew_CONV_Pellets	MW
Cap New	CapNew_CONV_BtL	MW	Bau BTL-Anlage (CHOREN)	Synthetic Fuels - FT-BtL (Fischer Tropsch Biomass-to-Liquid) - ORG			Share_CONV_BtL1	Share_CONV_BtL2
Cap New	CapNew_CONV_Bioethanol	MW
Cap New	CapNew_CONV_Biodiesel	MW
Cap New	CapNew_CONV_Biogas2Grid	MW	Fermenter, Nachgärer, abgedecktes Gärrestelager, Bau Fermenter-Anlage 100 kW - ORG	Fermenter, Nachgärer, abgedecktes Gärrestelager, Bau Fermenter-Anlage 250 kW - ORG	Fermenter, Nachgärer, abgedecktes Gärrestelager, Bau Fermenter-Anlage 500 kW - ORG		Share_CONV_Biogas2Grid1	Share_CONV_Biogas2Grid2	Share_CONV_Biogas2Grid3
Cap New	CapNew_CONV_Biogas	MW	Fermenter, Nachgärer, abgedecktes Gärrestelager, Bau Fermenter-Anlage 100 kW - ORG	Fermenter, Nachgärer, abgedecktes Gärrestelager, Bau Fermenter-Anlage 250 kW - ORG	Fermenter, Nachgärer, abgedecktes Gärrestelager, Bau Fermenter-Anlage 500 kW - ORG		Share_CONV_Biogas1	Share_CONV_Biogas2	Share_CONV_Biogas3
Cap New	CapNew_PCbatt_Otto_PHEV	kWh
Cap New	CapNew_PCbatt_Diesel_PHEV	kWh
Cap New	CapNew_PCbatt_H2FuelCell	kWh
Cap New	CapNew_PCbatt_BEV	kWh
Cap New	CapNew_PC_Otto	qty	transport, passenger car, medium size, petrol, EURO 5 | transport, passenger car, medium size, petrol, EURO 5 | cut-off, U - NCP
Cap New	CapNew_PC_Otto_PHEV	qty	transport, passenger car, medium size, petrol, EURO 5 | transport, passenger car, medium size, petrol, EURO 5 | cut-off, U | adapted to PHEV - NCP
Cap New	CapNew_PC_Diesel	qty	transport, passenger car, medium size, diesel, EURO 5 | transport, passenger car, medium size, diesel, EURO 5 | cut-off, U - NCP
Cap New	CapNew_PC_Diesel_PHEV	qty	transport, passenger car, medium size, diesel, EURO 5 | transport, passenger car, medium size, diesel, EURO 5 | cut-off, U | adapted to PHEV - NCP
Cap New	CapNew_PC_Gas	qty	transport, passenger car, medium size, natural gas, EURO 5 | transport, passenger car, medium size, natural gas, EURO 5 | cut-off, U - NCP
Cap New	CapNew_PC_H2FuelCell	qty	Fuel Cell Electric Vehicle (FCEV) (current) - NCP
Cap New	CapNew_PC_BEV	qty	transport, passenger car, electric | transport, passenger car, electric | cut-off, U - NCP
Cap New	CapNew_HDV_Diesel	qty
Cap New	CapNew_HDV_Hybrid	qty
Cap New	CapNew_HDV_H2FuelCell	qty
Cap New	CapNew_HDV_Gas	qty
Cap New	CapNew_LDV_Diesel	qty
Cap New	CapNew_LDV_Otto	qty
Cap New	CapNew_LDV_Electric	qty
Cap New	CapNew_LDV_Gas	qty
Cap New	CapNew_LDV_Hybrid	qty
Cap New	CapNew_LDV_H2FuelCell	qty
Cap New	CapNew_MC_Otto	qty
Cap New	CapNew_MC_Electric	qty
Cap New	CapNew_MC_H2FuelCell	qty
Cap New	CapNew_AVI_Pass	qty
Cap New	CapNew_AVI_Freight	qty
Cap New	CapNew_NAV_DieselInland	qty
Cap New	CapNew_NAV_GasInland	qty
Cap New	CapNew_NAV_DieselMarine	qty
Cap New	CapNew_PRT_Diesel	qty
Cap New	CapNew_PRT_Electric	qty
Cap New	CapNew_PRT_Gas	qty
Cap New	CapNew_PRT_H2FuelCell	qty
Cap New	CapNew_PRT_Diesel_PHEV	qty
Cap New	CapNew_RAIL_Freight_Diesel	qty
Cap New	CapNew_RAIL_Freight_Electric	qty
Cap New	CapNew_RAIL_Freight_H2FuelCell	qty
Cap New	CapNew_RAIL_Pass_Electric	qty
Cap New	CapNew_RAIL_Pass_Diesel	qty
Cap New	CapNew_RAIL_Pass_H2FuelCell	qty
Cap New	CapNew_CONV_PtL_Imp	MW	Synthetic Fuels - FT-PtL (Fischer-Tropsch Power-to-Liquid) MEA (amine-based shrubbing) - ORG	Synthetic Fuels - FT-PtL (Fischer-Tropsch Power-to-Liquid) Selexol - ORG			Share_CONV_PtL1	Share_CONV_PtL2
CapNew	CapNew_CONV_Methanation_Imp	MW	synthetic gas factory construction including DAC | synthetic gas factory | cut-off, U - ORG
Cap New	CapNew_CONV_H2prod_Electrolyis_Imp	MW	Bau Elektrolyse - ORG
Cap New	CapNew_PP_Wind_offshore_ImpSF	MW	wind turbine construction, 2 MW, offshore | wind turbine, 2 MW , offshore | cut-off, U - NCP
Cap New	CapNew_PP_Wind_onshore_ImpSF	MW	wind turbine construction, 4.5MW, onshore | wind turbine, 4.5MW, onshore | cut-off, U - ORG
Cap New	CapNew_PP_PV_power_station_ImpSF	MW	1.3 MWp open ground installation, single-Si, panel, on open ground/p/DE/I - ORG	1.3 MWp open ground installation, multi-Si, panel, on open ground/p/DE/I - ORG	1.3 MWp open ground installation, CdTe, panel, on open ground/p/DE/I - ORG		Share_PP_PV_power_station1	Share_PP_PV_power_station2	Share_PP_PV_power_station3
Cap New	CapNew_PP_CSP_ImpSF	MW	Concentrated solar power tower plant construction 20 MW (v3.5) - ORG	Concentrated solar power trough plant construction 50 MW (v3.5) - ORG			Share_PP_ImpSF_CSP1	Share_PP_ImpSF_CSP2
Cap New	CapNew_PP_Wind_onshore_Imp	MW	wind turbine construction, 4.5MW, onshore | wind turbine, 4.5MW, onshore | cut-off, U - ORG
Cap New	CapNew_PP_Wind_offshore_Imp	MW	wind turbine construction, 2 MW, offshore | wind turbine, 2 MW , offshore | cut-off, U - NCP
Cap New	CapNew_PP_PV_power_station_Imp	MW	1.3 MWp open ground installation, single-Si, panel, on open ground/p/DE/I - ORG	1.3 MWp open ground installation, multi-Si, panel, on open ground/p/DE/I - ORG	1.3 MWp open ground installation, CdTe, panel, on open ground/p/DE/I - ORG		Share_PP_PV_power_station1	Share_PP_PV_power_station2	Share_PP_PV_power_station3
Cap New	CapNew_PP_CSP_Imp	MW	Concentrated solar power tower plant construction 20 MW (v3.5) - ORG	Concentrated solar power trough plant construction 50 MW (v3.5) - ORG			Share_PP_Imp_CSP1	Share_PP_Imp_CSP2
Output + Transport Services	Output_Power_PP_Biogas	kWh/a
Output + Transport Services	Output_Power_PP_Bioliquids	kWh/a
Output + Transport Services	Output_Power_PP_Biomass	kWh/a	Kraftwerk (Dampfturbine mit 20 MWel), Waldrestholzhackschnitzel, ab Anlage - NC - NF
Output + Transport Services	Output_Power_PP_GasCC_CCS	kWh/a					Share_FOS_in_PP_GasCC_CCS	Share_BIO+EE-CH4_in_PP_GasCC_CCS	Share_H2_in_PP_GasCC_CCS
Output + Transport Services	Output_Power_PP_GasCC_noCCS	kWh/a	electricity production, natural gas, combined cycle power plant | electricity, high voltage | cut-off, U - NC	electricity production, natural gas, combined cycle power plant | electricity, high voltage | cut-off, U - NC - NF	electricity production, natural gas, combined cycle power plant | electricity, high voltage | cut-off, U - NC - NF - DEF		Share_FOS_in_PP_GasCC_noCCS	Share_BIO+EE-CH4_in_PP_GasCC_noCCS	Share_H2_in_PP_GasCC_noCCS
Output + Transport Services	Output_Power_PP_GasGT	kWh/a	electricity production, natural gas, 10MW | electricity, high voltage | cut-off, U - NC	electricity production, natural gas, 10MW | electricity, high voltage | cut-off, U - NC - NF	electricity production, natural gas, 10MW | electricity, high voltage | cut-off, U - NC - NF - DEF		Share_FOS_in_PP_GasGT	Share_BIO+EE-CH4_in_PP_GasGT	Share_H2_in_PP_GasGT
Output + Transport Services	Output_Power_PP_Geothermal	kWh/a	electricity production, deep geothermal | electricity, high voltage | cut-off, U - NC
Output + Transport Services	Output_Power_PP_HardCoal_CCS	kWh/a
Output + Transport Services	Output_Power_PP_HardCoal_noCCS	kWh/a	electricity production, hard coal | electricity, high voltage | cut-off, U - NC
Output + Transport Services	Output_Power_PP_Hydro_medium	kWh/a	electricity production, hydro, run-of-river | electricity, high voltage | cut-off, U - NC
Output + Transport Services	Output_Power_PP_Hydro_large	kWh/a	electricity production, hydro, reservoir, non-alpine region | electricity, high voltage | cut-off, U - NC
Output + Transport Services	Output_Power_PP_Hydro_small	kWh/a	electricity production, hydro, run-of-river | electricity, high voltage | cut-off, U - NC
Output + Transport Services	Output_Power_PP_LandfillGas	kWh/a
Output + Transport Services	Output_Power_PP_Lignite_CCS	kWh/a
Output + Transport Services	Output_Power_PP_Lignite_noCCS	kWh/a	electricity production, lignite | electricity, high voltage | cut-off, U - NC
Output + Transport Services	Output_Power_PP_Nuclear	kWh/a	electricity production, nuclear, pressure water reactor | electricity, high voltage | cut-off, U - NC
Output + Transport Services	Output_Power_PP_Ocean	kWh/a
Output + Transport Services	Output_Power_PP_Oil	kWh/a	electricity production, oil | electricity, high voltage | cut-off, U - NC
Output + Transport Services	Output_Power_PP_PV_buildings	kWh/a	electricity production, photovoltaic, 3kWp slanted-roof installation, single-Si, panel, mounted | electricity, low voltage | cut-off, U - NC	electricity production, photovoltaic, 3kWp slanted-roof installation, multi-Si, panel, mounted | electricity, low voltage | cut-off, U - NC	electricity production, photovoltaic, 3kWp slanted-roof installation, CIS, panel, mounted | electricity, low voltage | cut-off, U - NC		Share_PP_PV_buildings1	Share_PP_PV_buildings2	Share_PP_PV_buildings3
Output + Transport Services	Output_Power_PP_PV_power_station	kWh/a	electricity production, photovoltaic, 570kWp open ground installation, multi-Si | electricity, low voltage | cut-off, U - NC	electricity production, photovoltaic, 570kWp open ground installation, multi-Si | electricity, low voltage | cut-off, U - NC	electricity production, photovoltaic, 570kWp open ground installation, multi-Si | electricity, low voltage | cut-off, U - NC		Share_PP_PV_power_station1	Share_PP_PV_power_station2	Share_PP_PV_power_station3
Output + Transport Services	Output_Power_PP_Waste	kWh/a
Output + Transport Services	Output_Power_PP_Wind_offshore	kWh/a	electricity production, wind, 1-3MW turbine, offshore | electricity, high voltage | cut-off, U - NC
Output + Transport Services	Output_Power_PP_Wind_onshore	kWh/a	electricity production, wind, >3MW turbine, onshore | electricity, high voltage | cut-off, U - NC
Output + Transport Services	Output_Power_CHP_reg_Oil	kWh/a
Output + Transport Services	Output_Power_CHP_reg_Waste	kWh/a
Output + Transport Services	Output_Power_CHP_reg_Biomass	kWh/a	heat and power co-generation, wood chips, 6667 kW, state-of-the-art 2014 | electricity, high voltage | cut-off, U - NC - NF
Output + Transport Services	Output_Power_CHP_reg_HardCoal_CCS	kWh/a
Output + Transport Services	Output_Power_CHP_reg_HardCoal_noCCS	kWh/a	heat and power co-generation, hard coal | electricity, high voltage | cut-off, U - NC
Output + Transport Services	Output_Power_CHP_reg_Lignite_CCS	kWh/a
Output + Transport Services	Output_Power_CHP_reg_Lignite_noCCS	kWh/a	heat and power co-generation, hard coal | electricity, high voltage | cut-off, U - NC
Output + Transport Services	Output_Power_CHP_reg_Gas_CCS	kWh/a					Share_FOS_in_CHP_reg_Gas_CCS	Share_BIO+EE-CH4_in_CHP_reg_Gas_CCS	Share_H2_in_CHP_reg_Gas_CCS
Output + Transport Services	Output_Power_CHP_reg_Gas_noCCS	kWh/a	heat and power co-generation, natural gas, combined cycle power plant, 400MW electrical | electricity, high voltage | cut-off, U - NC	heat and power co-generation, natural gas, conventional power plant, 100MW electrical | electricity, high voltage | cut-off, U - NC - NF	heat and power co-generation, natural gas, 1MW electrical, lean burn | heat, district or industrial, natural gas | cut-off, U - NC - NF - DEF		Share_FOS_in_CHP_reg_Gas_noCCS	Share_BIO+EE-CH4_in_CHP_reg_Gas_noCCS	Share_H2_in_CHP_reg_Gas_noCCS
Output + Transport Services	Output_Power_CHP_loc_Biomass	kWh/a	heat and power co-generation, wood chips, 2000 kW, state-of-the-art 2014 | electricity, high voltage | cut-off, U - NC - NF
Output + Transport Services	Output_Power_CHP_loc_Biogas	kWh/a	BHKW (Gasmotor) 100 kWel Mais (90), Rindergülle (10), ab Anlage - NC - NF	BHKW (Gasmotor) 250 kWel Mais (60), Gras (30), Rindergülle (10), ab Anlage - NC - NF	BHKW (Gasmotor) 500 kWel Mais (90), Rindergülle (10), ab Anlage - NC - NF		Share_CHP_loc_Biogas1	Share_CHP_loc_Biogas2	Share_CHP_loc_Biogas3
Output + Transport Services	Output_Power_CHP_loc_Bioliquids	kWh/a
Output + Transport Services	Output_Power_CHP_loc_Geothermal	kWh/a
Output + Transport Services	Output_Power_CHP_loc_LandfillGas	kWh/a	BHKW (Gasmotor) 100 kWel Mais (90), Rindergülle (10), ab Anlage - NC - NF	BHKW (Gasmotor) 250 kWel Mais (60), Gras (30), Rindergülle (10), ab Anlage - NC - NF	BHKW (Gasmotor) 500 kWel Mais (90), Rindergülle (10), ab Anlage - NC - NF		Share_CHP_loc_Biogas1	Share_CHP_loc_Biogas2	Share_CHP_loc_Biogas3
Output + Transport Services	Output_Power_CHP_loc_GasFuelCell	kWh/a	natural gas, burned in solid oxide fuel cell 125kWe, future | electricity, low voltage | cut-off, U - NC	natural gas, burned in solid oxide fuel cell 125kWe, future | electricity, low voltage | cut-off, U - NC - NF	natural gas, burned in solid oxide fuel cell 125kWe, future | electricity, low voltage | cut-off, U - NC - NF - DEF		Share_FOS_in_GasNet	Share_BIO+EE-CH4_in_GasNet	Share_H2_in_GasNet
Output + Transport Services	Output_Power_CHP_loc_H2FuelCell	kWh/a	natural gas, burned in solid oxide fuel cell 125kWe, future | electricity, low voltage | cut-off, U - NC - NF - DEF
Output + Transport Services	Output_Power_CHP_loc_Gas	kWh/a	heat and power co-generation, natural gas, conventional power plant, 100MW electrical | electricity, high voltage | cut-off, U - NC	heat and power co-generation, natural gas, conventional power plant, 100MW electrical | electricity, high voltage | cut-off, U - NC - NF	heat and power co-generation, natural gas, conventional power plant, 100MW electrical | electricity, high voltage | cut-off, U - NC - NF - DEF		Share_FOS_in_GasNet	Share_BIO+EE-CH4_in_GasNet	Share_H2_in_GasNet
Output + Transport Services	Output_Power_CHP_loc_Oil	kWh/a
Output + Transport Services	Output_Power_CHP_IND_Biomass	kWh/a	heat and power co-generation, wood chips, 6667 kW, state-of-the-art 2014 | electricity, high voltage | cut-off, U - NC - NF
Output + Transport Services	Output_Power_CHP_IND_Gas	kWh/a	heat and power co-generation, natural gas, combined cycle power plant, 400MW electrical | electricity, high voltage | cut-off, U - NC	heat and power co-generation, natural gas, combined cycle power plant, 400MW electrical | electricity, high voltage | cut-off, U - NC - NF	heat and power co-generation, natural gas, combined cycle power plant, 400MW electrical | electricity, high voltage | cut-off, U - NC - NF - DEF		Share_FOS_in_GasNet	Share_BIO+EE-CH4_in_GasNet	Share_H2_in_GasNet
Output + Transport Services	Output_Power_CHP_IND_HardCoal	kWh/a	heat and power co-generation, hard coal | electricity, high voltage | cut-off, U - NC
Output + Transport Services	Output_Power_CHP_IND_Lignite	kWh/a	heat and power co-generation, lignite | electricity, high voltage | cut-off, U - NC
Output + Transport Services	Output_Power_CHP_IND_Oil	kWh/a
Output + Transport Services	Output_Power_CHP_IND_GasFuelCell	kWh/a	natural gas, burned in solid oxide fuel cell 125kWe, future | electricity, low voltage | cut-off, U - NC	natural gas, burned in solid oxide fuel cell 125kWe, future | electricity, low voltage | cut-off, U - NC - NF	natural gas, burned in solid oxide fuel cell 125kWe, future | electricity, low voltage | cut-off, U - NC - NF - DEF		Share_FOS_in_GasNet	Share_BIO+EE-CH4_in_GasNet	Share_H2_in_GasNet
Output + Transport Services	Output_Power_CHP_IND_Gas_BHKW	kWh/a	heat and power co-generation, natural gas, 1MW electrical, lean burn | electricity, high voltage | cut-off, U - NC	heat and power co-generation, natural gas, 1MW electrical, lean burn | electricity, high voltage | cut-off, U - NC - NF	heat and power co-generation, natural gas, 1MW electrical, lean burn | electricity, high voltage | cut-off, U - NC - NF - DEF		Share_FOS_in_GasNet	Share_BIO+EE-CH4_in_GasNet	Share_H2_in_GasNet
Output + Transport Services	Output_Power_CHP_IND_LandfillGas	kWh/a	BHKW (Gasmotor) 100 kWel Mais (90), Rindergülle (10), ab Anlage - NC - NF	BHKW (Gasmotor) 250 kWel Mais (60), Gras (30), Rindergülle (10), ab Anlage - NC - NF	BHKW (Gasmotor) 500 kWel Mais (90), Rindergülle (10), ab Anlage - NC - NF		Share_CHP_IND_Biogas1	Share_CHP_IND_Biogas2	Share_CHP_IND_Biogas3
Output + Transport Services	Output_Power_CHP_IND_Bioliquids	kWh/a
Output + Transport Services	Output_Power_CHP_IND_H2FuelCell	kWh/a	natural gas, burned in solid oxide fuel cell 125kWe, future | electricity, low voltage | cut-off, U - NC - NF - DEF
Output + Transport Services	Output_Power_CHP_IND_Biogas	kWh/a	BHKW (Gasmotor) 100 kWel Mais (90), Rindergülle (10), ab Anlage - NC - NF	BHKW (Gasmotor) 250 kWel Mais (60), Gras (30), Rindergülle (10), ab Anlage - NC - NF	BHKW (Gasmotor) 500 kWel Mais (90), Rindergülle (10), ab Anlage - NC - NF		Share_CHP_IND_Biogas1	Share_CHP_IND_Biogas2	Share_CHP_IND_Biogas3
Output + Transport Services	Output_Power_CHP_SV_GasMicro	kWh/a	heat and power co-generation, natural gas, 50kW electrical, lean burn | electricity, low voltage | cut-off, U - NC				Share_FOS_in_GasNet	Share_BIO+EE-CH4_in_GasNet	Share_H2_in_GasNet
Output + Transport Services	Output_Power_CHP_SV_Biogas	kWh/a	BHKW (Gasmotor) 100 kWel Mais (90), Rindergülle (10), ab Anlage - NC - NF	BHKW (Gasmotor) 500 kWel Mais (90), Rindergülle (10), ab Anlage - NC - NF	BHKW (Gasmotor) 500 kWel Mais (90), Rindergülle (10), ab Anlage - NC - NF		Share_CHP_SV_Biogas1	Share_CHP_SV_Biogas2	Share_CHP_SV_Biogas3
Output + Transport Services	Output_Power_CHP_SV_Biomass	kWh/a	wood pellets, burned in stirling heat and power co-generation unit, 3kW electrical, future | electricity, low voltage | cut-off, U - NC - NF
Output + Transport Services	Output_Power_CHP_SV_Gas	kWh/a	heat and power co-generation, natural gas, 1MW electrical, lean burn | electricity, high voltage | cut-off, U - NC	heat and power co-generation, natural gas, 50kW electrical, lean burn | electricity, low voltage | cut-off, U - NC - NF	heat and power co-generation, natural gas, 50kW electrical, lean burn | electricity, low voltage | cut-off, U - NC - NF - DEF		Share_FOS_in_GasNet	Share_BIO+EE-CH4_in_GasNet	Share_H2_in_GasNet
Output + Transport Services	Output_Power_CHP_SV_Oil	kWh/a
Output + Transport Services	Output_Power_CHP_SV_GasFuelCell	kWh/a	natural gas, burned in solid oxide fuel cell 125kWe, future | electricity, low voltage | cut-off, U - NC	natural gas, burned in solid oxide fuel cell 125kWe, future | electricity, low voltage | cut-off, U - NC - NF	natural gas, burned in solid oxide fuel cell 125kWe, future | electricity, low voltage | cut-off, U - NC - NF - DEF		Share_FOS_in_GasNet	Share_BIO+EE-CH4_in_GasNet	Share_H2_in_GasNet
Output + Transport Services	Output_Power_CHP_SV_Bioliquids	kWh/a
Output + Transport Services	Output_Power_CHP_SV_H2FuelCell	kWh/a	natural gas, burned in polymer electrolyte membrane fuel cell 2kWe, future | electricity, low voltage | cut-off, U - NC - NF - DEF
Output + Transport Services	Output_Power_CHP_RES_Biomass	kWh/a	wood pellets, burned in stirling heat and power co-generation unit, 3kW electrical, future | electricity, low voltage | cut-off, U - NC - NF
Output + Transport Services	Output_Power_CHP_RES_Gas	kWh/a	heat and power co-generation, natural gas, 50kW electrical, lean burn | electricity, low voltage | cut-off, U - NC	heat and power co-generation, natural gas, 50kW electrical, lean burn | electricity, low voltage | cut-off, U - NC - NF	heat and power co-generation, natural gas, 50kW electrical, lean burn | electricity, low voltage | cut-off, U - NC - NF - DEF		Share_FOS_in_GasNet	Share_BIO+EE-CH4_in_GasNet	Share_H2_in_GasNet
Output + Transport Services	Output_Power_CHP_RES_GasFuelCell	kWh/a	natural gas, burned in polymer electrolyte membrane fuel cell 2kWe, future | electricity, low voltage | cut-off, U - NC	natural gas, burned in polymer electrolyte membrane fuel cell 2kWe, future | electricity, low voltage | cut-off, U - NC - NF	natural gas, burned in polymer electrolyte membrane fuel cell 2kWe, future | electricity, low voltage | cut-off, U - NC - NF - DEF		Share_FOS_in_GasNet	Share_BIO+EE-CH4_in_GasNet	Share_H2_in_GasNet
Output + Transport Services	Output_Heat_CHP_reg_Oil	kWh/a
Output + Transport Services	Output_Heat_CHP_reg_Waste	kWh/a
Output + Transport Services	Output_Heat_CHP_reg_Biomass	kWh/a	heat and power co-generation, wood chips, 6667 kW, state-of-the-art 2014 | heat, district or industrial, other than natural gas | cut-off, U - NC - NF
Output + Transport Services	Output_Heat_CHP_reg_HardCoal_CCS	kWh/a
Output + Transport Services	Output_Heat_CHP_reg_HardCoal_noCCS	kWh/a	heat and power co-generation, hard coal | heat, district or industrial, other than natural gas | cut-off, U - NC
Output + Transport Services	Output_Heat_CHP_reg_Lignite_CCS	kWh/a
Output + Transport Services	Output_Heat_CHP_reg_Lignite_noCCS	kWh/a	heat and power co-generation, lignite | heat, district or industrial, other than natural gas | cut-off, U - NC
Output + Transport Services	Output_Heat_CHP_reg_Gas_CCS	kWh/a					Share_FOS_in_CHP_reg_Gas_CCS	Share_BIO+EE-CH4_in_CHP_reg_Gas_CCS	Share_H2_in_CHP_reg_Gas_CCS
Output + Transport Services	Output_Heat_CHP_reg_Gas_noCCS	kWh/a	heat and power co-generation, natural gas, combined cycle power plant, 400MW electrical | heat, district or industrial, natural gas | cut-off, U - NC	heat and power co-generation, natural gas, combined cycle power plant, 400MW electrical | heat, district or industrial, natural gas | cut-off, U - NC - NF	heat and power co-generation, natural gas, combined cycle power plant, 400MW electrical | heat, district or industrial, natural gas | cut-off, U - NC - NF - DEF		Share_FOS_in_CHP_reg_Gas_noCCS	Share_BIO+EE-CH4_in_CHP_reg_Gas_noCCS	Share_H2_in_CHP_reg_Gas_noCCS
Output + Transport Services	Output_Heat_CHP_loc_Biomass	kWh/a	heat and power co-generation, wood chips, 2000 kW, state-of-the-art 2014 | heat, district or industrial, other than natural gas | cut-off, U - NC - NF
Output + Transport Services	Output_Heat_CHP_loc_Biogas	kWh/a	no LCI, however, impacts are assumed to be negligible
Output + Transport Services	Output_Heat_CHP_loc_Bioliquids	kWh/a
Output + Transport Services	Output_Heat_CHP_loc_Geothermal	kWh/a	no LCI, however, impacts are assumed to be negligible
Output + Transport Services	Output_Heat_CHP_loc_LandfillGas	kWh/a
Output + Transport Services	Output_Heat_CHP_loc_GasFuelCell	kWh/a	natural gas, burned in solid oxide fuel cell 125kWe, future | heat, future | cut-off, U - NC	natural gas, burned in solid oxide fuel cell 125kWe, future | heat, future | cut-off, U - NC - NF	natural gas, burned in solid oxide fuel cell 125kWe, future | heat, future | cut-off, U - NC - NF - DEF		Share_FOS_in_GasNet	Share_BIO+EE-CH4_in_GasNet	Share_H2_in_GasNet
Output + Transport Services	Output_Heat_CHP_loc_H2FuelCell	kWh/a	natural gas, burned in solid oxide fuel cell 125kWe, future | heat, future | cut-off, U - NC - NF - DEF
Output + Transport Services	Output_Heat_CHP_loc_Gas	kWh/a	heat and power co-generation, natural gas, conventional power plant, 100MW electrical | heat, district or industrial, natural gas | cut-off, U - NC	heat and power co-generation, natural gas, conventional power plant, 100MW electrical | heat, district or industrial, natural gas | cut-off, U - NC - NF	heat and power co-generation, natural gas, conventional power plant, 100MW electrical | heat, district or industrial, natural gas | cut-off, U - NC - NF - DEF		Share_FOS_in_GasNet	Share_BIO+EE-CH4_in_GasNet	Share_H2_in_GasNet
Output + Transport Services	Output_Heat_CHP_loc_Oil	kWh/a
Output + Transport Services	Output_Heat_CHP_IND_Biomass	kWh/a	heat and power co-generation, wood chips, 6667 kW, state-of-the-art 2014 | heat, district or industrial, other than natural gas | cut-off, U - NC - NF
Output + Transport Services	Output_Heat_CHP_IND_Gas	kWh/a	heat and power co-generation, natural gas, combined cycle power plant, 400MW electrical | heat, district or industrial, natural gas | cut-off, U - NC	heat and power co-generation, natural gas, combined cycle power plant, 400MW electrical | heat, district or industrial, natural gas | cut-off, U - NC - NF	heat and power co-generation, natural gas, combined cycle power plant, 400MW electrical | heat, district or industrial, natural gas | cut-off, U - NC - NF - DEF		Share_FOS_in_GasNet	Share_BIO+EE-CH4_in_GasNet	Share_H2_in_GasNet
Output + Transport Services	Output_Heat_CHP_IND_HardCoal	kWh/a	heat and power co-generation, hard coal | heat, district or industrial, other than natural gas | cut-off, U - NC
Output + Transport Services	Output_Heat_CHP_IND_Lignite	kWh/a	heat and power co-generation, lignite | heat, district or industrial, other than natural gas | cut-off, U - NC
Output + Transport Services	Output_Heat_CHP_IND_Oil	kWh/a
Output + Transport Services	Output_Heat_CHP_IND_GasFuelCell	kWh/a	natural gas, burned in solid oxide fuel cell 125kWe, future | heat, future | cut-off, U - NC	natural gas, burned in solid oxide fuel cell 125kWe, future | heat, future | cut-off, U - NC - NF	natural gas, burned in solid oxide fuel cell 125kWe, future | heat, future | cut-off, U - NC - NF - DEF		Share_FOS_in_GasNet	Share_BIO+EE-CH4_in_GasNet	Share_H2_in_GasNet
Output + Transport Services	Output_Heat_CHP_IND_Gas_BHKW	kWh/a	heat and power co-generation, natural gas, 1MW electrical, lean burn | heat, district or industrial, natural gas | cut-off, U - NC	heat and power co-generation, natural gas, 1MW electrical, lean burn | heat, district or industrial, natural gas | cut-off, U - NC - NF	heat and power co-generation, natural gas, 1MW electrical, lean burn | heat, district or industrial, natural gas | cut-off, U - NC - NF - DEF		Share_FOS_in_GasNet	Share_BIO+EE-CH4_in_GasNet	Share_H2_in_GasNet
Output + Transport Services	Output_Heat_CHP_IND_LandfillGas	kWh/a	no LCI, however, impacts are assumed to be negligible
Output + Transport Services	Output_Heat_CHP_IND_Bioliquids	kWh/a
Output + Transport Services	Output_Heat_CHP_IND_H2FuelCell	kWh/a	natural gas, burned in solid oxide fuel cell 125kWe, future | heat, future | cut-off, U - NC - NF - DEF
Output + Transport Services	Output_Heat_CHP_IND_Biogas	kWh/a	no LCI, however, impacts are assumed to be negligible
Output + Transport Services	Output_Heat_CHP_SV_GasMicro	kWh/a	heat and power co-generation, natural gas, 50kW electrical, lean burn | heat, central or small-scale, natural gas | cut-off, U - NC	heat and power co-generation, natural gas, 50kW electrical, lean burn | heat, central or small-scale, natural gas | cut-off, U - NC - NF	heat and power co-generation, natural gas, 50kW electrical, lean burn | heat, central or small-scale, natural gas | cut-off, U - NC - NF - DEF		Share_FOS_in_GasNet	Share_BIO+EE-CH4_in_GasNet	Share_H2_in_GasNet
Output + Transport Services	Output_Heat_CHP_SV_Biogas	kWh/a	no LCI, however, impacts are assumed to be negligible
Output + Transport Services	Output_Heat_CHP_SV_Biomass	kWh/a	wood pellets, burned in stirling heat and power co-generation unit, 3kW electrical, future | heat, future | cut-off, U - NC - NF
Output + Transport Services	Output_Heat_CHP_SV_Gas	kWh/a	heat and power co-generation, natural gas, 1MW electrical, lean burn | heat, district or industrial, natural gas | cut-off, U - NC	heat and power co-generation, natural gas, 1MW electrical, lean burn | heat, district or industrial, natural gas | cut-off, U - NC - NF	heat and power co-generation, natural gas, 1MW electrical, lean burn | heat, district or industrial, natural gas | cut-off, U - NC - NF - DEF		Share_FOS_in_GasNet	Share_BIO+EE-CH4_in_GasNet	Share_H2_in_GasNet
Output + Transport Services	Output_Heat_CHP_SV_Oil	kWh/a
Output + Transport Services	Output_Heat_CHP_SV_GasFuelCell	kWh/a	natural gas, burned in solid oxide fuel cell 125kWe, future | heat, future | cut-off, U - NC	natural gas, burned in solid oxide fuel cell 125kWe, future | heat, future | cut-off, U - NC - NF	natural gas, burned in solid oxide fuel cell 125kWe, future | heat, future | cut-off, U - NC - NF - DEF		Share_FOS_in_GasNet	Share_BIO+EE-CH4_in_GasNet	Share_H2_in_GasNet
Output + Transport Services	Output_Heat_CHP_SV_Bioliquids	kWh/a
Output + Transport Services	Output_Heat_CHP_SV_H2FuelCell	kWh/a	natural gas, burned in polymer electrolyte membrane fuel cell 2kWe, future | heat, future | cut-off, U - NC - NF - DEF
Output + Transport Services	Output_Heat_CHP_RES_Biomass	kWh/a	wood pellets, burned in stirling heat and power co-generation unit, 3kW electrical, future | heat, future | cut-off, U - NC - NF
Output + Transport Services	Output_Heat_CHP_RES_Gas	kWh/a	heat and power co-generation, natural gas, 50kW electrical, lean burn | heat, central or small-scale, natural gas | cut-off, U - NC	heat and power co-generation, natural gas, 50kW electrical, lean burn | heat, central or small-scale, natural gas | cut-off, U - NC - NF	heat and power co-generation, natural gas, 50kW electrical, lean burn | heat, central or small-scale, natural gas | cut-off, U - NC - NF - DEF		Share_FOS_in_GasNet	Share_BIO+EE-CH4_in_GasNet	Share_H2_in_GasNet
Output + Transport Services	Output_Heat_CHP_RES_GasFuelCell	kWh/a	natural gas, burned in polymer electrolyte membrane fuel cell 2kWe, future | heat, future | cut-off, U - NC	natural gas, burned in polymer electrolyte membrane fuel cell 2kWe, future | heat, future | cut-off, U - NC - NF	natural gas, burned in polymer electrolyte membrane fuel cell 2kWe, future | heat, future | cut-off, U - NC - NF - DEF		Share_FOS_in_GasNet	Share_BIO+EE-CH4_in_GasNet	Share_H2_in_GasNet
Output + Transport Services	Output_Heat_HP_reg_HardCoal	kWh/a	heat production, at hard coal industrial furnace 1-10MW | heat, district or industrial, other than natural gas | cut-off, U - NC
Output + Transport Services	Output_Heat_HP_reg_Lignite	kWh/a	heat production, at hard coal industrial furnace 1-10MW | heat, district or industrial, other than natural gas | cut-off, U - NC
Output + Transport Services	Output_Heat_HP_reg_Oil	kWh/a	heat production, light fuel oil, at industrial furnace 1MW | heat, district or industrial, other than natural gas | cut-off, U - NC
Output + Transport Services	Output_Heat_HP_reg_Gas	kWh/a	heat production, natural gas, at industrial furnace >100kW | heat, district or industrial, natural gas | cut-off, U - NC	heat production, natural gas, at industrial furnace >100kW | heat, district or industrial, natural gas | cut-off, U - NC - NF	heat production, natural gas, at industrial furnace >100kW | heat, district or industrial, natural gas | cut-off, U - NC - NF - DEF		Share_FOS_in_GasNet	Share_BIO+EE-CH4_in_GasNet	Share_H2_in_GasNet
Output + Transport Services	Output_Heat_HP_reg_Waste	kWh/a
Output + Transport Services	Output_Heat_HP_reg_Biomass	kWh/a	Hackschnitzel-Kessel 800 kW, Waldrestholz (Fichte), ab Anlage - NC - NF
Output + Transport Services	Output_Heat_HP_reg_Electric	kWh/a	no LCI, however, impacts are assumed to be negligible
Output + Transport Services	Output_Heat_HP_loc_Oil	kWh/a	heat production, light fuel oil, at industrial furnace 1MW | heat, district or industrial, other than natural gas | cut-off, U - NC
Output + Transport Services	Output_Heat_HP_loc_Gas	kWh/a	heat production, natural gas, at industrial furnace >100kW | heat, district or industrial, natural gas | cut-off, U - NC	heat production, natural gas, at industrial furnace >100kW | heat, district or industrial, natural gas | cut-off, U - NC - NF	heat production, natural gas, at industrial furnace >100kW | heat, district or industrial, natural gas | cut-off, U - NC - NF - DEF		Share_FOS_in_GasNet	Share_BIO+EE-CH4_in_GasNet	Share_H2_in_GasNet
Output + Transport Services	Output_Heat_HP_loc_Geothermal	kWh/a
Output + Transport Services	Output_Heat_HP_loc_Biogas	kWh/a
Output + Transport Services	Output_Heat_HP_loc_Bioliquids	kWh/a
Output + Transport Services	Output_Heat_HP_loc_Biomass	kWh/a	Hackschnitzel-Kessel 800 kW, Waldrestholz (Fichte), ab Anlage - NC - NF
Output + Transport Services	Output_Heat_HP_loc_HeatPump	kWh/a	heat production, at heat pump 30kW, allocation exergy | heat, central or small-scale, other than natural gas | cut-off, U - NC - NF	heat, air heat pump 10 kW - NC - NF	heat, horizontal ground-source heat pump 10 kW - NC - NF	heat, vertical ground-source heat pump 10 kW - NC - NF	Share_HP_loc_HP1	Share_HP_loc_HP2	Share_HP_loc_HP3	Share_HP_loc_HP4
Output + Transport Services	Output_Heat_HP_loc_LandfillGas	kWh/a
Output + Transport Services	Output_Heat_HP_loc_Solar	kWh/a	operation, solar collector system, Cu flat plate collector, one-family house, for combined system | heat, central or small-scale, other than natural gas | cut-off, U - NC	Wärmeerzeugung Flachkollektoren (Gebäude) - NC	Wärmeerzeugung Vakuumröhrenkollektoren (Gebäude) - NC		Share_HP_loc_Solar1	Share_HP_loc_Solar2	Share_HP_loc_Solar3
Output + Transport Services	Output_Heat_SH_RES_Electric	kWh/a	no LCI, however, impacts are assumed to be negligible
Output + Transport Services	Output_Heat_SH_RES_HardCoal	kWh/a
Output + Transport Services	Output_Heat_SH_RES_HeatPump	kWh/a	heat production, at heat pump 30kW, allocation exergy | heat, central or small-scale, other than natural gas | cut-off, U - NC - NF	heat, air heat pump 10 kW - NC - NF	heat, horizontal ground-source heat pump 10 kW - NC - NF	heat, vertical ground-source heat pump 10 kW - NC - NF	Share_SH_RES_HP1	Share_SH_RES_HP2	Share_SH_RES_HP3	Share_SH_RES_HP4
Output + Transport Services	Output_Heat_SH_RES_Solar	kWh/a	operation, solar collector system, Cu flat plate collector, one-family house, for combined system | heat, central or small-scale, other than natural gas | cut-off, U - NC	Wärmeerzeugung Flachkollektoren (Gebäude) - NC	Wärmeerzeugung Vakuumröhrenkollektoren (Gebäude) - NC		Share_SH_RES_Solar1	Share_SH_RES_Solar2	Share_SH_RES_Solar3
Output + Transport Services	Output_Heat_SH_RES_Biomass	kWh/a	Pelletzentralheizung 10 kW, A1 Holzpellets, ab Anlage - NC - NF	heat production, mixed logs, at wood heater 6kW, state-of-the-art 2014 | heat, central or small-scale, other than natural gas | cut-off, U - NC - NF			Share_SH_RES_Biomass1	Share_SH_RES_Biomass2
Output + Transport Services	Output_Heat_SH_RES_Oil	kWh/a	heat production, light fuel oil, at boiler 100kW condensing, non-modulating | heat, central or small-scale, other than natural gas | cut-off, U - NC
Output + Transport Services	Output_Heat_SH_RES_Gas	kWh/a	heat production, natural gas, at boiler condensing modulating <100kW | heat, central or small-scale, natural gas | cut-off, U - NC	heat production, natural gas, at boiler modulating <100kW | heat, central or small-scale, natural gas | cut-off, U - NC - NF	heat production, natural gas, at boiler modulating <100kW | heat, central or small-scale, natural gas | cut-off, U - NC - NF - DEF		Share_FOS_in_GasNet	Share_BIO+EE-CH4_in_GasNet	Share_H2_in_GasNet
Output + Transport Services	Output_Heat_SH_RES_DistrictHeat	kWh/a	no LCI, however, impacts are assumed to be negligible
Output + Transport Services	Output_Heat_HW_RES_Electric	kWh/a	no LCI, however, impacts are assumed to be negligible
Output + Transport Services	Output_Heat_HW_RES_HardCoal	kWh/a
Output + Transport Services	Output_Heat_HW_RES_HeatPump	kWh/a	heat production, at heat pump 30kW, allocation exergy | heat, central or small-scale, other than natural gas | cut-off, U - NC - NF	heat, air heat pump 10 kW - NC - NF	heat, horizontal ground-source heat pump 10 kW - NC - NF	heat, vertical ground-source heat pump 10 kW - NC - NF	Share_SH_RES_HP1	Share_SH_RES_HP2	Share_SH_RES_HP3	Share_SH_RES_HP4
Output + Transport Services	Output_Heat_HW_RES_Solar	kWh/a	operation, solar collector system, Cu flat plate collector, one-family house, for combined system | heat, central or small-scale, other than natural gas | cut-off, U - NC
Output + Transport Services	Output_Heat_HW_RES_Biomass	kWh/a	Pelletzentralheizung 10 kW, A1 Holzpellets, ab Anlage - NC - NF	heat production, mixed logs, at wood heater 6kW, state-of-the-art 2014 | heat, central or small-scale, other than natural gas | cut-off, U - NC - NF			Share_SH_RES_Biomass1	Share_SH_RES_Biomass2
Output + Transport Services	Output_Heat_HW_RES_Oil	kWh/a	heat production, light fuel oil, at boiler 100kW condensing, non-modulating | heat, central or small-scale, other than natural gas | cut-off, U - NC
Output + Transport Services	Output_Heat_HW_RES_Gas	kWh/a	heat production, natural gas, at boiler condensing modulating <100kW | heat, central or small-scale, natural gas | cut-off, U - NC				Share_FOS_in_GasNet	Share_BIO+EE-CH4_in_GasNet	Share_H2_in_GasNet
Output + Transport Services	Output_Heat_HW_RES_DistrictHeat	kWh/a	no LCI, however, impacts are assumed to be negligible
Output + Transport Services	Output_Heat_SHHW_SV_Gas	kWh/a	heat production, natural gas, at boiler condensing modulating <100kW | heat, central or small-scale, natural gas | cut-off, U - NC	heat production, natural gas, at boiler modulating <100kW | heat, central or small-scale, natural gas | cut-off, U - NC - NF	heat production, natural gas, at boiler modulating <100kW | heat, central or small-scale, natural gas | cut-off, U - NC - NF - DEF		Share_FOS_in_GasNet	Share_BIO+EE-CH4_in_GasNet	Share_H2_in_GasNet
Output + Transport Services	Output_Heat_SHHW_SV_Oil	kWh/a	heat production, light fuel oil, at boiler 10kW, non-modulating | heat, central or small-scale, other than natural gas | cut-off, U - NC
Output + Transport Services	Output_Heat_SHHW_SV_Electric	kWh/a	no LCI, however, impacts are assumed to be negligible
Output + Transport Services	Output_Heat_SHHW_SV_Geothermal	kWh/a
Output + Transport Services	Output_Heat_SHHW_SV_Biomass	kWh/a	Pelletzentralheizung 10 kW, A1 Holzpellets, ab Anlage - NC - NF
Output + Transport Services	Output_Heat_SHHW_SV_Solar	kWh/a	operation, solar collector system, Cu flat plate collector, one-family house, for combined system | heat, central or small-scale, other than natural gas | cut-off, U - NC	Wärmeerzeugung Flachkollektoren (Gebäude) - NC	Wärmeerzeugung Vakuumröhrenkollektoren (Gebäude) - NC		Share_SHHW_SV_Solar1	Share_SHHW_SV_Solar2	Share_SHHW_SV_Solar3
Output + Transport Services	Output_Heat_SHHW_SV_HeatPump	kWh/a	heat production, at heat pump 30kW, allocation exergy | heat, central or small-scale, other than natural gas | cut-off, U - NC - NF	heat, air heat pump 10 kW - NC - NF	heat, horizontal ground-source heat pump 10 kW - NC - NF	heat, vertical ground-source heat pump 10 kW - NC - NF	Share_SHHW_SV_HP1	Share_SHHW_SV_HP2	Share_SHHW_SV_HP3	Share_SHHW_SV_HP4
Output + Transport Services	Output_Heat_SHHW_SV_Biogas	kWh/a
Output + Transport Services	Output_Heat_SHHW_SV_DistrictHeat	kWh/a	no LCI, however, impacts are assumed to be negligible
Output + Transport Services	Output_Heat_SHHW_SV_HardCoal	kWh/a
Output + Transport Services	Output_Heat_PH_SV_Biomass	kWh/a	Pelletzentralheizung 10 kW, A1 Holzpellets, ab Anlage - NC - NF
Output + Transport Services	Output_Heat_PH_SV_DistrictHeat	kWh/a	no LCI, however, impacts are assumed to be negligible
Output + Transport Services	Output_Heat_PH_SV_Electric	kWh/a	no LCI, however, impacts are assumed to be negligible
Output + Transport Services	Output_Heat_PH_SV_Gas	kWh/a	heat production, natural gas, at boiler modulating <100kW | heat, central or small-scale, natural gas | cut-off, U - NC	heat production, natural gas, at boiler modulating <100kW | heat, central or small-scale, natural gas | cut-off, U - NC - NF	heat production, natural gas, at boiler modulating <100kW | heat, central or small-scale, natural gas | cut-off, U - NC - NF - DEF		Share_FOS_in_GasNet	Share_BIO+EE-CH4_in_GasNet	Share_H2_in_GasNet
Output + Transport Services	Output_Heat_PH_SV_Geothermal	kWh/a
Output + Transport Services	Output_Heat_PH_SV_Oil	kWh/a	heat production, light fuel oil, at boiler 100kW condensing, non-modulating | heat, central or small-scale, other than natural gas | cut-off, U - NC
Output + Transport Services	Output_Heat_PH_SV_Solar	kWh/a	operation, solar collector system, Cu flat plate collector, one-family house, for combined system | heat, central or small-scale, other than natural gas | cut-off, U - NC	Wärmeerzeugung Flachkollektoren (Gebäude) - NC	Wärmeerzeugung Vakuumröhrenkollektoren (Gebäude) - NC		Share_PH_SV_Solar1	Share_PH_SV_Solar2	Share_PH_SV_Solar3
Output + Transport Services	Output_Heat_PH_SV_HardCoal	kWh/a
Output + Transport Services	Output_Heat_PH_SV_Lignite	kWh/a
Output + Transport Services	Output_Heat_PH_SV_HeatPump	kWh/a	heat production, at heat pump 30kW, allocation exergy | heat, central or small-scale, other than natural gas | cut-off, U - NC - NF	heat, air heat pump 10 kW - NC - NF	heat, horizontal ground-source heat pump 10 kW - NC - NF	heat, vertical ground-source heat pump 10 kW - NC - NF	Share_PH_SV_HP1	Share_PH_SV_HP2	Share_PH_SV_HP3	Share_PH_SV_HP4
Output + Transport Services	Output_Heat_SHHW_IND_Biomass	kWh/a	Hackschnitzel-Kessel 800 kW, Waldrestholz (Fichte), ab Anlage - NC - NF
Output + Transport Services	Output_Heat_SHHW_IND_DistrictHeat	kWh/a	no LCI, however, impacts are assumed to be negligible
Output + Transport Services	Output_Heat_SHHW_IND_Electric	kWh/a	no LCI, however, impacts are assumed to be negligible
Output + Transport Services	Output_Heat_SHHW_IND_Gas	kWh/a	heat production, natural gas, at industrial furnace >100kW | heat, district or industrial, natural gas | cut-off, U - NC	heat production, natural gas, at industrial furnace >100kW | heat, district or industrial, natural gas | cut-off, U - NC - NF	heat production, natural gas, at industrial furnace >100kW | heat, district or industrial, natural gas | cut-off, U - NC - NF - DEF		Share_FOS_in_GasNet	Share_BIO+EE-CH4_in_GasNet	Share_H2_in_GasNet
Output + Transport Services	Output_Heat_SHHW_IND_Geothermal	kWh/a
Output + Transport Services	Output_Heat_SHHW_IND_HardCoal	kWh/a	heat production, at hard coal industrial furnace 1-10MW | heat, district or industrial, other than natural gas | cut-off, U - NC
Output + Transport Services	Output_Heat_SHHW_IND_Lignite	kWh/a	heat production, at hard coal industrial furnace 1-10MW | heat, district or industrial, other than natural gas | cut-off, U - NC
Output + Transport Services	Output_Heat_SHHW_IND_Oil	kWh/a	heat production, light fuel oil, at industrial furnace 1MW | heat, district or industrial, other than natural gas | cut-off, U - NC
Output + Transport Services	Output_Heat_SHHW_IND_Solar	kWh/a	operation, solar collector system, Cu flat plate collector, one-family house, for combined system | heat, central or small-scale, other than natural gas | cut-off, U - NC	Wärmeerzeugung Flachkollektoren (Gebäude) - NC	Wärmeerzeugung Vakuumröhrenkollektoren (Gebäude) - NC		Share_SHHW_IND_Solar1	Share_SHHW_IND_Solar2	Share_SHHW_IND_Solar3
Output + Transport Services	Output_Heat_SHHW_IND_HeatPump	kWh/a	heat production, at heat pump 30kW, allocation exergy | heat, central or small-scale, other than natural gas | cut-off, U - NC - NF	heat, air heat pump 10 kW - NC - NF	heat, horizontal ground-source heat pump 10 kW - NC - NF	heat, vertical ground-source heat pump 10 kW - NC - NF	Share_SHHW_IND_HP1	Share_SHHW_IND_HP2	Share_SHHW_IND_HP3	Share_SHHW_IND_HP4
Output + Transport Services	Output_Heat_PH_IND_Biomass	kWh/a	Hackschnitzel-Kessel 800 kW, Waldrestholz (Fichte), ab Anlage - NC - NF
Output + Transport Services	Output_Heat_PH_IND_Electric	kWh/a	no LCI, however, impacts are assumed to be negligible
Output + Transport Services	Output_Heat_PH_IND_Gas	kWh/a	heat production, natural gas, at industrial furnace >100kW | heat, district or industrial, natural gas | cut-off, U - NC	heat production, natural gas, at industrial furnace >100kW | heat, district or industrial, natural gas | cut-off, U - NC - NF	heat production, natural gas, at industrial furnace >100kW | heat, district or industrial, natural gas | cut-off, U - NC - NF - DEF		Share_FOS_in_GasNet	Share_BIO+EE-CH4_in_GasNet	Share_H2_in_GasNet
Output + Transport Services	Output_Heat_PH_IND_Geothermal	kWh/a
Output + Transport Services	Output_Heat_PH_IND_HardCoal	kWh/a	heat production, at hard coal industrial furnace 1-10MW | heat, district or industrial, other than natural gas | cut-off, U - NC
Output + Transport Services	Output_Heat_PH_IND_Lignite	kWh/a	heat production, at hard coal industrial furnace 1-10MW | heat, district or industrial, other than natural gas | cut-off, U - NC
Output + Transport Services	Output_Heat_PH_IND_Oil	kWh/a	heat production, light fuel oil, at industrial furnace 1MW | heat, district or industrial, other than natural gas | cut-off, U - NC
Output + Transport Services	Output_Heat_PH_IND_Solar	kWh/a	operation, solar collector system, Cu flat plate collector, one-family house, for combined system | heat, central or small-scale, other than natural gas | cut-off, U - NC	Wärmeerzeugung Flachkollektoren (Gebäude) - NC	Wärmeerzeugung Vakuumröhrenkollektoren (Gebäude) - NC		Share_PH_IND_Solar1	Share_PH_IND_Solar2	Share_PH_IND_Solar3
Output + Transport Services	Output_Heat_PH_IND_DistrictHeat	kWh/a	no LCI, however, impacts are assumed to be negligible
Output + Transport Services	Output_Heat_PH_IND_OilProducts	kWh/a	heat production, light fuel oil, at industrial furnace 1MW | heat, district or industrial, other than natural gas | cut-off, U - NC
Output + Transport Services	Output_Heat_PH_IND_CoalProducts	kWh/a	heat production, at hard coal industrial furnace 1-10MW | heat, district or industrial, other than natural gas | cut-off, U - NC
Output + Transport Services	Output_Heat_PH_IND_HeatPump	kWh/a	heat production, at heat pump 30kW, allocation exergy | heat, central or small-scale, other than natural gas | cut-off, U - NC - NF	heat, air heat pump 10 kW - NC - NF	heat, horizontal ground-source heat pump 10 kW - NC - NF	heat, vertical ground-source heat pump 10 kW - NC - NF	Share_PH_IND_HP1	Share_PH_IND_HP2	Share_PH_IND_HP3	Share_PH_IND_HP4
Output + Transport Services	Output_Heat_PH_IND_H2	kWh/a	heat production, natural gas, at industrial furnace >100kW | heat, district or industrial, natural gas | cut-off, U - NC - NF - DEF
Output + Transport Services	Output_CONV_H2_SteamReforming	kWh/a
Output + Transport Services	Output_CONV_H2_Electrolysis	kWh/a	Betrieb Elektrolyse - NC - NF
Output + Transport Services	Output_CONV_CH4_Methanation	kWh/a	Synthetic Natural Gas (based on DAC) - NC - NF
Output + Transport Services	Output_CONV_H2_FeedIn	kWh/a
Output + Transport Services	Output_CONV_PtL	kWh/a	Synthetic Fuels - FT-PtL (Fischer-Tropsch Power-to-Liquid) MEA (amine-based shrubbing) - NC - NF	Synthetic Fuels - FT-PtL (Fischer-Tropsch Power-to-Liquid) Selexol - NC - NF			Share_CONV_PtL1	Share_CONV_PtL2
Output + Transport Services	Output_CONV_PBtL	kWh/a	Vergaser (CHOREN Carbo-V®) 500 MW, BtL, Waldrestholz (Fichte), ab Anlage - NC	Synthetic Fuels - FT-PBtL (Fischer-Tropsch Power-and-Biomass-to-Liquid) - NC - NF			Share_CONV_BtL1	Share_CONV_BtL2
Output + Transport Services	Output_CONV_Biogas	kWh/a	Fermenter, Nachgärer, abgedecktes Gärrestelager [100 kWel Mais (90), Rindergülle (10)], Biogas ab Anlage - NC	Fermenter, Nachgärer, abgedecktes Gärrestelager [250 kWel Mais (60), Gras (30), Rindergülle (10)], Biogas ab Anlage - NC	Fermenter, Nachgärer, abgedecktes Gärrestelager [500 kWel Mais (90), Rindergülle (10)], Biogas ab Anlage (JB) - NC		Share_CONV_Biogas1	Share_CONV_Biogas2	Share_CONV_Biogas3
Output + Transport Services	Output_CONV_Biogas2Grid	kWh/a	Fermenter, Nachgärer, abgedecktes Gärrestelager [100 kWel Mais (90), Rindergülle (10)], Biogas ab Anlage - NC	Fermenter, Nachgärer, abgedecktes Gärrestelager [250 kWel Mais (60), Gras (30), Rindergülle (10)], Biogas ab Anlage - NC	Fermenter, Nachgärer, abgedecktes Gärrestelager [500 kWel Mais (90), Rindergülle (10)], Biogas ab Anlage (JB) - NC		Share_CONV_Biogas2Grid1	Share_CONV_Biogas2Grid2	Share_CONV_Biogas2Grid3
Output + Transport Services	Output_CONV_Biodiesel	kWh/a	esterification of rape oil | vegetable oil methyl ester | cut-off, U - ORG	esterification of palm oil | vegetable oil methyl ester | cut-off, U - ORG	esterification of soybean oil | vegetable oil methyl ester | cut-off, U - ORG	Rapsmethylester Produktion (Umesterung von Rapsöl (raffiniert)), ab Produktionsanlage - ORG	Share_CONV_Biodiesel1	Share_CONV_Biodiesel2	Share_CONV_Biodiesel3	Share_CONV_Biodiesel4
Output + Transport Services	Output_CONV_Pellets	kWh/a	Waldrestholz Hackschnitzel (Fichte, Wassergehalt 35%) Transport, frei Anlage - ORG	market for wood pellet | wood pellet, measured as dry mass | cut-off, U - ORG	Pelletauslieferung, A1 Holzpellets (9% Wassergehalt), frei Haus - ORG	market for wood chips, wet, measured as dry mass | wood chips, wet, measured as dry mass | cut-off, U - ORG	Share_CONV_Pellets1	Share_CONV_Pellets2	Share_CONV_Pellets3	Share_CONV_Pellets4
Output + Transport Services	Output_CONV_Bioethanol	kWh/a	ethanol production from grass | ethanol, without water, in 95% solution state, from fermentation | cut-off, U - ORG	Bioethanol Produktion aus Winterweizen (Wassergehalt 17%), ab Anlage - ORG			Share_CONV_Bioethanol1	Share_CONV_Bioethanol2
Output + Transport Services	Output_CONV_BtL	kWh/a	Vergaser (CHOREN Carbo-V®) 500 MW, BtL, Waldrestholz (Fichte), ab Anlage - NC
Output + Transport Services	Output_CONV_Bioliq_Fuels	kWh/a
Output + Transport Services	Output_CONV_Bioliq_Gas	kWh/a
Output + Transport Services	Output_CONV_Bioliq_DistrictHeat	kWh/a
Output + Transport Services	Output_CONV_Bioliq_Electricity	kWh/a
Output + Transport Services	Output_CONV_PtL_Imp	kWh/a	Synthetic Fuels - FT-PtL (Fischer-Tropsch Power-to-Liquid) MEA (amine-based shrubbing) - NC - NF	Synthetic Fuels - FT-PtL (Fischer-Tropsch Power-to-Liquid) Selexol - NC - NF			Share_CONV_PtL_IMP1	Share_CONV_PtL_IMP2
Output + Transport Services	Output_CONV_Methanation_Imp	kWh/a	Synthetic Natural Gas (based on DAC) - NC - NF
Output + Transport Services	Output_CONV_H2prod_Electrolyis_Imp	kWh/a	Betrieb Elektrolyse - NC - NF
Output + Transport Services	Output_PP_Wind_offshore_ImpSF	kWh/a	electricity production, wind, 1-3MW turbine, offshore | electricity, high voltage | cut-off, U - NC
Output + Transport Services	Output_PP_Wind_onshore_ImpSF	kWh/a	electricity production, wind, >3MW turbine, onshore | electricity, high voltage | cut-off, U - NC
Output + Transport Services	Output_PP_PV_power_station_ImpSF	kWh/a	electricity production, photovoltaic, 570kWp open ground installation, multi-Si | electricity, low voltage | cut-off, U - NC	electricity production, photovoltaic, 570kWp open ground installation, multi-Si | electricity, low voltage | cut-off, U - NC	electricity production, photovoltaic, 570kWp open ground installation, multi-Si | electricity, low voltage | cut-off, U - NC		Share_PP_PV_power_station1	Share_PP_PV_power_station2	Share_PP_PV_power_station3
Output + Transport Services	Output_PP_CSP_ImpSF	kWh/a	Electricity production at 20 MW solar tower power plant (v3.5) - NC	Electricity production for 50 MW parabolic trough power plant (v3.5) - NC			Share_PP_ImpSF_CSP1	Share_PP_ImpSF_CSP2
Output + Transport Services	Output_PP_Wind_onshore_Imp	kWh/a	electricity production, wind, >3MW turbine, onshore | electricity, high voltage | cut-off, U - NC
Output + Transport Services	Output_PP_Wind_offshore_Imp	kWh/a	electricity production, wind, 1-3MW turbine, offshore | electricity, high voltage | cut-off, U - NC
Output + Transport Services	Output_PP_PV_power_station_Imp	kWh/a	electricity production, photovoltaic, 570kWp open ground installation, multi-Si | electricity, low voltage | cut-off, U - NC	electricity production, photovoltaic, 570kWp open ground installation, multi-Si | electricity, low voltage | cut-off, U - NC	electricity production, photovoltaic, 570kWp open ground installation, multi-Si | electricity, low voltage | cut-off, U - NC		Share_PP_PV_power_station1	Share_PP_PV_power_station2	Share_PP_PV_power_station3
Output + Transport Services	Output_PP_CSP_Imp	kWh/a	Electricity production at 20 MW solar tower power plant (v3.5) - NC	Electricity production for 50 MW parabolic trough power plant (v3.5) - NC			Share_PP_Imp_CSP1	Share_PP_Imp_CSP2
Output + Transport Services	TransportServices_LDV_Otto	tkm/a	transport, freight, lorry 3.5-7.5 metric ton, EURO6 | transport, freight, lorry 3.5-7.5 metric ton, EURO6 | cut-off, U - NC	transport, freight, lorry 3.5-7.5 metric ton, EURO6 | transport, freight, lorry 3.5-7.5 metric ton, EURO6 | cut-off, U - NC - NF			Share_FOS_in_LDV_Otto	Share_BIO_in_LDV_Otto
Output + Transport Services	TransportServices_LDV_Diesel	tkm/a	transport, freight, lorry 3.5-7.5 metric ton, EURO6 | transport, freight, lorry 3.5-7.5 metric ton, EURO6 | cut-off, U - NC	transport, freight, lorry 3.5-7.5 metric ton, EURO6 | transport, freight, lorry 3.5-7.5 metric ton, EURO6 | cut-off, U - NC - NF			Share_FOS_in_LDV_Diesel	Share_BIO_in_LDV_Diesel
Output + Transport Services	TransportServices_LDV_Electric	tkm/a	no LCI, however, impacts are assumed to be negligible
Output + Transport Services	TransportServices_LDV_Gas	tkm/a					Share_FOS_in_LDV_Gas	Share_BIO+EE-CH4_in_LDV_Gas	Share_H2_in_LDV_Gas
Output + Transport Services	TransportServices_LDV_Hybrid	tkm/a	transport, freight, lorry 3.5-7.5 metric ton, EURO6 | transport, freight, lorry 3.5-7.5 metric ton, EURO6 | cut-off, U - NC	transport, freight, lorry 3.5-7.5 metric ton, EURO6 | transport, freight, lorry 3.5-7.5 metric ton, EURO6 | cut-off, U - NC - NF	no LCI, however, impacts are assumed to be negligible		Share_FOS_in_LDV_Otto_PHEV	Share_BIO_in_LDV_Otto_PHEV	Share_EL_in_LDV_Otto_PHEV
Output + Transport Services	TransportServices_LDV_H2FuelCell	tkm/a
Output + Transport Services	TransportServices_HDV_Diesel	tkm/a	transport, freight, lorry 16-32 metric ton, EURO6 | transport, freight, lorry 16-32 metric ton, EURO6 | cut-off, U - NC	transport, freight, lorry 16-32 metric ton, EURO6 | transport, freight, lorry 16-32 metric ton, EURO6 | cut-off, U - NC - NF			Share_FOS_in_HDV_Diesel	Share_BIO+SYN_in_HDV_Diesel
Output + Transport Services	TransportServices_HDV_Hybrid	tkm/a	transport, freight, lorry 16-32 metric ton, EURO6 | transport, freight, lorry 16-32 metric ton, EURO6 | cut-off, U - NC	transport, freight, lorry 16-32 metric ton, EURO6 | transport, freight, lorry 16-32 metric ton, EURO6 | cut-off, U - NC - NF	no LCI, however, impacts are assumed to be negligible		Share_FOS_in_HDV_Diesel_PHEV	Share_BIO+SYN_in_HDV_Diesel_PHEV	Share_EL_in_HDV_Diesel_PHEV
Output + Transport Services	TransportServices_HDV_H2FuelCell	tkm/a
Output + Transport Services	TransportServices_HDV_Gas	tkm/a					Share_FOS_in_HDV_Gas	Share_BIO+EE-CH4_in_HDV_Gas	Share_H2_in_HDV_Gas
Output + Transport Services	TransportServices_PC_Otto	pkm/a	transport, passenger car, medium size, petrol, EURO 5 | transport, passenger car, medium size, petrol, EURO 5 | cut-off, U - NC	transport, passenger car, medium size, petrol, EURO 5 | transport, passenger car, medium size, petrol, EURO 5 | cut-off, U - NC - NF			Share_FOS_in_PC_Otto	Share_BIO_in_PC_Otto
Output + Transport Services	TransportServices_PC_Otto_PHEV	pkm/a	transport, passenger car, medium size, petrol, EURO 5 | transport, passenger car, medium size, petrol, EURO 5 | cut-off, U - NC	transport, passenger car, medium size, petrol, EURO 5 | transport, passenger car, medium size, petrol, EURO 5 | cut-off, U - NC - NF	transport, passenger car, medium size, petrol, EURO 5 | transport, passenger car, medium size, petrol, EURO 5 | cut-off, U - NC - NF - DEF		Share_FOS_in_PC_Otto_PHEV	Share_BIO_in_PC_Otto_PHEV	Share_EL_in_PC_Otto_PHEV
Output + Transport Services	TransportServices_PC_Diesel	pkm/a	transport, passenger car, medium size, diesel, EURO 5 | transport, passenger car, medium size, diesel, EURO 5 | cut-off, U - NC	transport, passenger car, medium size, diesel, EURO 5 | transport, passenger car, medium size, diesel, EURO 5 | cut-off, U - NC - NF			Share_FOS_in_PC_Diesel	Share_BIO_in_PC_Diesel
Output + Transport Services	TransportServices_PC_Diesel_PHEV	pkm/a	transport, passenger car, medium size, diesel, EURO 5 | transport, passenger car, medium size, diesel, EURO 5 | cut-off, U - NC	transport, passenger car, medium size, diesel, EURO 5 | transport, passenger car, medium size, diesel, EURO 5 | cut-off, U - NC - NF	transport, passenger car, medium size, diesel, EURO 5 | transport, passenger car, medium size, diesel, EURO 5 | cut-off, U - NC - NF - DEF		Share_FOS_in_PC_Diesel_PHEV	Share_BIO_in_PC_Diesel_PHEV	Share_EL_in_PC_Diesel_PHEV
Output + Transport Services	TransportServices_PC_Gas	pkm/a	transport, passenger car, medium size, natural gas, EURO 5 | transport, passenger car, medium size, natural gas, EURO 5 | cut-off, U - NC	transport, passenger car, medium size, natural gas, EURO 5 | transport, passenger car, medium size, natural gas, EURO 5 | cut-off, U - NC - NF	transport, passenger car, medium size, natural gas, EURO 5 | transport, passenger car, medium size, natural gas, EURO 5 | cut-off, U - NC - NF - DEF		Share_FOS_in_PC_Gas	Share_BIO+EE-CH4_in_PC_Gas	Share_H2_in_PC_Gas
Output + Transport Services	TransportServices_PC_H2FuelCell	pkm/a	Fuel Cell Electric Vehicle (FCEV) (current) - NC - NF
Output + Transport Services	TransportServices_PC_BEV	pkm/a	transport, passenger car, electric | transport, passenger car, electric | cut-off, U - NC - NF
Output + Transport Services	TransportServices_RAIL_Pass_Electric	pkm/a	transport, passenger train, high-speed | transport, passenger train | cut-off, U - NC - NF	transport, passenger train, regional | transport, passenger train | cut-off, U - NC - NF	transport, passenger train, urban | transport, passenger train | cut-off, U - NC - NF	transport, tram | transport, tram | cut-off, U - NC - NF	Share_HIGHSPEED_in_TrP_Electric	Share_REGIONAL_in_TrP_Electric	Share_URBAN_in_TrP_Electric	Share_TRAM_in_TrP_Electric
Output + Transport Services	TransportServices_RAIL_Pass_Diesel	pkm/a					Share_FOS_in_TrP_Diesel	Share_BIO_in_TrP_Diesel
Output + Transport Services	TransportServices_RAIL_Pass_H2FuelCell	pkm/a
Output + Transport Services	TransportServices_RAIL_Freight_Electric	tkm/a	transport, freight train, electricity | transport, freight train | cut-off, U - NC - NF
Output + Transport Services	TransportServices_RAIL_Freight_Diesel	tkm/a	transport, freight train, diesel | transport, freight train | cut-off, U - NC	transport, freight train, diesel | transport, freight train | cut-off, U - NC - NF			Share_FOS_in_TrG_Diesel	Share_BIO_in_TrG_Diesel
Output + Transport Services	TransportServices_RAIL_Freight_H2FuelCell	tkm/a
Output + Transport Services	TransportServices_NAV_DieselInland	tkm/a	transport, freight, inland waterways, barge | transport, freight, inland waterways, barge | cut-off, U - NC	transport, freight, inland waterways, barge | transport, freight, inland waterways, barge | cut-off, U - NC - NF			Share_FOS_in_NavIn	Share_BIO+SYN_in_NavIn
Output + Transport Services	TransportServices_NAV_GasInland	tkm/a	transport, freight, sea, liquefied natural gas | transport, freight, sea, liquefied natural gas | cut-off, U - NC	transport, freight, sea, liquefied natural gas | transport, freight, sea, liquefied natural gas | cut-off, U - NC - NF	transport, freight, sea, liquefied natural gas | transport, freight, sea, liquefied natural gas | cut-off, U - NC - NF - DEF		Share_FOS_in_GasNet	Share_BIO+EE-CH4_in_GasNet	Share_H2_in_GasNet
Output + Transport Services	TransportServices_NAV_DieselMarine	tkm/a	transport, freight, inland waterways, barge | transport, freight, inland waterways, barge | cut-off, U - NC	transport, freight, inland waterways, barge | transport, freight, inland waterways, barge | cut-off, U - NC - NF			Share_FOS_in_NavC	Share_BIO+SYN_in_NavC
Output + Transport Services	TransportServices_AVI_Pass	pkm/a	transport, passenger, aircraft, intracontinental | transport, passenger, aircraft | cut-off, U - NC	transport, passenger, aircraft, intracontinental | transport, passenger, aircraft | cut-off, U - NC - NF			Share_FOS_in_AviP	Share_BIO+SYN_in_AviP
Output + Transport Services	TransportServices_AVI_Freight	tkm/a	transport, freight, aircraft, intracontinental | transport, freight, aircraft | cut-off, U - NC	transport, freight, aircraft, intracontinental | transport, freight, aircraft | cut-off, U - NC - NF			Share_FOS_in_AviG	Share_BIO+SYN_in_AviG
Output + Transport Services	TransportServices_PRT_Diesel	pkm/a	transport, regular bus | transport, regular bus | cut-off, U - NC	transport, regular bus | transport, regular bus | cut-off, U - NC - NF - DEF			Share_FOS_in_BUS_Diesel	Share_BIO_in_BUS_Diesel
Output + Transport Services	TransportServices_PRT_Diesel_PHEV	pkm/a	transport, regular bus | transport, regular bus | cut-off, U - NC	no LCI, however, impacts are assumed to be negligible			Share_FOS_in_BUS_Diesel_PHEV	Share_BIO_in_BUS_Diesel_PHEV	Share_EL_in_BUS_Diesel_PHEV
Output + Transport Services	TransportServices_PRT_Electric	pkm/a	no LCI, however, impacts are assumed to be negligible
Output + Transport Services	TransportServices_PRT_Gas	pkm/a					Share_FOS_in_BUS_Gas	Share_BIO+EE-CH4_in_BUS_Gas	Share_H2_in_BUS_Gas
Output + Transport Services	TransportServices_PRT_H2FuelCell	pkm/a
Output + Transport Services	TransportServices_MC_Otto	pkm/a	transport, passenger, motor scooter | transport, passenger, motor scooter | cut-off, U - NC	transport, passenger, motor scooter | transport, passenger, motor scooter | cut-off, U - NC - NF			Share_FOS_in_MC_Otto	Share_BIO_in_MC_Otto
Output + Transport Services	TransportServices_MC_Electric	pkm/a	no LCI, however, impacts are assumed to be negligible
Output + Transport Services	TransportServices_MC_H2FuelCell	pkm/a

## Sheet: S4_Background electricity mixes
				Shares 2°C background scenario					Shares 5°C background scenario
	Scenario region	Electricity market composition	Assigned markets in ecoinvent	2015	2020	2030	2040	2050	2015	2020	2030	2040	2050
	Africa	electricity production CSP mix, electricity high voltage, cut-off, U - GLO	ZA, TZ	1.28062e-05	0.00156491	0.00156491	0.0879088	0.160778	1.28062e-05	0.00249144	0.00649375	0.0168216	0.0296902
		electricity production, deep geothermal | electricity, high voltage | cut-off, U - RoW		0.00573719	0.040851	0.040851	0.0454558	0.0533625	0.00573719	0.00802561	0.0138339	0.0238861	0.0367045
		electricity production, hard coal | electricity, high voltage | cut-off, U - ZA		0.330375	0.119649	0.119649	0	0	0.330375	0.293788	0.24462	0.202179	0.190826
		electricity production, hydro, pumped storage | electricity, high voltage | cut-off, U - ZA		0.0712446	0.0594723	0.0594723	0.0273411	0.0177071	0.0712446	0.0777835	0.0843949	0.0827618	0.0861825
		electricity production, hydro, reservoir, non-alpine region | electricity, high voltage | cut-off, U - TZ		0.0402094	0.0335653	0.0335653	0.0154309	0.0099936	0.0402094	0.0438998	0.0476312	0.0467095	0.0486401
		electricity production, hydro, reservoir, non-alpine region | electricity, high voltage | cut-off, U - ZA		0.0428866	0.0358001	0.0358001	0.0164583	0.010659	0.0428866	0.0468228	0.0508026	0.0498195	0.0518787
		electricity production, hydrogen, combined cycle power plant | electricity, high voltage | cut-off, U - RoW		0	0	0	0.0133971	0.0170487	0	0	0	0	0
		electricity production, lignite | electricity, high voltage | cut-off, U		0.000281737	0	0	0	0	0.000281737	0.000212037	0	0	0
		electricity production, natural gas, conventional power plant | electricity, high voltage | cut-off, U - TZ		0.36499	0.237501	0.237501	0.0401857	0	0.36499	0.365065	0.379603	0.401549	0.362906
		electricity production, nuclear, pressure water reactor | electricity, high voltage | cut-off, U - ZA		0.0156748	0.00769255	0.00769255	0	0	0.0156748	0.0141111	0.0200954	0.0218858	0.0247684
		electricity production, oil | electricity, high voltage | cut-off, U - TZ		0.0967362	0.0134732	0.0134732	0.00236236	0	0.0967362	0.088867	0.0572969	0.0370766	0.0263456
		electricity production, oil | electricity, high voltage | cut-off, U - ZA		0.0160739	0.00223873	0.00223873	0.000392535	0	0.0160739	0.0147663	0.00952057	0.00616071	0.00437763
		electricity production, photovoltaic, 3kWp slanted-roof installation, multi-Si, panel, mounted | electricity, low voltage | cut-off, U - TZ		0.000207578	0.0108182	0.0108182	0.0209018	0.02	0.000207578	0.0011924	0.00263928	0.00352444	0.00462056
		electricity production, photovoltaic, 3kWp slanted-roof installation, multi-Si, panel, mounted | electricity, low voltage | cut-off, U - ZA		0.000709113	0.0369563	0.0369563	0.071403	0.0683225	0.000709113	0.00407338	0.00901612	0.0120399	0.0157844
		electricity production, photovoltaic, 3kWp slanted-roof installation, single-Si, panel, mounted | electricity, low voltage | cut-off, U - TZ		0.000170546	0.0088882	0.0088882	0.0171728	0.0164319	0.000170546	0.00097967	0.00216843	0.00289567	0.00379624
		electricity production, photovoltaic, 3kWp slanted-roof installation, single-Si, panel, mounted | electricity, low voltage | cut-off, U - ZA		0.000583976	0.0304346	0.0304346	0.0588025	0.0562656	0.000583976	0.00335455	0.00742504	0.00991523	0.0129989
		electricity production, photovoltaic, 570kWp open ground installation, multi-Si | electricity, low voltage | cut-off, U - RoW		0.00167121	0.0870974	0.0870974	0.16828	0.16102	0.00167121	0.00959999	0.0212489	0.0283753	0.0372001
		electricity production, wind, >3MW turbine, onshore | electricity, high voltage | cut-off, U - ZA		0.000653526	0.0134913	0.0134913	0.019157	0.0202301	0.000653526	0.00126145	0.00183783	0.00191293	0.00203093
		electricity production, wind, 1-3MW turbine, offshore | electricity, high voltage | cut-off, U - RoW		0	0.0238632	0.0238632	0.096639	0.0842736	0	0	0.000374495	0.00127243	0.00303814
		electricity production, wind, 1-3MW turbine, onshore | electricity, high voltage | cut-off, U - ZA		0.00896395	0.185051	0.185051	0.262763	0.277482	0.00896395	0.0173024	0.0252082	0.0262384	0.0278568
		heat and power co-generation, hard coal | electricity, high voltage | cut-off, U - RoW		0	0	0	0	0	0	0.000349862	0.00118341	0.00291133	0.00388122
		heat and power co-generation, hydrogen, combined cycle power plant, 400MW electrical | electricity, high voltage | cut-off, U - RoW		0	0	0	0.000380176	0	0	0	0	0	0
		heat and power co-generation, natural gas, conventional power plant, 100MW electrical | electricity, high voltage | cut-off, U - RoW		0.000371381	0.00760456	0.00760456	0.00113502	0	0.000371381	0.000466482	0.00171519	0.00487596	0.00404073
		heat and power co-generation, wood chips, 6667 kW | electricity, high voltage | cut-off, U - ZA		0.00244599	0.0439933	0.0439933	0.0344362	0.0264255	0.00243318	0.00555538	0.0128452	0.0170811	0.0223265
	China	electricity production CSP mix, electricity high voltage, cut-off, U - GLO	CN-GD, CN-GX, CN-GZ, CN-HA, CN-YN, CN-ZJ, CN-AH, CN-BJ, CN-CQ, CN-FJ, CN-GS, CN-HB, CN-HE, CN-HL, CN-HN, CN-HU, CN-JL, CN-JS, CN-JX, CN-LN, CN-NM, CN-NX, CN-QH, CN-SA, CN-SC, CN-SD, CN-SH, CN-SX, CN-TJ, CN-XJ, CN-XZ, CN-ZJ	5.09937e-06	0.000721645	0.0453973	0.167327	0.208014	5.09937e-06	0.000721676	0.00159121	0.00222068	0.00320077
		electricity production, deep geothermal | electricity, high voltage | cut-off, U - RoW		2.03975e-05	7.93951e-05	0.00574587	0.0215517	0.0351008	2.03975e-05	7.93985e-05	0.000247003	0.000659236	0.00142489
		electricity production, hard coal | electricity, high voltage | cut-off, U - CN-JS		0.186317	0.169608	0.0869183	0.0152841	0	0.186317	0.172701	0.16255	0.163779	0.14711
		electricity production, hard coal | electricity, high voltage | cut-off, U - CN-NM		0.140125	0.127558	0.0653693	0.0114948	0	0.140125	0.129884	0.12225	0.123174	0.110638
		electricity production, hard coal | electricity, high voltage | cut-off, U - CN-SD		0.15153	0.137941	0.07069	0.0124305	0	0.15153	0.140456	0.1322	0.1332	0.119644
		electricity production, hydro, pumped storage | electricity, high voltage | cut-off, U - CN-GD		0.00112121	0.000988093	0.000854752	0.000705184	0.000629282	0.00112121	0.000988135	0.000829974	0.000757093	0.000769455
		electricity production, hydro, pumped storage | electricity, high voltage | cut-off, U - CN-HE		0.000292993	0.000258207	0.000223363	0.000184278	0.000164443	0.000292993	0.000258218	0.000216888	0.000197842	0.000201073
		electricity production, hydro, pumped storage | electricity, high voltage | cut-off, U - CN-ZJ		0.000706631	0.000622735	0.000538698	0.000444434	0.000396598	0.000706631	0.000622761	0.000523082	0.000477149	0.00048494
		electricity production, hydro, run-of-river | electricity, high voltage | cut-off, U - CN-HU		0.0618905	0.0545424	0.0471821	0.038926	0.0347362	0.0618905	0.0545448	0.0458144	0.0417913	0.0424737
		electricity production, hydro, run-of-river | electricity, high voltage | cut-off, U - CN-SC		0.0695945	0.0613318	0.0530552	0.0437714	0.0390601	0.0695945	0.0613344	0.0515172	0.0469934	0.0477607
		electricity production, hydro, run-of-river | electricity, high voltage | cut-off, U - CN-YN		0.0558306	0.049202	0.0425623	0.0351146	0.0313351	0.0558306	0.0492041	0.0413285	0.0376994	0.038315
		electricity production, hydrogen, combined cycle power plant | electricity, high voltage | cut-off, U - RoW		0	0	0	0.0012756	0.011041	0	0	0	0	0
		electricity production, natural gas, combined cycle power plant | electricity, high voltage | cut-off, U - CN-JS		0.00732668	0.00695269	0.00513164	0.00355846	0	0.00732668	0.00913338	0.0146717	0.0164954	0.0171213
		electricity production, natural gas, combined cycle power plant | electricity, high voltage | cut-off, U - CN-NM		0.00549501	0.00521452	0.00384873	0.00266884	0	0.00549501	0.00685003	0.0110038	0.0123715	0.012841
		electricity production, natural gas, combined cycle power plant | electricity, high voltage | cut-off, U - CN-SD		0.00595293	0.00564906	0.00416946	0.00289125	0	0.00595293	0.00742087	0.0119207	0.0134025	0.0139111
		electricity production, natural gas, conventional power plant | electricity, high voltage | cut-off, U - CN-AH		0.00359289	0.00340949	0.00251648	0.00174501	0	0.00359289	0.00447887	0.00719477	0.00808909	0.00839602
		electricity production, natural gas, conventional power plant | electricity, high voltage | cut-off, U - CN-JS		0.000704488	0.000668528	0.000493427	0.000342159	0	0.000704488	0.00087821	0.00141074	0.0015861	0.00164628
		electricity production, natural gas, conventional power plant | electricity, high voltage | cut-off, U - CN-SD		0.000563591	0.000534823	0.000394741	0.000273727	0	0.000563591	0.000702568	0.00112859	0.00126888	0.00131702
		electricity production, nuclear, pressure water reactor | electricity, high voltage | cut-off, U - CN-GD		0.0154814	0.0296393	0.0244545	0.00716566	0	0.0154814	0.0296405	0.0443324	0.047551	0.0542477
		electricity production, nuclear, pressure water reactor | electricity, high voltage | cut-off, U - CN-JS		0.00528814	0.0101242	0.00835317	0.00244764	0	0.00528814	0.0101246	0.0151431	0.0162425	0.0185299
		electricity production, nuclear, pressure water reactor | electricity, high voltage | cut-off, U - CN-ZJ		0.00826114	0.015816	0.0130493	0.00382371	0	0.00826114	0.0158167	0.0236565	0.025374	0.0289475
		electricity production, oil | electricity, high voltage | cut-off, U - CN-JS		0.000642521	0.000413205	0.000136638	0	0	0.000642521	0.000434942	0.000247657	0.000111395	5.14872e-05
		electricity production, oil | electricity, high voltage | cut-off, U - CN-NM		0.000499738	0.000321381	0.000106274	0	0	0.000499738	0.000338288	0.000192622	8.66406e-05	4.00456e-05
		electricity production, oil | electricity, high voltage | cut-off, U - CN-SD		0.000535434	0.000344337	0.000113865	0	0	0.000535434	0.000362452	0.000206381	9.28293e-05	4.2906e-05
		electricity production, photovoltaic, 3kWp slanted-roof installation, multi-Si, panel, mounted | electricity, low voltage | cut-off, U - CN-JS		0.000338709	0.0016704	0.00618642	0.00948966	0.0116332	0.000338709	0.00122111	0.00205291	0.00234226	0.00292755
		electricity production, photovoltaic, 3kWp slanted-roof installation, multi-Si, panel, mounted | electricity, low voltage | cut-off, U - CN-NX		0.000629031	0.00310217	0.0114891	0.0176236	0.0216045	0.000629031	0.00226777	0.00381255	0.00434992	0.00543687
		electricity production, photovoltaic, 3kWp slanted-roof installation, multi-Si, panel, mounted | electricity, low voltage | cut-off, U - CN-QH		0.00112903	0.005568	0.0206214	0.0316322	0.0387773	0.00112903	0.00407035	0.00684303	0.00780754	0.00975849
		electricity production, photovoltaic, 3kWp slanted-roof installation, single-Si, panel, mounted | electricity, low voltage | cut-off, U - CN-JS		0.000282257	0.001392	0.00515533	0.00790802	0.00969431	0.000282257	0.00101759	0.00171075	0.00195188	0.00243962
		electricity production, photovoltaic, 3kWp slanted-roof installation, single-Si, panel, mounted | electricity, low voltage | cut-off, U - CN-NX		0.000524192	0.00258514	0.00957421	0.0146864	0.0180038	0.000524192	0.00188981	0.00317712	0.00362493	0.00453073
		electricity production, photovoltaic, 3kWp slanted-roof installation, single-Si, panel, mounted | electricity, low voltage | cut-off, U - CN-QH		0.000940857	0.00464	0.0171845	0.0263601	0.0323144	0.000940857	0.00339196	0.00570252	0.00650628	0.00813207
		electricity production, photovoltaic, 570kWp open ground installation, multi-Si | electricity, low voltage | cut-off, U - CN-JS		0.000621836	0.00306669	0.0113576	0.0174221	0.0213574	0.000621836	0.00224183	0.00376894	0.00430016	0.00537469
		electricity production, photovoltaic, 570kWp open ground installation, multi-Si | electricity, low voltage | cut-off, U - CN-NX		0.00113061	0.0055758	0.0206502	0.0316765	0.0388316	0.00113061	0.00407605	0.00685261	0.00781847	0.00977215
		electricity production, photovoltaic, 570kWp open ground installation, multi-Si | electricity, low voltage | cut-off, U - CN-QH		0.00209163	0.0103152	0.038203	0.0586014	0.0718385	0.00209163	0.0075407	0.0126773	0.0144642	0.0180785
		electricity production, wind, <1MW turbine, onshore | electricity, high voltage | cut-off, U - CN-GS		0.000914877	0.00155778	0.00336908	0.00485801	0.00553948	0.000914877	0.00150587	0.00198958	0.00223731	0.00264849
		electricity production, wind, <1MW turbine, onshore | electricity, high voltage | cut-off, U - CN-HB		0.00121221	0.00206406	0.00446404	0.00643687	0.00733981	0.00121221	0.00199527	0.00263619	0.00296444	0.00350924
		electricity production, wind, <1MW turbine, onshore | electricity, high voltage | cut-off, U - CN-NM		0.00272176	0.00463441	0.010023	0.0144526	0.0164799	0.00272176	0.00447995	0.00591899	0.006656	0.00787924
		electricity production, wind, >3MW turbine, onshore | electricity, high voltage | cut-off, U - CN-GS		0.00224145	0.00381657	0.00825426	0.0119021	0.0135717	0.00224145	0.00368937	0.00487446	0.00548141	0.00648879
		electricity production, wind, >3MW turbine, onshore | electricity, high voltage | cut-off, U - CN-HB		0.0030191	0.00514069	0.011118	0.0160314	0.0182803	0.0030191	0.00496936	0.0065656	0.00738312	0.00874
		electricity production, wind, >3MW turbine, onshore | electricity, high voltage | cut-off, U - CN-NM		0.00681584	0.0116055	0.0250997	0.0361922	0.0412691	0.00681584	0.0112187	0.0148223	0.016668	0.0197312
		electricity production, wind, 1-3MW turbine, offshore | electricity, high voltage | cut-off, U - CN-JS		0.000180992	0.000887628	0.0142088	0.0388915	0.0401462	0.000180992	0.00078207	0.00285465	0.00455429	0.00579557
		electricity production, wind, 1-3MW turbine, offshore | electricity, high voltage | cut-off, U - CN-SD		4.60376e-05	0.00022578	0.00361419	0.00989256	0.0102117	4.60376e-05	0.00019893	0.000726118	0.00115844	0.00147418
		electricity production, wind, 1-3MW turbine, offshore | electricity, high voltage | cut-off, U - CN-SH		8.4032e-05	0.000412113	0.00659695	0.0180568	0.0186393	8.4032e-05	0.000363104	0.00132537	0.00211449	0.0026908
		electricity production, wind, 1-3MW turbine, onshore | electricity, high voltage | cut-off, U - CN-GS		0.00267602	0.00455652	0.00985457	0.0142097	0.016203	0.00267602	0.00440466	0.00581951	0.00654413	0.00774682
		electricity production, wind, 1-3MW turbine, onshore | electricity, high voltage | cut-off, U - CN-HB		0.00359089	0.0061143	0.0132237	0.0190677	0.0217424	0.00359089	0.00591053	0.00780909	0.00878144	0.0103953
		electricity production, wind, 1-3MW turbine, onshore | electricity, high voltage | cut-off, U - CN-NM		0.00807379	0.0137474	0.0297322	0.042872	0.0488859	0.00807379	0.0132893	0.017558	0.0197443	0.0233729
		heat and power co-generation, biogas, gas engine | electricity, high voltage | cut-off, U - RoW		0.000271467	0.000506243	0.00194248	0.00224931	0.00213517	0.000271467	0.000463379	0.000591571	0.000651703	0.000755672
		heat and power co-generation, hard coal | electricity, high voltage | cut-off, U - RoW		0.213574	0.184103	0.122618	0.0455588	0	0.213574	0.188254	0.148339	0.122128	0.109606
		heat and power co-generation, hydrogen, combined cycle power plant, 400MW electrical | electricity, high voltage | cut-off, U - RoW		0	0	0	0.00583866	0.046568	0	0	0	0	0
		heat and power co-generation, natural gas, conventional power plant, 100MW electrical | electricity, high voltage | cut-off, U - RoW		0.0164081	0.0245402	0.0518766	0.0525488	0	0.0164081	0.0189252	0.0224296	0.025253	0.0293729
		heat and power co-generation, wood chips, 6667 kW | electricity, high voltage | cut-off, U - RoW		0.00870342	0.0162305	0.0622774	0.0721144	0.0684551	0.00870342	0.0148563	0.0189662	0.0208941	0.0242274
	Eurasia	electricity production CSP mix, electricity high voltage, cut-off, U - GLO	BA, BG, CY, HR, LT, LV, MK, MT, RO, RS, RU, SI, UA	0	0	0.00212273	0.0190337	0.0265839	0	0	0	0	0
		electricity production, deep geothermal | electricity, high voltage | cut-off, U - RU		0.000265649	0.00159279	0.0223735	0.0474592	0.0652177	0.000265649	0.00158814	0.00473461	0.00756398	0.0112762
		electricity production, hard coal | electricity, high voltage | cut-off, U - BG		0.000986581	0.00103905	2.83325e-05	0	0	0.000986581	0.00126725	0.000807363	0.00115227	0.00116007
		electricity production, hard coal | electricity, high voltage | cut-off, U - UA		0.0281366	0.0296331	0.000808022	0	0	0.0281366	0.036141	0.0230254	0.032862	0.0330843
		electricity production, hydro, pumped storage | electricity, high voltage | cut-off, U - BG		0.000977643	0.00102275	0.000894476	0.000637756	0.000478715	0.000977643	0.00101976	0.00102476	0.00101409	0.00100808
		electricity production, hydro, pumped storage | electricity, high voltage | cut-off, U - RU		0.001169	0.00122294	0.00106956	0.000762588	0.000572418	0.001169	0.00121937	0.00122535	0.00121258	0.0012054
		electricity production, hydro, pumped storage | electricity, high voltage | cut-off, U - UA		0.000660598	0.000691078	0.000604402	0.000430935	0.00032347	0.000660598	0.00068906	0.000692438	0.000685225	0.000681166
		electricity production, hydro, reservoir, non-alpine region | electricity, high voltage | cut-off, U - RU		0.0336796	0.0352336	0.0308145	0.0219706	0.0164917	0.0336796	0.0351307	0.0353029	0.0349352	0.0347282
		electricity production, hydro, run-of-river | electricity, high voltage | cut-off, U - RO		0.0145378	0.0152085	0.0133011	0.00948358	0.0071186	0.0145378	0.0151641	0.0152385	0.0150797	0.0149904
		electricity production, hydro, run-of-river | electricity, high voltage | cut-off, U - RU		0.102454	0.107181	0.0937383	0.0668349	0.0501679	0.102454	0.106868	0.107392	0.106273	0.105644
		electricity production, hydro, run-of-river | electricity, high voltage | cut-off, U - UA		0.0135682	0.0141943	0.012414	0.00885112	0.00664386	0.0135682	0.0141528	0.0142222	0.0140741	0.0139907
		electricity production, hydrogen, combined cycle power plant | electricity, high voltage | cut-off, U - RoW		0	0	0.001401	0.00602394	0.0209658	0	0	0	0	0
		electricity production, lignite | electricity, high voltage | cut-off, U - BG		0.0194057	0.0169394	6.07929e-06	1.38704e-06	0	0.0194057	0.019473	0.0198054	0.0201378	0.0204239
		electricity production, lignite | electricity, high voltage | cut-off, U - RO		0.0212501	0.0185493	6.65707e-06	1.51886e-06	0	0.0212501	0.0213237	0.0216878	0.0220517	0.022365
		electricity production, natural gas, combined cycle power plant | electricity, high voltage | cut-off, U - RU		0.00310213	0.00368164	0.00487913	0.00194893	0	0.00310213	0.00297757	0.00545024	0.00703484	0.00850218
		electricity production, natural gas, combined cycle power plant | electricity, high voltage | cut-off, U - UA		0.000155932	0.000185061	0.000245254	9.79648e-05	0	0.000155932	0.000149671	0.000273962	0.000353613	0.00042737
		electricity production, natural gas, conventional power plant | electricity, high voltage | cut-off, U - RO		0.00917804	0.0108926	0.0144355	0.00576615	0	0.00917804	0.00880952	0.0161252	0.0208134	0.0251548
		electricity production, natural gas, conventional power plant | electricity, high voltage | cut-off, U - RU		0.0233116	0.0276664	0.0366652	0.0146456	0	0.0233116	0.0223756	0.040957	0.0528648	0.0638914
		electricity production, natural gas, conventional power plant | electricity, high voltage | cut-off, U - UA		0.00793417	0.00941635	0.0124791	0.00498468	0	0.00793417	0.00761559	0.0139398	0.0179927	0.0217456
		electricity production, nuclear, boiling water reactor | electricity, high voltage | cut-off, U - RU		0.047102	0.0444576	0.0151605	0	0	0.047102	0.0464542	0.047512	0.0454412	0.0438929
		electricity production, nuclear, pressure water reactor | electricity, high voltage | cut-off, U - BG		0.00971352	0.00916819	0.00312646	0	0	0.00971352	0.00957995	0.00979808	0.00937104	0.00905174
		electricity production, nuclear, pressure water reactor | electricity, high voltage | cut-off, U - RU		0.0592972	0.0559681	0.0190858	0	0	0.0592972	0.0584817	0.0598133	0.0572064	0.0552572
		electricity production, nuclear, pressure water reactor | electricity, high voltage | cut-off, U - UA		0.0553862	0.0522767	0.0178269	0	0	0.0553862	0.0546245	0.0558683	0.0534333	0.0516127
		electricity production, nuclear, pressure water reactor, heavy water moderated | electricity, high voltage | cut-off, U - RO		0.00661672	0.00624524	0.0021297	0	0	0.00661672	0.00652573	0.00667432	0.00638342	0.00616592
		electricity production, nuclear, pressure water reactor, heavy water moderated | electricity, high voltage | cut-off, U - RU		0.0025891	0.00244374	0.000833344	0	0	0.0025891	0.0025535	0.00261164	0.00249781	0.0024127
		electricity production, oil | electricity, high voltage | cut-off, U - RO		0.000132247	0.000121464	3.35631e-05	1.90676e-05	0	0.000132247	0.00011896	7.67995e-05	3.21057e-05	1.97624e-05
		electricity production, oil | electricity, high voltage | cut-off, U - RU		0.00426533	0.00391756	0.0010825	0.000614984	0	0.00426533	0.00383678	0.002477	0.0010355	0.000637392
		electricity production, oil | electricity, high voltage | cut-off, U - UA		0.00062087	0.000570248	0.000157571	8.95182e-05	0	0.00062087	0.000558489	0.000360556	0.000150729	9.27799e-05
		electricity production, photovoltaic, 3kWp slanted-roof installation, multi-Si, panel, mounted | electricity, low voltage | cut-off, U - BG		0.000660978	0.00173379	0.0256126	0.0413896	0.0517063	0.000660978	0.0006508	0.00082874	0.000949213	0.00108681
		electricity production, photovoltaic, 3kWp slanted-roof installation, multi-Si, panel, mounted | electricity, low voltage | cut-off, U - RO		5.21824e-06	1.36878e-05	0.000202205	0.00032676	0.000408208	5.21824e-06	5.1379e-06	6.54268e-06	7.49379e-06	8.5801e-06
		electricity production, photovoltaic, 3kWp slanted-roof installation, multi-Si, panel, mounted | electricity, low voltage | cut-off, U - UA		6.74023e-05	0.000176801	0.00261181	0.00422065	0.00527268	6.74023e-05	6.63645e-05	8.45097e-05	9.67947e-05	0.000110826
		electricity production, photovoltaic, 3kWp slanted-roof installation, single-Si, panel, mounted | electricity, low voltage | cut-off, U - BG		0.000540958	0.00141897	0.0209619	0.0338741	0.0423175	0.000540958	0.000532629	0.000678258	0.000776856	0.00088947
		electricity production, photovoltaic, 3kWp slanted-roof installation, single-Si, panel, mounted | electricity, low voltage | cut-off, U - RO		4.23612e-06	1.11117e-05	0.000164148	0.00026526	0.000331379	4.23612e-06	4.17089e-06	5.31128e-06	6.08338e-06	6.96524e-06
		electricity production, photovoltaic, 3kWp slanted-roof installation, single-Si, panel, mounted | electricity, low voltage | cut-off, U - UA		5.52264e-05	0.000144863	0.00214	0.00345821	0.0043202	5.52264e-05	5.43761e-05	6.92434e-05	7.93092e-05	9.0806e-05
		electricity production, photovoltaic, 570kWp open ground installation, multi-Si | electricity, low voltage | cut-off, U - RoW		0.00133402	0.00349923	0.0516927	0.0835346	0.104356	0.00133402	0.00131348	0.00167261	0.00191575	0.00219346
		electricity production, wind, <1MW turbine, onshore | electricity, high voltage | cut-off, U - BG		0.00033407	0.000486091	0.00749921	0.0132704	0.0154765	0.00033407	0.000413045	0.000542387	0.000787642	0.000986672
		electricity production, wind, <1MW turbine, onshore | electricity, high voltage | cut-off, U - RO		0.000114147	0.00016609	0.00256238	0.00453432	0.0052881	0.000114147	0.000141132	0.000185326	0.000269126	0.000337132
		electricity production, wind, <1MW turbine, onshore | electricity, high voltage | cut-off, U - UA		4.40796e-05	6.41383e-05	0.000989499	0.001751	0.00204208	4.40796e-05	5.45001e-05	7.15664e-05	0.000103927	0.000130188
		electricity production, wind, >3MW turbine, onshore | electricity, high voltage | cut-off, U - BG		0.000423155	0.000615715	0.009499	0.0168092	0.0196036	0.000423155	0.00052319	0.000687024	0.00099768	0.00124978
		electricity production, wind, >3MW turbine, onshore | electricity, high voltage | cut-off, U - RO		0.000933152	0.00135779	0.0209474	0.0370681	0.0432302	0.000933152	0.00115375	0.00151504	0.00220011	0.00275605
		electricity production, wind, >3MW turbine, onshore | electricity, high voltage | cut-off, U - UA		6.29708e-05	9.16261e-05	0.00141357	0.00250142	0.00291725	6.29708e-05	7.78572e-05	0.000102238	0.000148467	0.000185984
		electricity production, wind, 1-3MW turbine, offshore | electricity, high voltage | cut-off, U - RoW		0	0	0.0289752	0.093788	0.126677	0	0	0.000968223	0.00258303	0.00388567
		electricity production, wind, 1-3MW turbine, onshore | electricity, high voltage | cut-off, U - BG		0.00125795	0.00183038	0.0282384	0.0499701	0.058277	0.00125795	0.00155533	0.00204237	0.00296588	0.00371533
		electricity production, wind, 1-3MW turbine, onshore | electricity, high voltage | cut-off, U - RO		0.00331122	0.00481801	0.0743303	0.131533	0.153399	0.00331122	0.00409399	0.005376	0.0078069	0.00977964
		electricity production, wind, 1-3MW turbine, onshore | electricity, high voltage | cut-off, U - UA		0.000368379	0.000536013	0.00826939	0.0146333	0.0170659	0.000368379	0.000455465	0.00059809	0.000868533	0.001088
		heat and power co-generation, biogas, gas engine | electricity, high voltage | cut-off, U - RO		5.71099e-05	0.000601879	0.00372273	0.00438842	0.00426787	5.71099e-05	0.000255416	0.000498794	0.000892367	0.0012109
		heat and power co-generation, hard coal | electricity, high voltage | cut-off, U - RU		0.10064	0.0966366	0.0262454	0	0	0.10064	0.0971865	0.0873289	0.0778957	0.070148
		heat and power co-generation, hydrogen, combined cycle power plant, 400MW electrical | electricity, high voltage | cut-off, U - RoW		0	0	0.00592241	0.0301197	0.0651359	0	0	0	0	0
		heat and power co-generation, lignite | electricity, high voltage | cut-off, U - RU		0.0478283	0.0451382	0.0073319	0	0	0.0478283	0.0450335	0.0395567	0.0342769	0.0301955
		heat and power co-generation, natural gas, combined cycle power plant, 400MW electrical | electricity, high voltage | cut-off, U - BG		9.56609e-05	9.26735e-05	7.56257e-05	3.57515e-05	0	9.56609e-05	9.35294e-05	8.85347e-05	8.2093e-05	7.73548e-05
		heat and power co-generation, natural gas, combined cycle power plant, 400MW electrical | electricity, high voltage | cut-off, U - RO		0.000305881	0.000296328	0.000241817	0.000114317	0	0.000305881	0.000299065	0.000283094	0.000262497	0.000247346
		heat and power co-generation, natural gas, combined cycle power plant, 400MW electrical | electricity, high voltage | cut-off, U - RU		0.0173891	0.0168461	0.0137472	0.00649886	0	0.0173891	0.0170017	0.0160937	0.0149228	0.0140615
		heat and power co-generation, natural gas, conventional power plant, 100MW electrical | electricity, high voltage | cut-off, U - RO		0.00401174	0.00388646	0.00317153	0.00149931	0	0.00401174	0.00392235	0.00371289	0.00344274	0.00324403
		heat and power co-generation, natural gas, conventional power plant, 100MW electrical | electricity, high voltage | cut-off, U - RU		0.335595	0.325114	0.265308	0.125422	0	0.335595	0.328117	0.310595	0.287996	0.271374
		heat and power co-generation, natural gas, conventional power plant, 100MW electrical | electricity, high voltage | cut-off, U - UA		0.00974075	0.00943655	0.00770065	0.00364042	0	0.00974075	0.00952371	0.00901512	0.00835919	0.00787671
		heat and power co-generation, oil | electricity, high voltage | cut-off, U - RO		0.000180442	9.30646e-05	0	0	0	0.000180442	9.46977e-05	1.39273e-05	5.27715e-06	0
		heat and power co-generation, oil | electricity, high voltage | cut-off, U - RU		0.00696529	0.00359242	0	0	0	0.00696529	0.00365546	0.000537614	0.000203705	0
		heat and power co-generation, oil | electricity, high voltage | cut-off, U - UA		6.72052e-05	3.46618e-05	0	0	0	6.72052e-05	3.527e-05	5.18721e-06	1.96546e-06	0
		heat and power co-generation, wood chips, 6667 kW | electricity, high voltage | cut-off, U - BG		0.000188384	0.00198537	0.0122799	0.0144757	0.0140781	0.000188384	0.000842521	0.00164533	0.00294358	0.00399429
		heat and power co-generation, wood chips, 6667 kW | electricity, high voltage | cut-off, U - UA		0.000383466	0.00404134	0.0249964	0.0294662	0.0286568	0.000383466	0.001715	0.00334917	0.00599183	0.00813061
		heat and power co-generation, wood chips, 6667 kW, state-of-the-art 2014 | electricity, high voltage | cut-off, U - RO		0.000543359	0.00572645	0.0354191	0.0417527	0.0406057	0.000543359	0.0024301	0.00474566	0.00849023	0.0115208
	India	electricity production CSP mix, electricity high voltage, cut-off, U - GLO	IN	0	0.000503424	0.0583986	0.0966599	0.103219	0	0.000501312	0.000658647	0.000842978	0.00108124
		electricity production, deep geothermal | electricity, high voltage | cut-off, U - RoW		0	0	0.0115906	0.0396209	0.0477793	0	0	0.000134169	0.000234622	0.000367185
		electricity production, hard coal | electricity, high voltage | cut-off, U - IN		0.639472	0.579821	0.202287	0.0464572	0	0.639472	0.590147	0.52611	0.510095	0.478356
		electricity production, hydro, reservoir, alpine region | electricity, high voltage | cut-off, U - IN		0.087828	0.0794783	0.0618412	0.0414394	0.0334749	0.087828	0.0791449	0.0728186	0.0624649	0.0567011
		electricity production, hydro, run-of-river | electricity, high voltage | cut-off, U - IN		0.0119731	0.0108349	0.00843049	0.00564923	0.00456346	0.0119731	0.0107894	0.00992699	0.00851552	0.00772977
		electricity production, hydrogen, combined cycle power plant | electricity, high voltage | cut-off, U - RoW		0	0	0	0.00589903	0.0135503	0	0	0	0	0
		electricity production, lignite | electricity, high voltage | cut-off, U - IN		0.112922	0.0926916	0.0413169	0.0150358	0	0.112922	0.0958836	0.0823034	0.0806995	0.080162
		electricity production, natural gas, combined cycle power plant | electricity, high voltage | cut-off, U - IN		0.0416534	0.049022	0.0590055	0.0298571	0	0.0416534	0.0469706	0.05379	0.0548085	0.0592789
		electricity production, natural gas, conventional power plant | electricity, high voltage | cut-off, U - IN		0.00890873	0.0104847	0.01262	0.00638577	0	0.00890873	0.010046	0.0115045	0.0117223	0.0126784
		electricity production, nuclear, boiling water reactor | electricity, high voltage | cut-off, U - IN		0.00185154	0.00232639	0.00131953	0.00027221	0	0.00185154	0.00231663	0.00273202	0.00286112	0.00290627
		electricity production, nuclear, pressure water reactor, heavy water moderated | electricity, high voltage | cut-off, U - IN		0.0251935	0.0316547	0.0179545	0.00370391	0	0.0251935	0.0315219	0.0371741	0.0389306	0.039545
		electricity production, oil | electricity, high voltage | cut-off, U - IN		0.0165914	0.0119794	0.00145574	0	0	0.0165914	0.0134638	0.0103188	0.00486477	0.00244998
		electricity production, photovoltaic, 3kWp slanted-roof installation, multi-Si, panel, mounted | electricity, low voltage | cut-off, U - IN		0.00112158	0.0142111	0.061349	0.0860949	0.0972749	0.00112158	0.012992	0.0271188	0.0338206	0.0425953
		electricity production, photovoltaic, 3kWp slanted-roof installation, single-Si, panel, mounted | electricity, low voltage | cut-off, U - IN		0.000917095	0.0116202	0.0501639	0.0703981	0.0795397	0.000917095	0.0106233	0.0221745	0.0276544	0.0348293
		electricity production, photovoltaic, 570kWp open ground installation, multi-Si | electricity, low voltage | cut-off, U - RoW		0.00203868	0.0258313	0.111513	0.156493	0.176815	0.00203868	0.0236154	0.0492933	0.0614751	0.0774245
		electricity production, wind, <1MW turbine, onshore | electricity, high voltage | cut-off, U - IN		0.00911237	0.0161156	0.0623607	0.0862256	0.0996921	0.00911237	0.0147687	0.0206827	0.0232415	0.024377
		electricity production, wind, >3MW turbine, onshore | electricity, high voltage | cut-off, U - IN		0.00552643	0.00977373	0.0378202	0.0522938	0.0604608	0.00552643	0.00895686	0.0125436	0.0140954	0.014784
		electricity production, wind, 1-3MW turbine, offshore | electricity, high voltage | cut-off, U - RoW		0	0	0.0433084	0.0579294	0.0578879	0	0	0.000765372	0.00118972	0.00141562
		electricity production, wind, 1-3MW turbine, onshore | electricity, high voltage | cut-off, U - IN		0.0162956	0.0288195	0.111519	0.154197	0.178279	0.0162956	0.0264108	0.0369867	0.0415626	0.0435932
		heat and power co-generation, biogas, gas engine | electricity, high voltage | cut-off, U - IN		0.000849216	0.00111818	0.00171535	0.00170533	0.00193873	0.000849216	0.000996669	0.00104868	0.00095568	0.000900942
		heat and power co-generation, hydrogen, combined cycle power plant, 400MW electrical | electricity, high voltage | cut-off, U - RoW		0	0	0	0.00112768	0.00501345	0	0	0	0	0
		heat and power co-generation, natural gas, combined cycle power plant, 400MW electrical | electricity, high voltage | cut-off, U - RoW		0	0.000318493	0.0081871	0.00692146	0	0	0	0	0	0
		heat and power co-generation, wood chips, 6667 kW | electricity, high voltage | cut-off, U - IN		0.0177447	0.0233647	0.0358428	0.0356335	0.0405104	0.0177447	0.0208258	0.0219125	0.0199693	0.0188255
	Latin America	electricity production CSP mix, electricity high voltage, cut-off, U - GLO	BR, CL, PE	0	0.000998895	0.0307051	0.0626713	0.0746215	0	0.000541857	0.0307051	0.0032836	0.00554619
		electricity production, deep geothermal | electricity, high voltage | cut-off, U - RoW		0.00300103	0.00599337	0.0175429	0.0290112	0.0371004	0.00300103	0.00425255	0.0175429	0.00841005	0.00896282
		electricity production, hard coal | electricity, high voltage | cut-off, U - BR		0.00121334	0.000846434	0.000160968	8.06812e-06	0	0.00121334	0.00157001	0.000160968	0.00146431	0.000919472
		electricity production, hard coal | electricity, high voltage | cut-off, U - CL		0.0352983	0.0246243	0.00468286	0.000234716	0	0.0352983	0.0456744	0.00468286	0.0425993	0.0267491
		electricity production, hard coal | electricity, high voltage | cut-off, U - PE		0.00111846	0.00078024	0.00014838	7.43716e-06	0	0.00111846	0.00144723	0.00014838	0.00134979	0.000847566
		electricity production, hydro, reservoir, alpine region | electricity, high voltage | cut-off, U - PE		0.0258909	0.0255123	0.0198095	0.014601	0.0118386	0.0258909	0.0262772	0.0198095	0.0248003	0.0238964
		electricity production, hydro, reservoir, tropical region | electricity, high voltage | cut-off, U - BR		0.473749	0.466821	0.362472	0.267168	0.21662	0.473749	0.480817	0.362472	0.453792	0.437253
		electricity production, hydro, run-of-river | electricity, high voltage | cut-off, U - CL		0.0244391	0.0240817	0.0186987	0.0137823	0.0111747	0.0244391	0.0248037	0.0186987	0.0234096	0.0225564
		electricity production, hydrogen, combined cycle power plant | electricity, high voltage | cut-off, U - RoW		0	0	0	0.00357925	0.0172356	0	0	0	0	0
		electricity production, lignite | electricity, high voltage | cut-off, U - BR		0.00578324	0.00466151	0.000501225	0	0	0.00578324	0.00530882	0.000501225	0.00405425	0.00381816
		electricity production, natural gas, combined cycle power plant | electricity, high voltage | cut-off, U - BR		0.0370631	0.0313631	0.0144534	0.00521377	0	0.0370631	0.0345963	0.0144534	0.0454241	0.0499208
		electricity production, natural gas, combined cycle power plant | electricity, high voltage | cut-off, U - CL		0.0233518	0.0197605	0.00910644	0.00328497	0	0.0233518	0.0217977	0.00910644	0.0286198	0.0314529
		electricity production, natural gas, combined cycle power plant | electricity, high voltage | cut-off, U - PE		0.00578416	0.0048946	0.00225563	0.000813675	0	0.00578416	0.00539919	0.00225563	0.00708899	0.00779076
		electricity production, natural gas, conventional power plant | electricity, high voltage | cut-off, U - BR		0.0666343	0.0563865	0.0259851	0.00937365	0	0.0666343	0.0621994	0.0259851	0.0816662	0.0897507
		electricity production, natural gas, conventional power plant | electricity, high voltage | cut-off, U - CL		0.0143764	0.0121654	0.0056063	0.00202237	0	0.0143764	0.0134195	0.0056063	0.0176195	0.0193637
		electricity production, natural gas, conventional power plant | electricity, high voltage | cut-off, U - PE		0.0393779	0.0333219	0.0153561	0.00553941	0	0.0393779	0.0367571	0.0153561	0.0482611	0.0530386
		electricity production, nuclear, pressure water reactor | electricity, high voltage | cut-off, U - BR		0.0170918	0.0116538	0.00852083	0	0	0.0170918	0.019596	0.00852083	0.0228428	0.0229412
		electricity production, oil | electricity, high voltage | cut-off, U - BR		0.0805589	0.0677458	0.0189938	0.000931668	0	0.0805589	0.0578735	0.0189938	0.0193038	0.0137492
		electricity production, oil | electricity, high voltage | cut-off, U - CL		0.0363692	0.0305846	0.00857496	0.000420612	0	0.0363692	0.0261276	0.00857496	0.00871493	0.00620724
		electricity production, oil | electricity, high voltage | cut-off, U - PE		0.00849779	0.0071462	0.00200357	9.82774e-05	0	0.00849779	0.00610481	0.00200357	0.00203627	0.00145034
		electricity production, photovoltaic, 3kWp slanted-roof installation, multi-Si, panel, mounted | electricity, low voltage | cut-off, U - RoW		0.000445466	0.00940293	0.036394	0.0469672	0.0555397	0.000445466	0.00208855	0.036394	0.00530968	0.00694171
		electricity production, photovoltaic, 3kWp slanted-roof installation, single-Si, panel, mounted | electricity, low voltage | cut-off, U - RoW		0.000445466	0.00940293	0.036394	0.0469672	0.0555397	0.000445466	0.00208855	0.036394	0.00530968	0.00694171
		electricity production, photovoltaic, 570kWp open ground installation, multi-Si | electricity, low voltage | cut-off, U - RoW		0.000890931	0.0188059	0.072788	0.0939345	0.111079	0.000890931	0.0041771	0.072788	0.0106194	0.0138834
		electricity production, wind, <1MW turbine, onshore | electricity, high voltage | cut-off, U - BR		0.00133247	0.00282565	0.00785688	0.0116839	0.0120581	0.00133247	0.00245168	0.00785688	0.00375096	0.0042278
		electricity production, wind, <1MW turbine, onshore | electricity, high voltage | cut-off, U - CL		2.95181e-05	6.25964e-05	0.000174053	0.000258834	0.000267122	2.95181e-05	5.43118e-05	0.000174053	8.30947e-05	9.36582e-05
		electricity production, wind, <1MW turbine, onshore | electricity, high voltage | cut-off, U - PE		1.33923e-08	2.83999e-08	7.89674e-08	1.17432e-07	1.21193e-07	1.33923e-08	2.46411e-08	7.89674e-08	3.76999e-08	4.24925e-08
		electricity production, wind, >3MW turbine, onshore | electricity, high voltage | cut-off, U - BR		0.000512488	0.00108679	0.00302188	0.00449383	0.00463773	0.000512488	0.000942952	0.00302188	0.00144268	0.00162608
		electricity production, wind, 1-3MW turbine, offshore | electricity, high voltage | cut-off, U - RoW		0	0.000532744	0.016375	0.0556361	0.0728805	0	0	0.016375	0.00335062	0.00537769
		electricity production, wind, 1-3MW turbine, onshore | electricity, high voltage | cut-off, U - BR		0.0208583	0.0442323	0.12299	0.182899	0.188756	0.0208583	0.0383782	0.12299	0.0587169	0.0661813
		electricity production, wind, 1-3MW turbine, onshore | electricity, high voltage | cut-off, U - CL		0.00181026	0.00383886	0.0106742	0.0158735	0.0163818	0.00181026	0.00333079	0.0106742	0.00509596	0.00574379
		electricity production, wind, 1-3MW turbine, onshore | electricity, high voltage | cut-off, U - PE		4.48259e-06	9.50583e-06	2.64315e-05	3.93062e-05	4.05649e-05	4.48259e-06	8.24774e-06	2.64315e-05	1.26187e-05	1.42228e-05
		heat and power co-generation, biogas, gas engine | electricity, high voltage | cut-off, U - PE		0.000117122	0.000133337	0.000245295	0.000250074	0.00024694	0.000117122	0.000117149	0.000245295	0.000111205	0.000117043
		heat and power co-generation, hard coal | electricity, high voltage | cut-off, U - RoW		0.000765888	0.000879027	0	0	0	0.000765888	0.00078192	0	6.70123e-05	0.000229448
		heat and power co-generation, hydrogen, combined cycle power plant, 400MW electrical | electricity, high voltage | cut-off, U - RoW		0	0	0	0.00120759	0.00321342	0	0	0	0	0
		heat and power co-generation, lignite | electricity, high voltage | cut-off, U - RoW		0.000257901	0	0	0	0	0.000257901	0.000178333	0	0.000134025	0.00012548
		heat and power co-generation, natural gas, combined cycle power plant, 400MW electrical | electricity, high voltage | cut-off, U - BR		0.0135849	0.013361	0.0152955	0.00775884	0	0.0135849	0.0122773	0.0152955	0.00741613	0.00630417
		heat and power co-generation, natural gas, conventional power plant, 100MW electrical | electricity, high voltage | cut-off, U - BR		0.000963605	0.000947724	0.00108494	0.00055035	0	0.000963605	0.000870851	0.00108494	0.000526041	0.000447167
		heat and power co-generation, natural gas, conventional power plant, 100MW electrical | electricity, high voltage | cut-off, U - PE		0.000956805	0.000941036	0.00107728	0.000546466	0	0.000956805	0.000864705	0.00107728	0.000522328	0.000444012
		heat and power co-generation, oil | electricity, high voltage | cut-off, U - BR		0.00486886	0.0044018	0	0	0	0.00486886	0.0042937	0	0.00291085	0.00258129
		heat and power co-generation, wood chips, 6667 kW | electricity, high voltage | cut-off, U - CL		0.00632245	0.00719778	0.0132414	0.0134994	0.0133302	0.00632245	0.0063239	0.0132414	0.00600306	0.00631818
		heat and power co-generation, wood chips, 6667 kW | electricity, high voltage | cut-off, U - PE		0.000755286	0.000859854	0.00158184	0.00161266	0.00159245	0.000755286	0.000755459	0.00158184	0.000717132	0.000754776
		heat and power co-generation, wood chips, 6667 kW, state-of-the-art 2014 | electricity, high voltage | cut-off, U - RoW		0.0454561	0.0517494	0.095201	0.097056	0.0958396	0.0454561	0.0454665	0.095201	0.0431598	0.0454254
	Middle East	electricity production CSP mix, electricity high voltage, cut-off, U - ME	IR, SA	0.000219805	0.00409964	0.0642299	0.240372	0.296288	0.000219805	0.001728	0.00539598	0.00797895	0.0113603
		electricity production, deep geothermal | electricity, high voltage | cut-off, U - RoW		0	0.000409964	0.0128374	0.024067	0.0219219	0	0	0	0	0
		electricity production, hard coal | electricity, high voltage | cut-off, U - RoW		4.77838e-05	0	0	0	0	4.77838e-05	0.00540408	0.00906571	0.00755386	0.00615801
		electricity production, hydro, run-of-river | electricity, high voltage | cut-off, U - IR		0.0168295	0.0200554	0.0178659	0.0122193	0.00998758	0.0168295	0.0199372	0.0196815	0.0170504	0.0160209
		electricity production, hydrogen, combined cycle power plant | electricity, high voltage | cut-off, U - RoW		0	0	0.00395244	0.0153998	0.0239148	0	0	0	0	0
		electricity production, natural gas, combined cycle power plant | electricity, high voltage | cut-off, U - IR		0.15607	0.149285	0.0908069	0.0202421	0	0.15607	0.156925	0.173937	0.17956	0.175728
		electricity production, natural gas, combined cycle power plant | electricity, high voltage | cut-off, U - SA		0.0111691	0.0106836	0.00649856	0.00144862	0	0.0111691	0.0112303	0.0124477	0.0128501	0.0125759
		electricity production, natural gas, conventional power plant | electricity, high voltage | cut-off, U - IR		0.274476	0.262544	0.1597	0.0355992	0	0.274476	0.27598	0.305898	0.315787	0.309048
		electricity production, natural gas, conventional power plant | electricity, high voltage | cut-off, U - SA		0.231119	0.221072	0.134473	0.0299759	0	0.231119	0.232386	0.257577	0.265905	0.26023
		electricity production, nuclear, pressure water reactor | electricity, high voltage | cut-off, U - IR		0.00278102	0.00245978	0.00159802	0	0	0.00278102	0.0213229	0.0320295	0.037663	0.045687
		electricity production, oil | electricity, high voltage | cut-off, U - IR		0.0968883	0.0832682	0.0354081	0.000919517	0	0.0968883	0.0836911	0.049285	0.0319825	0.0225201
		electricity production, oil | electricity, high voltage | cut-off, U - SA		0.209989	0.18047	0.0767411	0.0019929	0	0.209989	0.181386	0.106817	0.0693166	0.0488085
		electricity production, photovoltaic, 3kWp slanted-roof installation, multi-Si, panel, mounted | electricity, low voltage | cut-off, U - SA		1.83968e-05	0.0090192	0.0541351	0.0967413	0.113139	1.83968e-05	0.00143457	0.00307436	0.00512255	0.00788149
		electricity production, photovoltaic, 3kWp slanted-roof installation, single-Si, panel, mounted | electricity, low voltage | cut-off, U - SA		1.50519e-05	0.00737935	0.0442924	0.079152	0.0925683	1.50519e-05	0.00117374	0.00251538	0.00419118	0.0064485
		electricity production, photovoltaic, 570kWp open ground installation, multi-Si | electricity, low voltage | cut-off, U - RoW		3.34487e-05	0.0163986	0.0984275	0.175893	0.205707	3.34487e-05	0.00260831	0.00558974	0.00931373	0.01433
		electricity production, wind, <1MW turbine, onshore | electricity, high voltage | cut-off, U - IR		0.000286703	0.0253213	0.157918	0.212378	0.187182	0.000286703	0.00358882	0.0119107	0.022396	0.0364017
		electricity production, wind, 1-3MW turbine, offshore | electricity, high voltage | cut-off, U - RoW		0	0	0.00799011	0.0137091	0.0167823	0	0	0.000293579	0.00212545	0.00562633
		electricity production, wind, 1-3MW turbine, onshore | electricity, high voltage | cut-off, U - IR		3.8227e-05	0.00337617	0.0210557	0.028317	0.0249575	3.8227e-05	0.000478509	0.00158809	0.00298614	0.00485356
		heat and power co-generation, biogas, gas engine | electricity, high voltage | cut-off, U - IR		1.91135e-05	0.00409964	0.00799011	0.00761615	0.00629337	1.91135e-05	0.000725435	0.00273615	0.0075241	0.0149273
		heat and power co-generation, hydrogen, combined cycle power plant, 400MW electrical | electricity, high voltage | cut-off, U - RoW		0	0	4.26139e-05	0.000594059	0.00125867	0	0	0	0	0
		heat and power co-generation, natural gas, combined cycle power plant, 400MW electrical | electricity, high voltage | cut-off, U - IR		0	6.75149e-07	4.74334e-05	3.9599e-05	0	0	0	1.72672e-06	7.50065e-06	1.58335e-05
		heat and power co-generation, natural gas, combined cycle power plant, 400MW electrical | electricity, high voltage | cut-off, U - SA		0	1.10262e-05	0.000774661	0.000646713	0	0	0	2.82e-05	0.000122497	0.000258585
		heat and power co-generation, natural gas, conventional power plant, 100MW electrical | electricity, high voltage | cut-off, U - IR		0	1.44345e-05	0.00101411	0.000846613	0	0	0	3.69167e-05	0.000160362	0.000338514
		heat and power co-generation, natural gas, conventional power plant, 100MW electrical | electricity, high voltage | cut-off, U - SA		0	3.12591e-05	0.00219614	0.00183341	0	0	0	7.99461e-05	0.000347276	0.00073308
	OECD Europe	electricity production CSP mix, electricity high voltage, cut-off, U - GLO	AT, BE, CH, CZ, DK, EE, ES, FI, FR, GB, GR, HU, IE, IS, IT, LU, NL, NO, PL, PT, SE, SK, TR	0.00157503	0.00227848	0.0164235	0.0304949	0.0385649	0.00157503	0.00223135	0.00241868	0.00454926	0.00702092
		electricity production, deep geothermal | electricity, high voltage | cut-off, U - IT		0.00293819	0.00274929	0.0103717	0.0185879	0.0265544	0.00293819	0.00273461	0.0015297	0.000795084	0.000232367
		electricity production, deep geothermal | electricity, high voltage | cut-off, U - TR		5.48125e-07	5.12884e-07	1.93486e-06	3.4676e-06	4.95377e-06	5.48125e-07	5.10147e-07	2.85369e-07	1.48324e-07	4.33485e-08
		electricity production, hard coal | electricity, high voltage | cut-off, U - ES		0.0228759	0.0130898	0.000663581	0	0	0.0228759	0.0179592	0.0145854	0.0114793	0.0104823
		electricity production, hard coal | electricity, high voltage | cut-off, U - GB		0.0638444	0.0365324	0.00185199	0	0	0.0638444	0.0501224	0.0407062	0.0320374	0.029255
		electricity production, hard coal | electricity, high voltage | cut-off, U - IT		0.0212946	0.012185	0.000617709	0	0	0.0212946	0.0167178	0.0135771	0.0106857	0.00975769
		electricity production, hydro, pumped storage | electricity, high voltage | cut-off, U - ES		0.00336102	0.00338367	0.00307909	0.00266312	0.00245104	0.00336102	0.00331368	0.00326432	0.00314498	0.00311124
		electricity production, hydro, pumped storage | electricity, high voltage | cut-off, U - FR		0.00461566	0.00464677	0.00422849	0.00365724	0.003366	0.00461566	0.00455066	0.00448287	0.00431898	0.00427265
		electricity production, hydro, pumped storage | electricity, high voltage | cut-off, U - GB		0.00282436	0.0028434	0.00258745	0.0022379	0.00205968	0.00282436	0.00278459	0.00274311	0.00264282	0.00261447
		electricity production, hydro, reservoir, alpine region | electricity, high voltage | cut-off, U - FR		0.00805625	0.00811055	0.00738047	0.00638341	0.00587506	0.00805625	0.0079428	0.00782448	0.00753841	0.00745755
		electricity production, hydro, reservoir, alpine region | electricity, high voltage | cut-off, U - IT		0.0254623	0.025634	0.0233265	0.0201752	0.0185685	0.0254623	0.0251038	0.0247298	0.0238256	0.0235701
		electricity production, hydro, reservoir, non-alpine region | electricity, high voltage | cut-off, U - ES		0.00648904	0.00653278	0.00594472	0.00514162	0.00473217	0.00648904	0.00639766	0.00630235	0.00607193	0.00600681
		electricity production, hydro, reservoir, non-alpine region | electricity, high voltage | cut-off, U - TR		0.0276857	0.0278723	0.0253633	0.0219369	0.0201899	0.0276857	0.0272958	0.0268892	0.0259061	0.0256282
		electricity production, hydro, run-of-river | electricity, high voltage | cut-off, U - FR		0.039858	0.0401267	0.0365146	0.0315817	0.0290667	0.039858	0.0392967	0.0387113	0.037296	0.036896
		electricity production, hydro, run-of-river | electricity, high voltage | cut-off, U - IT		0.014322	0.0144185	0.0131206	0.0113481	0.0104444	0.014322	0.0141203	0.01391	0.0134014	0.0132577
		electricity production, hydro, run-of-river | electricity, high voltage | cut-off, U - TR		0.0276857	0.0278723	0.0253633	0.0219369	0.0201899	0.0276857	0.0272958	0.0268892	0.0259061	0.0256282
		electricity production, hydrogen, combined cycle power plant | electricity, high voltage | cut-off, U - RoW		0	0	0	0.0100858	0.0131807	0	0	0	0	0
		electricity production, lignite | electricity, high voltage | cut-off, U - ES		0.00477791	0.00404969	0.000470119	0	0	0.00477791	0.00431613	0.0036316	0.00308546	0.00241841
		electricity production, lignite | electricity, high voltage | cut-off, U - IT		0.0013221	0.00112059	0.000130087	0	0	0.0013221	0.00119432	0.0010049	0.00085378	0.000669199
		electricity production, lignite | electricity, high voltage | cut-off, U - TR		0.0557572	0.047259	0.00548619	0	0	0.0557572	0.0503684	0.04238	0.0360067	0.0282223
		electricity production, natural gas, combined cycle power plant | electricity, high voltage | cut-off, U - ES		0.0176098	0.0210371	0.0238151	0.0102977	0	0.0176098	0.0215191	0.0303511	0.0350937	0.03527
		electricity production, natural gas, combined cycle power plant | electricity, high voltage | cut-off, U - IT		0.0168618	0.0201436	0.0228036	0.0098603	0	0.0168618	0.0206052	0.029062	0.0336031	0.033772
		electricity production, natural gas, combined cycle power plant | electricity, high voltage | cut-off, U - TR		0.0361509	0.0431869	0.0488897	0.02114	0	0.0361509	0.0441764	0.0623074	0.0720433	0.0724052
		electricity production, natural gas, conventional power plant | electricity, high voltage | cut-off, U - GB		0.019755	0.0235999	0.0267163	0.0115521	0	0.019755	0.0241406	0.0340485	0.0393688	0.0395665
		electricity production, natural gas, conventional power plant | electricity, high voltage | cut-off, U - IT		0.00428446	0.00511834	0.00579422	0.00250542	0	0.00428446	0.00523561	0.00738443	0.00853829	0.00858118
		electricity production, natural gas, conventional power plant | electricity, high voltage | cut-off, U - TR		0.00308004	0.00367951	0.00416539	0.00180112	0	0.00308004	0.00376381	0.00530857	0.00613807	0.0061689
		electricity production, nuclear, boiling water reactor | electricity, high voltage | cut-off, U - ES		0.00514559	0.00485328	0.00161391	0	0	0.00514559	0.00486946	0.00344649	0.00303953	0.0027504
		electricity production, nuclear, boiling water reactor | electricity, high voltage | cut-off, U - GB		0.0262993	0.0248053	0.00824872	0	0	0.0262993	0.024888	0.0176151	0.0155351	0.0140574
		electricity production, nuclear, pressure water reactor | electricity, high voltage | cut-off, U - ES		0.0206382	0.0194658	0.00647314	0	0	0.0206382	0.0195307	0.0138234	0.0121911	0.0110315
		electricity production, nuclear, pressure water reactor | electricity, high voltage | cut-off, U - FR		0.176884	0.166836	0.0554793	0	0	0.176884	0.167392	0.118476	0.104486	0.0945474
		electricity production, nuclear, pressure water reactor | electricity, high voltage | cut-off, U - GB		0.00389503	0.00367377	0.00122167	0	0	0.00389503	0.00368602	0.00260888	0.00230082	0.00208196
		electricity production, oil | electricity, high voltage | cut-off, U - ES		0.00747673	0.00397446	0.000820256	0.000420909	0	0.00747673	0.00401489	0.00223674	0.00180517	0.00119022
		electricity production, oil | electricity, high voltage | cut-off, U - FR		0.0015927	0.000846643	0.000174732	8.96625e-05	0	0.0015927	0.000855255	0.000476473	0.000384538	0.000253543
		electricity production, oil | electricity, high voltage | cut-off, U - IT		0.00202622	0.00107709	0.000222292	0.000114068	0	0.00202622	0.00108805	0.000606164	0.000489205	0.000322554
		electricity production, photovoltaic, 3kWp slanted-roof installation, multi-Si, panel, mounted | electricity, low voltage | cut-off, U - ES		0.00267757	0.00388636	0.0107474	0.0171389	0.0214653	0.00267757	0.00317892	0.00394625	0.00421363	0.00460337
		electricity production, photovoltaic, 3kWp slanted-roof installation, multi-Si, panel, mounted | electricity, low voltage | cut-off, U - FR		0.00160854	0.00233472	0.00645645	0.0102961	0.0128952	0.00160854	0.00190972	0.0023707	0.00253132	0.00276545
		electricity production, photovoltaic, 3kWp slanted-roof installation, multi-Si, panel, mounted | electricity, low voltage | cut-off, U - IT		0.00350273	0.00508405	0.0140595	0.0224207	0.0280804	0.00350273	0.00415859	0.0051624	0.00551217	0.00602202
		electricity production, photovoltaic, 3kWp slanted-roof installation, single-Si, panel, mounted | electricity, low voltage | cut-off, U - ES		0.00219091	0.00318	0.00879399	0.0140238	0.0175639	0.00219091	0.00260114	0.003229	0.00344778	0.00376668
		electricity production, photovoltaic, 3kWp slanted-roof installation, single-Si, panel, mounted | electricity, low voltage | cut-off, U - FR		0.00129654	0.00188186	0.00520412	0.00829904	0.010394	0.00129654	0.0015393	0.00191086	0.00204033	0.00222905
		electricity production, photovoltaic, 3kWp slanted-roof installation, single-Si, panel, mounted | electricity, low voltage | cut-off, U - IT		0.00280177	0.00406663	0.0112459	0.0179339	0.022461	0.00280177	0.00332638	0.0041293	0.00440908	0.0048169
		electricity production, photovoltaic, 570kWp open ground installation, multi-Si | electricity, low voltage | cut-off, U - ES		0.002999	0.0043529	0.0120375	0.0191963	0.0240421	0.002999	0.00356053	0.00441998	0.00471945	0.00515597
		electricity production, photovoltaic, 570kWp open ground installation, multi-Si | electricity, low voltage | cut-off, U - FR		0.000924526	0.0013419	0.00371092	0.00591782	0.00741166	0.000924526	0.00109764	0.00136258	0.00145491	0.00158948
		electricity production, photovoltaic, 570kWp open ground installation, multi-Si | electricity, low voltage | cut-off, U - IT		0.0101545	0.0147388	0.0407589	0.0649984	0.081406	0.0101545	0.0120559	0.014966	0.01598	0.017458
		electricity production, wind, <1MW turbine, onshore | electricity, high voltage | cut-off, U - ES		0.0163513	0.0221407	0.0426017	0.0583731	0.0627037	0.0163513	0.0210646	0.0285377	0.0321536	0.0360966
		electricity production, wind, <1MW turbine, onshore | electricity, high voltage | cut-off, U - GB		0.00124886	0.00169103	0.00325378	0.00445835	0.0047891	0.00124886	0.00160884	0.00217962	0.00245579	0.00275694
		electricity production, wind, <1MW turbine, onshore | electricity, high voltage | cut-off, U - IT		0.00351054	0.0047535	0.00914638	0.0125324	0.0134622	0.00351054	0.00452246	0.0061269	0.00690322	0.00774976
		electricity production, wind, >3MW turbine, onshore | electricity, high voltage | cut-off, U - GB		0.000725688	0.000982628	0.00189071	0.00259066	0.00278286	0.000725688	0.000934868	0.00126653	0.00142701	0.00160201
		electricity production, wind, >3MW turbine, onshore | electricity, high voltage | cut-off, U - IT		0.0010721	0.00145169	0.00279325	0.00382733	0.00411127	0.0010721	0.00138113	0.00187112	0.0021082	0.00236673
		electricity production, wind, >3MW turbine, onshore | electricity, high voltage | cut-off, U - TR		0.000753491	0.00102028	0.00196315	0.00268992	0.00288948	0.000753491	0.000970686	0.00131506	0.00148169	0.00166339
		electricity production, wind, 1-3MW turbine, offshore | electricity, high voltage | cut-off, U - ES		1.41406e-05	2.01011e-05	0.000103618	0.000191912	0.000237789	1.41406e-05	1.92897e-05	3.64797e-05	5.07296e-05	6.41763e-05
		electricity production, wind, 1-3MW turbine, offshore | electricity, high voltage | cut-off, U - FR		1.31236e-05	1.86555e-05	9.61663e-05	0.00017811	0.000220688	1.31236e-05	1.79025e-05	3.38562e-05	4.70813e-05	5.95609e-05
		electricity production, wind, 1-3MW turbine, offshore | electricity, high voltage | cut-off, U - GB		0.00940037	0.0133628	0.0688833	0.127579	0.158077	0.00940037	0.0128234	0.024251	0.033724	0.0426631
		electricity production, wind, 1-3MW turbine, onshore | electricity, high voltage | cut-off, U - ES		0.029707	0.0402253	0.0773989	0.106052	0.11392	0.029707	0.0382701	0.0518473	0.0584167	0.0655804
		electricity production, wind, 1-3MW turbine, onshore | electricity, high voltage | cut-off, U - FR		0.0130322	0.0176465	0.0339542	0.0465242	0.0499757	0.0130322	0.0167888	0.0227449	0.0256269	0.0287695
		electricity production, wind, 1-3MW turbine, onshore | electricity, high voltage | cut-off, U - GB		0.0103385	0.013999	0.026936	0.0369079	0.039646	0.0103385	0.0133186	0.0180437	0.0203299	0.022823
		heat and power co-generation, biogas, gas engine | electricity, high voltage | cut-off, U - FR		0.0461661	0.0412416	0.0172513	2.08213e-06	0	0.0461661	0.0412431	0.0263461	0.0211136	0.0146229
		heat and power co-generation, biogas, gas engine | electricity, high voltage | cut-off, U - GB		0.0283956	0.0257608	0	0	0	0.0283956	0.0259692	0.022712	0.0200985	0.018409
		heat and power co-generation, biogas, gas engine | electricity, high voltage | cut-off, U - IT		0.00233123	0.00303146	0.00539795	0.00497418	0.00434694	0.00233123	0.00272545	0.00313202	0.00317793	0.00329032
		heat and power co-generation, hard coal | electricity, high voltage | cut-off, U - RoW		0.0106243	0.0138155	0.0246005	0.0226692	0.0198106	0.0106243	0.0124209	0.0142738	0.014483	0.0149952
		heat and power co-generation, hydrogen, combined cycle power plant, 400MW electrical | electricity, high voltage | cut-off, U - RoW		0.0140209	0.0182324	0.0324654	0.0299167	0.0261443	0.0140209	0.016392	0.0188372	0.0191134	0.0197893
		heat and power co-generation, lignite | electricity, high voltage | cut-off, U - RoW		0	0	0	0.00990054	0.0319708	0	0	0	0	0
		heat and power co-generation, natural gas, combined cycle power plant, 400MW electrical | electricity, high voltage | cut-off, U - ES		0.00595712	0.00631292	0.0072958	0.00434431	0	0.00595712	0.00578842	0.00608296	0.00588971	0.00592529
		heat and power co-generation, natural gas, combined cycle power plant, 400MW electrical | electricity, high voltage | cut-off, U - GB		0.00679859	0.00720465	0.00832636	0.00495796	0	0.00679859	0.00660606	0.0069422	0.00672165	0.00676226
		heat and power co-generation, natural gas, combined cycle power plant, 400MW electrical | electricity, high voltage | cut-off, U - IT		0.028012	0.0296851	0.0343068	0.0204281	0	0.028012	0.0272187	0.0286037	0.027695	0.0278623
		heat and power co-generation, natural gas, conventional power plant, 100MW electrical | electricity, high voltage | cut-off, U - ES		0.0105311	0.0111601	0.0128977	0.00767995	0	0.0105311	0.0102329	0.0107536	0.0104119	0.0104748
		heat and power co-generation, natural gas, conventional power plant, 100MW electrical | electricity, high voltage | cut-off, U - FR		0.00837511	0.00887533	0.0102572	0.00610766	0	0.00837511	0.00813794	0.00855203	0.00828034	0.00833036
		heat and power co-generation, natural gas, conventional power plant, 100MW electrical | electricity, high voltage | cut-off, U - IT		0.0172658	0.0182971	0.0211458	0.0125913	0	0.0172658	0.0167769	0.0176305	0.0170704	0.0171736
		heat and power co-generation, oil | electricity, high voltage | cut-off, U - ES		0.000888274	0.000562611	1.14286e-05	0	0	0.000888274	0.000528818	0.000171501	2.77154e-05	0
		heat and power co-generation, oil | electricity, high voltage | cut-off, U - GB		0.000699812	0.000443244	9.00384e-06	0	0	0.000699812	0.00041662	0.000135114	2.18352e-05	0
		heat and power co-generation, oil | electricity, high voltage | cut-off, U - IT		0.00560239	0.00354841	7.20808e-05	0	0	0.00560239	0.00333528	0.00108166	0.000174803	0
		heat and power co-generation, wood chips, 6667 kW, state-of-the-art 2014 | electricity, high voltage | cut-off, U - ES		0.00614403	0.00798952	0.0142265	0.0131096	0.0114565	0.00614403	0.00718302	0.00825453	0.00837555	0.00867176
		heat and power co-generation, wood chips, 6667 kW, state-of-the-art 2014 | electricity, high voltage | cut-off, U - GB		0.012744	0.0165719	0.0295085	0.027192	0.0237631	0.012744	0.014899	0.0171216	0.0173726	0.017987
		heat and power co-generation, wood chips, 6667 kW, state-of-the-art 2014 | electricity, high voltage | cut-off, U - IT		0.00467738	0.00608233	0.0108304	0.0099802	0.00872171	0.00467738	0.00546834	0.00628408	0.0063762	0.0066017
	OECD North America	electricity production CSP mix, electricity high voltage, cut-off, U - GLO	CA-AB, CA-BC, CA-MB, CA-NB, CA-NF, CA-NS, CA-NT, CA-NU, CA-ON, CA-PE, CA-QC, CA-SK, CA-YK, MX, ASCC, FRCC, HICC, MRO, TRE, WECC, NPCC, SPP, RFC, SERC	0.000668785	0.000854358	0.0416352	0.0856462	0.0942223	0.000668785	0.000853136	0.00134561	0.00239351	0.00625175
		electricity production, deep geothermal | electricity, high voltage | cut-off, U - HICC		5.83411e-05	6.54933e-05	9.84792e-05	0.000205688	0.000297897	5.83411e-05	6.53996e-05	8.84967e-05	0.00011356	0.000143822
		electricity production, deep geothermal | electricity, high voltage | cut-off, U - MX		0.0012496	0.00140279	0.00210931	0.0044056	0.00638061	0.0012496	0.00140079	0.0018955	0.00243232	0.00308051
		electricity production, deep geothermal | electricity, high voltage | cut-off, U - WECC, US only		0.00342645	0.00384651	0.00578381	0.0120803	0.0174959	0.00342645	0.00384101	0.00519753	0.0066695	0.00844688
		electricity production, hard coal | electricity, high voltage | cut-off, U - RFC		0.0591774	0.051423	0.00522032	0	0	0.0591774	0.0531407	0.0498768	0.0459418	0.0391034
		electricity production, hard coal | electricity, high voltage | cut-off, U - SERC		0.0515836	0.0448244	0.00455044	0	0	0.0515836	0.0463216	0.0434766	0.0400465	0.0340856
		electricity production, hard coal | electricity, high voltage | cut-off, U - WECC, US only		0.0241825	0.0210137	0.00213325	0	0	0.0241825	0.0217156	0.0203819	0.0187738	0.0159794
		electricity production, hydro, pumped storage | electricity, high voltage | cut-off, U - NPCC, US only		0.000588686	0.000604412	0.000517862	0.000446958	0.000385855	0.000588686	0.000603547	0.000610103	0.00058935	0.000543906
		electricity production, hydro, pumped storage | electricity, high voltage | cut-off, U - RFC		0.00114508	0.00117567	0.00100732	0.000869397	0.000750543	0.00114508	0.00117399	0.00118674	0.00114637	0.00105798
		electricity production, hydro, pumped storage | electricity, high voltage | cut-off, U - SERC		0.00262667	0.00269684	0.00231066	0.00199429	0.00172166	0.00262667	0.00269298	0.00272223	0.00262963	0.00242687
		electricity production, hydro, reservoir, alpine region | electricity, high voltage | cut-off, U - CA-BC		0.0133967	0.0137545	0.0117849	0.0101714	0.00878087	0.0133967	0.0137349	0.0138841	0.0134118	0.0123776
		electricity production, hydro, reservoir, alpine region | electricity, high voltage | cut-off, U - NPCC, US only		0.00154583	0.00158713	0.00135985	0.00117367	0.00101322	0.00154583	0.00158485	0.00160207	0.00154757	0.00142824
		electricity production, hydro, reservoir, alpine region | electricity, high voltage | cut-off, U - WECC, US only		0.00935336	0.00960323	0.00822807	0.00710151	0.00613067	0.00935336	0.00958948	0.00969365	0.0093639	0.00864188
		electricity production, hydro, reservoir, non-alpine region | electricity, high voltage | cut-off, U - CA-MB		0.00862688	0.00885733	0.00758899	0.00654993	0.0056545	0.00862688	0.00884466	0.00894074	0.0086366	0.00797066
		electricity production, hydro, reservoir, non-alpine region | electricity, high voltage | cut-off, U - CA-ON		0.00791233	0.0081237	0.0069604	0.00600741	0.00518615	0.00791233	0.00811207	0.00820019	0.00792124	0.00731046
		electricity production, hydro, reservoir, non-alpine region | electricity, high voltage | cut-off, U - CA-QC		0.0214527	0.0220258	0.0188717	0.0162879	0.0140612	0.0214527	0.0219943	0.0222332	0.0214769	0.0198208
		electricity production, hydro, run-of-river | electricity, high voltage | cut-off, U - CA-QC		0.0130612	0.0134101	0.0114898	0.00991665	0.00856096	0.0130612	0.0133909	0.0135364	0.0130759	0.0120676
		electricity production, hydro, run-of-river | electricity, high voltage | cut-off, U - MX		0.00802506	0.00823944	0.00705958	0.006093	0.00526004	0.00802506	0.00822765	0.00831703	0.00803411	0.00741462
		electricity production, hydro, run-of-river | electricity, high voltage | cut-off, U - WECC, US only		0.0374153	0.0384148	0.0329139	0.0284074	0.0245239	0.0374153	0.0383598	0.0387765	0.0374575	0.0345692
		electricity production, hydrogen, combined cycle power plant | electricity, high voltage | cut-off, U - RoW		0	0	0.00421569	0.0104188	0.0207661	0	0	0	0	0
		electricity production, lignite | electricity, high voltage | cut-off, U - RFC		0.0703157	0.0629686	0.00148896	0	0	0.0703157	0.0628785	0.0508952	0.0436301	0.037263
		electricity production, lignite | electricity, high voltage | cut-off, U - SERC		0.0612924	0.0548881	0.00129789	0	0	0.0612924	0.0548096	0.044364	0.0380312	0.0324812
		electricity production, lignite | electricity, high voltage | cut-off, U - WECC, US only		0.028734	0.0257317	0.000608452	0	0	0.028734	0.0256949	0.0207979	0.0178291	0.0152272
		electricity production, natural gas, combined cycle power plant | electricity, high voltage | cut-off, U - MX		0.0488976	0.0511338	0.0379185	0.0143265	0	0.0488976	0.0510606	0.0558194	0.0612007	0.0650601
		electricity production, natural gas, combined cycle power plant | electricity, high voltage | cut-off, U - SERC		0.0397031	0.0415189	0.0307885	0.0116326	0	0.0397031	0.0414595	0.0453234	0.0496929	0.0528266
		electricity production, natural gas, combined cycle power plant | electricity, high voltage | cut-off, U - WECC, US only		0.0314244	0.0328616	0.0243686	0.00920701	0	0.0314244	0.0328145	0.0358728	0.0393312	0.0418114
		electricity production, natural gas, conventional power plant | electricity, high voltage | cut-off, U - SERC		0.0561774	0.0587466	0.0435638	0.0164594	0	0.0561774	0.0586626	0.0641298	0.0703123	0.0747463
		electricity production, natural gas, conventional power plant | electricity, high voltage | cut-off, U - TRE		0.0380528	0.0397931	0.0295087	0.0111491	0	0.0380528	0.0397362	0.0434395	0.0476273	0.0506308
		electricity production, natural gas, conventional power plant | electricity, high voltage | cut-off, U - WECC, US only		0.0444681	0.0465018	0.0344836	0.0130287	0	0.0444681	0.0464353	0.050763	0.0556568	0.0591666
		electricity production, nuclear, boiling water reactor | electricity, high voltage | cut-off, U - RFC		0.025487	0.0233772	0.00765577	0	0	0.025487	0.0233437	0.0204125	0.0182272	0.0166819
		electricity production, nuclear, boiling water reactor | electricity, high voltage | cut-off, U - SERC		0.0259615	0.0238124	0.0077983	0	0	0.0259615	0.0237784	0.0207925	0.0185666	0.0169925
		electricity production, nuclear, boiling water reactor | electricity, high voltage | cut-off, U - WECC, US only		0.0113392	0.0104005	0.00340606	0	0	0.0113392	0.0103856	0.00908154	0.00810931	0.0074218
		electricity production, nuclear, pressure water reactor | electricity, high voltage | cut-off, U - NPCC, US only		0.0145815	0.0133744	0.00437997	0	0	0.0145815	0.0133553	0.0116783	0.010428	0.00954395
		electricity production, nuclear, pressure water reactor | electricity, high voltage | cut-off, U - RFC		0.0499541	0.0458189	0.0150052	0	0	0.0499541	0.0457533	0.0400082	0.0357251	0.0326963
		electricity production, nuclear, pressure water reactor | electricity, high voltage | cut-off, U - SERC		0.0508852	0.0466729	0.0152848	0	0	0.0508852	0.0466061	0.0407538	0.0363909	0.0333057
		electricity production, oil | electricity, high voltage | cut-off, U - HICC		0.000930813	0.000619561	0.000155047	3.42338e-05	0	0.000930813	0.000618674	0.000221214	6.20648e-05	2.25945e-05
		electricity production, oil | electricity, high voltage | cut-off, U - MX		0.0105106	0.00699601	0.00175077	0.000386564	0	0.0105106	0.006986	0.00249792	0.000700828	0.000255134
		electricity production, oil | electricity, high voltage | cut-off, U - SERC		0.000666594	0.000443693	0.000111036	2.45162e-05	0	0.000666594	0.000443059	0.000158421	4.44472e-05	1.61808e-05
		electricity production, photovoltaic, 3kWp slanted-roof installation, multi-Si, panel, mounted | electricity, low voltage | cut-off, U - FRCC		0.000103839	0.000374944	0.00363178	0.00470175	0.00529884	0.000103839	0.000333008	0.000648712	0.000865285	0.00111856
		electricity production, photovoltaic, 3kWp slanted-roof installation, multi-Si, panel, mounted | electricity, low voltage | cut-off, U - RFC		0.000216985	0.000783494	0.00758906	0.0098249	0.0110726	0.000216985	0.000695862	0.00135557	0.00180812	0.00233737
		electricity production, photovoltaic, 3kWp slanted-roof installation, multi-Si, panel, mounted | electricity, low voltage | cut-off, U - WECC, US only		0.001533	0.00553538	0.0536166	0.0694128	0.0782278	0.001533	0.00491626	0.00957707	0.0127744	0.0165135
		electricity production, photovoltaic, 3kWp slanted-roof installation, single-Si, panel, mounted | electricity, low voltage | cut-off, U - FRCC		8.40602e-05	0.000303526	0.00294001	0.00380618	0.00428953	8.40602e-05	0.000269578	0.000525148	0.000700469	0.000905501
		electricity production, photovoltaic, 3kWp slanted-roof installation, single-Si, panel, mounted | electricity, low voltage | cut-off, U - RFC		0.000173588	0.000626795	0.00607124	0.00785992	0.00885807	0.000173588	0.00055669	0.00108445	0.0014465	0.0018699
		electricity production, photovoltaic, 3kWp slanted-roof installation, single-Si, panel, mounted | electricity, low voltage | cut-off, U - WECC, US only		0.0012164	0.0043922	0.0425436	0.0550776	0.062072	0.0012164	0.00390095	0.0075992	0.0101362	0.0131031
		electricity production, photovoltaic, 570kWp open ground installation, multi-Si | electricity, low voltage | cut-off, U - CA-ON		0.000407273	0.00147059	0.0142444	0.018441	0.0207829	0.000407273	0.00130611	0.00254435	0.00339378	0.00438717
		electricity production, photovoltaic, 570kWp open ground installation, multi-Si | electricity, low voltage | cut-off, U - RFC		0.00032686	0.00118023	0.0114319	0.0147999	0.0166794	0.00032686	0.00104823	0.00204199	0.0027237	0.00352095
		electricity production, photovoltaic, 570kWp open ground installation, multi-Si | electricity, low voltage | cut-off, U - WECC, US only		0.00259373	0.00936552	0.090716	0.117442	0.132357	0.00259373	0.00831801	0.0162038	0.0216134	0.0279399
		electricity production, wind, <1MW turbine, onshore | electricity, high voltage | cut-off, U - MRO, US only		0.0010322	0.00147534	0.00517489	0.00650108	0.00687949	0.0010322	0.00147323	0.00203699	0.00224626	0.00246709
		electricity production, wind, <1MW turbine, onshore | electricity, high voltage | cut-off, U - TRE		0.00101911	0.00145664	0.0051093	0.00641868	0.00679229	0.00101911	0.00145455	0.00201117	0.00221779	0.00243582
		electricity production, wind, <1MW turbine, onshore | electricity, high voltage | cut-off, U - WECC, US only		0.00125672	0.00179624	0.00630051	0.00791516	0.00837589	0.00125672	0.00179367	0.00248006	0.00273486	0.00300371
		electricity production, wind, >3MW turbine, onshore | electricity, high voltage | cut-off, U - MRO, US only		0.000105866	0.000151317	0.000530758	0.000666778	0.000705589	0.000105866	0.0001511	0.000208922	0.000230386	0.000253035
		electricity production, wind, >3MW turbine, onshore | electricity, high voltage | cut-off, U - TRE		0.000105096	0.000150216	0.000526896	0.000661926	0.000700455	0.000105096	0.000150001	0.000207401	0.00022871	0.000251193
		electricity production, wind, >3MW turbine, onshore | electricity, high voltage | cut-off, U - WECC, US only		0.000127751	0.000182597	0.000640477	0.000804615	0.000851449	0.000127751	0.000182336	0.00025211	0.000278012	0.000305342
		electricity production, wind, 1-3MW turbine, offshore | electricity, high voltage | cut-off, U - RoW		0	0.00125705	0.0416928	0.0819275	0.106424	0	0.00125525	0.000643122	0.00157566	0.00288416
		electricity production, wind, 1-3MW turbine, onshore | electricity, high voltage | cut-off, U - MRO, US only		0.0123144	0.0176012	0.0617378	0.0775596	0.0820741	0.0123144	0.017576	0.0243018	0.0267985	0.029433
		electricity production, wind, 1-3MW turbine, onshore | electricity, high voltage | cut-off, U - TRE		0.0121498	0.0173658	0.0609124	0.0765227	0.0809769	0.0121498	0.017341	0.0239769	0.0264402	0.0290395
		electricity production, wind, 1-3MW turbine, onshore | electricity, high voltage | cut-off, U - WECC, US only		0.0149974	0.021436	0.0751891	0.094458	0.0999562	0.0149974	0.0214054	0.0295966	0.0326373	0.0358458
		heat and power co-generation, biogas, gas engine | electricity, high voltage | cut-off, U - NPCC, US only		0.00236815	0.00276499	0.0032588	0.00370813	0.00396368	0.00236815	0.00276103	0.00293943	0.00314072	0.00337491
		heat and power co-generation, biogas, gas engine | electricity, high voltage | cut-off, U - RFC		0.00330987	0.00386452	0.0045547	0.00518271	0.00553988	0.00330987	0.00385899	0.00410832	0.00438965	0.00471697
		heat and power co-generation, biogas, gas engine | electricity, high voltage | cut-off, U - WECC, US only		0.0015048	0.00175697	0.00207075	0.00235627	0.00251865	0.0015048	0.00175445	0.00186781	0.00199571	0.00214453
		heat and power co-generation, hard coal | electricity, high voltage | cut-off, U - RoW		0.006259	0.00643036	0.00288881	0.000674369	0	0.006259	0.00642116	0.00360973	0.00241152	0.0019214
		heat and power co-generation, hydrogen, combined cycle power plant, 400MW electrical | electricity, high voltage | cut-off, U - RoW		0	0	0.000987198	0.00425864	0.0186954	0	0	0	0	0
		heat and power co-generation, lignite | electricity, high voltage | cut-off, U - RoW		0.00109764	0.000781801	0.000198653	0	0	0.00109764	0.000780683	0.000710732	0.000646772	0.000591939
		heat and power co-generation, natural gas, combined cycle power plant, 400MW electrical | electricity, high voltage | cut-off, U - SERC		0.00745816	0.00725118	0.00714909	0.00467342	0	0.00745816	0.0072408	0.00575582	0.00458314	0.00408156
		heat and power co-generation, natural gas, combined cycle power plant, 400MW electrical | electricity, high voltage | cut-off, U - TRE		0.00504945	0.00490932	0.0048402	0.00316408	0	0.00504945	0.00490229	0.0038969	0.00310296	0.00276337
		heat and power co-generation, natural gas, combined cycle power plant, 400MW electrical | electricity, high voltage | cut-off, U - WECC, US only		0.00590659	0.00574267	0.00566182	0.00370118	0	0.00590659	0.00573445	0.0045584	0.00362968	0.00323244
		heat and power co-generation, natural gas, conventional power plant, 100MW electrical | electricity, high voltage | cut-off, U - SERC		0.0125109	0.0121637	0.0119924	0.00783954	0	0.0125109	0.0121463	0.00965524	0.0076881	0.00684671
		heat and power co-generation, natural gas, conventional power plant, 100MW electrical | electricity, high voltage | cut-off, U - TRE		0.00847234	0.00823721	0.00812124	0.00530892	0	0.00847234	0.00822542	0.00653851	0.00520637	0.00463658
		heat and power co-generation, natural gas, conventional power plant, 100MW electrical | electricity, high voltage | cut-off, U - WECC, US only		0.00990376	0.00962891	0.00949335	0.00620588	0	0.00990376	0.00961513	0.00764321	0.006086	0.00541994
		heat and power co-generation, oil | electricity, high voltage | cut-off, U - HICC		0.00128256	0.000809622	0.000319224	0.000160186	0	0.00128256	0.000808464	0.000722881	0.000652199	0.000593042
		heat and power co-generation, oil | electricity, high voltage | cut-off, U - RFC		0.000534749	0.000337563	0.000133097	6.67877e-05	0	0.000534749	0.00033708	0.000301397	0.000271927	0.000247262
		heat and power co-generation, oil | electricity, high voltage | cut-off, U - SERC		0.000918285	0.000579671	0.000228557	0.00011469	0	0.000918285	0.000578841	0.000517566	0.00046696	0.000424604
		heat and power co-generation, wood chips, 6667 kW, state-of-the-art 2014 | electricity, high voltage | cut-off, U - CA-BC		0.0042782	0.00499512	0.00588721	0.00669896	0.00716063	0.0042782	0.00498797	0.00531025	0.00567389	0.00609697
		heat and power co-generation, wood chips, 6667 kW, state-of-the-art 2014 | electricity, high voltage | cut-off, U - NPCC, US only		0.00210481	0.00245753	0.00289643	0.0032958	0.00352293	0.00210481	0.00245401	0.00261257	0.00279147	0.00299962
		heat and power co-generation, wood chips, 6667 kW, state-of-the-art 2014 | electricity, high voltage | cut-off, U - WECC, US only		0.00240189	0.00280439	0.00330523	0.00376097	0.00402016	0.00240189	0.00280037	0.00298131	0.00318547	0.00342299
	OECD Pacific	electricity production CSP mix, electricity high voltage, cut-off, U - GLO	AU, JP, KR	0	5.20243e-06	0.0260908	0.061875	0.0765307	0	5.11601e-06	0.000803859	0.00160252	0.00238023
		electricity production, deep geothermal | electricity, high voltage | cut-off, U - JP		0.00532609	0.00766317	0.0413604	0.0554422	0.0548053	0.00532609	0.00797585	0.0153159	0.0224487	0.0314714
		electricity production, hard coal | electricity, high voltage | cut-off, U - AU		0.017089	0.0155939	0.00361998	0	0	0.017089	0.0169216	0.014495	0.0139674	0.0143538
		electricity production, hard coal | electricity, high voltage | cut-off, U - JP		0.169055	0.154265	0.0358112	0	0	0.169055	0.167399	0.143394	0.138174	0.141997
		electricity production, hard coal | electricity, high voltage | cut-off, U - KR		0.122076	0.111395	0.0258594	0	0	0.122076	0.12088	0.103545	0.099776	0.102536
		electricity production, hydro, pumped storage | electricity, high voltage | cut-off, U - AU		2.85843e-05	3.10178e-05	3.05876e-05	2.84421e-05	2.62144e-05	2.85843e-05	3.05026e-05	3.07474e-05	3.03905e-05	2.87832e-05
		electricity production, hydro, pumped storage | electricity, high voltage | cut-off, U - JP		0.00512227	0.00555835	0.00548126	0.00509678	0.00469759	0.00512227	0.00546602	0.0055099	0.00544595	0.00515791
		electricity production, hydro, pumped storage | electricity, high voltage | cut-off, U - KR		0.00231031	0.002507	0.00247223	0.00229882	0.00211877	0.00231031	0.00246536	0.00248515	0.0024563	0.00232639
		electricity production, hydro, reservoir, alpine region | electricity, high voltage | cut-off, U - JP		0.00947277	0.0102792	0.0101367	0.00942563	0.0086874	0.00947277	0.0101085	0.0101896	0.0100714	0.00953869
		electricity production, hydro, reservoir, non-alpine region | electricity, high voltage | cut-off, U - KR		0.000497886	0.000540274	0.00053278	0.000495409	0.000456608	0.000497886	0.000531299	0.000535564	0.000529348	0.000501351
		electricity production, hydro, run-of-river | electricity, high voltage | cut-off, U - AU		0.00701354	0.00761065	0.00750508	0.00697865	0.00643207	0.00701354	0.00748422	0.0075443	0.00745674	0.00706235
		electricity production, hydro, run-of-river | electricity, high voltage | cut-off, U - JP		0.0378973	0.0411237	0.0405533	0.0377087	0.0347553	0.0378973	0.0404406	0.0407652	0.0402921	0.038161
		electricity production, hydro, run-of-river | electricity, high voltage | cut-off, U - KR		0.00199155	0.0021611	0.00213112	0.00198164	0.00182643	0.00199155	0.0021252	0.00214226	0.00211739	0.0020054
		electricity production, hydrogen, combined cycle power plant | electricity, high voltage | cut-off, U - RoW		0	0	0	0.0154176	0.0489017	0	0	0	0	0
		electricity production, lignite | electricity, high voltage | cut-off, U - AU		0.0535869	0.0541993	0.021882	0	0	0.0535869	0.0532005	0.0493173	0.0466379	0.0402744
		electricity production, lignite | electricity, high voltage | cut-off, U - KR		0.00210846	0.00213256	0.000860983	0	0	0.00210846	0.00209326	0.00194047	0.00183504	0.00158466
		electricity production, natural gas, combined cycle power plant | electricity, high voltage | cut-off, U - AU		0.00475677	0.00315639	0.00241433	0.00117913	0	0.00475677	0.00323049	0.00279107	0.00272558	0.00244299
		electricity production, natural gas, combined cycle power plant | electricity, high voltage | cut-off, U - JP		0.116483	0.0772928	0.0591213	0.0288743	0	0.116483	0.0791073	0.068347	0.0667432	0.0598233
		electricity production, natural gas, combined cycle power plant | electricity, high voltage | cut-off, U - KR		0.0173228	0.0114947	0.00879229	0.00429408	0	0.0173228	0.0117645	0.0101643	0.00992579	0.00889669
		electricity production, natural gas, conventional power plant | electricity, high voltage | cut-off, U - AU		0.0209927	0.0139299	0.010655	0.00520379	0	0.0209927	0.0142569	0.0123176	0.0120286	0.0107815
		electricity production, natural gas, conventional power plant | electricity, high voltage | cut-off, U - JP		0.135743	0.090073	0.0688969	0.0336486	0	0.135743	0.0921875	0.079648	0.077779	0.069715
		electricity production, natural gas, conventional power plant | electricity, high voltage | cut-off, U - KR		0.0312786	0.0207552	0.0158756	0.00775352	0	0.0312786	0.0212424	0.018353	0.0179223	0.0160641
		electricity production, nuclear, boiling water reactor | electricity, high voltage | cut-off, U - JP		0.00797237	0.0165383	0.0081062	0	0	0.00797237	0.0162636	0.0201008	0.0196294	0.0185912
		electricity production, nuclear, pressure water reactor | electricity, high voltage | cut-off, U - JP		0.00351899	0.00729999	0.00357806	0	0	0.00351899	0.00717872	0.00887245	0.00866436	0.00820611
		electricity production, nuclear, pressure water reactor | electricity, high voltage | cut-off, U - KR		0.0678384	0.140728	0.0689772	0	0	0.0678384	0.13839	0.171042	0.16703	0.158196
		electricity production, nuclear, pressure water reactor, heavy water moderated | electricity, high voltage | cut-off, U - JP		4.4667e-05	9.26597e-05	4.54168e-05	0	0	4.4667e-05	9.11204e-05	0.000112619	0.000109978	0.000104161
		electricity production, nuclear, pressure water reactor, heavy water moderated | electricity, high voltage | cut-off, U - KR		0.0100956	0.0209429	0.0102651	0	0	0.0100956	0.020595	0.0254542	0.0248572	0.0235425
		electricity production, oil | electricity, high voltage | cut-off, U - AU		0.000894014	0.00038507	0.000147976	2.01407e-05	0	0.000894014	0.000386171	0.000166731	7.68844e-05	4.5703e-05
		electricity production, oil | electricity, high voltage | cut-off, U - JP		0.0559445	0.0240964	0.00925986	0.00126034	0	0.0559445	0.0241653	0.0104335	0.00481118	0.00285994
		electricity production, oil | electricity, high voltage | cut-off, U - KR		0.00477362	0.00205609	0.000790123	0.000107542	0	0.00477362	0.00206197	0.000890264	0.000410527	0.000244033
		electricity production, photovoltaic, 3kWp slanted-roof installation, multi-Si, panel, mounted | electricity, low voltage | cut-off, U - AU		0.00107887	0.0023743	0.00924134	0.0139884	0.0149184	0.00107887	0.00183193	0.00233567	0.00231656	0.00230358
		electricity production, photovoltaic, 3kWp slanted-roof installation, multi-Si, panel, mounted | electricity, low voltage | cut-off, U - JP		0.00536942	0.0118166	0.045993	0.0696184	0.0742471	0.00536942	0.00911727	0.0116243	0.0115292	0.0114646
		electricity production, photovoltaic, 3kWp slanted-roof installation, multi-Si, panel, mounted | electricity, low voltage | cut-off, U - KR		0.000196432	0.000432292	0.00168259	0.00254688	0.00271622	0.000196432	0.000333542	0.000425259	0.00042178	0.000419417
		electricity production, photovoltaic, 3kWp slanted-roof installation, single-Si, panel, mounted | electricity, low voltage | cut-off, U - AU		0.000862699	0.00189856	0.00738964	0.0111855	0.0119292	0.000862699	0.00146486	0.00186767	0.00185239	0.00184201
		electricity production, photovoltaic, 3kWp slanted-roof installation, single-Si, panel, mounted | electricity, low voltage | cut-off, U - JP		0.00436266	0.00960098	0.0373693	0.0565649	0.0603258	0.00436266	0.00740778	0.00944478	0.00936751	0.00931503
		electricity production, photovoltaic, 3kWp slanted-roof installation, single-Si, panel, mounted | electricity, low voltage | cut-off, U - KR		0.000163694	0.000360243	0.00140215	0.0021224	0.00226352	0.000163694	0.000277951	0.000354383	0.000351484	0.000349514
		electricity production, photovoltaic, 570kWp open ground installation, multi-Si | electricity, low voltage | cut-off, U - AU		0.000128085	0.000281879	0.00109714	0.00166072	0.00177113	0.000128085	0.000217488	0.000277294	0.000275025	0.000273484
		electricity production, photovoltaic, 570kWp open ground installation, multi-Si | electricity, low voltage | cut-off, U - JP		0.00286266	0.00629992	0.0245208	0.0371165	0.0395842	0.00286266	0.0048608	0.00619742	0.00614672	0.00611228
		electricity production, photovoltaic, 570kWp open ground installation, multi-Si | electricity, low voltage | cut-off, U - KR		0.00904303	0.0199012	0.0774601	0.117249	0.125045	0.00904303	0.015355	0.0195774	0.0194172	0.0193084
		electricity production, wind, <1MW turbine, onshore | electricity, high voltage | cut-off, U - AU		5.80002e-05	0.000132459	0.000803152	0.00125319	0.00137468	5.80002e-05	0.000118698	0.00019949	0.000264528	0.00034256
		electricity production, wind, <1MW turbine, onshore | electricity, high voltage | cut-off, U - JP		0.000607764	0.00138799	0.00841596	0.0131318	0.0144048	0.000607764	0.00124379	0.00209039	0.0027719	0.00358957
		electricity production, wind, <1MW turbine, onshore | electricity, high voltage | cut-off, U - KR		5.92911e-05	0.000135407	0.000821027	0.00128109	0.00140528	5.92911e-05	0.00012134	0.00020393	0.000270416	0.000350184
		electricity production, wind, >3MW turbine, onshore | electricity, high voltage | cut-off, U - AU		0.000226563	0.000517417	0.00313731	0.00489529	0.00536986	0.000226563	0.000463663	0.00077926	0.00103331	0.00133813
		electricity production, wind, >3MW turbine, onshore | electricity, high voltage | cut-off, U - JP		0.000529623	0.00120953	0.00733391	0.0114434	0.0125528	0.000529623	0.00108388	0.00182163	0.00241551	0.00312806
		electricity production, wind, >3MW turbine, onshore | electricity, high voltage | cut-off, U - KR		7.62314e-05	0.000174094	0.00105561	0.00164711	0.00180679	7.62314e-05	0.000156008	0.000262196	0.000347677	0.000450237
		electricity production, wind, 1-3MW turbine, offshore | electricity, high voltage | cut-off, U - JP		9.28255e-05	0.000394905	0.043406	0.0827061	0.0914086	9.28255e-05	0.000388345	0.00132892	0.00367885	0.00677371
		electricity production, wind, 1-3MW turbine, offshore | electricity, high voltage | cut-off, U - KR		9.89554e-06	4.20984e-05	0.00462723	0.00881677	0.00974449	9.89554e-06	4.1399e-05	0.000141668	0.000392179	0.000722102
		electricity production, wind, 1-3MW turbine, onshore | electricity, high voltage | cut-off, U - AU		0.00507502	0.0115901	0.0702758	0.109654	0.120285	0.00507502	0.0103861	0.0174554	0.0231462	0.029974
		electricity production, wind, 1-3MW turbine, onshore | electricity, high voltage | cut-off, U - JP		0.00297804	0.00680115	0.0412382	0.0643458	0.0705837	0.00297804	0.00609459	0.0102429	0.0135823	0.0175889
		electricity production, wind, 1-3MW turbine, onshore | electricity, high voltage | cut-off, U - KR		0.000656437	0.00149915	0.00908995	0.0141834	0.0155584	0.000656437	0.0013434	0.0022578	0.00299389	0.00387704
		heat and power co-generation, biogas, gas engine | electricity, high voltage | cut-off, U - AU		0.000804523	0.00120484	0.00228366	0.00225615	0.0023368	0.000804523	0.00101971	0.00133335	0.00135763	0.00138499
		heat and power co-generation, biogas, gas engine | electricity, high voltage | cut-off, U - KR		0.000377889	0.000565921	0.00107265	0.00105972	0.00109761	0.000377889	0.000478963	0.000626283	0.000637688	0.000650535
		heat and power co-generation, hard coal | electricity, high voltage | cut-off, U - KR		0.00392395	0.00446888	0.00387995	0.000731365	0	0.00392395	0.00470161	0.00545205	0.00673595	0.00739435
		heat and power co-generation, hydrogen, combined cycle power plant, 400MW electrical | electricity, high voltage | cut-off, U - RoW		0	0	0	0.00500552	0.018305	0	0	0	0	0
		heat and power co-generation, lignite | electricity, high voltage | cut-off, U - RoW		0.000991258	0.00090002	0	0	0	0.000991258	0.000982273	0.000756573	0.000629402	0.000418548
		heat and power co-generation, natural gas, combined cycle power plant, 400MW electrical | electricity, high voltage | cut-off, U - KR		0.00382731	0.00566622	0.00648272	0.00391679	0	0.00382731	0.00503968	0.00582694	0.00670602	0.00796817
		heat and power co-generation, natural gas, conventional power plant, 100MW electrical | electricity, high voltage | cut-off, U - AU		0.00578019	0.00855741	0.00979052	0.00591533	0	0.00578019	0.00761117	0.00880014	0.0101278	0.0120339
		heat and power co-generation, natural gas, conventional power plant, 100MW electrical | electricity, high voltage | cut-off, U - KR		0.0160625	0.0237801	0.0272068	0.016438	0	0.0160625	0.0211506	0.0244546	0.0281439	0.033441
		heat and power co-generation, oil | electricity, high voltage | cut-off, U - AU		0.000277066	0.00047569	0.000282323	0.00012039	0	0.000277066	0.000360165	0.000403801	0.000347724	0.00035663
		heat and power co-generation, oil | electricity, high voltage | cut-off, U - KR		0.00105317	0.00180818	0.00107316	0.000457624	0	0.00105317	0.00136905	0.00153492	0.00132176	0.00135561
		heat and power co-generation, wood chips, 6667 kW, state-of-the-art 2014 | electricity, high voltage | cut-off, U - AU		0.000764777	0.00114532	0.00217084	0.00214469	0.00222136	0.000764777	0.000969331	0.00126748	0.00129056	0.00131656
		heat and power co-generation, wood chips, 6667 kW, state-of-the-art 2014 | electricity, high voltage | cut-off, U - JP		0.0202213	0.0302831	0.0573987	0.0567072	0.0587344	0.0202213	0.0256299	0.0335132	0.0341235	0.0348109
		heat and power co-generation, wood chips, 6667 kW, state-of-the-art 2014 | electricity, high voltage | cut-off, U - KR		0.000265803	0.000398063	0.00075449	0.0007454	0.000772047	0.000265803	0.000336897	0.000440521	0.000448543	0.00045758
	Other Asia	electricity production CSP mix, electricity high voltage, cut-off, U - GLO	ID, MY, TH, TW	0	0.000559697	0.0552725	0.12543	0.176865	0	0	7.50001e-05	0.000180144	0.000295088
		electricity production, deep geothermal | electricity, high voltage | cut-off, U - ID		0.0154825	0.0152879	0.0500407	0.066586	0.0597694	0.0154825	0.0154853	0.0152036	0.0143255	0.0138048
		electricity production, deep geothermal | electricity, high voltage | cut-off, U - TH		1.71727e-06	1.69568e-06	5.55034e-06	7.38548e-06	6.62941e-06	1.71727e-06	1.71758e-06	1.68633e-06	1.58894e-06	1.53118e-06
		electricity production, hard coal | electricity, high voltage | cut-off, U - MY		0.0586223	0.0687484	0.0206847	0	0	0.0586223	0.0650477	0.105514	0.124366	0.133756
		electricity production, hard coal | electricity, high voltage | cut-off, U - TH		0.0166411	0.0195156	0.00587175	0	0	0.0166411	0.0184651	0.0299521	0.0353037	0.0379691
		electricity production, hard coal | electricity, high voltage | cut-off, U - TW		0.10391	0.121859	0.0366644	0	0	0.10391	0.1153	0.187027	0.220443	0.237087
		electricity production, hydro, pumped storage | electricity, high voltage | cut-off, U - TW		0.0081539	0.0090567	0.00657595	0.00410989	0.00301292	0.0081539	0.00909533	0.00967683	0.00857545	0.00783112
		electricity production, hydro, reservoir, tropical region | electricity, high voltage | cut-off, U - ID		0.0350332	0.0389121	0.0282536	0.0176581	0.012945	0.0350332	0.0390781	0.0415765	0.0368444	0.0336464
		electricity production, hydro, reservoir, tropical region | electricity, high voltage | cut-off, U - MY		0.0496647	0.0551635	0.0400535	0.0250329	0.0183514	0.0496647	0.0553988	0.0589407	0.0522323	0.0476986
		electricity production, hydro, reservoir, tropical region | electricity, high voltage | cut-off, U - TH		0.0243109	0.0270026	0.0196063	0.0122537	0.00898305	0.0243109	0.0271178	0.0288516	0.0255678	0.0233486
		electricity production, hydro, run-of-river | electricity, high voltage | cut-off, U - TW		0.0157198	0.0174603	0.0126777	0.00792342	0.00580858	0.0157198	0.0175348	0.0186559	0.0165325	0.0150976
		electricity production, hydrogen, combined cycle power plant | electricity, high voltage | cut-off, U - RoW		0	0	0	0	0	0	0	0	0	0
		electricity production, lignite | electricity, high voltage | cut-off, U - ID		0.0222998	0.0188955	0.00219018	0.000158257	0	0.0222998	0.0223442	0.0160719	0.0134103	0.011406
		electricity production, lignite | electricity, high voltage | cut-off, U - TH		0.088134	0.0746794	0.00865609	0.000625469	0	0.088134	0.0883094	0.0635197	0.0530006	0.045079
		electricity production, lignite | electricity, high voltage | cut-off, U - TW		0.0171037	0.0144926	0.00167984	0.000121381	0	0.0171037	0.0171377	0.0123269	0.0102855	0.00874824
		electricity production, natural gas, combined cycle power plant | electricity, high voltage | cut-off, U - ID		0.0381402	0.03519	0.0269529	0.012894	0.00408632	0.0381402	0.0347173	0.0273215	0.0258121	0.0249286
		electricity production, natural gas, combined cycle power plant | electricity, high voltage | cut-off, U - MY		0.0594706	0.0548704	0.0420266	0.0201051	0.00637164	0.0594706	0.0541333	0.0426014	0.0402478	0.0388702
		electricity production, natural gas, combined cycle power plant | electricity, high voltage | cut-off, U - TH		0.11748	0.108393	0.0830207	0.0397163	0.0125867	0.11748	0.106937	0.0841561	0.0795067	0.0767855
		electricity production, natural gas, conventional power plant | electricity, high voltage | cut-off, U - MY		0.0318441	0.0293809	0.0225036	0.0107655	0.00341176	0.0318441	0.0289862	0.0228113	0.0215511	0.0208135
		electricity production, natural gas, conventional power plant | electricity, high voltage | cut-off, U - TH		0.0540799	0.0498967	0.0382171	0.0182827	0.00579409	0.0540799	0.0492264	0.0387398	0.0365995	0.0353469
		electricity production, natural gas, conventional power plant | electricity, high voltage | cut-off, U - TW		0.0925741	0.0854134	0.0654202	0.0312964	0.00991834	0.0925741	0.0842659	0.0663149	0.0626512	0.0605069
		electricity production, nuclear, boiling water reactor | electricity, high voltage | cut-off, U - TW		0.0196889	0.0181145	0.00734144	0.00171132	0	0.0196889	0.0181918	0.010205	0.008249	0.006926
		electricity production, nuclear, pressure water reactor | electricity, high voltage | cut-off, U - TW		0.0115512	0.0106276	0.00430714	0.00100401	0	0.0115512	0.0106729	0.00598715	0.0048396	0.0040634
		electricity production, oil | electricity, high voltage | cut-off, U - ID		0.0546486	0.0469948	0.0110642	0.000833045	0	0.0546486	0.0496297	0.0212637	0.00942995	0.00415595
		electricity production, oil | electricity, high voltage | cut-off, U - MY		0.0100348	0.00862941	0.00203167	0.000152968	0	0.0100348	0.00911325	0.00390455	0.00173157	0.000763137
		electricity production, oil | electricity, high voltage | cut-off, U - TW		0.00953661	0.00820096	0.00193079	0.000145373	0	0.00953661	0.00866078	0.00371069	0.0016456	0.000725247
		electricity production, photovoltaic, 3kWp slanted-roof installation, multi-Si, panel, mounted | electricity, low voltage | cut-off, U - MY		4.89473e-05	0.000210436	0.00306845	0.00501677	0.0056773	4.89473e-05	8.29282e-05	0.000309535	0.000405914	0.000506518
		electricity production, photovoltaic, 3kWp slanted-roof installation, multi-Si, panel, mounted | electricity, low voltage | cut-off, U - TH		0.000507323	0.0021811	0.0318035	0.0519972	0.0588434	0.000507323	0.000859524	0.00320823	0.00420717	0.0052499
		electricity production, photovoltaic, 3kWp slanted-roof installation, multi-Si, panel, mounted | electricity, low voltage | cut-off, U - TW		0.000275639	0.00118504	0.0172795	0.0282511	0.0319708	0.000275639	0.000466997	0.0017431	0.00228584	0.00285238
		electricity production, photovoltaic, 3kWp slanted-roof installation, single-Si, panel, mounted | electricity, low voltage | cut-off, U - MY		3.91579e-05	0.000168349	0.00245476	0.00401341	0.00454184	3.91579e-05	6.63426e-05	0.000247628	0.000324731	0.000405215
		electricity production, photovoltaic, 3kWp slanted-roof installation, single-Si, panel, mounted | electricity, low voltage | cut-off, U - TH		0.000416369	0.00179006	0.0261017	0.042675	0.0482938	0.000416369	0.000705426	0.00263305	0.00345289	0.00430868
		electricity production, photovoltaic, 3kWp slanted-roof installation, single-Si, panel, mounted | electricity, low voltage | cut-off, U - TW		0.000225012	0.000967376	0.0141057	0.0230622	0.0260986	0.000225012	0.000381222	0.00142294	0.00186599	0.00232847
		electricity production, photovoltaic, 570kWp open ground installation, multi-Si | electricity, low voltage | cut-off, U - RoW		0.00151245	0.00650236	0.0948137	0.155016	0.175426	0.00151245	0.00256244	0.00956449	0.0125425	0.0156512
		electricity production, wind, <1MW turbine, onshore | electricity, high voltage | cut-off, U - ID		1.18808e-05	1.86922e-05	0.000414879	0.000675841	0.000845248	1.18808e-05	1.85116e-05	6.48556e-05	8.54005e-05	0.00010529
		electricity production, wind, <1MW turbine, onshore | electricity, high voltage | cut-off, U - TW		9.98194e-05	0.000157047	0.0034857	0.00567824	0.00710155	9.98194e-05	0.000155529	0.0005449	0.000717512	0.000884616
		electricity production, wind, 1-3MW turbine, offshore | electricity, high voltage | cut-off, U - RoW		2.93679e-05	0.000164617	0.0486212	0.0741035	0.0724183	2.93679e-05	9.91913e-05	0.000686843	0.00188588	0.00364569
		electricity production, wind, 1-3MW turbine, onshore | electricity, high voltage | cut-off, U - TW		0.00290585	0.0045718	0.101473	0.1653	0.206734	0.00290585	0.00452763	0.0158626	0.0208876	0.0257522
		heat and power co-generation, biogas, gas engine | electricity, high voltage | cut-off, U - MY		3.49493e-05	6.79287e-05	0.000111464	0.000114299	9.65225e-05	3.49493e-05	5.62039e-05	0.000104552	0.00011615	0.000128148
		heat and power co-generation, biogas, gas engine | electricity, high voltage | cut-off, U - TH		0.0001905	0.000370262	0.00060756	0.000623013	0.00052612	0.0001905	0.000306353	0.000569884	0.000633105	0.000698503
		heat and power co-generation, biogas, gas engine | electricity, high voltage | cut-off, U - TW		1.74139e-05	3.38462e-05	5.5538e-05	5.69506e-05	4.80934e-05	1.74139e-05	2.80042e-05	5.2094e-05	5.78731e-05	6.38512e-05
		heat and power co-generation, hard coal | electricity, high voltage | cut-off, U - RoW		0.0228409	0.0188387	0.00882963	4.52554e-05	0	0.0228409	0.0221329	0.0148184	0.0112055	0.00902215
		heat and power co-generation, hydrogen, combined cycle power plant, 400MW electrical | electricity, high voltage | cut-off, U - RoW		0	0	0	0	0	0	0	0	0	0
		heat and power co-generation, lignite | electricity, high voltage | cut-off, U - RoW		0.00250362	0.0019754	0.000539718	0	0	0.00250362	0.00255913	0.00167763	0.00130605	0.00113222
		heat and power co-generation, natural gas, conventional power plant, 100MW electrical | electricity, high voltage | cut-off, U - TW		0.00401606	0.00455	0.0227808	0.0159005	0.00757604	0.00401606	0.00438425	0.00371448	0.0034143	0.00323759
		heat and power co-generation, oil | electricity, high voltage | cut-off, U - TW		0.000822302	0.000678221	0.000504772	0	0	0.000822302	0.000681113	0.00031579	0.000121034	0
		heat and power co-generation, wood chips, 6667 kW | electricity, high voltage | cut-off, U - MY		0.00137001	0.00266281	0.00436938	0.00448051	0.00378368	0.00137001	0.00220319	0.00409842	0.00455309	0.0050234
		heat and power co-generation, wood chips, 6667 kW | electricity, high voltage | cut-off, U - TH		0.00744682	0.0144739	0.0237501	0.0243541	0.0205665	0.00744682	0.0119756	0.0222773	0.0247487	0.0273051
		heat and power co-generation, wood chips, 6667 kW | electricity, high voltage | cut-off, U - TW		0.000558303	0.00108514	0.00178059	0.00182588	0.00154191	0.000558303	0.000897837	0.00167017	0.00185546	0.00204712
	Global mix	electricity production CSP mix, electricity high voltage, cut-off, U - GLO	RoW	0.000387531	0.000980603	0.0374091	0.106384	0.136869	0.000387531	0.000899695	0.00168354	0.00307143	0.00530906
		electricity production, deep geothermal | electricity, high voltage | cut-off, U - RoW		0.00312746	0.00360818	0.0164651	0.0325716	0.0407724	0.00312746	0.00352283	0.004726	0.00613623	0.00811456
		electricity production, hard coal | electricity, high voltage | cut-off, U - RoW		0.24715	0.231746	0.0907356	0.0142268	0	0.24715	0.24179	0.24551	0.253998	0.242842
		electricity production, hydro, pumped storage | electricity, high voltage | cut-off, U - RoW		0.0237652	0.0234496	0.0194623	0.0144629	0.0117273	0.0237652	0.0233838	0.0223137	0.0209103	0.0201904
		electricity production, hydro, reservoir, alpine region | electricity, high voltage | cut-off, U - RoW		0.0195616	0.0193018	0.0160198	0.0119047	0.00965292	0.0195616	0.0192476	0.0183668	0.0172116	0.0166191
		electricity production, hydro, reservoir, non-alpine region | electricity, high voltage | cut-off, U - RoW		0.027836	0.0274663	0.022796	0.0169402	0.013736	0.027836	0.0273892	0.0261358	0.024492	0.0236489
		electricity production, hydro, reservoir, tropical region | electricity, high voltage | cut-off, U - RoW		0.0181572	0.0179161	0.0148697	0.01105	0.00895991	0.0181572	0.0178658	0.0170482	0.015976	0.015426
		electricity production, hydro, run-of-river | electricity, high voltage | cut-off, U - RoW		0.0709826	0.0700399	0.0581304	0.0431981	0.0350272	0.0709826	0.0698432	0.0666471	0.0624553	0.0603053
		electricity production, hydrogen, combined cycle power plant | electricity, high voltage | cut-off, U - RoW		0	0	0.00109189	0.00901872	0.0202821	0	0	0	0	0
		electricity production, lignite | electricity, high voltage | cut-off, U - RoW		0.0653291	0.0556033	0.00772712	0.00189797	0	0.0653291	0.0577966	0.0464684	0.0406805	0.0370051
		electricity production, natural gas, 10MW | electricity, high voltage | cut-off, U - RoW		8.72066e-08	8.19437e-08	6.47747e-08	2.42828e-08	0	8.72066e-08	8.36747e-08	9.14093e-08	9.90956e-08	1.02336e-07
		electricity production, natural gas, combined cycle power plant | electricity, high voltage | cut-off, U - RoW		0.0799895	0.0751621	0.059414	0.0222732	0	0.0799895	0.0767498	0.0838443	0.0908945	0.0938665
		electricity production, natural gas, conventional power plant | electricity, high voltage | cut-off, U - RoW		0.101438	0.0953163	0.0753454	0.0282456	0	0.101438	0.0973297	0.106327	0.115267	0.119036
		electricity production, nuclear, pressure water reactor | electricity, high voltage | cut-off, U - RoW		0.104907	0.107465	0.0428152	0.00366958	0	0.104907	0.109743	0.0998756	0.0904498	0.0861705
		electricity production, oil | electricity, high voltage | cut-off, U - RoW		0.0335631	0.0265263	0.00943242	0.000529242	0	0.0335631	0.0255221	0.0139954	0.00847693	0.00538179
		electricity production, photovoltaic, 3kWp slanted-roof installation, multi-Si, panel, mounted | electricity, low voltage | cut-off, U - RoW		0.00290962	0.00961684	0.0493954	0.0754986	0.0872674	0.00290962	0.00694772	0.0120946	0.0148342	0.0187617
		electricity production, photovoltaic, 3kWp slanted-roof installation, single-Si, panel, mounted | electricity, low voltage | cut-off, U - RoW		0.00217301	0.0071822	0.0368903	0.0563851	0.0651744	0.00217301	0.0051888	0.00903267	0.0110787	0.0140119
		electricity production, photovoltaic, 570kWp open ground installation, multi-Si | electricity, low voltage | cut-off, U - RoW		0.00508263	0.016799	0.0862857	0.131884	0.152442	0.00508263	0.0121365	0.0211273	0.025913	0.0327737
		electricity production, wind, >3MW turbine, onshore | electricity, high voltage | cut-off, U - RoW		0.033084	0.0522167	0.165672	0.235345	0.259103	0.033084	0.048712	0.0655955	0.0724098	0.0806492
		electricity production, wind, 1-3MW turbine, offshore | electricity, high voltage | cut-off, U - RoW		0.0014652	0.00255104	0.0368756	0.0758938	0.0841522	0.0014652	0.00242756	0.00473902	0.00699277	0.00901262
		heat and power co-generation, biogas, gas engine | electricity, high voltage | cut-off, U - RoW		9.18525e-05	0.000127738	0.000269471	0.000268945	0.00024915	9.18525e-05	0.000112769	0.000130574	0.000135611	0.000146424
		heat and power co-generation, diesel, 200kW electrical, SCR-NOx reduction | electricity, high voltage | cut-off, U - RoW		0.00501358	0.00378222	0.00148108	0.000299541	0	0.00501358	0.00448967	0.0038025	0.00333345	0.00313257
		heat and power co-generation, hard coal | electricity, high voltage | cut-off, U - RoW		0.0687435	0.0626556	0.0349005	0.0101402	0	0.0687435	0.063933	0.0509963	0.0415111	0.0346656
		heat and power co-generation, hydrogen, combined cycle power plant, 400MW electrical | electricity, high voltage | cut-off, U - RoW		0	0	0.000582227	0.00576979	0.0222165	0	0	0	0	0
		heat and power co-generation, lignite | electricity, high voltage | cut-off, U - RoW		0.00804209	0.00689697	0.000565786	0	0	0.00804209	0.00703061	0.00540214	0.00427512	0.00359365
		heat and power co-generation, natural gas, 200kW electrical, lean burn | electricity, high voltage | cut-off, U - RoW		0.047771	0.0475585	0.0504895	0.0306824	0	0.047771	0.045458	0.0396207	0.0349262	0.0328849
		heat and power co-generation, natural gas, combined cycle power plant, 400MW electrical | electricity, high voltage | cut-off, U - RoW		0.00153114	0.00152433	0.00161827	0.00098342	0	0.00153114	0.001457	0.0012699	0.00111944	0.00105401
		heat and power co-generation, natural gas, conventional power plant, 100MW electrical | electricity, high voltage | cut-off, U - RoW		0.0060196	0.00599283	0.00636215	0.00386628	0	0.0060196	0.00572814	0.00499258	0.00440103	0.00414381
		heat and power co-generation, oil | electricity, high voltage | cut-off, U - RoW		0.00257337	0.00166611	0.000259083	8.35646e-05	0	0.00257337	0.00159245	0.000810667	0.000546273	0.000479262
		heat and power co-generation, wood chips, 6667 kW | electricity, high voltage | cut-off, U - RoW		0.00326494	0.00454051	0.00957848	0.00955977	0.00885615	0.00326494	0.00400843	0.00464131	0.00482037	0.00520469
		heat and power co-generation, wood chips, 6667 kW, state-of-the-art 2014 | electricity, high voltage | cut-off, U - RoW		0.0160408	0.0223077	0.0470595	0.0469676	0.0435107	0.0160408	0.0196936	0.022803	0.0236827	0.0255709

## Sheet: assign4plot InNOSys - old
Technology	Output 1	Output 2	Output 3	Output 4	Subsector	Color Tech	Color Sector	CapInst	CapNew	CapNewSmooth	CapNewNet	CapDecom	CapDecomSmooth	Operation	CapNew+CapDecom+Oper	CapNewSm+CapDecomSm+Oper	CapNewSm+CapDecomSm+Oper+CapInst	Share_P_in_CHP
CHP_loc_Biogas	Output_Power_CHP_loc_Biogas	Output_Heat_CHP_loc_Biogas	no	no	CHP (local)	#REF!	CornflowerBlue	CapInst_CHP_loc_Biogas	CapNew_CHP_loc_Biogas	CapNewSmooth_CHP_loc_Biogas	CapNewNet_CHP_loc_Biogas	CapDecom_CHP_loc_Biogas	CapDecomSmooth_CHP_loc_Biogas	CHP_loc_Biogas	CHP_loc_Biogas	CHP_loc_Biogas	CHP_loc_Biogas	Share_P_in_CHP_loc_Biogas
CHP_loc_Bioliquids	Output_Power_CHP_loc_Bioliquids	Output_Heat_CHP_loc_Bioliquids	no	no	CHP (local)	#REF!	CornflowerBlue	CapInst_CHP_loc_Bioliquids	CapNew_CHP_loc_Bioliquids	CapNewSmooth_CHP_loc_Bioliquids	CapNewNet_CHP_loc_Bioliquids	CapDecom_CHP_loc_Bioliquids	CapDecomSmooth_CHP_loc_Bioliquids	CHP_loc_Bioliquids	CHP_loc_Bioliquids	CHP_loc_Bioliquids	CHP_loc_Bioliquids	Share_P_in_CHP_loc_Bioliquids
CHP_loc_Biomass	Output_Power_CHP_loc_Biomass	Output_Heat_CHP_loc_Biomass	no	no	CHP (local)	#REF!	CornflowerBlue	CapInst_CHP_loc_Biomass	CapNew_CHP_loc_Biomass	CapNewSmooth_CHP_loc_Biomass	CapNewNet_CHP_loc_Biomass	CapDecom_CHP_loc_Biomass	CapDecomSmooth_CHP_loc_Biomass	CHP_loc_Biomass	CHP_loc_Biomass	CHP_loc_Biomass	CHP_loc_Biomass	Share_P_in_CHP_loc_Biomass
CHP_loc_Gas	Output_Power_CHP_loc_Gas	Output_Heat_CHP_loc_Gas	no	no	CHP (local)	#REF!	CornflowerBlue	CapInst_CHP_loc_Gas	CapNew_CHP_loc_Gas	CapNewSmooth_CHP_loc_Gas	CapNewNet_CHP_loc_Gas	CapDecom_CHP_loc_Gas	CapDecomSmooth_CHP_loc_Gas	CHP_loc_Gas	CHP_loc_Gas	CHP_loc_Gas	CHP_loc_Gas	Share_P_in_CHP_loc_Gas
CHP_loc_GasFuelCell	Output_Power_CHP_loc_GasFuelCell	Output_Heat_CHP_loc_GasFuelCell	no	no	CHP (local)	#REF!	CornflowerBlue	CapInst_CHP_loc_GasFuelCell	CapNew_CHP_loc_GasFuelCell	CapNewSmooth_CHP_loc_GasFuelCell	CapNewNet_CHP_loc_GasFuelCell	CapDecom_CHP_loc_GasFuelCell	CapDecomSmooth_CHP_loc_GasFuelCell	CHP_loc_GasFuelCell	CHP_loc_GasFuelCell	CHP_loc_GasFuelCell	CHP_loc_GasFuelCell	Share_P_in_CHP_loc_GasFuelCell
CHP_loc_Geothermal	Output_Power_CHP_loc_Geothermal	Output_Heat_CHP_loc_Geothermal	no	no	CHP (local)	#REF!	CornflowerBlue	CapInst_CHP_loc_Geothermal	CapNew_CHP_loc_Geothermal	CapNewSmooth_CHP_loc_Geothermal	CapNewNet_CHP_loc_Geothermal	CapDecom_CHP_loc_Geothermal	CapDecomSmooth_CHP_loc_Geothermal	CHP_loc_Geothermal	CHP_loc_Geothermal	CHP_loc_Geothermal	CHP_loc_Geothermal	Share_P_in_CHP_loc_Geothermal
CHP_loc_H2FuelCell	Output_Power_CHP_loc_H2FuelCell	Output_Heat_CHP_loc_H2FuelCell	no	no	CHP (local)	#REF!	CornflowerBlue	CapInst_CHP_loc_H2FuelCell	CapNew_CHP_loc_H2FuelCell	CapNewSmooth_CHP_loc_H2FuelCell	CapNewNet_CHP_loc_H2FuelCell	CapDecom_CHP_loc_H2FuelCell	CapDecomSmooth_CHP_loc_H2FuelCell	CHP_loc_H2FuelCell	CHP_loc_H2FuelCell	CHP_loc_H2FuelCell	CHP_loc_H2FuelCell	Share_P_in_CHP_loc_H2FuelCell
CHP_loc_LandfillGas	Output_Power_CHP_loc_LandfillGas	Output_Heat_CHP_loc_LandfillGas	no	no	CHP (local)	#REF!	CornflowerBlue	CapInst_CHP_loc_LandfillGas	CapNew_CHP_loc_LandfillGas	CapNewSmooth_CHP_loc_LandfillGas	CapNewNet_CHP_loc_LandfillGas	CapDecom_CHP_loc_LandfillGas	CapDecomSmooth_CHP_loc_LandfillGas	CHP_loc_LandfillGas	CHP_loc_LandfillGas	CHP_loc_LandfillGas	CHP_loc_LandfillGas	Share_P_in_CHP_loc_LandfillGas
CHP_loc_Oil	Output_Power_CHP_loc_Oil	Output_Heat_CHP_loc_Oil	no	no	CHP (local)	#REF!	CornflowerBlue	CapInst_CHP_loc_Oil	CapNew_CHP_loc_Oil	CapNewSmooth_CHP_loc_Oil	CapNewNet_CHP_loc_Oil	CapDecom_CHP_loc_Oil	CapDecomSmooth_CHP_loc_Oil	CHP_loc_Oil	CHP_loc_Oil	CHP_loc_Oil	CHP_loc_Oil	Share_P_in_CHP_loc_Oil
CHP_reg_Biomass	Output_Power_CHP_reg_Biomass	Output_Heat_CHP_reg_Biomass	no	no	CHP (regional)	#REF!	RoyalBlue	CapInst_CHP_reg_Biomass	CapNew_CHP_reg_Biomass	CapNewSmooth_CHP_reg_Biomass	CapNewNet_CHP_reg_Biomass	CapDecom_CHP_reg_Biomass	CapDecomSmooth_CHP_reg_Biomass	CHP_reg_Biomass	CHP_reg_Biomass	CHP_reg_Biomass	CHP_reg_Biomass	Share_P_in_CHP_reg_Biomass
CHP_reg_Gas_CCS	Output_Power_CHP_reg_Gas_CCS	Output_Heat_CHP_reg_Gas_CCS	no	no	CHP (regional)	#REF!	RoyalBlue	CapInst_CHP_reg_Gas_CCS	CapNew_CHP_reg_Gas_CCS	CapNewSmooth_CHP_reg_Gas_CCS	CapNewNet_CHP_reg_Gas_CCS	CapDecom_CHP_reg_Gas_CCS	CapDecomSmooth_CHP_reg_Gas_CCS	CHP_reg_Gas_CCS	CHP_reg_Gas_CCS	CHP_reg_Gas_CCS	CHP_reg_Gas_CCS	Share_P_in_CHP_reg_Gas_CCS
CHP_reg_Gas_noCCS	Output_Power_CHP_reg_Gas_noCCS	Output_Heat_CHP_reg_Gas_noCCS	no	no	CHP (regional)	#REF!	RoyalBlue	CapInst_CHP_reg_Gas_noCCS	CapNew_CHP_reg_Gas_noCCS	CapNewSmooth_CHP_reg_Gas_noCCS	CapNewNet_CHP_reg_Gas_noCCS	CapDecom_CHP_reg_Gas_noCCS	CapDecomSmooth_CHP_reg_Gas_noCCS	CHP_reg_Gas_noCCS	CHP_reg_Gas_noCCS	CHP_reg_Gas_noCCS	CHP_reg_Gas_noCCS	Share_P_in_CHP_reg_Gas_noCCS
CHP_reg_HardCoal_CCS	Output_Power_CHP_reg_HardCoal_CCS	Output_Heat_CHP_reg_HardCoal_CCS	no	no	CHP (regional)	#REF!	RoyalBlue	CapInst_CHP_reg_HardCoal_CCS	CapNew_CHP_reg_HardCoal_CCS	CapNewSmooth_CHP_reg_HardCoal_CCS	CapNewNet_CHP_reg_HardCoal_CCS	CapDecom_CHP_reg_HardCoal_CCS	CapDecomSmooth_CHP_reg_HardCoal_CCS	CHP_reg_HardCoal_CCS	CHP_reg_HardCoal_CCS	CHP_reg_HardCoal_CCS	CHP_reg_HardCoal_CCS	Share_P_in_CHP_reg_HardCoal_CCS
CHP_reg_HardCoal_noCCS	Output_Power_CHP_reg_HardCoal_noCCS	Output_Heat_CHP_reg_HardCoal_noCCS	no	no	CHP (regional)	#REF!	RoyalBlue	CapInst_CHP_reg_HardCoal_noCCS	CapNew_CHP_reg_HardCoal_noCCS	CapNewSmooth_CHP_reg_HardCoal_noCCS	CapNewNet_CHP_reg_HardCoal_noCCS	CapDecom_CHP_reg_HardCoal_noCCS	CapDecomSmooth_CHP_reg_HardCoal_noCCS	CHP_reg_HardCoal_noCCS	CHP_reg_HardCoal_noCCS	CHP_reg_HardCoal_noCCS	CHP_reg_HardCoal_noCCS	Share_P_in_CHP_reg_HardCoal_noCCS
CHP_reg_Lignite_CCS	Output_Power_CHP_reg_Lignite_CCS	Output_Heat_CHP_reg_Lignite_CCS	no	no	CHP (regional)	#REF!	RoyalBlue	CapInst_CHP_reg_Lignite_CCS	CapNew_CHP_reg_Lignite_CCS	CapNewSmooth_CHP_reg_Lignite_CCS	CapNewNet_CHP_reg_Lignite_CCS	CapDecom_CHP_reg_Lignite_CCS	CapDecomSmooth_CHP_reg_Lignite_CCS	CHP_reg_Lignite_CCS	CHP_reg_Lignite_CCS	CHP_reg_Lignite_CCS	CHP_reg_Lignite_CCS	Share_P_in_CHP_reg_Lignite_CCS
CHP_reg_Lignite_noCCS	Output_Power_CHP_reg_Lignite_noCCS	Output_Heat_CHP_reg_Lignite_noCCS	no	no	CHP (regional)	#REF!	RoyalBlue	CapInst_CHP_reg_Lignite_noCCS	CapNew_CHP_reg_Lignite_noCCS	CapNewSmooth_CHP_reg_Lignite_noCCS	CapNewNet_CHP_reg_Lignite_noCCS	CapDecom_CHP_reg_Lignite_noCCS	CapDecomSmooth_CHP_reg_Lignite_noCCS	CHP_reg_Lignite_noCCS	CHP_reg_Lignite_noCCS	CHP_reg_Lignite_noCCS	CHP_reg_Lignite_noCCS	Share_P_in_CHP_reg_Lignite_noCCS
CHP_reg_Oil	Output_Power_CHP_reg_Oil	Output_Heat_CHP_reg_Oil	no	no	CHP (regional)	#REF!	RoyalBlue	CapInst_CHP_reg_Oil	CapNew_CHP_reg_Oil	CapNewSmooth_CHP_reg_Oil	CapNewNet_CHP_reg_Oil	CapDecom_CHP_reg_Oil	CapDecomSmooth_CHP_reg_Oil	CHP_reg_Oil	CHP_reg_Oil	CHP_reg_Oil	CHP_reg_Oil	Share_P_in_CHP_reg_Oil
CHP_reg_Waste	Output_Power_CHP_reg_Waste	Output_Heat_CHP_reg_Waste	no	no	CHP (regional)	#REF!	RoyalBlue	CapInst_CHP_reg_Waste	CapNew_CHP_reg_Waste	CapNewSmooth_CHP_reg_Waste	CapNewNet_CHP_reg_Waste	CapDecom_CHP_reg_Waste	CapDecomSmooth_CHP_reg_Waste	CHP_reg_Waste	CHP_reg_Waste	CHP_reg_Waste	CHP_reg_Waste	Share_P_in_CHP_reg_Waste
PP_Biogas	Output_Power_PP_Biogas	no	no	no	Power Plants	#REF!	Blue	CapInst_PP_Biogas	CapNew_PP_Biogas	CapNewSmooth_PP_Biogas	CapNewNet_PP_Biogas	CapDecom_PP_Biogas	CapDecomSmooth_PP_Biogas	PP_Biogas	PP_Biogas	PP_Biogas	PP_Biogas	no
PP_Bioliquids	Output_Power_PP_Bioliquids	no	no	no	Power Plants	#REF!	Blue	CapInst_PP_Bioliquids	CapNew_PP_Bioliquids	CapNewSmooth_PP_Bioliquids	CapNewNet_PP_Bioliquids	CapDecom_PP_Bioliquids	CapDecomSmooth_PP_Bioliquids	PP_Bioliquids	PP_Bioliquids	PP_Bioliquids	PP_Bioliquids	no
PP_Biomass	Output_Power_PP_Biomass	no	no	no	Power Plants	#REF!	Blue	CapInst_PP_Biomass	CapNew_PP_Biomass	CapNewSmooth_PP_Biomass	CapNewNet_PP_Biomass	CapDecom_PP_Biomass	CapDecomSmooth_PP_Biomass	PP_Biomass	PP_Biomass	PP_Biomass	PP_Biomass	no
PP_GasCC_CCS	Output_Power_PP_GasCC_CCS	no	no	no	Power Plants	#REF!	Blue	CapInst_PP_GasCC_CCS	CapNew_PP_GasCC_CCS	CapNewSmooth_PP_GasCC_CCS	CapNewNet_PP_GasCC_CCS	CapDecom_PP_GasCC_CCS	CapDecomSmooth_PP_GasCC_CCS	PP_GasCC_CCS	PP_GasCC_CCS	PP_GasCC_CCS	PP_GasCC_CCS	no
PP_GasCC_noCCS	Output_Power_PP_GasCC_noCCS	no	no	no	Power Plants	#REF!	Blue	CapInst_PP_GasCC_noCCS	CapNew_PP_GasCC_noCCS	CapNewSmooth_PP_GasCC_noCCS	CapNewNet_PP_GasCC_noCCS	CapDecom_PP_GasCC_noCCS	CapDecomSmooth_PP_GasCC_noCCS	PP_GasCC_noCCS	PP_GasCC_noCCS	PP_GasCC_noCCS	PP_GasCC_noCCS	no
PP_GasGT	Output_Power_PP_GasGT	no	no	no	Power Plants	#REF!	Blue	CapInst_PP_GasGT	CapNew_PP_GasGT	CapNewSmooth_PP_GasGT	CapNewNet_PP_GasGT	CapDecom_PP_GasGT	CapDecomSmooth_PP_GasGT	PP_GasGT	PP_GasGT	PP_GasGT	PP_GasGT	no
PP_Geothermal	Output_Power_PP_Geothermal	no	no	no	Power Plants	#REF!	Blue	CapInst_PP_Geothermal	CapNew_PP_Geothermal	CapNewSmooth_PP_Geothermal	CapNewNet_PP_Geothermal	CapDecom_PP_Geothermal	CapDecomSmooth_PP_Geothermal	PP_Geothermal	PP_Geothermal	PP_Geothermal	PP_Geothermal	no
PP_HardCoal_CCS	Output_Power_PP_HardCoal_CCS	no	no	no	Power Plants	#REF!	Blue	CapInst_PP_HardCoal_CCS	CapNew_PP_HardCoal_CCS	CapNewSmooth_PP_HardCoal_CCS	CapNewNet_PP_HardCoal_CCS	CapDecom_PP_HardCoal_CCS	CapDecomSmooth_PP_HardCoal_CCS	PP_HardCoal_CCS	PP_HardCoal_CCS	PP_HardCoal_CCS	PP_HardCoal_CCS	no
PP_HardCoal_noCCS	Output_Power_PP_HardCoal_noCCS	no	no	no	Power Plants	#REF!	Blue	CapInst_PP_HardCoal_noCCS	CapNew_PP_HardCoal_noCCS	CapNewSmooth_PP_HardCoal_noCCS	CapNewNet_PP_HardCoal_noCCS	CapDecom_PP_HardCoal_noCCS	CapDecomSmooth_PP_HardCoal_noCCS	PP_HardCoal_noCCS	PP_HardCoal_noCCS	PP_HardCoal_noCCS	PP_HardCoal_noCCS	no
PP_Hydro_medium	Output_Power_PP_Hydro_medium	no	no	no	Power Plants	#REF!	Blue	CapInst_PP_Hydro_medium	CapNew_PP_Hydro_medium	CapNewSmooth_PP_Hydro_medium	CapNewNet_PP_Hydro_medium	CapDecom_PP_Hydro_medium	CapDecomSmooth_PP_Hydro_medium	PP_Hydro_medium	PP_Hydro_medium	PP_Hydro_medium	PP_Hydro_medium	no
PP_Hydro_large	Output_Power_PP_Hydro_large	no	no	no	Power Plants	#REF!	Blue	CapInst_PP_Hydro_large	CapNew_PP_Hydro_large	CapNewSmooth_PP_Hydro_large	CapNewNet_PP_Hydro_large	CapDecom_PP_Hydro_large	CapDecomSmooth_PP_Hydro_large	PP_Hydro_large	PP_Hydro_large	PP_Hydro_large	PP_Hydro_large	no
PP_Hydro_small	Output_Power_PP_Hydro_small	no	no	no	Power Plants	#REF!	Blue	CapInst_PP_Hydro_small	CapNew_PP_Hydro_small	CapNewSmooth_PP_Hydro_small	CapNewNet_PP_Hydro_small	CapDecom_PP_Hydro_small	CapDecomSmooth_PP_Hydro_small	PP_Hydro_small	PP_Hydro_small	PP_Hydro_small	PP_Hydro_small	no
PP_LandfillGas	Output_Power_PP_LandfillGas	no	no	no	Power Plants	#REF!	Blue	CapInst_PP_LandfillGas	CapNew_PP_LandfillGas	CapNewSmooth_PP_LandfillGas	CapNewNet_PP_LandfillGas	CapDecom_PP_LandfillGas	CapDecomSmooth_PP_LandfillGas	PP_LandfillGas	PP_LandfillGas	PP_LandfillGas	PP_LandfillGas	no
PP_Lignite_CCS	Output_Power_PP_Lignite_CCS	no	no	no	Power Plants	#REF!	Blue	CapInst_PP_Lignite_CCS	CapNew_PP_Lignite_CCS	CapNewSmooth_PP_Lignite_CCS	CapNewNet_PP_Lignite_CCS	CapDecom_PP_Lignite_CCS	CapDecomSmooth_PP_Lignite_CCS	PP_Lignite_CCS	PP_Lignite_CCS	PP_Lignite_CCS	PP_Lignite_CCS	no
PP_Lignite_noCCS	Output_Power_PP_Lignite_noCCS	no	no	no	Power Plants	#REF!	Blue	CapInst_PP_Lignite_noCCS	CapNew_PP_Lignite_noCCS	CapNewSmooth_PP_Lignite_noCCS	CapNewNet_PP_Lignite_noCCS	CapDecom_PP_Lignite_noCCS	CapDecomSmooth_PP_Lignite_noCCS	PP_Lignite_noCCS	PP_Lignite_noCCS	PP_Lignite_noCCS	PP_Lignite_noCCS	no
PP_Nuclear	Output_Power_PP_Nuclear	no	no	no	Power Plants	#REF!	Blue	CapInst_PP_Nuclear	CapNew_PP_Nuclear	CapNewSmooth_PP_Nuclear	CapNewNet_PP_Nuclear	CapDecom_PP_Nuclear	CapDecomSmooth_PP_Nuclear	PP_Nuclear	PP_Nuclear	PP_Nuclear	PP_Nuclear	no
PP_Ocean	Output_Power_PP_Ocean	no	no	no	Power Plants	#REF!	Blue	CapInst_PP_Ocean	CapNew_PP_Ocean	CapNewSmooth_PP_Ocean	CapNewNet_PP_Ocean	CapDecom_PP_Ocean	CapDecomSmooth_PP_Ocean	PP_Ocean	PP_Ocean	PP_Ocean	PP_Ocean	no
PP_Oil	Output_Power_PP_Oil	no	no	no	Power Plants	#REF!	Blue	CapInst_PP_Oil	CapNew_PP_Oil	CapNewSmooth_PP_Oil	CapNewNet_PP_Oil	CapDecom_PP_Oil	CapDecomSmooth_PP_Oil	PP_Oil	PP_Oil	PP_Oil	PP_Oil	no
PP_PV_buildings	Output_Power_PP_PV_buildings	no	no	no	Power Plants	#REF!	Blue	CapInst_PP_PV_buildings	CapNew_PP_PV_buildings	CapNewSmooth_PP_PV_buildings	CapNewNet_PP_PV_buildings	CapDecom_PP_PV_buildings	CapDecomSmooth_PP_PV_buildings	PP_PV_buildings	PP_PV_buildings	PP_PV_buildings	PP_PV_buildings	no
PP_PV_power_station	Output_Power_PP_PV_power_station	no	no	no	Power Plants	#REF!	Blue	CapInst_PP_PV_power_station	CapNew_PP_PV_power_station	CapNewSmooth_PP_PV_power_station	CapNewNet_PP_PV_power_station	CapDecom_PP_PV_power_station	CapDecomSmooth_PP_PV_power_station	PP_PV_power_station	PP_PV_power_station	PP_PV_power_station	PP_PV_power_station	no
PP_Waste	Output_Power_PP_Waste	no	no	no	Power Plants	#REF!	Blue	CapInst_PP_Waste	CapNew_PP_Waste	CapNewSmooth_PP_Waste	CapNewNet_PP_Waste	CapDecom_PP_Waste	CapDecomSmooth_PP_Waste	PP_Waste	PP_Waste	PP_Waste	PP_Waste	no
PP_Wind_offshore	Output_Power_PP_Wind_offshore	no	no	no	Power Plants	#REF!	Blue	CapInst_PP_Wind_offshore	CapNew_PP_Wind_offshore	CapNewSmooth_PP_Wind_offshore	CapNewNet_PP_Wind_offshore	CapDecom_PP_Wind_offshore	CapDecomSmooth_PP_Wind_offshore	PP_Wind_offshore	PP_Wind_offshore	PP_Wind_offshore	PP_Wind_offshore	no
PP_Wind_onshore	Output_Power_PP_Wind_onshore	no	no	no	Power Plants	#REF!	Blue	CapInst_PP_Wind_onshore	CapNew_PP_Wind_onshore	CapNewSmooth_PP_Wind_onshore	CapNewNet_PP_Wind_onshore	CapDecom_PP_Wind_onshore	CapDecomSmooth_PP_Wind_onshore	PP_Wind_onshore	PP_Wind_onshore	PP_Wind_onshore	PP_Wind_onshore	no
CHP_RES_Biomass	Output_Power_CHP_RES_Biomass	Output_Heat_CHP_RES_Biomass	no	no	CHP (residential)	#REF!	PowderBlue	CapInst_CHP_RES_Biomass	CapNew_CHP_RES_Biomass	CapNewSmooth_CHP_RES_Biomass	CapNewNet_CHP_RES_Biomass	CapDecom_CHP_RES_Biomass	CapDecomSmooth_CHP_RES_Biomass	CHP_RES_Biomass	CHP_RES_Biomass	CHP_RES_Biomass	CHP_RES_Biomass	Share_P_in_CHP_RES_Biomass
CHP_RES_GasFuelCell	Output_Power_CHP_RES_GasFuelCell	Output_Heat_CHP_RES_GasFuelCell	no	no	CHP (residential)	#REF!	PowderBlue	CapInst_CHP_RES_GasFuelCell	CapNew_CHP_RES_GasFuelCell	CapNewSmooth_CHP_RES_GasFuelCell	CapNewNet_CHP_RES_GasFuelCell	CapDecom_CHP_RES_GasFuelCell	CapDecomSmooth_CHP_RES_GasFuelCell	CHP_RES_GasFuelCell	CHP_RES_GasFuelCell	CHP_RES_GasFuelCell	CHP_RES_GasFuelCell	Share_P_in_CHP_RES_GasFuelCell
CHP_RES_Gas	Output_Power_CHP_RES_Gas	Output_Heat_CHP_RES_Gas	no	no	CHP (residential)	#REF!	PowderBlue	CapInst_CHP_RES_Gas	CapNew_CHP_RES_Gas	CapNewSmooth_CHP_RES_Gas	CapNewNet_CHP_RES_Gas	CapDecom_CHP_RES_Gas	CapDecomSmooth_CHP_RES_Gas	CHP_RES_Gas	CHP_RES_Gas	CHP_RES_Gas	CHP_RES_Gas	Share_P_in_CHP_RES_Gas
CHP_IND_Biofuel	Output_Power_CHP_IND_Bioliquids	Output_Heat_CHP_IND_Bioliquids	no	no	CHP (industry)	#REF!	DeepSkyBlue	CapInst_CHP_IND_Biofuel	CapNew_CHP_IND_Biofuel	CapNewSmooth_CHP_IND_Biofuel	CapNewNet_CHP_IND_Biofuel	CapDecom_CHP_IND_Biofuel	CapDecomSmooth_CHP_IND_Biofuel	CHP_IND_Biofuel	CHP_IND_Biofuel	CHP_IND_Biofuel	CHP_IND_Biofuel	Share_P_in_CHP_IND_Biofuel
CHP_IND_Biogas	Output_Power_CHP_IND_Biogas	Output_Heat_CHP_IND_Biogas	no	no	CHP (industry)	#REF!	DeepSkyBlue	CapInst_CHP_IND_Biogas	CapNew_CHP_IND_Biogas	CapNewSmooth_CHP_IND_Biogas	CapNewNet_CHP_IND_Biogas	CapDecom_CHP_IND_Biogas	CapDecomSmooth_CHP_IND_Biogas	CHP_IND_Biogas	CHP_IND_Biogas	CHP_IND_Biogas	CHP_IND_Biogas	Share_P_in_CHP_IND_Biogas
CHP_IND_Biomass	Output_Power_CHP_IND_Biomass	Output_Heat_CHP_IND_Biomass	no	no	CHP (industry)	#REF!	DeepSkyBlue	CapInst_CHP_IND_Biomass	CapNew_CHP_IND_Biomass	CapNewSmooth_CHP_IND_Biomass	CapNewNet_CHP_IND_Biomass	CapDecom_CHP_IND_Biomass	CapDecomSmooth_CHP_IND_Biomass	CHP_IND_Biomass	CHP_IND_Biomass	CHP_IND_Biomass	CHP_IND_Biomass	Share_P_in_CHP_IND_Biomass
CHP_IND_Gas	Output_Power_CHP_IND_Gas	Output_Heat_CHP_IND_Gas	no	no	CHP (industry)	#REF!	DeepSkyBlue	CapInst_CHP_IND_Gas	CapNew_CHP_IND_Gas	CapNewSmooth_CHP_IND_Gas	CapNewNet_CHP_IND_Gas	CapDecom_CHP_IND_Gas	CapDecomSmooth_CHP_IND_Gas	CHP_IND_Gas	CHP_IND_Gas	CHP_IND_Gas	CHP_IND_Gas	Share_P_in_CHP_IND_Gas
CHP_IND_Gas_BHKW	Output_Power_CHP_IND_Gas_BHKW	Output_Heat_CHP_IND_Gas_BHKW	no	no	CHP (industry)	#REF!	DeepSkyBlue	CapInst_CHP_IND_Gas_BHKW	CapNew_CHP_IND_Gas_BHKW	CapNewSmooth_CHP_IND_Gas_BHKW	CapNewNet_CHP_IND_Gas_BHKW	CapDecom_CHP_IND_Gas_BHKW	CapDecomSmooth_CHP_IND_Gas_BHKW	CHP_IND_Gas_BHKW	CHP_IND_Gas_BHKW	CHP_IND_Gas_BHKW	CHP_IND_Gas_BHKW	Share_P_in_CHP_IND_Gas_BHKW
CHP_IND_GasFuelCell	Output_Power_CHP_IND_GasFuelCell	Output_Heat_CHP_IND_GasFuelCell	no	no	CHP (industry)	#REF!	DeepSkyBlue	CapInst_CHP_IND_GasFuelCell	CapNew_CHP_IND_GasFuelCell	CapNewSmooth_CHP_IND_GasFuelCell	CapNewNet_CHP_IND_GasFuelCell	CapDecom_CHP_IND_GasFuelCell	CapDecomSmooth_CHP_IND_GasFuelCell	CHP_IND_GasFuelCell	CHP_IND_GasFuelCell	CHP_IND_GasFuelCell	CHP_IND_GasFuelCell	Share_P_in_CHP_IND_GasFuelCell
CHP_IND_H2FuelCell	Output_Power_CHP_IND_H2FuelCell	Output_Heat_CHP_IND_H2FuelCell	no	no	CHP (industry)	#REF!	DeepSkyBlue	CapInst_CHP_IND_H2FuelCell	CapNew_CHP_IND_H2FuelCell	CapNewSmooth_CHP_IND_H2FuelCell	CapNewNet_CHP_IND_H2FuelCell	CapDecom_CHP_IND_H2FuelCell	CapDecomSmooth_CHP_IND_H2FuelCell	CHP_IND_H2FuelCell	CHP_IND_H2FuelCell	CHP_IND_H2FuelCell	CHP_IND_H2FuelCell	Share_P_in_CHP_IND_H2FuelCell
CHP_IND_HardCoal	Output_Power_CHP_IND_HardCoal	Output_Heat_CHP_IND_HardCoal	no	no	CHP (industry)	#REF!	DeepSkyBlue	CapInst_CHP_IND_HardCoal	CapNew_CHP_IND_HardCoal	CapNewSmooth_CHP_IND_HardCoal	CapNewNet_CHP_IND_HardCoal	CapDecom_CHP_IND_HardCoal	CapDecomSmooth_CHP_IND_HardCoal	CHP_IND_HardCoal	CHP_IND_HardCoal	CHP_IND_HardCoal	CHP_IND_HardCoal	Share_P_in_CHP_IND_HardCoal
CHP_IND_LandfillGas	Output_Power_CHP_IND_LandfillGas	Output_Heat_CHP_IND_LandfillGas	no	no	CHP (industry)	#REF!	DeepSkyBlue	CapInst_CHP_IND_LandfillGas	CapNew_CHP_IND_LandfillGas	CapNewSmooth_CHP_IND_LandfillGas	CapNewNet_CHP_IND_LandfillGas	CapDecom_CHP_IND_LandfillGas	CapDecomSmooth_CHP_IND_LandfillGas	CHP_IND_LandfillGas	CHP_IND_LandfillGas	CHP_IND_LandfillGas	CHP_IND_LandfillGas	Share_P_in_CHP_IND_LandfillGas
CHP_IND_Lignite	Output_Power_CHP_IND_Lignite	Output_Heat_CHP_IND_Lignite	no	no	CHP (industry)	#REF!	DeepSkyBlue	CapInst_CHP_IND_Lignite	CapNew_CHP_IND_Lignite	CapNewSmooth_CHP_IND_Lignite	CapNewNet_CHP_IND_Lignite	CapDecom_CHP_IND_Lignite	CapDecomSmooth_CHP_IND_Lignite	CHP_IND_Lignite	CHP_IND_Lignite	CHP_IND_Lignite	CHP_IND_Lignite	Share_P_in_CHP_IND_Lignite
CHP_IND_Oil	Output_Power_CHP_IND_Oil	Output_Heat_CHP_IND_Oil	no	no	CHP (industry)	#REF!	DeepSkyBlue	CapInst_CHP_IND_Oil	CapNew_CHP_IND_Oil	CapNewSmooth_CHP_IND_Oil	CapNewNet_CHP_IND_Oil	CapDecom_CHP_IND_Oil	CapDecomSmooth_CHP_IND_Oil	CHP_IND_Oil	CHP_IND_Oil	CHP_IND_Oil	CHP_IND_Oil	Share_P_in_CHP_IND_Oil
CHP_SV_Biofuel	Output_Power_CHP_SV_Bioliquids	Output_Heat_CHP_SV_Bioliquids	no	no	CHP (services)	#REF!	SkyBlue	CapInst_CHP_SV_Biofuel	CapNew_CHP_SV_Biofuel	CapNewSmooth_CHP_SV_Biofuel	CapNewNet_CHP_SV_Biofuel	CapDecom_CHP_SV_Biofuel	CapDecomSmooth_CHP_SV_Biofuel	CHP_SV_Biofuel	CHP_SV_Biofuel	CHP_SV_Biofuel	CHP_SV_Biofuel	Share_P_in_CHP_SV_Biofuel
CHP_SV_Biogas	Output_Power_CHP_SV_Biogas	Output_Heat_CHP_SV_Biogas	no	no	CHP (services)	#REF!	SkyBlue	CapInst_CHP_SV_Biogas	CapNew_CHP_SV_Biogas	CapNewSmooth_CHP_SV_Biogas	CapNewNet_CHP_SV_Biogas	CapDecom_CHP_SV_Biogas	CapDecomSmooth_CHP_SV_Biogas	CHP_SV_Biogas	CHP_SV_Biogas	CHP_SV_Biogas	CHP_SV_Biogas	Share_P_in_CHP_SV_Biogas
CHP_SV_Biomass	Output_Power_CHP_SV_Biomass	Output_Heat_CHP_SV_Biomass	no	no	CHP (services)	#REF!	SkyBlue	CapInst_CHP_SV_Biomass	CapNew_CHP_SV_Biomass	CapNewSmooth_CHP_SV_Biomass	CapNewNet_CHP_SV_Biomass	CapDecom_CHP_SV_Biomass	CapDecomSmooth_CHP_SV_Biomass	CHP_SV_Biomass	CHP_SV_Biomass	CHP_SV_Biomass	CHP_SV_Biomass	Share_P_in_CHP_SV_Biomass
CHP_SV_Gas	Output_Power_CHP_SV_Gas	Output_Heat_CHP_SV_Gas	no	no	CHP (services)	#REF!	SkyBlue	CapInst_CHP_SV_Gas	CapNew_CHP_SV_Gas	CapNewSmooth_CHP_SV_Gas	CapNewNet_CHP_SV_Gas	CapDecom_CHP_SV_Gas	CapDecomSmooth_CHP_SV_Gas	CHP_SV_Gas	CHP_SV_Gas	CHP_SV_Gas	CHP_SV_Gas	Share_P_in_CHP_SV_Gas
CHP_SV_GasFuelCell	Output_Power_CHP_SV_GasFuelCell	Output_Heat_CHP_SV_GasFuelCell	no	no	CHP (services)	#REF!	SkyBlue	CapInst_CHP_SV_GasFuelCell	CapNew_CHP_SV_GasFuelCell	CapNewSmooth_CHP_SV_GasFuelCell	CapNewNet_CHP_SV_GasFuelCell	CapDecom_CHP_SV_GasFuelCell	CapDecomSmooth_CHP_SV_GasFuelCell	CHP_SV_GasFuelCell	CHP_SV_GasFuelCell	CHP_SV_GasFuelCell	CHP_SV_GasFuelCell	Share_P_in_CHP_SV_GasFuelCell
CHP_SV_GasMicro	Output_Power_CHP_SV_GasMicro	Output_Heat_CHP_SV_GasMicro	no	no	CHP (services)	#REF!	SkyBlue	CapInst_CHP_SV_GasMicro	CapNew_CHP_SV_GasMicro	CapNewSmooth_CHP_SV_GasMicro	CapNewNet_CHP_SV_GasMicro	CapDecom_CHP_SV_GasMicro	CapDecomSmooth_CHP_SV_GasMicro	CHP_SV_GasMicro	CHP_SV_GasMicro	CHP_SV_GasMicro	CHP_SV_GasMicro	Share_P_in_CHP_SV_GasMicro
CHP_SV_H2FuelCell	Output_Power_CHP_SV_H2FuelCell	Output_Heat_CHP_SV_H2FuelCell	no	no	CHP (services)	#REF!	SkyBlue	CapInst_CHP_SV_H2FuelCell	CapNew_CHP_SV_H2FuelCell	CapNewSmooth_CHP_SV_H2FuelCell	CapNewNet_CHP_SV_H2FuelCell	CapDecom_CHP_SV_H2FuelCell	CapDecomSmooth_CHP_SV_H2FuelCell	CHP_SV_H2FuelCell	CHP_SV_H2FuelCell	CHP_SV_H2FuelCell	CHP_SV_H2FuelCell	Share_P_in_CHP_SV_H2FuelCell
CHP_SV_Oil	Output_Power_CHP_SV_Oil	Output_Heat_CHP_SV_Oil	no	no	CHP (services)	#REF!	SkyBlue	CapInst_CHP_SV_Oil	CapNew_CHP_SV_Oil	CapNewSmooth_CHP_SV_Oil	CapNewNet_CHP_SV_Oil	CapDecom_CHP_SV_Oil	CapDecomSmooth_CHP_SV_Oil	CHP_SV_Oil	CHP_SV_Oil	CHP_SV_Oil	CHP_SV_Oil	Share_P_in_CHP_SV_Oil
PStor_PHS	no	no	no	no	Power Storage	Teal	MediumSlateBlue	CapInst_PStor_PHS	CapNew_PStor_PHS	CapNewSmooth_PStor_PHS	CapNewNet_PStor_PHS	CapDecom_PStor_PHS	CapDecomSmooth_PStor_PHS	PStor_PHS	PStor_PHS	PStor_PHS	PStor_PHS	no
PStor_Li	no	no	no	no	Power Storage	LightSeaGreen	MediumSlateBlue	CapInst_PStor_Li	CapNew_PStor_Li	CapNewSmooth_PStor_Li	CapNewNet_PStor_Li	CapDecom_PStor_Li	CapDecomSmooth_PStor_Li	PStor_Li	PStor_Li	PStor_Li	PStor_Li	no
PStor_VRFB	no	no	no	no	Power Storage	SeaGreen	MediumSlateBlue	CapInst_PStor_VRFB	CapNew_PStor_VRFB	CapNewSmooth_PStor_VRFB	CapNewNet_PStor_VRFB	CapDecom_PStor_VRFB	CapDecomSmooth_PStor_VRFB	PStor_VRFB	PStor_VRFB	PStor_VRFB	PStor_VRFB	no
PStor_CAES	no	no	no	no	Power Storage	LimeGreen	MediumSlateBlue	CapInst_PStor_CAES	CapNew_PStor_CAES	CapNewSmooth_PStor_CAES	CapNewNet_PStor_CAES	CapDecom_PStor_CAES	CapDecomSmooth_PStor_CAES	PStor_CAES	PStor_CAES	PStor_CAES	PStor_CAES	no
PStorRes_PHS	no	no	no	no	Power Storage	Teal	MediumSlateBlue	CapInst_PStorRes_PHS	CapNew_PStorRes_PHS	CapNewSmooth_PStorRes_PHS	CapNewNet_PStorRes_PHS	CapDecom_PStorRes_PHS	CapDecomSmooth_PStorRes_PHS	PStorRes_PHS	PStorRes_PHS	PStorRes_PHS	PStorRes_PHS	no
PStorRes_Li	no	no	no	no	Power Storage	LightSeaGreen	MediumSlateBlue	CapInst_PStorRes_Li	CapNew_PStorRes_Li	CapNewSmooth_PStorRes_Li	CapNewNet_PStorRes_Li	CapDecom_PStorRes_Li	CapDecomSmooth_PStorRes_Li	PStorRes_Li	PStorRes_Li	PStorRes_Li	PStorRes_Li	no
PStorRes_VRFB	no	no	no	no	Power Storage	SeaGreen	MediumSlateBlue	CapInst_PStorRes_VRFB	CapNew_PStorRes_VRFB	CapNewSmooth_PStorRes_VRFB	CapNewNet_PStorRes_VRFB	CapDecom_PStorRes_VRFB	CapDecomSmooth_PStorRes_VRFB	PStorRes_VRFB	PStorRes_VRFB	PStorRes_VRFB	PStorRes_VRFB	no
PStorRes_CAES	no	no	no	no	Power Storage	LimeGreen	MediumSlateBlue	CapInst_PStorRes_CAES	CapNew_PStorRes_CAES	CapNewSmooth_PStorRes_CAES	CapNewNet_PStorRes_CAES	CapDecom_PStorRes_CAES	CapDecomSmooth_PStorRes_CAES	PStorRes_CAES	PStorRes_CAES	PStorRes_CAES	PStorRes_CAES	no
SHHW_IND_Biomass	Output_Heat_SHHW_IND_Biomass	no	no	no	Industry SH/HW	#REF!	DarkOrange	CapInst_SHHW_IND_Biomass	CapNew_SHHW_IND_Biomass	CapNewSmooth_SHHW_IND_Biomass	CapNewNet_SHHW_IND_Biomass	CapDecom_SHHW_IND_Biomass	CapDecomSmooth_SHHW_IND_Biomass	SHHW_IND_Biomass	SHHW_IND_Biomass	SHHW_IND_Biomass	SHHW_IND_Biomass	no
SHHW_IND_DistrictHeat	Output_Heat_SHHW_IND_DistrictHeat	no	no	no	Industry SH/HW	#REF!	DarkOrange	CapInst_SHHW_IND_DistrictHeat	CapNew_SHHW_IND_DistrictHeat	CapNewSmooth_SHHW_IND_DistrictHeat	CapNewNet_SHHW_IND_DistrictHeat	CapDecom_SHHW_IND_DistrictHeat	CapDecomSmooth_SHHW_IND_DistrictHeat	SHHW_IND_DistrictHeat	SHHW_IND_DistrictHeat	SHHW_IND_DistrictHeat	SHHW_IND_DistrictHeat	no
SHHW_IND_Electric	Output_Heat_SHHW_IND_Electric	no	no	no	Industry SH/HW	#REF!	DarkOrange	CapInst_SHHW_IND_Electric	CapNew_SHHW_IND_Electric	CapNewSmooth_SHHW_IND_Electric	CapNewNet_SHHW_IND_Electric	CapDecom_SHHW_IND_Electric	CapDecomSmooth_SHHW_IND_Electric	SHHW_IND_Electric	SHHW_IND_Electric	SHHW_IND_Electric	SHHW_IND_Electric	no
SHHW_IND_Gas	Output_Heat_SHHW_IND_Gas	no	no	no	Industry SH/HW	#REF!	DarkOrange	CapInst_SHHW_IND_Gas	CapNew_SHHW_IND_Gas	CapNewSmooth_SHHW_IND_Gas	CapNewNet_SHHW_IND_Gas	CapDecom_SHHW_IND_Gas	CapDecomSmooth_SHHW_IND_Gas	SHHW_IND_Gas	SHHW_IND_Gas	SHHW_IND_Gas	SHHW_IND_Gas	no
SHHW_IND_Geothermal	Output_Heat_SHHW_IND_Geothermal	no	no	no	Industry SH/HW	#REF!	DarkOrange	CapInst_SHHW_IND_Geothermal	CapNew_SHHW_IND_Geothermal	CapNewSmooth_SHHW_IND_Geothermal	CapNewNet_SHHW_IND_Geothermal	CapDecom_SHHW_IND_Geothermal	CapDecomSmooth_SHHW_IND_Geothermal	SHHW_IND_Geothermal	SHHW_IND_Geothermal	SHHW_IND_Geothermal	SHHW_IND_Geothermal	no
SHHW_IND_HardCoal	Output_Heat_SHHW_IND_HardCoal	no	no	no	Industry SH/HW	#REF!	DarkOrange	CapInst_SHHW_IND_HardCoal	CapNew_SHHW_IND_HardCoal	CapNewSmooth_SHHW_IND_HardCoal	CapNewNet_SHHW_IND_HardCoal	CapDecom_SHHW_IND_HardCoal	CapDecomSmooth_SHHW_IND_HardCoal	SHHW_IND_HardCoal	SHHW_IND_HardCoal	SHHW_IND_HardCoal	SHHW_IND_HardCoal	no
SHHW_IND_HeatPump	Output_Heat_SHHW_IND_HeatPump	no	no	no	Industry SH/HW	#REF!	DarkOrange	CapInst_SHHW_IND_HeatPump	CapNew_SHHW_IND_HeatPump	CapNewSmooth_SHHW_IND_HeatPump	CapNewNet_SHHW_IND_HeatPump	CapDecom_SHHW_IND_HeatPump	CapDecomSmooth_SHHW_IND_HeatPump	SHHW_IND_HeatPump	SHHW_IND_HeatPump	SHHW_IND_HeatPump	SHHW_IND_HeatPump	no
SHHW_IND_Lignite	Output_Heat_SHHW_IND_Lignite	no	no	no	Industry SH/HW	#REF!	DarkOrange	CapInst_SHHW_IND_Lignite	CapNew_SHHW_IND_Lignite	CapNewSmooth_SHHW_IND_Lignite	CapNewNet_SHHW_IND_Lignite	CapDecom_SHHW_IND_Lignite	CapDecomSmooth_SHHW_IND_Lignite	SHHW_IND_Lignite	SHHW_IND_Lignite	SHHW_IND_Lignite	SHHW_IND_Lignite	no
SHHW_IND_Oil	Output_Heat_SHHW_IND_Oil	no	no	no	Industry SH/HW	#REF!	DarkOrange	CapInst_SHHW_IND_Oil	CapNew_SHHW_IND_Oil	CapNewSmooth_SHHW_IND_Oil	CapNewNet_SHHW_IND_Oil	CapDecom_SHHW_IND_Oil	CapDecomSmooth_SHHW_IND_Oil	SHHW_IND_Oil	SHHW_IND_Oil	SHHW_IND_Oil	SHHW_IND_Oil	no
SHHW_IND_Solar	Output_Heat_SHHW_IND_Solar	no	no	no	Industry SH/HW	#REF!	DarkOrange	CapInst_SHHW_IND_Solar	CapNew_SHHW_IND_Solar	CapNewSmooth_SHHW_IND_Solar	CapNewNet_SHHW_IND_Solar	CapDecom_SHHW_IND_Solar	CapDecomSmooth_SHHW_IND_Solar	SHHW_IND_Solar	SHHW_IND_Solar	SHHW_IND_Solar	SHHW_IND_Solar	no
PH_IND_Biomass	Output_Heat_PH_IND_Biomass	no	no	no	Industry PH	#REF!	DarkRed	CapInst_PH_IND_Biomass	CapNew_PH_IND_Biomass	CapNewSmooth_PH_IND_Biomass	CapNewNet_PH_IND_Biomass	CapDecom_PH_IND_Biomass	CapDecomSmooth_PH_IND_Biomass	PH_IND_Biomass	PH_IND_Biomass	PH_IND_Biomass	PH_IND_Biomass	no
PH_IND_CoalProducts	Output_Heat_PH_IND_CoalProducts	no	no	no	Industry PH	#REF!	DarkRed	CapInst_PH_IND_CoalProducts	CapNew_PH_IND_CoalProducts	CapNewSmooth_PH_IND_CoalProducts	CapNewNet_PH_IND_CoalProducts	CapDecom_PH_IND_CoalProducts	CapDecomSmooth_PH_IND_CoalProducts	PH_IND_CoalProducts	PH_IND_CoalProducts	PH_IND_CoalProducts	PH_IND_CoalProducts	no
PH_IND_DistrictHeat	Output_Heat_PH_IND_DistrictHeat	no	no	no	Industry PH	#REF!	DarkRed	CapInst_PH_IND_DistrictHeat	CapNew_PH_IND_DistrictHeat	CapNewSmooth_PH_IND_DistrictHeat	CapNewNet_PH_IND_DistrictHeat	CapDecom_PH_IND_DistrictHeat	CapDecomSmooth_PH_IND_DistrictHeat	PH_IND_DistrictHeat	PH_IND_DistrictHeat	PH_IND_DistrictHeat	PH_IND_DistrictHeat	no
PH_IND_Electric	Output_Heat_PH_IND_Electric	no	no	no	Industry PH	#REF!	DarkRed	CapInst_PH_IND_Electric	CapNew_PH_IND_Electric	CapNewSmooth_PH_IND_Electric	CapNewNet_PH_IND_Electric	CapDecom_PH_IND_Electric	CapDecomSmooth_PH_IND_Electric	PH_IND_Electric	PH_IND_Electric	PH_IND_Electric	PH_IND_Electric	no
PH_IND_Gas	Output_Heat_PH_IND_Gas	no	no	no	Industry PH	#REF!	DarkRed	CapInst_PH_IND_Gas	CapNew_PH_IND_Gas	CapNewSmooth_PH_IND_Gas	CapNewNet_PH_IND_Gas	CapDecom_PH_IND_Gas	CapDecomSmooth_PH_IND_Gas	PH_IND_Gas	PH_IND_Gas	PH_IND_Gas	PH_IND_Gas	no
PH_IND_Geothermal	Output_Heat_PH_IND_Geothermal	no	no	no	Industry PH	#REF!	DarkRed	CapInst_PH_IND_Geothermal	CapNew_PH_IND_Geothermal	CapNewSmooth_PH_IND_Geothermal	CapNewNet_PH_IND_Geothermal	CapDecom_PH_IND_Geothermal	CapDecomSmooth_PH_IND_Geothermal	PH_IND_Geothermal	PH_IND_Geothermal	PH_IND_Geothermal	PH_IND_Geothermal	no
PH_IND_H2	Output_Heat_PH_IND_H2	no	no	no	Industry PH	#REF!	DarkRed	CapInst_PH_IND_H2	CapNew_PH_IND_H2	CapNewSmooth_PH_IND_H2	CapNewNet_PH_IND_H2	CapDecom_PH_IND_H2	CapDecomSmooth_PH_IND_H2	PH_IND_H2	PH_IND_H2	PH_IND_H2	PH_IND_H2	no
PH_IND_HardCoal	Output_Heat_PH_IND_HardCoal	no	no	no	Industry PH	#REF!	DarkRed	CapInst_PH_IND_HardCoal	CapNew_PH_IND_HardCoal	CapNewSmooth_PH_IND_HardCoal	CapNewNet_PH_IND_HardCoal	CapDecom_PH_IND_HardCoal	CapDecomSmooth_PH_IND_HardCoal	PH_IND_HardCoal	PH_IND_HardCoal	PH_IND_HardCoal	PH_IND_HardCoal	no
PH_IND_HeatPump	Output_Heat_PH_IND_HeatPump	no	no	no	Industry PH	#REF!	DarkRed	CapInst_PH_IND_HeatPump	CapNew_PH_IND_HeatPump	CapNewSmooth_PH_IND_HeatPump	CapNewNet_PH_IND_HeatPump	CapDecom_PH_IND_HeatPump	CapDecomSmooth_PH_IND_HeatPump	PH_IND_HeatPump	PH_IND_HeatPump	PH_IND_HeatPump	PH_IND_HeatPump	no
PH_IND_Lignite	Output_Heat_PH_IND_Lignite	no	no	no	Industry PH	#REF!	DarkRed	CapInst_PH_IND_Lignite	CapNew_PH_IND_Lignite	CapNewSmooth_PH_IND_Lignite	CapNewNet_PH_IND_Lignite	CapDecom_PH_IND_Lignite	CapDecomSmooth_PH_IND_Lignite	PH_IND_Lignite	PH_IND_Lignite	PH_IND_Lignite	PH_IND_Lignite	no
PH_IND_Oil	Output_Heat_PH_IND_Oil	no	no	no	Industry PH	#REF!	DarkRed	CapInst_PH_IND_Oil	CapNew_PH_IND_Oil	CapNewSmooth_PH_IND_Oil	CapNewNet_PH_IND_Oil	CapDecom_PH_IND_Oil	CapDecomSmooth_PH_IND_Oil	PH_IND_Oil	PH_IND_Oil	PH_IND_Oil	PH_IND_Oil	no
PH_IND_OilProducts	Output_Heat_PH_IND_OilProducts	no	no	no	Industry PH	#REF!	DarkRed	CapInst_PH_IND_OilProducts	CapNew_PH_IND_OilProducts	CapNewSmooth_PH_IND_OilProducts	CapNewNet_PH_IND_OilProducts	CapDecom_PH_IND_OilProducts	CapDecomSmooth_PH_IND_OilProducts	PH_IND_OilProducts	PH_IND_OilProducts	PH_IND_OilProducts	PH_IND_OilProducts	no
PH_IND_Solar	Output_Heat_PH_IND_Solar	no	no	no	Industry PH	#REF!	DarkRed	CapInst_PH_IND_Solar	CapNew_PH_IND_Solar	CapNewSmooth_PH_IND_Solar	CapNewNet_PH_IND_Solar	CapDecom_PH_IND_Solar	CapDecomSmooth_PH_IND_Solar	PH_IND_Solar	PH_IND_Solar	PH_IND_Solar	PH_IND_Solar	no
SHHW_SV_Biogas	Output_Heat_SHHW_SV_Biogas	no	no	no	Services SH/HW	#REF!	LightSalmon	CapInst_SHHW_SV_Biogas	CapNew_SHHW_SV_Biogas	CapNewSmooth_SHHW_SV_Biogas	CapNewNet_SHHW_SV_Biogas	CapDecom_SHHW_SV_Biogas	CapDecomSmooth_SHHW_SV_Biogas	SHHW_SV_Biogas	SHHW_SV_Biogas	SHHW_SV_Biogas	SHHW_SV_Biogas	no
SHHW_SV_Biomass	Output_Heat_SHHW_SV_Biomass	no	no	no	Services SH/HW	#REF!	LightSalmon	CapInst_SHHW_SV_Biomass	CapNew_SHHW_SV_Biomass	CapNewSmooth_SHHW_SV_Biomass	CapNewNet_SHHW_SV_Biomass	CapDecom_SHHW_SV_Biomass	CapDecomSmooth_SHHW_SV_Biomass	SHHW_SV_Biomass	SHHW_SV_Biomass	SHHW_SV_Biomass	SHHW_SV_Biomass	no
SHHW_SV_DistrictHeat	Output_Heat_SHHW_SV_DistrictHeat	no	no	no	Services SH/HW	#REF!	LightSalmon	CapInst_SHHW_SV_DistrictHeat	CapNew_SHHW_SV_DistrictHeat	CapNewSmooth_SHHW_SV_DistrictHeat	CapNewNet_SHHW_SV_DistrictHeat	CapDecom_SHHW_SV_DistrictHeat	CapDecomSmooth_SHHW_SV_DistrictHeat	SHHW_SV_DistrictHeat	SHHW_SV_DistrictHeat	SHHW_SV_DistrictHeat	SHHW_SV_DistrictHeat	no
SHHW_SV_Electric	Output_Heat_SHHW_SV_Electric	no	no	no	Services SH/HW	#REF!	LightSalmon	CapInst_SHHW_SV_Electric	CapNew_SHHW_SV_Electric	CapNewSmooth_SHHW_SV_Electric	CapNewNet_SHHW_SV_Electric	CapDecom_SHHW_SV_Electric	CapDecomSmooth_SHHW_SV_Electric	SHHW_SV_Electric	SHHW_SV_Electric	SHHW_SV_Electric	SHHW_SV_Electric	no
SHHW_SV_Gas	Output_Heat_SHHW_SV_Gas	no	no	no	Services SH/HW	#REF!	LightSalmon	CapInst_SHHW_SV_Gas	CapNew_SHHW_SV_Gas	CapNewSmooth_SHHW_SV_Gas	CapNewNet_SHHW_SV_Gas	CapDecom_SHHW_SV_Gas	CapDecomSmooth_SHHW_SV_Gas	SHHW_SV_Gas	SHHW_SV_Gas	SHHW_SV_Gas	SHHW_SV_Gas	no
SHHW_SV_Geothermal	Output_Heat_SHHW_SV_Geothermal	no	no	no	Services SH/HW	#REF!	LightSalmon	CapInst_SHHW_SV_Geothermal	CapNew_SHHW_SV_Geothermal	CapNewSmooth_SHHW_SV_Geothermal	CapNewNet_SHHW_SV_Geothermal	CapDecom_SHHW_SV_Geothermal	CapDecomSmooth_SHHW_SV_Geothermal	SHHW_SV_Geothermal	SHHW_SV_Geothermal	SHHW_SV_Geothermal	SHHW_SV_Geothermal	no
SHHW_SV_HardCoal	Output_Heat_SHHW_SV_HardCoal	no	no	no	Services SH/HW	#REF!	LightSalmon	CapInst_SHHW_SV_HardCoal	CapNew_SHHW_SV_HardCoal	CapNewSmooth_SHHW_SV_HardCoal	CapNewNet_SHHW_SV_HardCoal	CapDecom_SHHW_SV_HardCoal	CapDecomSmooth_SHHW_SV_HardCoal	SHHW_SV_HardCoal	SHHW_SV_HardCoal	SHHW_SV_HardCoal	SHHW_SV_HardCoal	no
SHHW_SV_HeatPump	Output_Heat_SHHW_SV_HeatPump	no	no	no	Services SH/HW	#REF!	LightSalmon	CapInst_SHHW_SV_HeatPump	CapNew_SHHW_SV_HeatPump	CapNewSmooth_SHHW_SV_HeatPump	CapNewNet_SHHW_SV_HeatPump	CapDecom_SHHW_SV_HeatPump	CapDecomSmooth_SHHW_SV_HeatPump	SHHW_SV_HeatPump	SHHW_SV_HeatPump	SHHW_SV_HeatPump	SHHW_SV_HeatPump	no
SHHW_SV_Oil	Output_Heat_SHHW_SV_Oil	no	no	no	Services SH/HW	#REF!	LightSalmon	CapInst_SHHW_SV_Oil	CapNew_SHHW_SV_Oil	CapNewSmooth_SHHW_SV_Oil	CapNewNet_SHHW_SV_Oil	CapDecom_SHHW_SV_Oil	CapDecomSmooth_SHHW_SV_Oil	SHHW_SV_Oil	SHHW_SV_Oil	SHHW_SV_Oil	SHHW_SV_Oil	no
SHHW_SV_Solar	Output_Heat_SHHW_SV_Solar	no	no	no	Services SH/HW	#REF!	LightSalmon	CapInst_SHHW_SV_Solar	CapNew_SHHW_SV_Solar	CapNewSmooth_SHHW_SV_Solar	CapNewNet_SHHW_SV_Solar	CapDecom_SHHW_SV_Solar	CapDecomSmooth_SHHW_SV_Solar	SHHW_SV_Solar	SHHW_SV_Solar	SHHW_SV_Solar	SHHW_SV_Solar	no
PH_SV_Biomass	Output_Heat_PH_SV_Biomass	no	no	no	Services PH	#REF!	FireBrick	CapInst_PH_SV_Biomass	CapNew_PH_SV_Biomass	CapNewSmooth_PH_SV_Biomass	CapNewNet_PH_SV_Biomass	CapDecom_PH_SV_Biomass	CapDecomSmooth_PH_SV_Biomass	PH_SV_Biomass	PH_SV_Biomass	PH_SV_Biomass	PH_SV_Biomass	no
PH_SV_DistrictHeat	Output_Heat_PH_SV_DistrictHeat	no	no	no	Services PH	#REF!	FireBrick	CapInst_PH_SV_DistrictHeat	CapNew_PH_SV_DistrictHeat	CapNewSmooth_PH_SV_DistrictHeat	CapNewNet_PH_SV_DistrictHeat	CapDecom_PH_SV_DistrictHeat	CapDecomSmooth_PH_SV_DistrictHeat	PH_SV_DistrictHeat	PH_SV_DistrictHeat	PH_SV_DistrictHeat	PH_SV_DistrictHeat	no
PH_SV_Electric	Output_Heat_PH_SV_Electric	no	no	no	Services PH	#REF!	FireBrick	CapInst_PH_SV_Electric	CapNew_PH_SV_Electric	CapNewSmooth_PH_SV_Electric	CapNewNet_PH_SV_Electric	CapDecom_PH_SV_Electric	CapDecomSmooth_PH_SV_Electric	PH_SV_Electric	PH_SV_Electric	PH_SV_Electric	PH_SV_Electric	no
PH_SV_Gas	Output_Heat_PH_SV_Gas	no	no	no	Services PH	#REF!	FireBrick	CapInst_PH_SV_Gas	CapNew_PH_SV_Gas	CapNewSmooth_PH_SV_Gas	CapNewNet_PH_SV_Gas	CapDecom_PH_SV_Gas	CapDecomSmooth_PH_SV_Gas	PH_SV_Gas	PH_SV_Gas	PH_SV_Gas	PH_SV_Gas	no
PH_SV_Geothermal	Output_Heat_PH_SV_Geothermal	no	no	no	Services PH	#REF!	FireBrick	CapInst_PH_SV_Geothermal	CapNew_PH_SV_Geothermal	CapNewSmooth_PH_SV_Geothermal	CapNewNet_PH_SV_Geothermal	CapDecom_PH_SV_Geothermal	CapDecomSmooth_PH_SV_Geothermal	PH_SV_Geothermal	PH_SV_Geothermal	PH_SV_Geothermal	PH_SV_Geothermal	no
PH_SV_HardCoal	Output_Heat_PH_SV_HardCoal	no	no	no	Services PH	#REF!	FireBrick	CapInst_PH_SV_HardCoal	CapNew_PH_SV_HardCoal	CapNewSmooth_PH_SV_HardCoal	CapNewNet_PH_SV_HardCoal	CapDecom_PH_SV_HardCoal	CapDecomSmooth_PH_SV_HardCoal	PH_SV_HardCoal	PH_SV_HardCoal	PH_SV_HardCoal	PH_SV_HardCoal	no
PH_SV_HeatPump	Output_Heat_PH_SV_HeatPump	no	no	no	Services PH	#REF!	FireBrick	CapInst_PH_SV_HeatPump	CapNew_PH_SV_HeatPump	CapNewSmooth_PH_SV_HeatPump	CapNewNet_PH_SV_HeatPump	CapDecom_PH_SV_HeatPump	CapDecomSmooth_PH_SV_HeatPump	PH_SV_HeatPump	PH_SV_HeatPump	PH_SV_HeatPump	PH_SV_HeatPump	no
PH_SV_Lignite	Output_Heat_PH_SV_Lignite	no	no	no	Services PH	#REF!	FireBrick	CapInst_PH_SV_Lignite	CapNew_PH_SV_Lignite	CapNewSmooth_PH_SV_Lignite	CapNewNet_PH_SV_Lignite	CapDecom_PH_SV_Lignite	CapDecomSmooth_PH_SV_Lignite	PH_SV_Lignite	PH_SV_Lignite	PH_SV_Lignite	PH_SV_Lignite	no
PH_SV_Oil	Output_Heat_PH_SV_Oil	no	no	no	Services PH	#REF!	FireBrick	CapInst_PH_SV_Oil	CapNew_PH_SV_Oil	CapNewSmooth_PH_SV_Oil	CapNewNet_PH_SV_Oil	CapDecom_PH_SV_Oil	CapDecomSmooth_PH_SV_Oil	PH_SV_Oil	PH_SV_Oil	PH_SV_Oil	PH_SV_Oil	no
PH_SV_Solar	Output_Heat_PH_SV_Solar	no	no	no	Services PH	#REF!	FireBrick	CapInst_PH_SV_Solar	CapNew_PH_SV_Solar	CapNewSmooth_PH_SV_Solar	CapNewNet_PH_SV_Solar	CapDecom_PH_SV_Solar	CapDecomSmooth_PH_SV_Solar	PH_SV_Solar	PH_SV_Solar	PH_SV_Solar	PH_SV_Solar	no
SH_RES_Biomass	Output_Heat_SH_RES_Biomass	no	no	no	Residential SH	#REF!	Gold	CapInst_SH_RES_Biomass	CapNew_SH_RES_Biomass	CapNewSmooth_SH_RES_Biomass	CapNewNet_SH_RES_Biomass	CapDecom_SH_RES_Biomass	CapDecomSmooth_SH_RES_Biomass	SH_RES_Biomass	SH_RES_Biomass	SH_RES_Biomass	SH_RES_Biomass	no
SH_RES_HardCoal	Output_Heat_SH_RES_HardCoal	no	no	no	Residential SH	#REF!	Gold	CapInst_SH_RES_HardCoal	CapNew_SH_RES_HardCoal	CapNewSmooth_SH_RES_HardCoal	CapNewNet_SH_RES_HardCoal	CapDecom_SH_RES_HardCoal	CapDecomSmooth_SH_RES_HardCoal	SH_RES_HardCoal	SH_RES_HardCoal	SH_RES_HardCoal	SH_RES_HardCoal	no
SH_RES_DistrcitHeat	Output_Heat_SH_RES_DistrictHeat	no	no	no	Residential SH	#REF!	Gold	CapInst_SH_RES_DistrcitHeat	CapNew_SH_RES_DistrcitHeat	CapNewSmooth_SH_RES_DistrcitHeat	CapNewNet_SH_RES_DistrcitHeat	CapDecom_SH_RES_DistrcitHeat	CapDecomSmooth_SH_RES_DistrcitHeat	SH_RES_DistrcitHeat	SH_RES_DistrcitHeat	SH_RES_DistrcitHeat	SH_RES_DistrcitHeat	no
SH_RES_Electric	Output_Heat_SH_RES_Electric	no	no	no	Residential SH	#REF!	Gold	CapInst_SH_RES_Electric	CapNew_SH_RES_Electric	CapNewSmooth_SH_RES_Electric	CapNewNet_SH_RES_Electric	CapDecom_SH_RES_Electric	CapDecomSmooth_SH_RES_Electric	SH_RES_Electric	SH_RES_Electric	SH_RES_Electric	SH_RES_Electric	no
SH_RES_Gas	Output_Heat_SH_RES_Gas	no	no	no	Residential SH	#REF!	Gold	CapInst_SH_RES_Gas	CapNew_SH_RES_Gas	CapNewSmooth_SH_RES_Gas	CapNewNet_SH_RES_Gas	CapDecom_SH_RES_Gas	CapDecomSmooth_SH_RES_Gas	SH_RES_Gas	SH_RES_Gas	SH_RES_Gas	SH_RES_Gas	no
SH_RES_HeatPump	Output_Heat_SH_RES_HeatPump	no	no	no	Residential SH	#REF!	Gold	CapInst_SH_RES_HeatPump	CapNew_SH_RES_HeatPump	CapNewSmooth_SH_RES_HeatPump	CapNewNet_SH_RES_HeatPump	CapDecom_SH_RES_HeatPump	CapDecomSmooth_SH_RES_HeatPump	SH_RES_HeatPump	SH_RES_HeatPump	SH_RES_HeatPump	SH_RES_HeatPump	no
SH_RES_Oil	Output_Heat_SH_RES_Oil	no	no	no	Residential SH	#REF!	Gold	CapInst_SH_RES_Oil	CapNew_SH_RES_Oil	CapNewSmooth_SH_RES_Oil	CapNewNet_SH_RES_Oil	CapDecom_SH_RES_Oil	CapDecomSmooth_SH_RES_Oil	SH_RES_Oil	SH_RES_Oil	SH_RES_Oil	SH_RES_Oil	no
SH_RES_Solar	Output_Heat_SH_RES_Solar	no	no	no	Residential SH	#REF!	Gold	CapInst_SH_RES_Solar	CapNew_SH_RES_Solar	CapNewSmooth_SH_RES_Solar	CapNewNet_SH_RES_Solar	CapDecom_SH_RES_Solar	CapDecomSmooth_SH_RES_Solar	SH_RES_Solar	SH_RES_Solar	SH_RES_Solar	SH_RES_Solar	no
HW_RES_Biomass	Output_Heat_HW_RES_Biomass	no	no	no	Residential HW	#REF!	Moccasin	CapInst_HW_RES_Biomass	CapNew_HW_RES_Biomass	CapNewSmooth_HW_RES_Biomass	CapNewNet_HW_RES_Biomass	CapDecom_HW_RES_Biomass	CapDecomSmooth_HW_RES_Biomass	HW_RES_Biomass	HW_RES_Biomass	HW_RES_Biomass	HW_RES_Biomass	no
HW_RES_HardCoal	Output_Heat_HW_RES_HardCoal	no	no	no	Residential HW	#REF!	Moccasin	CapInst_HW_RES_HardCoal	CapNew_HW_RES_HardCoal	CapNewSmooth_HW_RES_HardCoal	CapNewNet_HW_RES_HardCoal	CapDecom_HW_RES_HardCoal	CapDecomSmooth_HW_RES_HardCoal	HW_RES_HardCoal	HW_RES_HardCoal	HW_RES_HardCoal	HW_RES_HardCoal	no
HW_RES_DistrictHeat	Output_Heat_HW_RES_DistrictHeat	no	no	no	Residential HW	#REF!	Moccasin	CapInst_HW_RES_DistrictHeat	CapNew_HW_RES_DistrictHeat	CapNewSmooth_HW_RES_DistrictHeat	CapNewNet_HW_RES_DistrictHeat	CapDecom_HW_RES_DistrictHeat	CapDecomSmooth_HW_RES_DistrictHeat	HW_RES_DistrictHeat	HW_RES_DistrictHeat	HW_RES_DistrictHeat	HW_RES_DistrictHeat	no
HW_RES_Electric	Output_Heat_HW_RES_Electric	no	no	no	Residential HW	#REF!	Moccasin	CapInst_HW_RES_Electric	CapNew_HW_RES_Electric	CapNewSmooth_HW_RES_Electric	CapNewNet_HW_RES_Electric	CapDecom_HW_RES_Electric	CapDecomSmooth_HW_RES_Electric	HW_RES_Electric	HW_RES_Electric	HW_RES_Electric	HW_RES_Electric	no
HW_RES_Gas	Output_Heat_HW_RES_Gas	no	no	no	Residential HW	#REF!	Moccasin	CapInst_HW_RES_Gas	CapNew_HW_RES_Gas	CapNewSmooth_HW_RES_Gas	CapNewNet_HW_RES_Gas	CapDecom_HW_RES_Gas	CapDecomSmooth_HW_RES_Gas	HW_RES_Gas	HW_RES_Gas	HW_RES_Gas	HW_RES_Gas	no
HW_RES_HeatPump	Output_Heat_HW_RES_HeatPump	no	no	no	Residential HW	#REF!	Moccasin	CapInst_HW_RES_HeatPump	CapNew_HW_RES_HeatPump	CapNewSmooth_HW_RES_HeatPump	CapNewNet_HW_RES_HeatPump	CapDecom_HW_RES_HeatPump	CapDecomSmooth_HW_RES_HeatPump	HW_RES_HeatPump	HW_RES_HeatPump	HW_RES_HeatPump	HW_RES_HeatPump	no
HW_RES_Oil	Output_Heat_HW_RES_Oil	no	no	no	Residential HW	#REF!	Moccasin	CapInst_HW_RES_Oil	CapNew_HW_RES_Oil	CapNewSmooth_HW_RES_Oil	CapNewNet_HW_RES_Oil	CapDecom_HW_RES_Oil	CapDecomSmooth_HW_RES_Oil	HW_RES_Oil	HW_RES_Oil	HW_RES_Oil	HW_RES_Oil	no
HW_RES_Solar	Output_Heat_HW_RES_Solar	no	no	no	Residential HW	#REF!	Moccasin	CapInst_HW_RES_Solar	CapNew_HW_RES_Solar	CapNewSmooth_HW_RES_Solar	CapNewNet_HW_RES_Solar	CapDecom_HW_RES_Solar	CapDecomSmooth_HW_RES_Solar	HW_RES_Solar	HW_RES_Solar	HW_RES_Solar	HW_RES_Solar	no
HP_loc_Biofuel	Output_Heat_HP_loc_Bioliquids	no	no	no	Heating Plants (local)	#REF!	MediumOrchid	CapInst_HP_loc_Biofuel	CapNew_HP_loc_Biofuel	CapNewSmooth_HP_loc_Biofuel	CapNewNet_HP_loc_Biofuel	CapDecom_HP_loc_Biofuel	CapDecomSmooth_HP_loc_Biofuel	HP_loc_Biofuel	HP_loc_Biofuel	HP_loc_Biofuel	HP_loc_Biofuel	no
HP_loc_Biogas	Output_Heat_HP_loc_Biogas	no	no	no	Heating Plants (local)	#REF!	MediumOrchid	CapInst_HP_loc_Biogas	CapNew_HP_loc_Biogas	CapNewSmooth_HP_loc_Biogas	CapNewNet_HP_loc_Biogas	CapDecom_HP_loc_Biogas	CapDecomSmooth_HP_loc_Biogas	HP_loc_Biogas	HP_loc_Biogas	HP_loc_Biogas	HP_loc_Biogas	no
HP_loc_Biomass	Output_Heat_HP_loc_Biomass	no	no	no	Heating Plants (local)	#REF!	MediumOrchid	CapInst_HP_loc_Biomass	CapNew_HP_loc_Biomass	CapNewSmooth_HP_loc_Biomass	CapNewNet_HP_loc_Biomass	CapDecom_HP_loc_Biomass	CapDecomSmooth_HP_loc_Biomass	HP_loc_Biomass	HP_loc_Biomass	HP_loc_Biomass	HP_loc_Biomass	no
HP_loc_Gas	Output_Heat_HP_loc_Gas	no	no	no	Heating Plants (local)	#REF!	MediumOrchid	CapInst_HP_loc_Gas	CapNew_HP_loc_Gas	CapNewSmooth_HP_loc_Gas	CapNewNet_HP_loc_Gas	CapDecom_HP_loc_Gas	CapDecomSmooth_HP_loc_Gas	HP_loc_Gas	HP_loc_Gas	HP_loc_Gas	HP_loc_Gas	no
HP_loc_Geothermal	Output_Heat_HP_loc_Geothermal	no	no	no	Heating Plants (local)	#REF!	MediumOrchid	CapInst_HP_loc_Geothermal	CapNew_HP_loc_Geothermal	CapNewSmooth_HP_loc_Geothermal	CapNewNet_HP_loc_Geothermal	CapDecom_HP_loc_Geothermal	CapDecomSmooth_HP_loc_Geothermal	HP_loc_Geothermal	HP_loc_Geothermal	HP_loc_Geothermal	HP_loc_Geothermal	no
HP_loc_HeatPump	Output_Heat_HP_loc_HeatPump	no	no	no	Heating Plants (local)	#REF!	MediumOrchid	CapInst_HP_loc_HeatPump	CapNew_HP_loc_HeatPump	CapNewSmooth_HP_loc_HeatPump	CapNewNet_HP_loc_HeatPump	CapDecom_HP_loc_HeatPump	CapDecomSmooth_HP_loc_HeatPump	HP_loc_HeatPump	HP_loc_HeatPump	HP_loc_HeatPump	HP_loc_HeatPump	no
HP_loc_LandfillGas	Output_Heat_HP_loc_LandfillGas	no	no	no	Heating Plants (local)	#REF!	MediumOrchid	CapInst_HP_loc_LandfillGas	CapNew_HP_loc_LandfillGas	CapNewSmooth_HP_loc_LandfillGas	CapNewNet_HP_loc_LandfillGas	CapDecom_HP_loc_LandfillGas	CapDecomSmooth_HP_loc_LandfillGas	HP_loc_LandfillGas	HP_loc_LandfillGas	HP_loc_LandfillGas	HP_loc_LandfillGas	no
HP_loc_Oil	Output_Heat_HP_loc_Oil	no	no	no	Heating Plants (local)	#REF!	MediumOrchid	CapInst_HP_loc_Oil	CapNew_HP_loc_Oil	CapNewSmooth_HP_loc_Oil	CapNewNet_HP_loc_Oil	CapDecom_HP_loc_Oil	CapDecomSmooth_HP_loc_Oil	HP_loc_Oil	HP_loc_Oil	HP_loc_Oil	HP_loc_Oil	no
HP_loc_Solar	Output_Heat_HP_loc_Solar	no	no	no	Heating Plants (local)	#REF!	MediumOrchid	CapInst_HP_loc_Solar	CapNew_HP_loc_Solar	CapNewSmooth_HP_loc_Solar	CapNewNet_HP_loc_Solar	CapDecom_HP_loc_Solar	CapDecomSmooth_HP_loc_Solar	HP_loc_Solar	HP_loc_Solar	HP_loc_Solar	HP_loc_Solar	no
HP_reg_Biomass	Output_Heat_HP_reg_Biomass	no	no	no	Heating Plants (regional)	#REF!	DarkViolet	CapInst_HP_reg_Biomass	CapNew_HP_reg_Biomass	CapNewSmooth_HP_reg_Biomass	CapNewNet_HP_reg_Biomass	CapDecom_HP_reg_Biomass	CapDecomSmooth_HP_reg_Biomass	HP_reg_Biomass	HP_reg_Biomass	HP_reg_Biomass	HP_reg_Biomass	no
HP_reg_Electric	Output_Heat_HP_reg_Electric	no	no	no	Heating Plants (regional)	#REF!	DarkViolet	CapInst_HP_reg_Electric	CapNew_HP_reg_Electric	CapNewSmooth_HP_reg_Electric	CapNewNet_HP_reg_Electric	CapDecom_HP_reg_Electric	CapDecomSmooth_HP_reg_Electric	HP_reg_Electric	HP_reg_Electric	HP_reg_Electric	HP_reg_Electric	no
HP_reg_Gas	Output_Heat_HP_reg_Gas	no	no	no	Heating Plants (regional)	#REF!	DarkViolet	CapInst_HP_reg_Gas	CapNew_HP_reg_Gas	CapNewSmooth_HP_reg_Gas	CapNewNet_HP_reg_Gas	CapDecom_HP_reg_Gas	CapDecomSmooth_HP_reg_Gas	HP_reg_Gas	HP_reg_Gas	HP_reg_Gas	HP_reg_Gas	no
HP_reg_HardCoal	Output_Heat_HP_reg_HardCoal	no	no	no	Heating Plants (regional)	#REF!	DarkViolet	CapInst_HP_reg_HardCoal	CapNew_HP_reg_HardCoal	CapNewSmooth_HP_reg_HardCoal	CapNewNet_HP_reg_HardCoal	CapDecom_HP_reg_HardCoal	CapDecomSmooth_HP_reg_HardCoal	HP_reg_HardCoal	HP_reg_HardCoal	HP_reg_HardCoal	HP_reg_HardCoal	no
HP_reg_Lignite	Output_Heat_HP_reg_Lignite	no	no	no	Heating Plants (regional)	#REF!	DarkViolet	CapInst_HP_reg_Lignite	CapNew_HP_reg_Lignite	CapNewSmooth_HP_reg_Lignite	CapNewNet_HP_reg_Lignite	CapDecom_HP_reg_Lignite	CapDecomSmooth_HP_reg_Lignite	HP_reg_Lignite	HP_reg_Lignite	HP_reg_Lignite	HP_reg_Lignite	no
HP_reg_Oil	Output_Heat_HP_reg_Oil	no	no	no	Heating Plants (regional)	#REF!	DarkViolet	CapInst_HP_reg_Oil	CapNew_HP_reg_Oil	CapNewSmooth_HP_reg_Oil	CapNewNet_HP_reg_Oil	CapDecom_HP_reg_Oil	CapDecomSmooth_HP_reg_Oil	HP_reg_Oil	HP_reg_Oil	HP_reg_Oil	HP_reg_Oil	no
HP_reg_Waste	Output_Heat_HP_reg_Waste	no	no	no	Heating Plants (regional)	#REF!	DarkViolet	CapInst_HP_reg_Waste	CapNew_HP_reg_Waste	CapNewSmooth_HP_reg_Waste	CapNewNet_HP_reg_Waste	CapDecom_HP_reg_Waste	CapDecomSmooth_HP_reg_Waste	HP_reg_Waste	HP_reg_Waste	HP_reg_Waste	HP_reg_Waste	no
CONV_H2_Electrolysis	Output_CONV_H2_Electrolysis	no	no	no	Conversion	Tomato	SeaGreen	CapInst_CONV_H2_Electrolysis	CapNew_CONV_H2_Electrolysis	CapNewSmooth_CONV_H2_Electrolysis	CapNewNet_CONV_H2_Electrolysis	CapDecom_CONV_H2_Electrolysis	CapDecomSmooth_CONV_H2_Electrolysis	CONV_H2_Electrolysis	CONV_H2_Electrolysis	CONV_H2_Electrolysis	CONV_H2_Electrolysis	no
CONV_H2_SteamReforming	Output_CONV_H2_SteamReforming	no	no	no	Conversion	LightSalmon	SeaGreen	CapInst_CONV_H2_SteamReforming	CapNew_CONV_H2_SteamReforming	CapNewSmooth_CONV_H2_SteamReforming	CapNewNet_CONV_H2_SteamReforming	CapDecom_CONV_H2_SteamReforming	CapDecomSmooth_CONV_H2_SteamReforming	CONV_H2_SteamReforming	CONV_H2_SteamReforming	CONV_H2_SteamReforming	CONV_H2_SteamReforming	no
CONV_CH4_Methanation	Output_CONV_CH4_Methanation	no	no	no	Conversion	OrangeRed	SeaGreen	CapInst_CONV_CH4_Methanation	CapNew_CONV_CH4_Methanation	CapNewSmooth_CONV_CH4_Methanation	CapNewNet_CONV_CH4_Methanation	CapDecom_CONV_CH4_Methanation	CapDecomSmooth_CONV_CH4_Methanation	CONV_CH4_Methanation	CONV_CH4_Methanation	CONV_CH4_Methanation	CONV_CH4_Methanation	no
CONV_H2_FeedIn	Output_CONV_H2_FeedIn	no	no	no	Conversion	DarkOrange	SeaGreen	CapInst_CONV_H2_FeedIn	CapNew_CONV_H2_FeedIn	CapNewSmooth_CONV_H2_FeedIn	CapNewNet_CONV_H2_FeedIn	CapDecom_CONV_H2_FeedIn	CapDecomSmooth_CONV_H2_FeedIn	CONV_H2_FeedIn	CONV_H2_FeedIn	CONV_H2_FeedIn	CONV_H2_FeedIn	no
CONV_PtL	Output_CONV_PtL	no	no	no	Conversion	Gold	SeaGreen	CapInst_CONV_PtL	CapNew_CONV_PtL	CapNewSmooth_CONV_PtL	CapNewNet_CONV_PtL	CapDecom_CONV_PtL	CapDecomSmooth_CONV_PtL	CONV_PtL	CONV_PtL	CONV_PtL	CONV_PtL	no
CONV_PBtL	Output_CONV_PBtL	no	no	no	Conversion	DarkKhaki	SeaGreen	CapInst_CONV_PBtL	CapNew_CONV_PBtL	CapNewSmooth_CONV_PBtL	CapNewNet_CONV_PBtL	CapDecom_CONV_PBtL	CapDecomSmooth_CONV_PBtL	CONV_PBtL	CONV_PBtL	CONV_PBtL	CONV_PBtL	no
CONV_Bioliq	Output_CONV_Bioliq_Fuels	Output_CONV_Bioliq_Gas	Output_CONV_Bioliq_DistrictHeat	Output_CONV_Bioliq_Electricity	Conversion	GreenYellow	SeaGreen	CapInst_CONV_Bioliq	CapNew_CONV_Bioliq	CapNewSmooth_CONV_Bioliq	CapNewNet_CONV_Bioliq	CapDecom_CONV_Bioliq	CapDecomSmooth_CONV_Bioliq	CONV_Bioliq	CONV_Bioliq	CONV_Bioliq	CONV_Bioliq	no
CONV_Pellets	Output_CONV_Pellets	no	no	no	Conversion	LawnGreen	SeaGreen	CapInst_CONV_Pellets	CapNew_CONV_Pellets	CapNewSmooth_CONV_Pellets	CapNewNet_CONV_Pellets	CapDecom_CONV_Pellets	CapDecomSmooth_CONV_Pellets	CONV_Pellets	CONV_Pellets	CONV_Pellets	CONV_Pellets	no
CONV_BtL	Output_CONV_BtL	no	no	no	Conversion	LimeGreen	SeaGreen	CapInst_CONV_BtL	CapNew_CONV_BtL	CapNewSmooth_CONV_BtL	CapNewNet_CONV_BtL	CapDecom_CONV_BtL	CapDecomSmooth_CONV_BtL	CONV_BtL	CONV_BtL	CONV_BtL	CONV_BtL	no
CONV_Bioethanol	Output_CONV_Bioethanol	no	no	no	Conversion	PaleGreen	SeaGreen	CapInst_CONV_Bioethanol	CapNew_CONV_Bioethanol	CapNewSmooth_CONV_Bioethanol	CapNewNet_CONV_Bioethanol	CapDecom_CONV_Bioethanol	CapDecomSmooth_CONV_Bioethanol	CONV_Bioethanol	CONV_Bioethanol	CONV_Bioethanol	CONV_Bioethanol	no
CONV_Biodiesel	Output_CONV_Biodiesel	no	no	no	Conversion	SeaGreen	SeaGreen	CapInst_CONV_Biodiesel	CapNew_CONV_Biodiesel	CapNewSmooth_CONV_Biodiesel	CapNewNet_CONV_Biodiesel	CapDecom_CONV_Biodiesel	CapDecomSmooth_CONV_Biodiesel	CONV_Biodiesel	CONV_Biodiesel	CONV_Biodiesel	CONV_Biodiesel	no
CONV_Biogas2Grid	Output_CONV_Biogas2Grid	no	no	no	Conversion	YellowGreen	SeaGreen	CapInst_CONV_Biogas2Grid	CapNew_CONV_Biogas2Grid	CapNewSmooth_CONV_Biogas2Grid	CapNewNet_CONV_Biogas2Grid	CapDecom_CONV_Biogas2Grid	CapDecomSmooth_CONV_Biogas2Grid	CONV_Biogas2Grid	CONV_Biogas2Grid	CONV_Biogas2Grid	CONV_Biogas2Grid	no
CONV_Biogas	Output_CONV_Biogas	no	no	no	Conversion	DarkSeaGreen	SeaGreen	CapInst_CONV_Biogas	CapNew_CONV_Biogas	CapNewSmooth_CONV_Biogas	CapNewNet_CONV_Biogas	CapDecom_CONV_Biogas	CapDecomSmooth_CONV_Biogas	CONV_Biogas	CONV_Biogas	CONV_Biogas	CONV_Biogas	no
PC_BEV	TransportServices_PC_BEV	no	no	no	Road Passenger Transport	#REF!	DimGray	CapInst_PC_BEV	CapNew_PC_BEV	CapNewSmooth_PC_BEV	CapNewNet_PC_BEV	CapDecom_PC_BEV	CapDecomSmooth_PC_BEV	PC_BEV	PC_BEV	PC_BEV	PC_BEV	no
PC_Diesel	TransportServices_PC_Diesel	no	no	no	Road Passenger Transport	Gray	DimGray	CapInst_PC_Diesel	CapNew_PC_Diesel	CapNewSmooth_PC_Diesel	CapNewNet_PC_Diesel	CapDecom_PC_Diesel	CapDecomSmooth_PC_Diesel	PC_Diesel	PC_Diesel	PC_Diesel	PC_Diesel	no
PC_Diesel_PHEV	TransportServices_PC_Diesel_PHEV	no	no	no	Road Passenger Transport	DarkGray	DimGray	CapInst_PC_Diesel_PHEV	CapNew_PC_Diesel_PHEV	CapNewSmooth_PC_Diesel_PHEV	CapNewNet_PC_Diesel_PHEV	CapDecom_PC_Diesel_PHEV	CapDecomSmooth_PC_Diesel_PHEV	PC_Diesel_PHEV	PC_Diesel_PHEV	PC_Diesel_PHEV	PC_Diesel_PHEV	no
PC_Gas	TransportServices_PC_Gas	no	no	no	Road Passenger Transport	#REF!	DimGray	CapInst_PC_Gas	CapNew_PC_Gas	CapNewSmooth_PC_Gas	CapNewNet_PC_Gas	CapDecom_PC_Gas	CapDecomSmooth_PC_Gas	PC_Gas	PC_Gas	PC_Gas	PC_Gas	no
PC_H2FuelCell	TransportServices_PC_H2FuelCell	no	no	no	Road Passenger Transport	#REF!	DimGray	CapInst_PC_H2FuelCell	CapNew_PC_H2FuelCell	CapNewSmooth_PC_H2FuelCell	CapNewNet_PC_H2FuelCell	CapDecom_PC_H2FuelCell	CapDecomSmooth_PC_H2FuelCell	PC_H2FuelCell	PC_H2FuelCell	PC_H2FuelCell	PC_H2FuelCell	no
PC_Otto	TransportServices_PC_Otto	no	no	no	Road Passenger Transport	DarkGray	DimGray	CapInst_PC_Otto	CapNew_PC_Otto	CapNewSmooth_PC_Otto	CapNewNet_PC_Otto	CapDecom_PC_Otto	CapDecomSmooth_PC_Otto	PC_Otto	PC_Otto	PC_Otto	PC_Otto	no
PC_Otto_PHEV	TransportServices_PC_Otto_PHEV	no	no	no	Road Passenger Transport	LightGray	DimGray	CapInst_PC_Otto_PHEV	CapNew_PC_Otto_PHEV	CapNewSmooth_PC_Otto_PHEV	CapNewNet_PC_Otto_PHEV	CapDecom_PC_Otto_PHEV	CapDecomSmooth_PC_Otto_PHEV	PC_Otto_PHEV	PC_Otto_PHEV	PC_Otto_PHEV	PC_Otto_PHEV	no
PCbatt_BEV	no	no	no	no	Road Passenger Transport	#REF!	DimGray	CapInst_PCbatt_BEV	CapNew_PCbatt_BEV	CapNewSmooth_PCbatt_BEV	CapNewNet_PCbatt_BEV	CapDecom_PCbatt_BEV	CapDecomSmooth_PCbatt_BEV	PCbatt_BEV	PCbatt_BEV	PCbatt_BEV	PCbatt_BEV	no
PCbatt_Diesel_PHEV	no	no	no	no	Road Passenger Transport	DarkGray	DimGray	CapInst_PCbatt_Diesel_PHEV	CapNew_PCbatt_Diesel_PHEV	CapNewSmooth_PCbatt_Diesel_PHEV	CapNewNet_PCbatt_Diesel_PHEV	CapDecom_PCbatt_Diesel_PHEV	CapDecomSmooth_PCbatt_Diesel_PHEV	PCbatt_Diesel_PHEV	PCbatt_Diesel_PHEV	PCbatt_Diesel_PHEV	PCbatt_Diesel_PHEV	no
PCbatt_H2FuelCell	no	no	no	no	Road Passenger Transport	#REF!	DimGray	CapInst_PCbatt_H2FuelCell	CapNew_PCbatt_H2FuelCell	CapNewSmooth_PCbatt_H2FuelCell	CapNewNet_PCbatt_H2FuelCell	CapDecom_PCbatt_H2FuelCell	CapDecomSmooth_PCbatt_H2FuelCell	PCbatt_H2FuelCell	PCbatt_H2FuelCell	PCbatt_H2FuelCell	PCbatt_H2FuelCell	no
PCbatt_Otto_PHEV	no	no	no	no	Road Passenger Transport	LightGray	DimGray	CapInst_PCbatt_Otto_PHEV	CapNew_PCbatt_Otto_PHEV	CapNewSmooth_PCbatt_Otto_PHEV	CapNewNet_PCbatt_Otto_PHEV	CapDecom_PCbatt_Otto_PHEV	CapDecomSmooth_PCbatt_Otto_PHEV	PCbatt_Otto_PHEV	PCbatt_Otto_PHEV	PCbatt_Otto_PHEV	PCbatt_Otto_PHEV	no
MC_Otto	TransportServices_MC_Otto	no	no	no	Road Passenger Transport	Maroon	DimGray	CapInst_MC_Otto	CapNew_MC_Otto	CapNewSmooth_MC_Otto	CapNewNet_MC_Otto	CapDecom_MC_Otto	CapDecomSmooth_MC_Otto	MC_Otto	MC_Otto	MC_Otto	MC_Otto	no
MC_Electric	TransportServices_MC_Electric	no	no	no	Road Passenger Transport	Brown	DimGray	CapInst_MC_Electric	CapNew_MC_Electric	CapNewSmooth_MC_Electric	CapNewNet_MC_Electric	CapDecom_MC_Electric	CapDecomSmooth_MC_Electric	MC_Electric	MC_Electric	MC_Electric	MC_Electric	no
MC_H2FuelCell	TransportServices_MC_H2FuelCell	no	no	no	Road Passenger Transport	Sienna	DimGray	CapInst_MC_H2FuelCell	CapNew_MC_H2FuelCell	CapNewSmooth_MC_H2FuelCell	CapNewNet_MC_H2FuelCell	CapDecom_MC_H2FuelCell	CapDecomSmooth_MC_H2FuelCell	MC_H2FuelCell	MC_H2FuelCell	MC_H2FuelCell	MC_H2FuelCell	no
PRT_Diesel	TransportServices_PRT_Diesel	no	no	no	Road Passenger Transport	Chocolate	DimGray	CapInst_PRT_Diesel	CapNew_PRT_Diesel	CapNewSmooth_PRT_Diesel	CapNewNet_PRT_Diesel	CapDecom_PRT_Diesel	CapDecomSmooth_PRT_Diesel	PRT_Diesel	PRT_Diesel	PRT_Diesel	PRT_Diesel	no
PRT_Diesel_PHEV	TransportServices_PRT_Diesel_PHEV	no	no	no	Road Passenger Transport	Peru	DimGray	CapInst_PRT_Diesel_PHEV	CapNew_PRT_Diesel_PHEV	CapNewSmooth_PRT_Diesel_PHEV	CapNewNet_PRT_Diesel_PHEV	CapDecom_PRT_Diesel_PHEV	CapDecomSmooth_PRT_Diesel_PHEV	PRT_Diesel_PHEV	PRT_Diesel_PHEV	PRT_Diesel_PHEV	PRT_Diesel_PHEV	no
PRT_Electric	TransportServices_PRT_Electric	no	no	no	Road Passenger Transport	DarkGoldenrod	DimGray	CapInst_PRT_Electric	CapNew_PRT_Electric	CapNewSmooth_PRT_Electric	CapNewNet_PRT_Electric	CapDecom_PRT_Electric	CapDecomSmooth_PRT_Electric	PRT_Electric	PRT_Electric	PRT_Electric	PRT_Electric	no
PRT_Gas	TransportServices_PRT_Gas	no	no	no	Road Passenger Transport	SandyBrown	DimGray	CapInst_PRT_Gas	CapNew_PRT_Gas	CapNewSmooth_PRT_Gas	CapNewNet_PRT_Gas	CapDecom_PRT_Gas	CapDecomSmooth_PRT_Gas	PRT_Gas	PRT_Gas	PRT_Gas	PRT_Gas	no
PRT_H2FuelCell	TransportServices_PRT_H2FuelCell	no	no	no	Road Passenger Transport	Tan	DimGray	CapInst_PRT_H2FuelCell	CapNew_PRT_H2FuelCell	CapNewSmooth_PRT_H2FuelCell	CapNewNet_PRT_H2FuelCell	CapDecom_PRT_H2FuelCell	CapDecomSmooth_PRT_H2FuelCell	PRT_H2FuelCell	PRT_H2FuelCell	PRT_H2FuelCell	PRT_H2FuelCell	no
LDV_Otto	TransportServices_LDV_Otto	no	no	no	Road Freight Transport	Cornsilk	Gray	CapInst_LDV_Otto	CapNew_LDV_Otto	CapNewSmooth_LDV_Otto	CapNewNet_LDV_Otto	CapDecom_LDV_Otto	CapDecomSmooth_LDV_Otto	LDV_Otto	LDV_Otto	LDV_Otto	LDV_Otto	no
LDV_Diesel	TransportServices_LDV_Diesel	no	no	no	Road Freight Transport	NavajoWhite	Gray	CapInst_LDV_Diesel	CapNew_LDV_Diesel	CapNewSmooth_LDV_Diesel	CapNewNet_LDV_Diesel	CapDecom_LDV_Diesel	CapDecomSmooth_LDV_Diesel	LDV_Diesel	LDV_Diesel	LDV_Diesel	LDV_Diesel	no
LDV_Electric	TransportServices_LDV_Electric	no	no	no	Road Freight Transport	BurlyWood	Gray	CapInst_LDV_Electric	CapNew_LDV_Electric	CapNewSmooth_LDV_Electric	CapNewNet_LDV_Electric	CapDecom_LDV_Electric	CapDecomSmooth_LDV_Electric	LDV_Electric	LDV_Electric	LDV_Electric	LDV_Electric	no
LDV_Gas	TransportServices_LDV_Gas	no	no	no	Road Freight Transport	Tan	Gray	CapInst_LDV_Gas	CapNew_LDV_Gas	CapNewSmooth_LDV_Gas	CapNewNet_LDV_Gas	CapDecom_LDV_Gas	CapDecomSmooth_LDV_Gas	LDV_Gas	LDV_Gas	LDV_Gas	LDV_Gas	no
LDV_Hybrid	TransportServices_LDV_Hybrid	no	no	no	Road Freight Transport	SandyBrown	Gray	CapInst_LDV_Hybrid	CapNew_LDV_Hybrid	CapNewSmooth_LDV_Hybrid	CapNewNet_LDV_Hybrid	CapDecom_LDV_Hybrid	CapDecomSmooth_LDV_Hybrid	LDV_Hybrid	LDV_Hybrid	LDV_Hybrid	LDV_Hybrid	no
LDV_H2FuelCell	TransportServices_LDV_H2FuelCell	no	no	no	Road Freight Transport	Goldenrod	Gray	CapInst_LDV_H2FuelCell	CapNew_LDV_H2FuelCell	CapNewSmooth_LDV_H2FuelCell	CapNewNet_LDV_H2FuelCell	CapDecom_LDV_H2FuelCell	CapDecomSmooth_LDV_H2FuelCell	LDV_H2FuelCell	LDV_H2FuelCell	LDV_H2FuelCell	LDV_H2FuelCell	no
HDV_Diesel	TransportServices_HDV_Diesel	no	no	no	Road Freight Transport	DarkGoldenrod	Gray	CapInst_HDV_Diesel	CapNew_HDV_Diesel	CapNewSmooth_HDV_Diesel	CapNewNet_HDV_Diesel	CapDecom_HDV_Diesel	CapDecomSmooth_HDV_Diesel	HDV_Diesel	HDV_Diesel	HDV_Diesel	HDV_Diesel	no
HDV_Hybrid	TransportServices_HDV_Hybrid	no	no	no	Road Freight Transport	Chocolate	Gray	CapInst_HDV_Hybrid	CapNew_HDV_Hybrid	CapNewSmooth_HDV_Hybrid	CapNewNet_HDV_Hybrid	CapDecom_HDV_Hybrid	CapDecomSmooth_HDV_Hybrid	HDV_Hybrid	HDV_Hybrid	HDV_Hybrid	HDV_Hybrid	no
HDV_H2FuelCell	TransportServices_HDV_H2FuelCell	no	no	no	Road Freight Transport	Sienna	Gray	CapInst_HDV_H2FuelCell	CapNew_HDV_H2FuelCell	CapNewSmooth_HDV_H2FuelCell	CapNewNet_HDV_H2FuelCell	CapDecom_HDV_H2FuelCell	CapDecomSmooth_HDV_H2FuelCell	HDV_H2FuelCell	HDV_H2FuelCell	HDV_H2FuelCell	HDV_H2FuelCell	no
HDV_Gas	TransportServices_HDV_Gas	no	no	no	Road Freight Transport	Maroon	Gray	CapInst_HDV_Gas	CapNew_HDV_Gas	CapNewSmooth_HDV_Gas	CapNewNet_HDV_Gas	CapDecom_HDV_Gas	CapDecomSmooth_HDV_Gas	HDV_Gas	HDV_Gas	HDV_Gas	HDV_Gas	no
RAIL_Pass_Electric	TransportServices_RAIL_Pass_Electric	no	no	no	Rail Transport	Silver	DarkGray	CapInst_RAIL_Pass_Electric	CapNew_RAIL_Pass_Electric	CapNewSmooth_RAIL_Pass_Electric	CapNewNet_RAIL_Pass_Electric	CapDecom_RAIL_Pass_Electric	CapDecomSmooth_RAIL_Pass_Electric	RAIL_Pass_Electric	RAIL_Pass_Electric	RAIL_Pass_Electric	RAIL_Pass_Electric	no
RAIL_Pass_Diesel	TransportServices_RAIL_Pass_Diesel	no	no	no	Rail Transport	Maroon	DarkGray	CapInst_RAIL_Pass_Diesel	CapNew_RAIL_Pass_Diesel	CapNewSmooth_RAIL_Pass_Diesel	CapNewNet_RAIL_Pass_Diesel	CapDecom_RAIL_Pass_Diesel	CapDecomSmooth_RAIL_Pass_Diesel	RAIL_Pass_Diesel	RAIL_Pass_Diesel	RAIL_Pass_Diesel	RAIL_Pass_Diesel	no
RAIL_Pass_H2FuelCell	TransportServices_RAIL_Pass_H2FuelCell	no	no	no	Rail Transport	DeepSkyBlue	DarkGray	CapInst_RAIL_Pass_H2FuelCell	CapNew_RAIL_Pass_H2FuelCell	CapNewSmooth_RAIL_Pass_H2FuelCell	CapNewNet_RAIL_Pass_H2FuelCell	CapDecom_RAIL_Pass_H2FuelCell	CapDecomSmooth_RAIL_Pass_H2FuelCell	RAIL_Pass_H2FuelCell	RAIL_Pass_H2FuelCell	RAIL_Pass_H2FuelCell	RAIL_Pass_H2FuelCell	no
RAIL_Freight_Electric	TransportServices_RAIL_Freight_Electric	no	no	no	Rail Transport	DarkGray	DarkGray	CapInst_RAIL_Freight_Electric	CapNew_RAIL_Freight_Electric	CapNewSmooth_RAIL_Freight_Electric	CapNewNet_RAIL_Freight_Electric	CapDecom_RAIL_Freight_Electric	CapDecomSmooth_RAIL_Freight_Electric	RAIL_Freight_Electric	RAIL_Freight_Electric	RAIL_Freight_Electric	RAIL_Freight_Electric	no
RAIL_Freight_Diesel	TransportServices_RAIL_Freight_Diesel	no	no	no	Rail Transport	Sienna	DarkGray	CapInst_RAIL_Freight_Diesel	CapNew_RAIL_Freight_Diesel	CapNewSmooth_RAIL_Freight_Diesel	CapNewNet_RAIL_Freight_Diesel	CapDecom_RAIL_Freight_Diesel	CapDecomSmooth_RAIL_Freight_Diesel	RAIL_Freight_Diesel	RAIL_Freight_Diesel	RAIL_Freight_Diesel	RAIL_Freight_Diesel	no
RAIL_Freight_H2FuelCell	TransportServices_RAIL_Freight_H2FuelCell	no	no	no	Rail Transport	LightSkyBlue	DarkGray	CapInst_RAIL_Freight_H2FuelCell	CapNew_RAIL_Freight_H2FuelCell	CapNewSmooth_RAIL_Freight_H2FuelCell	CapNewNet_RAIL_Freight_H2FuelCell	CapDecom_RAIL_Freight_H2FuelCell	CapDecomSmooth_RAIL_Freight_H2FuelCell	RAIL_Freight_H2FuelCell	RAIL_Freight_H2FuelCell	RAIL_Freight_H2FuelCell	RAIL_Freight_H2FuelCell	no
AVI_Pass	TransportServices_AVI_Pass	no	no	no	Aviation	RoyalBlue	Silver	CapInst_AVI_Pass	CapNew_AVI_Pass	CapNewSmooth_AVI_Pass	CapNewNet_AVI_Pass	CapDecom_AVI_Pass	CapDecomSmooth_AVI_Pass	AVI_Pass	AVI_Pass	AVI_Pass	AVI_Pass	no
AVI_Freight	TransportServices_AVI_Freight	no	no	no	Aviation	DarkTurquoise	Silver	CapInst_AVI_Freight	CapNew_AVI_Freight	CapNewSmooth_AVI_Freight	CapNewNet_AVI_Freight	CapDecom_AVI_Freight	CapDecomSmooth_AVI_Freight	AVI_Freight	AVI_Freight	AVI_Freight	AVI_Freight	no
NAV_DieselInland	TransportServices_NAV_DieselInland	no	no	no	Navigation	Tan	Gainsboro	CapInst_NAV_DieselInland	CapNew_NAV_DieselInland	CapNewSmooth_NAV_DieselInland	CapNewNet_NAV_DieselInland	CapDecom_NAV_DieselInland	CapDecomSmooth_NAV_DieselInland	NAV_DieselInland	NAV_DieselInland	NAV_DieselInland	NAV_DieselInland	no
NAV_GasInland	TransportServices_NAV_GasInland	no	no	no	Navigation	DarkGoldenrod	Gainsboro	CapInst_NAV_GasInland	CapNew_NAV_GasInland	CapNewSmooth_NAV_GasInland	CapNewNet_NAV_GasInland	CapDecom_NAV_GasInland	CapDecomSmooth_NAV_GasInland	NAV_GasInland	NAV_GasInland	NAV_GasInland	NAV_GasInland	no
NAV_DieselMarine	TransportServices_NAV_DieselMarine	no	no	no	Navigation	Maroon	Gainsboro	CapInst_NAV_DieselMarine	CapNew_NAV_DieselMarine	CapNewSmooth_NAV_DieselMarine	CapNewNet_NAV_DieselMarine	CapDecom_NAV_DieselMarine	CapDecomSmooth_NAV_DieselMarine	NAV_DieselMarine	NAV_DieselMarine	NAV_DieselMarine	NAV_DieselMarine	no
CONV_PtL_Imp	Output_CONV_PtL_Imp	no	no	no	Synfuel Imports	Gold	Khaki	CapInst_CONV_PtL_Imp	CapNew_CONV_PtL_Imp	CapNewSmooth_CONV_PtL_Imp	CapNewNet_CONV_PtL_Imp	CapDecom_CONV_PtL_Imp	CapDecomSmooth_CONV_PtL_Imp	CONV_PtL_Imp	CONV_PtL_Imp	CONV_PtL_Imp	CONV_PtL_Imp	no
CONV_Methanation_Imp	Output_CONV_Methanation_Imp	no	no	no	Synfuel Imports	#REF!	Khaki	CapInst_CONV_Methanation_Imp	CapNew_CONV_Methanation_Imp	CapNewSmooth_CONV_Methanation_Imp	CapNewNet_CONV_Methanation_Imp	CapDecom_CONV_Methanation_Imp	CapDecomSmooth_CONV_Methanation_Imp	CONV_Methanation_Imp	CONV_Methanation_Imp	CONV_Methanation_Imp	CONV_Methanation_Imp	no
CONV_H2prod_Electrolyis_Imp	Output_CONV_H2prod_Electrolyis_Imp	no	no	no	Synfuel Imports	Tomato	Khaki	CapInst_CONV_H2prod_Electrolyis_Imp	CapNew_CONV_H2prod_Electrolyis_Imp	CapNewSmooth_CONV_H2prod_Electrolyis_Imp	CapNewNet_CONV_H2prod_Electrolyis_Imp	CapDecom_CONV_H2prod_Electrolyis_Imp	CapDecomSmooth_CONV_H2prod_Electrolyis_Imp	CONV_H2prod_Electrolyis_Imp	CONV_H2prod_Electrolyis_Imp	CONV_H2prod_Electrolyis_Imp	CONV_H2prod_Electrolyis_Imp	no
PP_Wind_offshore_ImpSF	Output_PP_Wind_offshore_ImpSF	no	no	no	Synfuel Imports	#REF!	Khaki	CapInst_PP_Wind_offshore_ImpSF	CapNew_PP_Wind_offshore_ImpSF	CapNewSmooth_PP_Wind_offshore_ImpSF	CapNewNet_PP_Wind_offshore_ImpSF	CapDecom_PP_Wind_offshore_ImpSF	CapDecomSmooth_PP_Wind_offshore_ImpSF	PP_Wind_offshore_ImpSF	PP_Wind_offshore_ImpSF	PP_Wind_offshore_ImpSF	PP_Wind_offshore_ImpSF	no
PP_Wind_onshore_ImpSF	Output_PP_Wind_onshore_ImpSF	no	no	no	Synfuel Imports	#REF!	Khaki	CapInst_PP_Wind_onshore_ImpSF	CapNew_PP_Wind_onshore_ImpSF	CapNewSmooth_PP_Wind_onshore_ImpSF	CapNewNet_PP_Wind_onshore_ImpSF	CapDecom_PP_Wind_onshore_ImpSF	CapDecomSmooth_PP_Wind_onshore_ImpSF	PP_Wind_onshore_ImpSF	PP_Wind_onshore_ImpSF	PP_Wind_onshore_ImpSF	PP_Wind_onshore_ImpSF	no
PP_PV_power_station_ImpSF	Output_PP_PV_power_station_ImpSF	no	no	no	Synfuel Imports	#REF!	Khaki	CapInst_PP_PV_power_station_ImpSF	CapNew_PP_PV_power_station_ImpSF	CapNewSmooth_PP_PV_power_station_ImpSF	CapNewNet_PP_PV_power_station_ImpSF	CapDecom_PP_PV_power_station_ImpSF	CapDecomSmooth_PP_PV_power_station_ImpSF	PP_PV_power_station_ImpSF	PP_PV_power_station_ImpSF	PP_PV_power_station_ImpSF	PP_PV_power_station_ImpSF	no
PP_CSP_ImpSF	Output_PP_CSP_ImpSF	no	no	no	Synfuel Imports	#REF!	Khaki	CapInst_PP_CSP_ImpSF	CapNew_PP_CSP_ImpSF	CapNewSmooth_PP_CSP_ImpSF	CapNewNet_PP_CSP_ImpSF	CapDecom_PP_CSP_ImpSF	CapDecomSmooth_PP_CSP_ImpSF	PP_CSP_ImpSF	PP_CSP_ImpSF	PP_CSP_ImpSF	PP_CSP_ImpSF	no
PP_Wind_onshore_Imp	Output_PP_Wind_onshore_Imp	no	no	no	RES Power Imports	#REF!	GreenYellow	CapInst_PP_Wind_onshore_Imp	CapNew_PP_Wind_onshore_Imp	CapNewSmooth_PP_Wind_onshore_Imp	CapNewNet_PP_Wind_onshore_Imp	CapDecom_PP_Wind_onshore_Imp	CapDecomSmooth_PP_Wind_onshore_Imp	PP_Wind_onshore_Imp	PP_Wind_onshore_Imp	PP_Wind_onshore_Imp	PP_Wind_onshore_Imp	no
PP_Wind_offshore_Imp	Output_PP_Wind_offshore_Imp	no	no	no	RES Power Imports	#REF!	GreenYellow	CapInst_PP_Wind_offshore_Imp	CapNew_PP_Wind_offshore_Imp	CapNewSmooth_PP_Wind_offshore_Imp	CapNewNet_PP_Wind_offshore_Imp	CapDecom_PP_Wind_offshore_Imp	CapDecomSmooth_PP_Wind_offshore_Imp	PP_Wind_offshore_Imp	PP_Wind_offshore_Imp	PP_Wind_offshore_Imp	PP_Wind_offshore_Imp	no
PP_PV_power_station_Imp	Output_PP_PV_power_station_Imp	no	no	no	RES Power Imports	#REF!	GreenYellow	CapInst_PP_PV_power_station_Imp	CapNew_PP_PV_power_station_Imp	CapNewSmooth_PP_PV_power_station_Imp	CapNewNet_PP_PV_power_station_Imp	CapDecom_PP_PV_power_station_Imp	CapDecomSmooth_PP_PV_power_station_Imp	PP_PV_power_station_Imp	PP_PV_power_station_Imp	PP_PV_power_station_Imp	PP_PV_power_station_Imp	no
PP_CSP_Imp	Output_PP_CSP_Imp	no	no	no	RES Power Imports	#REF!	GreenYellow	CapInst_PP_CSP_Imp	CapNew_PP_CSP_Imp	CapNewSmooth_PP_CSP_Imp	CapNewNet_PP_CSP_Imp	CapDecom_PP_CSP_Imp	CapDecomSmooth_PP_CSP_Imp	PP_CSP_Imp	PP_CSP_Imp	PP_CSP_Imp	PP_CSP_Imp	no

## Sheet: assign2enduse InNOSys - old
Technology	Assign2EndUse	Delete in Python	Enduse and intermediate Sectors	Assign2EndUse2	colors enduse sectors	enduse sector names
CHP_loc_P_Biogas	P_pub		SH_RES	SH_RES	Cyan	RES Space Heat
CHP_loc_H_Biogas	DH		HW_RES	HW_RES	DeepSkyBlue	RES Hot Water
CHP_loc_P_Bioliquids	P_pub		OTH_RES	OTH_RES	RoyalBlue	RES Other Appl
CHP_loc_H_Bioliquids	DH		PH_SV	PH_SV	NavajoWhite	SV Space Heat/Hot Water
CHP_loc_P_Biomass	P_pub		SHHW_SV	SHHW_SV	Goldenrod	SV Process Heat
CHP_loc_H_Biomass	DH		OTH_SV	OTH_SV	DarkGoldenrod	SV Other Appl
CHP_loc_P_Gas	P_pub		SHHW_IND	SHHW_IND	LightSalmon	IND Space Heat/Hot Water
CHP_loc_H_Gas	DH		PH_IND	PH_IND	Tomato	IND Process Heat
CHP_loc_P_GasFuelCell	P_pub		OTH_IND	OTH_IND	Crimson	IND Other Appl.
CHP_loc_H_GasFuelCell	DH		PC	PC	Plum	Passenger Cars
CHP_loc_P_Geothermal	P_pub		PTr	PTr	Orchid	Passenger Trains
CHP_loc_H_Geothermal	DH		PAvi	PAvi	MediumPurple	Passenger Aviation
CHP_loc_P_H2FuelCell	P_pub		FrC	FrC	LightGreen	Freight Cars
CHP_loc_H_H2FuelCell	DH		FrTr	FrTr	MediumSeaGreen	Freight Trains
CHP_loc_P_LandfillGas	P_pub		FrAvi	FrAvi	Green	Freight Aviation
CHP_loc_H_LandfillGas	DH		FrNavi	FrNavi	DarkGreen	Navigation
CHP_loc_P_Oil	P_pub		NonEnergy	NonEnergy	Grey	Non-energy cons.
CHP_loc_H_Oil	DH		PP	P_pub	no	no
CHP_reg_P_Biomass	P_pub		CHP_loc_H	DH	no	no
CHP_reg_H_Biomass	DH		CHP_loc_P	P_pub	no	no
CHP_reg_P_Gas_CCS	P_pub		CHP_reg_H	DH	no	no
CHP_reg_H_Gas_CCS	DH		CHP_reg_P	P_pub	no	no
CHP_reg_P_Gas_noCCS	P_pub		CHP_RES_H	CHP_RES_H	no	no
CHP_reg_H_Gas_noCCS	DH		CHP_RES_P	CHP_RES_P	no	no
CHP_reg_P_HardCoal_CCS	P_pub		CHP_SV_H	CHP_SV_H	no	no
CHP_reg_H_HardCoal_CCS	DH		CHP_SV_P	CHP_SV_P	no	no
CHP_reg_P_HardCoal_noCCS	P_pub		CHP_IND_H	CHP_IND_H	no	no
CHP_reg_H_HardCoal_noCCS	DH		CHP_IND_P	CHP_IND_P	no	no
CHP_reg_P_Lignite_CCS	P_pub		HP_loc	DH	no	no
CHP_reg_H_Lignite_CCS	DH		HP_reg	DH	no	no
CHP_reg_P_Lignite_noCCS	P_pub		H2	H2dir	no	no
CHP_reg_H_Lignite_noCCS	DH		H2grid	GasGrid	no	no
CHP_reg_P_Oil	P_pub		CH4	GasGrid	no	no
CHP_reg_H_Oil	DH		Synfuel	Synfuel	no	no
CHP_reg_P_Waste	P_pub		Biodiesel	Biodiesel	no	no
CHP_reg_H_Waste	DH		Bioethanol	Bioethanol	no	no
PP_Biogas	P_pub		Biogas	Biogas	no	no
PP_Bioliquids	P_pub		Biomass	Biomass	no	no
PP_Biomass	P_pub		BtL	BtL	no	no
PP_GasCC_CCS	P_pub
PP_GasCC_noCCS	P_pub
PP_GasGT	P_pub
PP_Geothermal	P_pub
PP_HardCoal_CCS	P_pub
PP_HardCoal_noCCS	P_pub
PP_Hydro_medium	P_pub
PP_Hydro_large	P_pub
PP_Hydro_small	P_pub
PP_LandfillGas	P_pub
PP_Lignite_CCS	P_pub
PP_Lignite_noCCS	P_pub
PP_Nuclear	P_pub
PP_Ocean	P_pub
PP_Oil	P_pub
PP_PV_buildings	P_pub
PP_PV_power_station	P_pub
PP_Waste	P_pub
PP_Wind_offshore	P_pub
PP_Wind_onshore	P_pub
CHP_RES_P_Biomass	CHP_RES_P
CHP_RES_H_Biomass	CHP_RES_H
CHP_RES_P_GasFuelCell	CHP_RES_P
CHP_RES_H_GasFuelCell	CHP_RES_H
CHP_RES_P_Gas	CHP_RES_P
CHP_RES_H_Gas	CHP_RES_H
CHP_IND_P_Biofuel	CHP_IND_P
CHP_IND_H_Biofuel	CHP_IND_H
CHP_IND_P_Biogas	CHP_IND_P
CHP_IND_H_Biogas	CHP_IND_H
CHP_IND_P_Biomass	CHP_IND_P
CHP_IND_H_Biomass	CHP_IND_H
CHP_IND_P_Gas	CHP_IND_P
CHP_IND_H_Gas	CHP_IND_H
CHP_IND_P_Gas_BHKW	CHP_IND_P
CHP_IND_H_Gas_BHKW	CHP_IND_H
CHP_IND_P_GasFuelCell	CHP_IND_P
CHP_IND_H_GasFuelCell	CHP_IND_H
CHP_IND_P_H2FuelCell	CHP_IND_P
CHP_IND_H_H2FuelCell	CHP_IND_H
CHP_IND_P_HardCoal	CHP_IND_P
CHP_IND_H_HardCoal	CHP_IND_H
CHP_IND_P_LandfillGas	CHP_IND_P
CHP_IND_H_LandfillGas	CHP_IND_H
CHP_IND_P_Lignite	CHP_IND_P
CHP_IND_H_Lignite	CHP_IND_H
CHP_IND_P_Oil	CHP_IND_P
CHP_IND_H_Oil	CHP_IND_H
CHP_SV_P_Biofuel	CHP_SV_P
CHP_SV_H_Biofuel	CHP_SV_H
CHP_SV_P_Biogas	CHP_SV_P
CHP_SV_H_Biogas	CHP_SV_H
CHP_SV_P_Biomass	CHP_SV_P
CHP_SV_H_Biomass	CHP_SV_H
CHP_SV_P_Gas	CHP_SV_P
CHP_SV_H_Gas	CHP_SV_H
CHP_SV_P_GasFuelCell	CHP_SV_P
CHP_SV_H_GasFuelCell	CHP_SV_H
CHP_SV_P_GasMicro	CHP_SV_P
CHP_SV_H_GasMicro	CHP_SV_H
CHP_SV_P_H2FuelCell	CHP_SV_P
CHP_SV_H_H2FuelCell	CHP_SV_H
CHP_SV_P_Oil	CHP_SV_P
CHP_SV_H_Oil	CHP_SV_H
PStor_PHS	P_pub
PStor_Li	P_pub
PStor_VRFB	P_pub
PStor_CAES	P_pub
PStorRes_PHS	P_pub
PStorRes_Li	P_pub
PStorRes_VRFB	P_pub
PStorRes_CAES	P_pub
SHHW_IND_Biomass	SHHW_IND
SHHW_IND_DistrictHeat	SHHW_IND
SHHW_IND_Electric	SHHW_IND
SHHW_IND_Gas	SHHW_IND
SHHW_IND_Geothermal	SHHW_IND
SHHW_IND_HardCoal	SHHW_IND
SHHW_IND_HeatPump	SHHW_IND
SHHW_IND_Lignite	SHHW_IND
SHHW_IND_Oil	SHHW_IND
SHHW_IND_Solar	SHHW_IND
PH_IND_Biomass	PH_IND
PH_IND_CoalProducts	PH_IND
PH_IND_DistrictHeat	PH_IND
PH_IND_Electric	PH_IND
PH_IND_Gas	PH_IND
PH_IND_Geothermal	PH_IND
PH_IND_H2	PH_IND
PH_IND_HardCoal	PH_IND
PH_IND_HeatPump	PH_IND
PH_IND_Lignite	PH_IND
PH_IND_Oil	PH_IND
PH_IND_OilProducts	PH_IND
PH_IND_Solar	PH_IND
SHHW_SV_Biogas	SHHW_SV
SHHW_SV_Biomass	SHHW_SV
SHHW_SV_DistrictHeat	SHHW_SV
SHHW_SV_Electric	SHHW_SV
SHHW_SV_Gas	SHHW_SV
SHHW_SV_Geothermal	SHHW_SV
SHHW_SV_HardCoal	SHHW_SV
SHHW_SV_HeatPump	SHHW_SV
SHHW_SV_Oil	SHHW_SV
SHHW_SV_Solar	SHHW_SV
PH_SV_Biomass	PH_SV
PH_SV_DistrictHeat	PH_SV
PH_SV_Electric	PH_SV
PH_SV_Gas	PH_SV
PH_SV_Geothermal	PH_SV
PH_SV_HardCoal	PH_SV
PH_SV_HeatPump	PH_SV
PH_SV_Lignite	PH_SV
PH_SV_Oil	PH_SV
PH_SV_Solar	PH_SV
SH_RES_Biomass	SH_RES
SH_RES_HardCoal	SH_RES
SH_RES_DistrcitHeat	SH_RES
SH_RES_Electric	SH_RES
SH_RES_Gas	SH_RES
SH_RES_HeatPump	SH_RES
SH_RES_Oil	SH_RES
SH_RES_Solar	SH_RES
HW_RES_Biomass	HW_RES
HW_RES_HardCoal	HW_RES
HW_RES_DistrictHeat	HW_RES
HW_RES_Electric	HW_RES
HW_RES_Gas	HW_RES
HW_RES_HeatPump	HW_RES
HW_RES_Oil	HW_RES
HW_RES_Solar	HW_RES
HP_loc_Biofuel	DH
HP_loc_Biogas	DH
HP_loc_Biomass	DH
HP_loc_Gas	DH
HP_loc_Geothermal	DH
HP_loc_HeatPump	DH
HP_loc_LandfillGas	DH
HP_loc_Oil	DH
HP_loc_Solar	DH
HP_reg_Biomass	DH
HP_reg_Electric	DH
HP_reg_Gas	DH
HP_reg_HardCoal	DH
HP_reg_Lignite	DH
HP_reg_Oil	DH
HP_reg_Waste	DH
CONV_H2_Electrolysis	H2dir
CONV_H2_SteamReforming	H2dir
CONV_CH4_Methanation	GasGrid
CONV_H2_FeedIn	GasGrid
CONV_PtL	Synfuel
CONV_PBtL	Synfuel
CONV_Bioliq	Synfuel
CONV_Pellets	Biomass
CONV_BtL	BtL
CONV_Bioethanol	Bioethanol
CONV_Biodiesel	Biodiesel
CONV_Biogas2Grid	GasGrid
CONV_Biogas	Biogas
PC_BEV	PC
PC_Diesel	PC
PC_Diesel_PHEV	PC
PC_Gas	PC
PC_H2FuelCell	PC
PC_Otto	PC
PC_Otto_PHEV	PC
PCbatt_BEV	PC
PCbatt_Diesel_PHEV	PC
PCbatt_H2FuelCell	PC
PCbatt_Otto_PHEV	PC
MC_Otto	PC
MC_Electric	PC
MC_H2FuelCell	PC
PRT_Diesel	PC
PRT_Diesel_PHEV	PC
PRT_Electric	PC
PRT_Gas	PC
PRT_H2FuelCell	PC
LDV_Otto	FrC
LDV_Diesel	FrC
LDV_Electric	FrC
LDV_Gas	FrC
LDV_Hybrid	FrC
LDV_H2FuelCell	FrC
HDV_Diesel	FrC
HDV_Hybrid	FrC
HDV_H2FuelCell	FrC
HDV_Gas	FrC
RAIL_Pass_Electric	PTr
RAIL_Pass_Diesel	PTr
RAIL_Pass_H2FuelCell	PTr
RAIL_Freight_Electric	FrTr
RAIL_Freight_Diesel	FrTr
RAIL_Freight_H2FuelCell	FrTr
AVI_Pass	PAvi
AVI_Freight	FrAvi
NAV_DieselInland	FrNavi
NAV_GasInland	FrNavi
NAV_DieselMarine	FrNavi
CONV_PtL_Imp	P2X_Imports
CONV_Methanation_Imp	P2X_Imports
CONV_H2prod_Electrolyis_Imp	P2X_Imports
PP_Wind_offshore_ImpSF	P2X_Imports
PP_Wind_onshore_ImpSF	P2X_Imports
PP_PV_power_station_ImpSF	P2X_Imports
PP_CSP_ImpSF	P2X_Imports
PP_Wind_onshore_Imp	P_pub
PP_Wind_offshore_Imp	P_pub
PP_PV_power_station_Imp	P_pub
PP_CSP_Imp	P_pub

## Sheet: Stand Sec Order InNOSys - old
ALL SECTORS	ENDUSE SECTORS
Power Plants	SH_RES
CHP (regional)	HW_RES
CHP (local)	OTH_RES
CHP (industry)	PH_SV
CHP (services)	SHHW_SV
CHP (residential)	OTH_SV
Power Storage	SHHW_IND
Heating Plants (regional)	PH_IND
Heating Plants (local)	OTH_IND
Industry SH/HW	PC
Industry PH	PTr
Services SH/HW	PAvi
Services PH	FrC
Residential SH	FrTr
Residential HW	FrAvi
Conversion	FrNavi
Road Passenger Transport	NonEnergy
Road Freight Transport
Rail Transport
Aviation
RES Power Imports
